# Supplementary material
Source: PubMed Central journal article supplement (PMC7050105)

Agrin  
SIESTLDDLFR

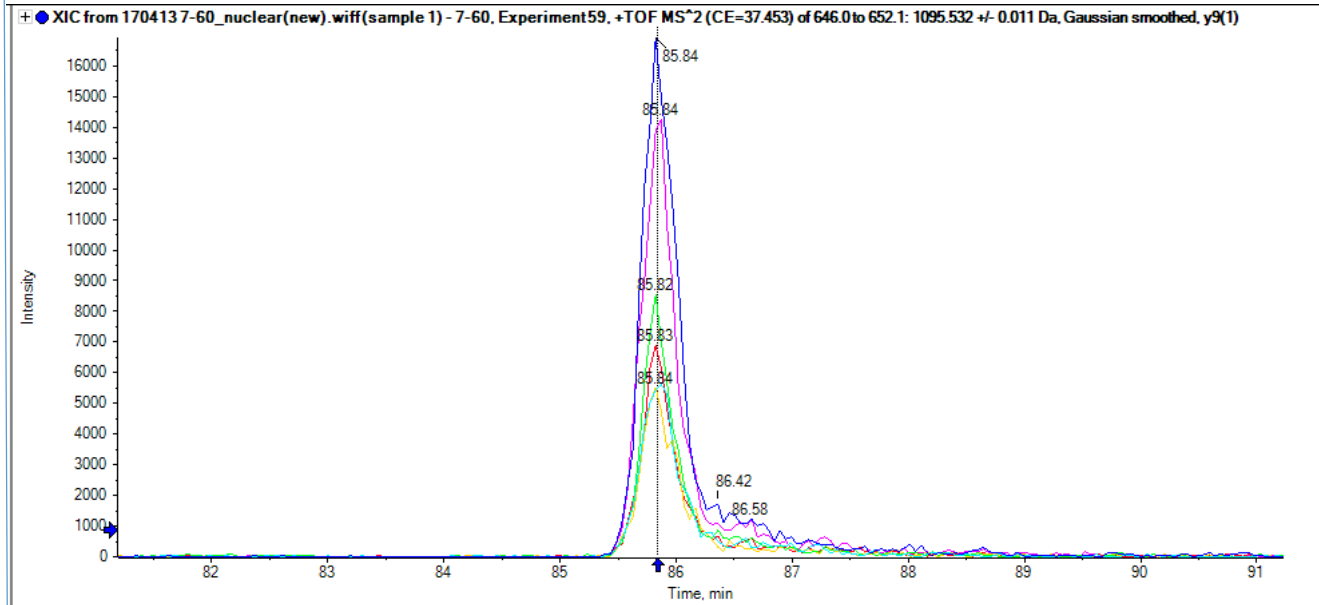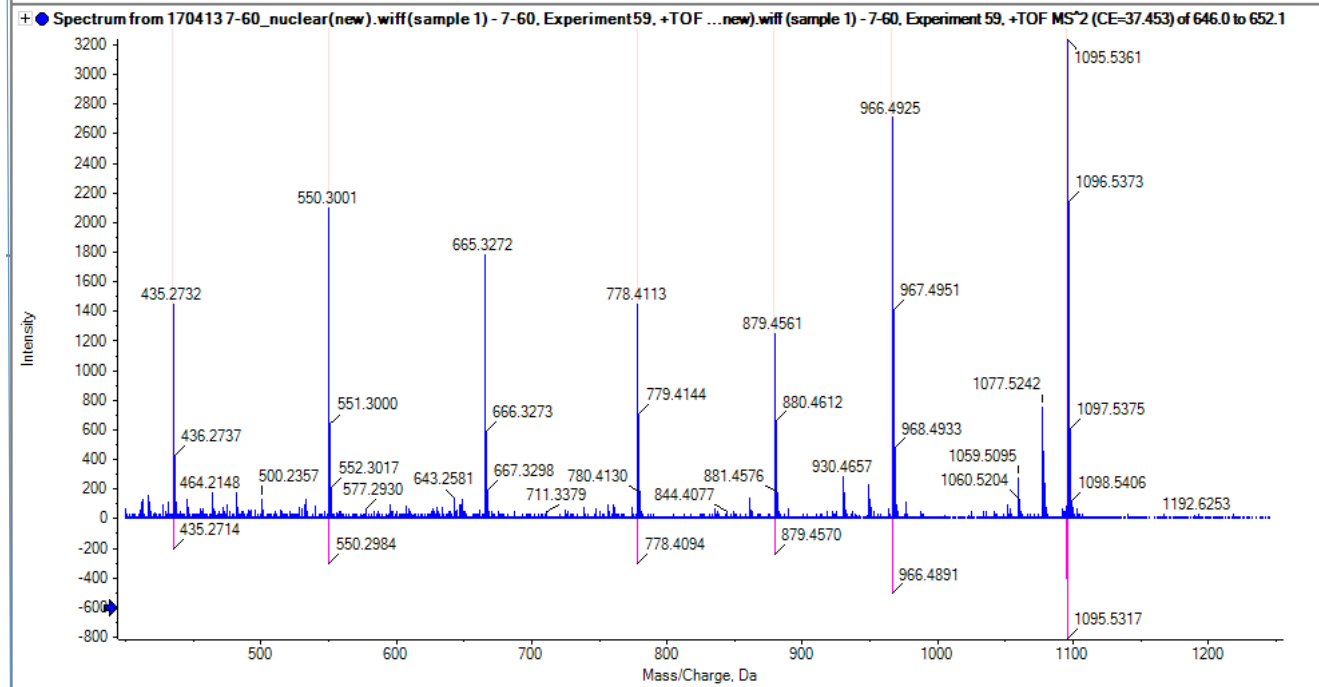

# Cysteine-rich secretory protein LVTDLPNVQEEIVNIHALR

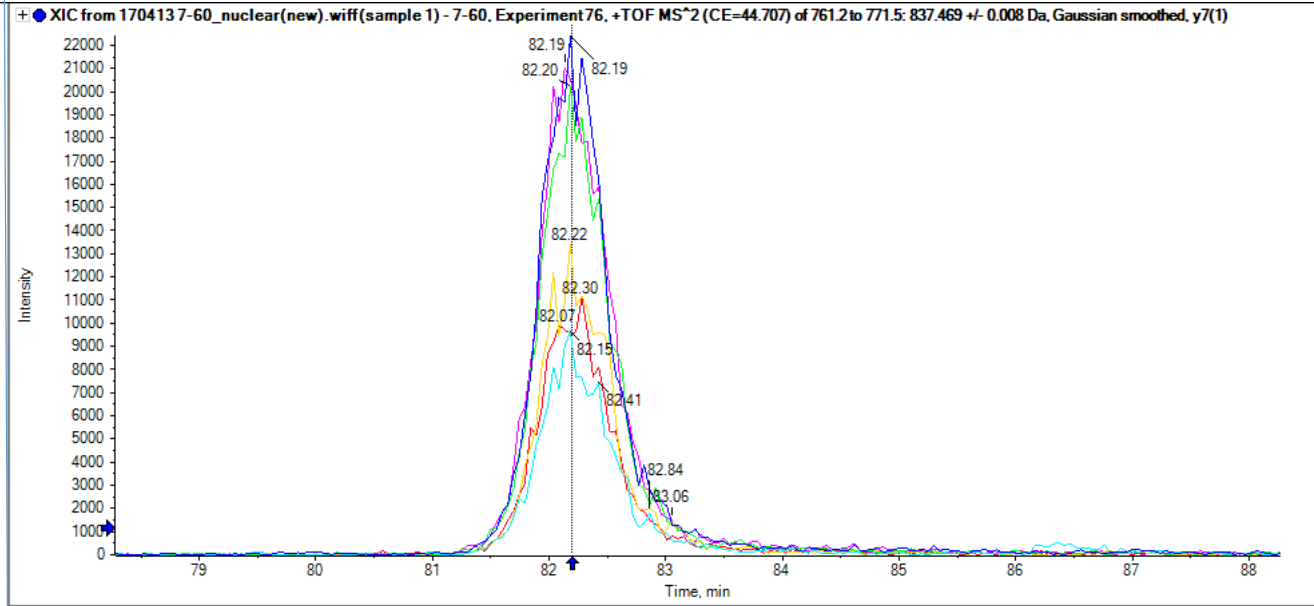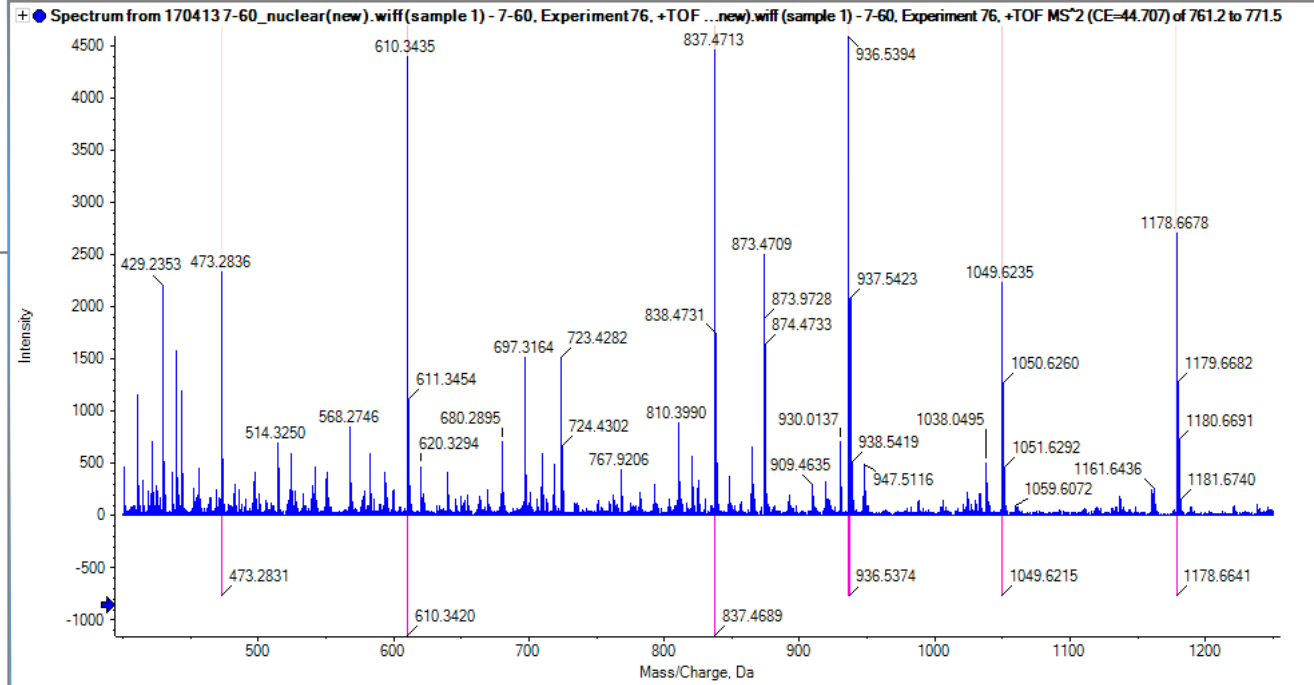

# Glypican-1 SFVQGLGVASDVVR

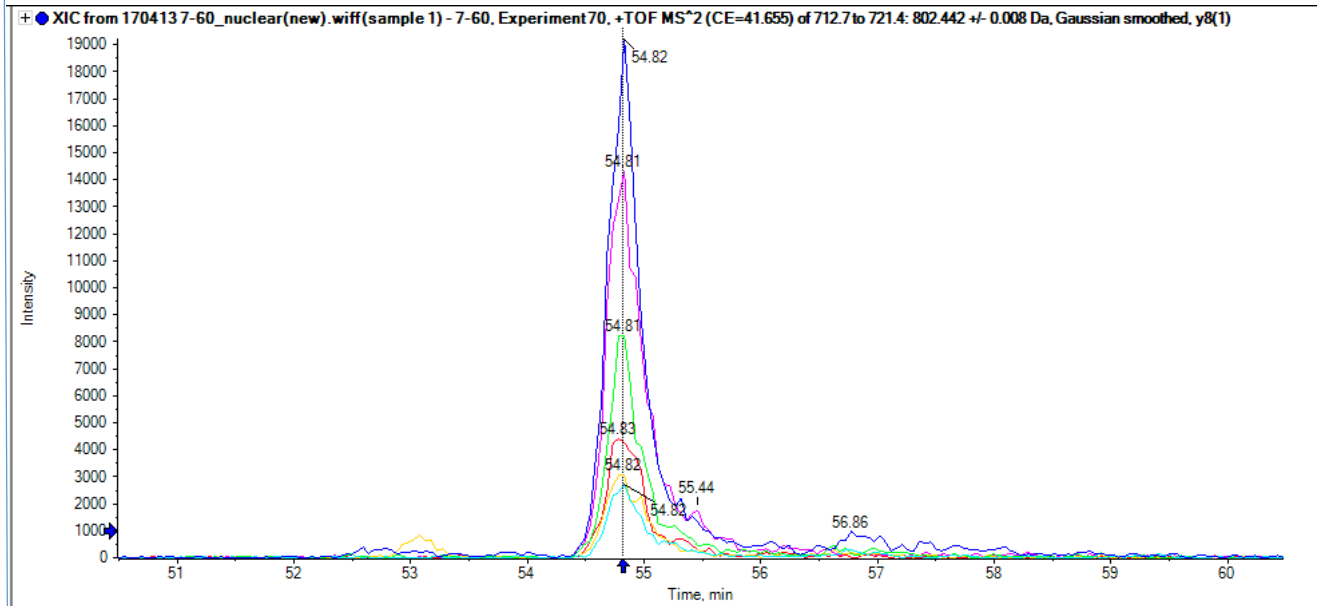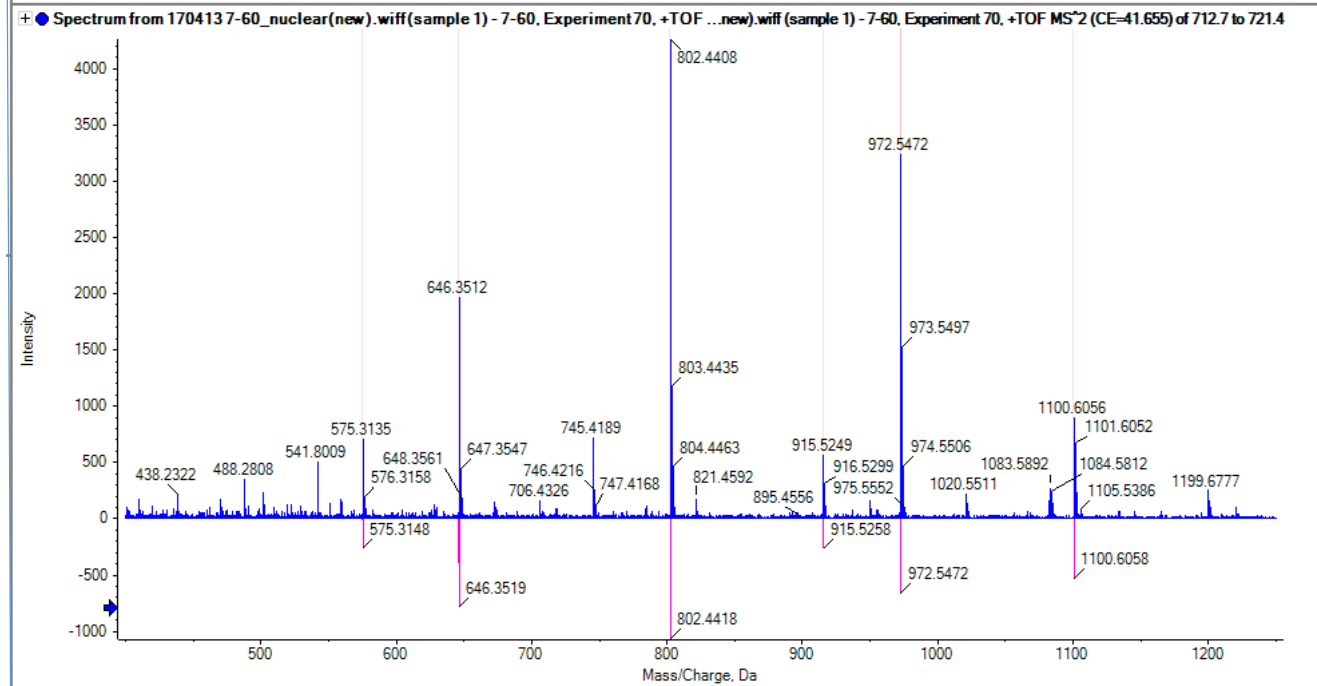

TOP2A  
ELILFSNSDNER

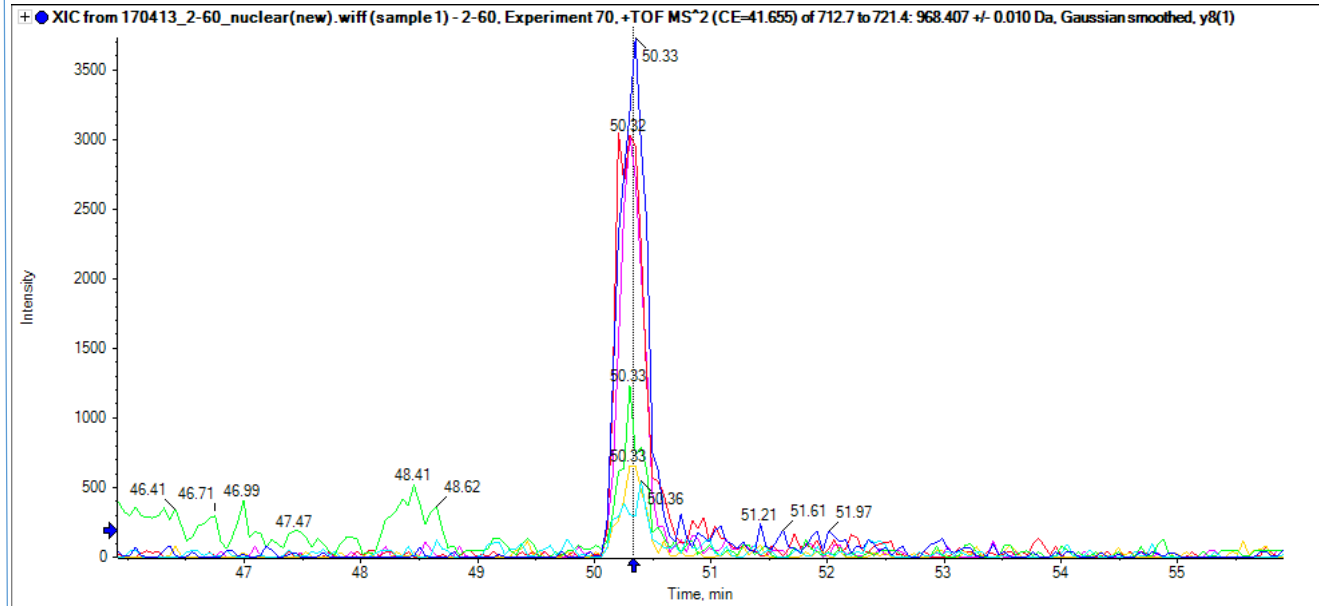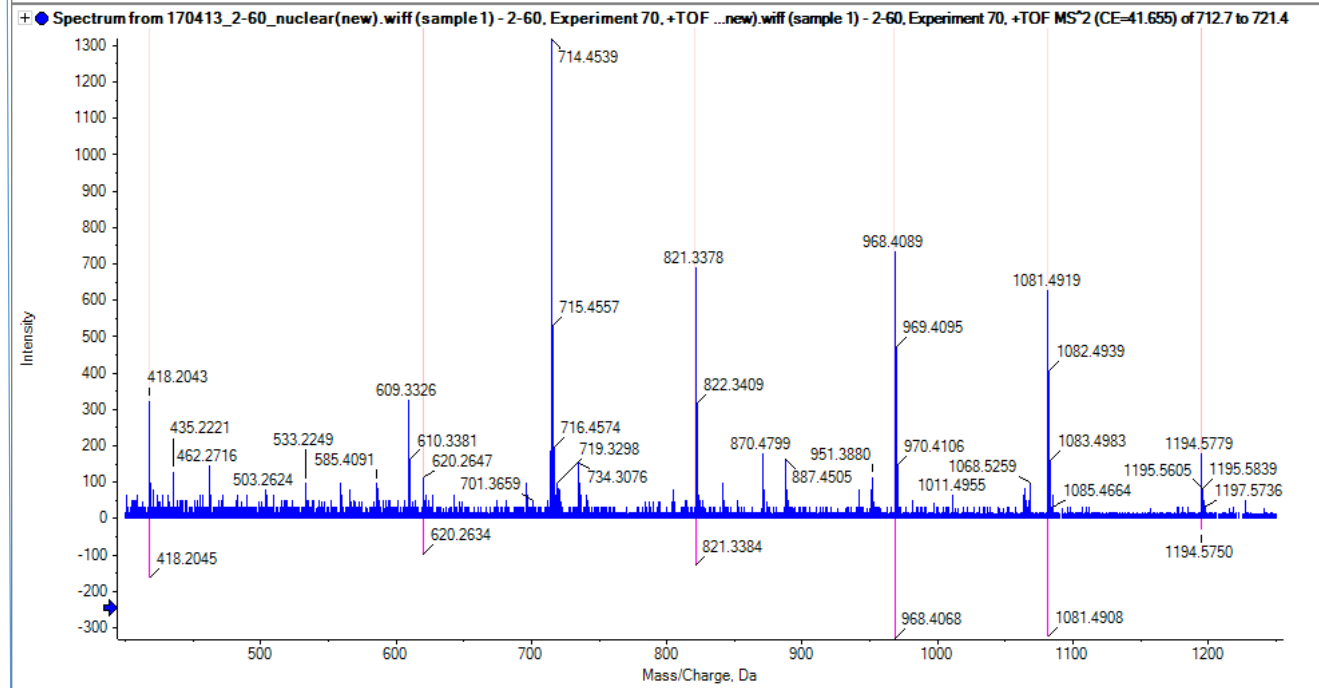

E3 ubiquitin-protein

LLGPSAAADILQLSSSLPLQSR

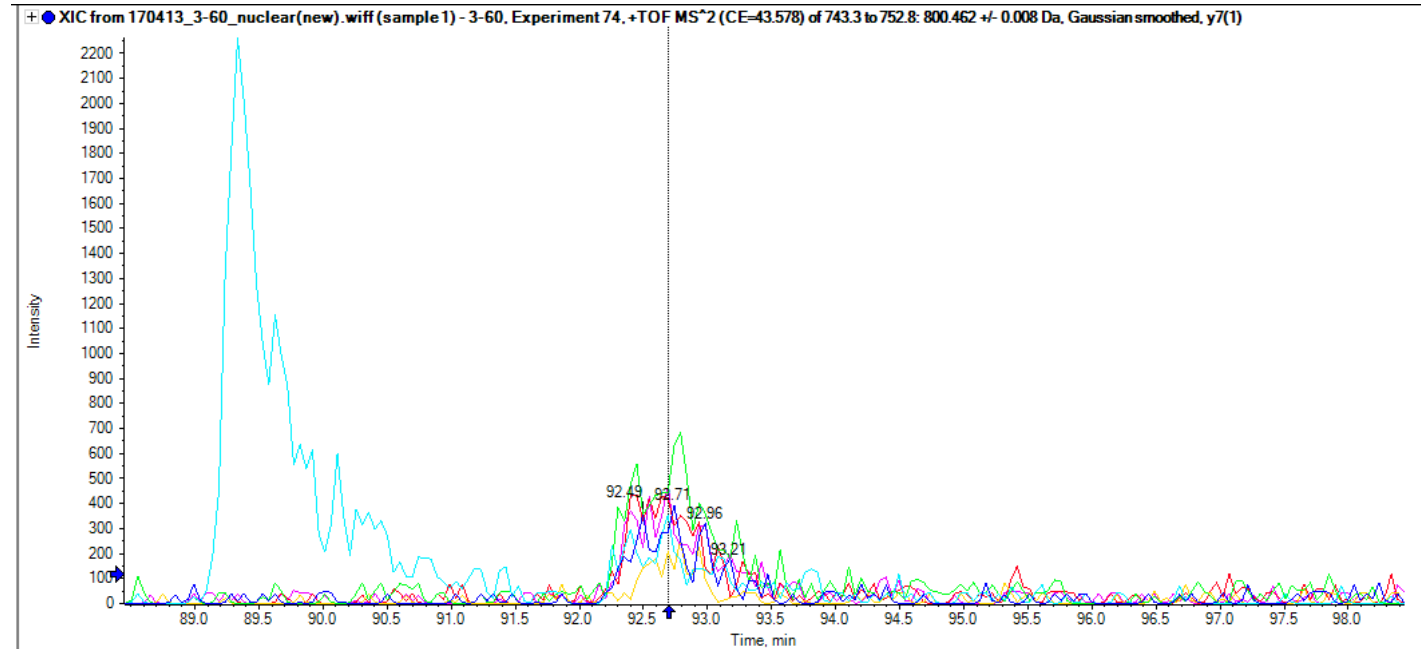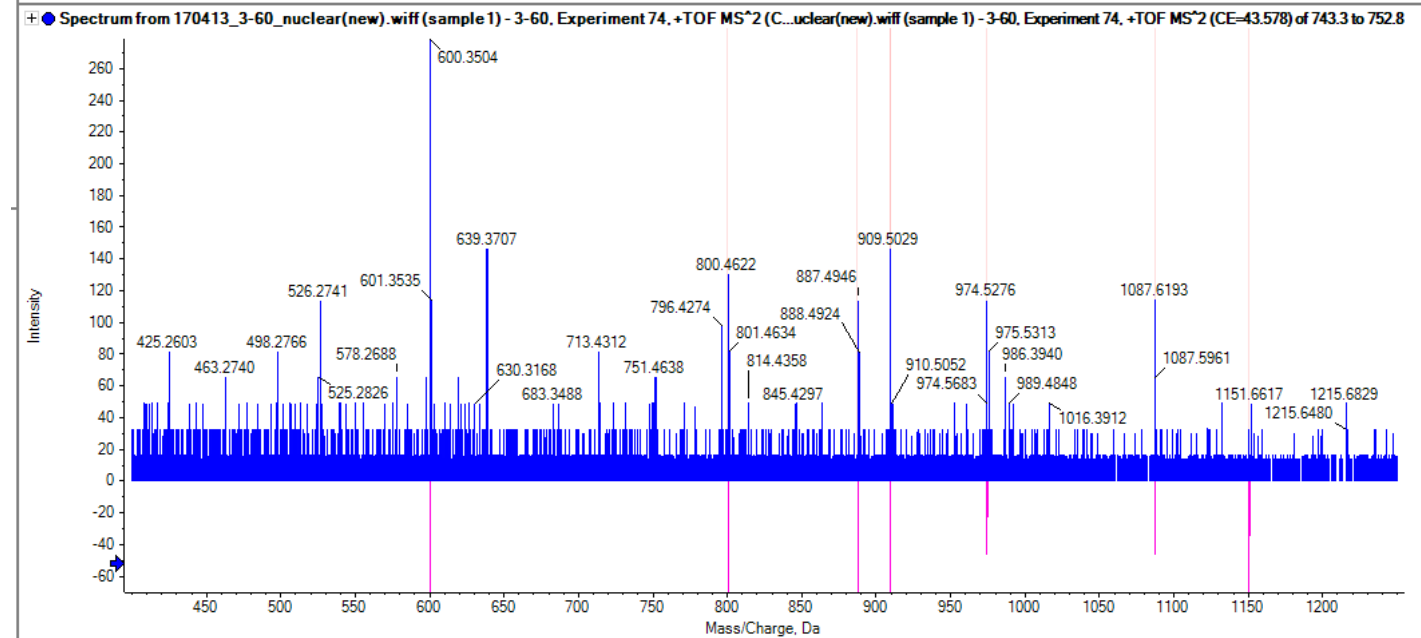

Annexin A1  
GVDEATIIDILTK

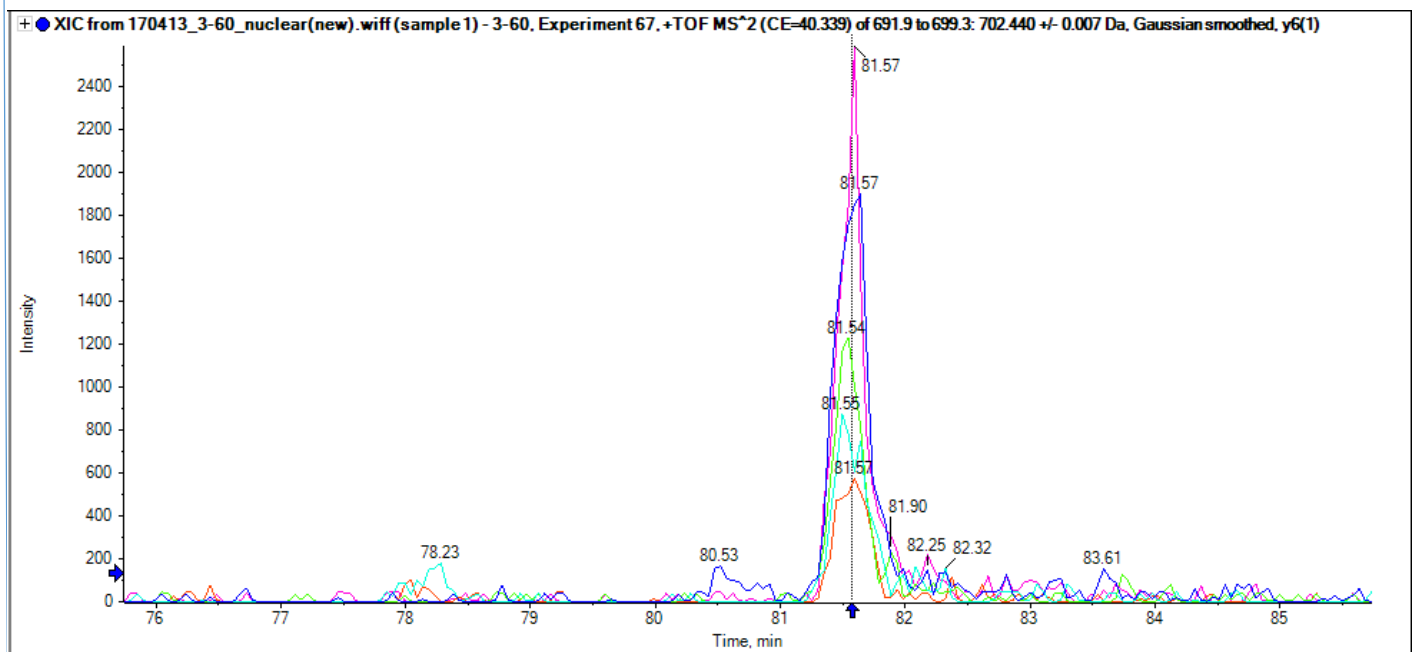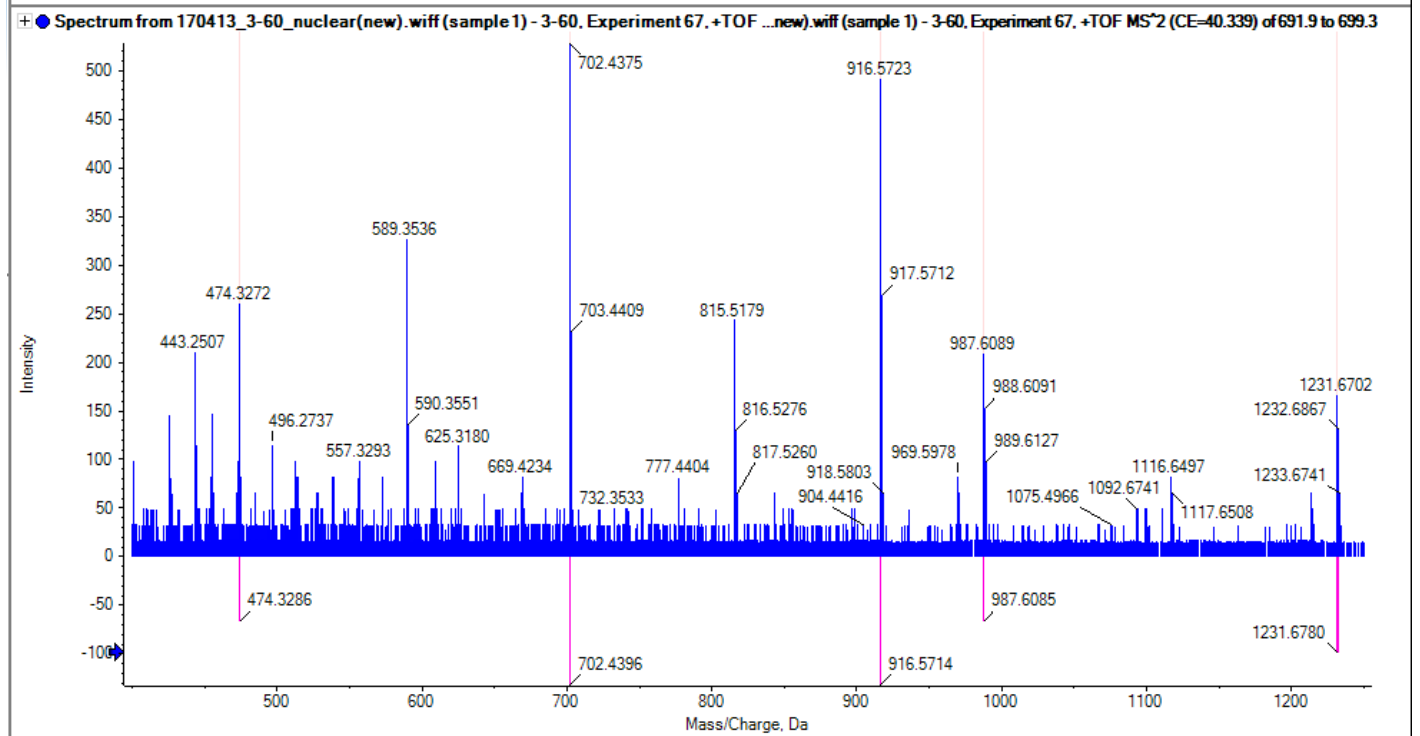

Fibronectin  
GLAFTDVDVDSIK

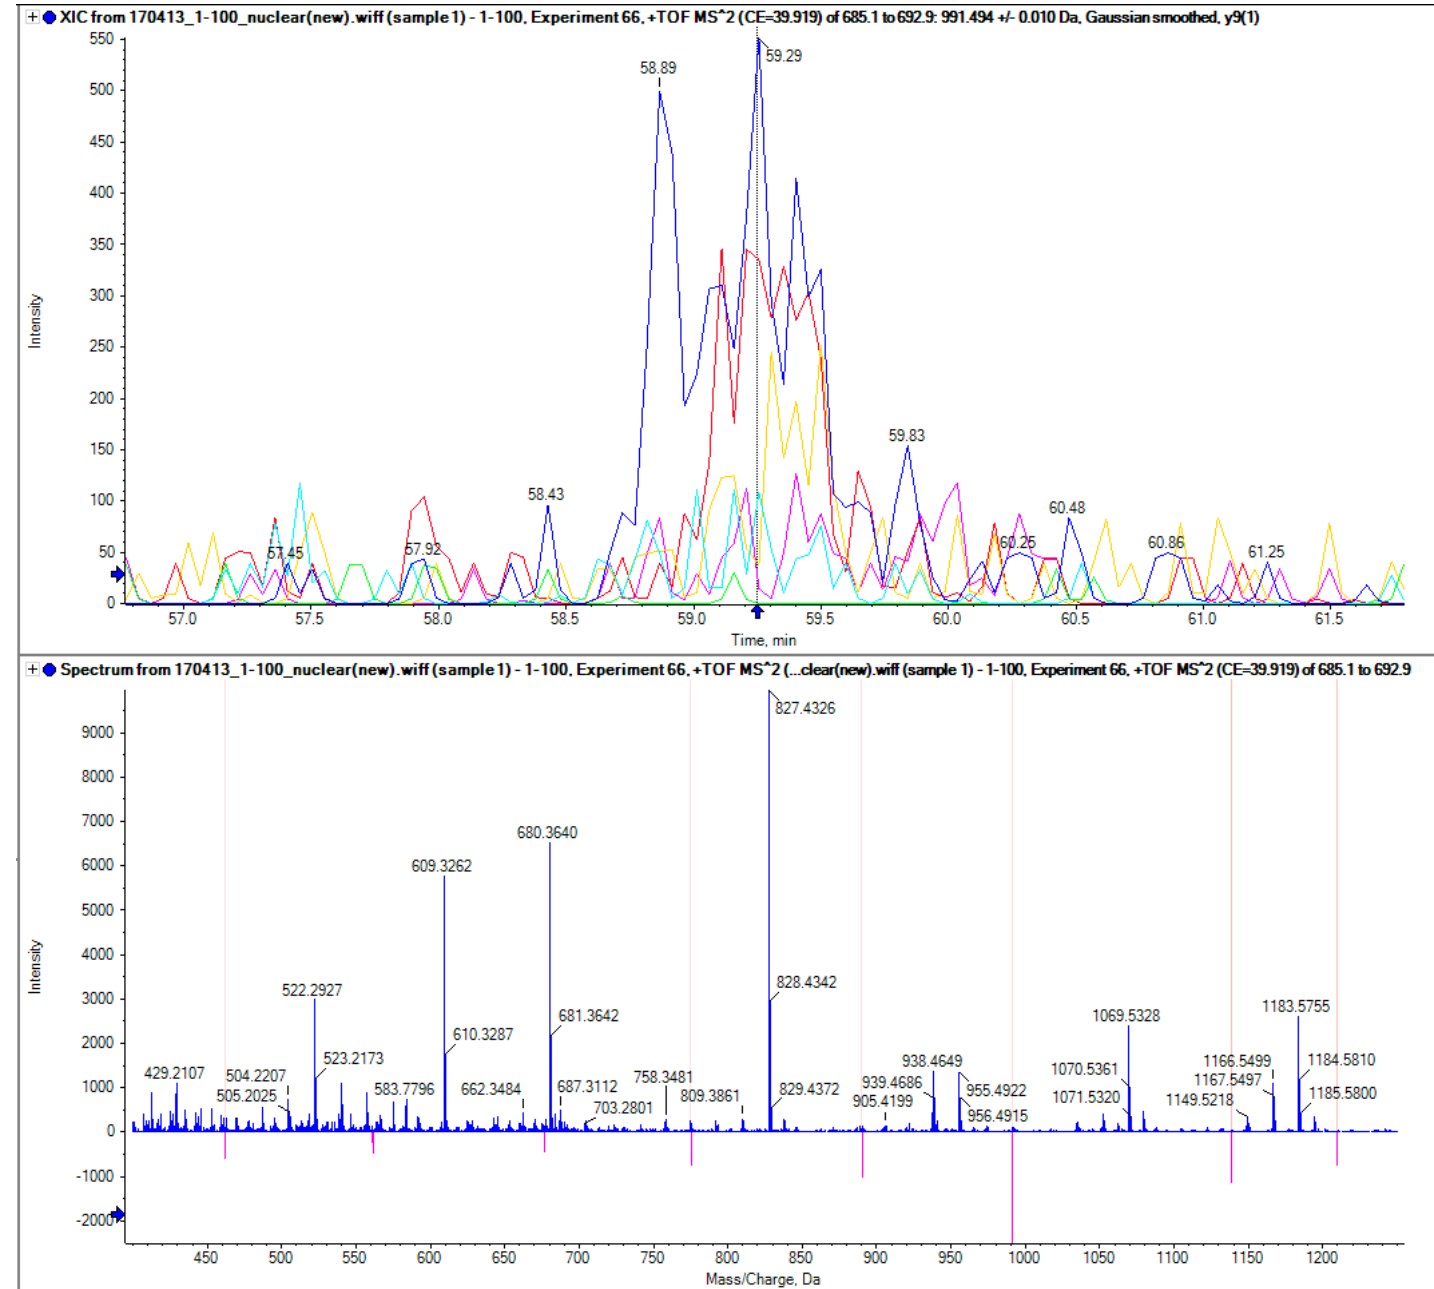

aminopeptidase N  
AQIINDAFNLASAHK

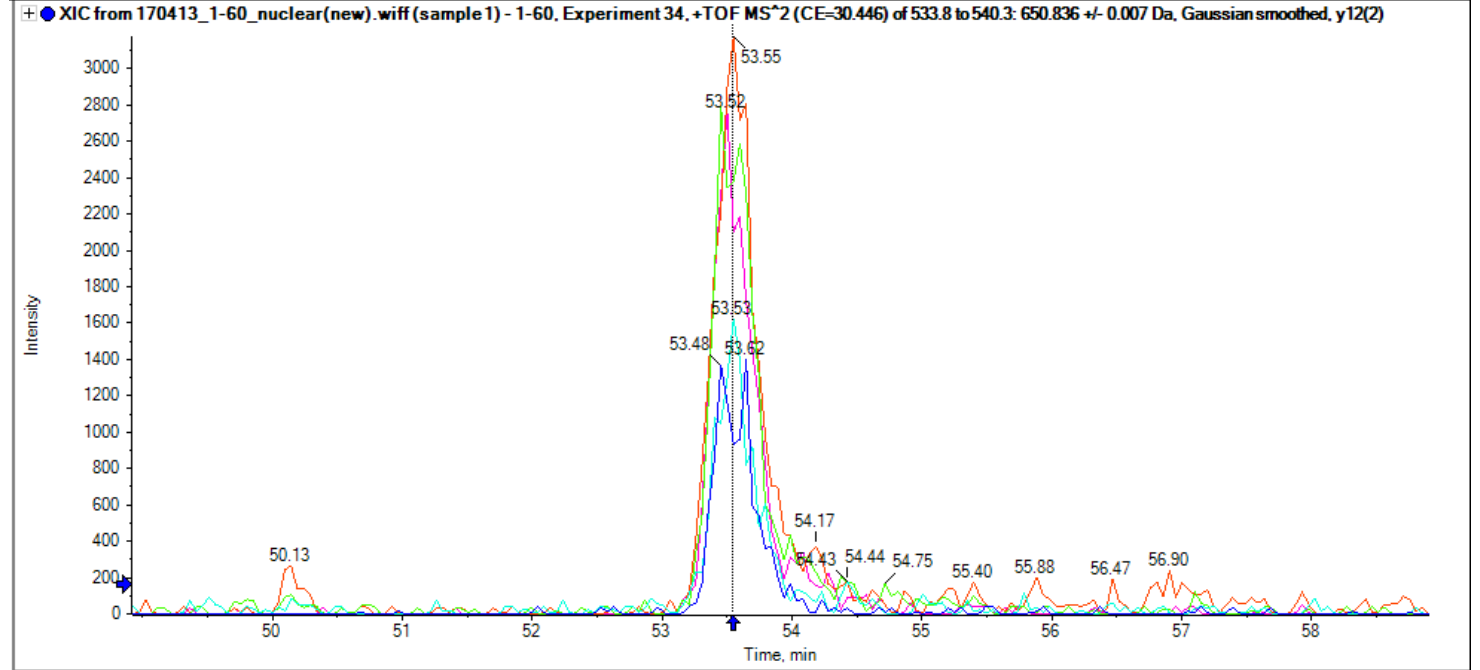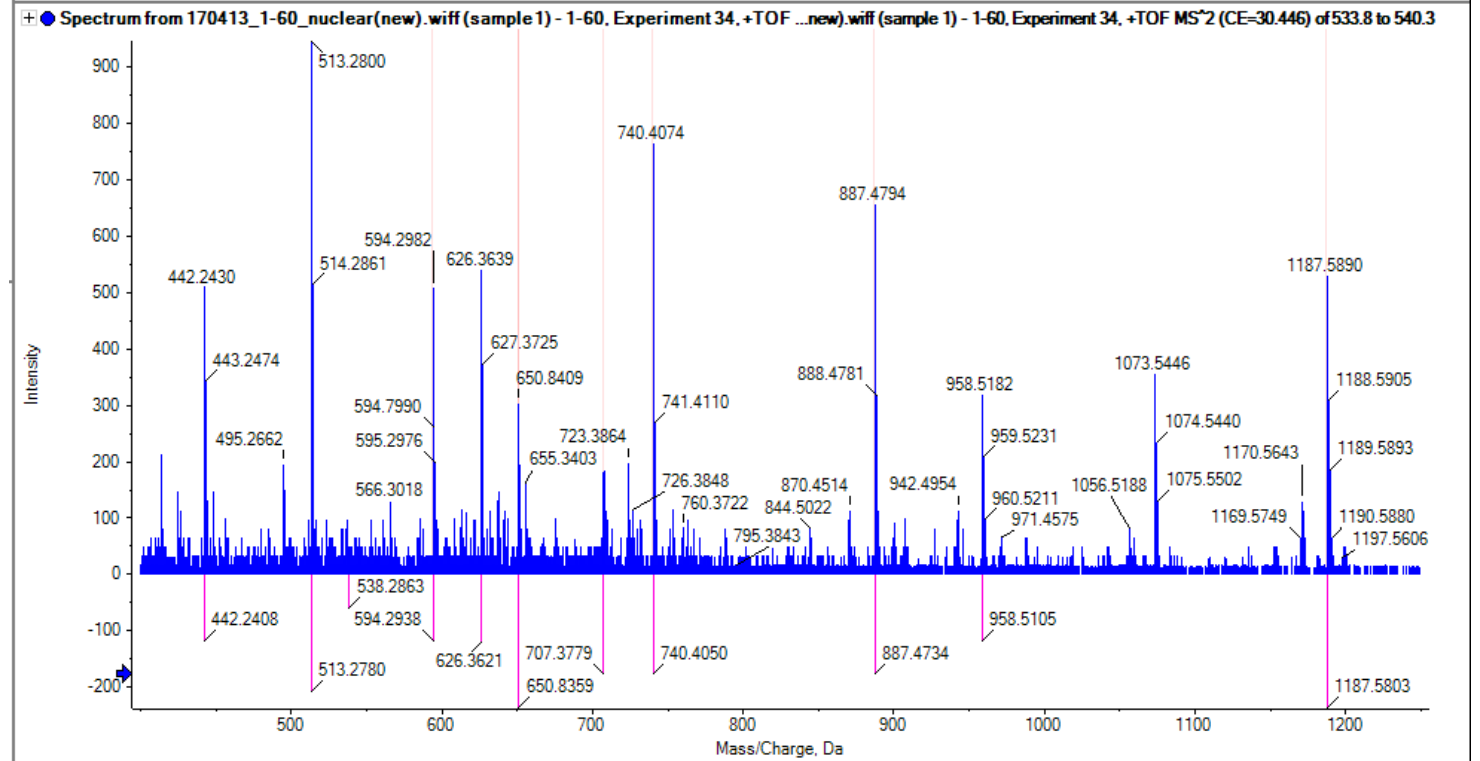



High mobility group protein B2  
SEHPGLSIGDTAK

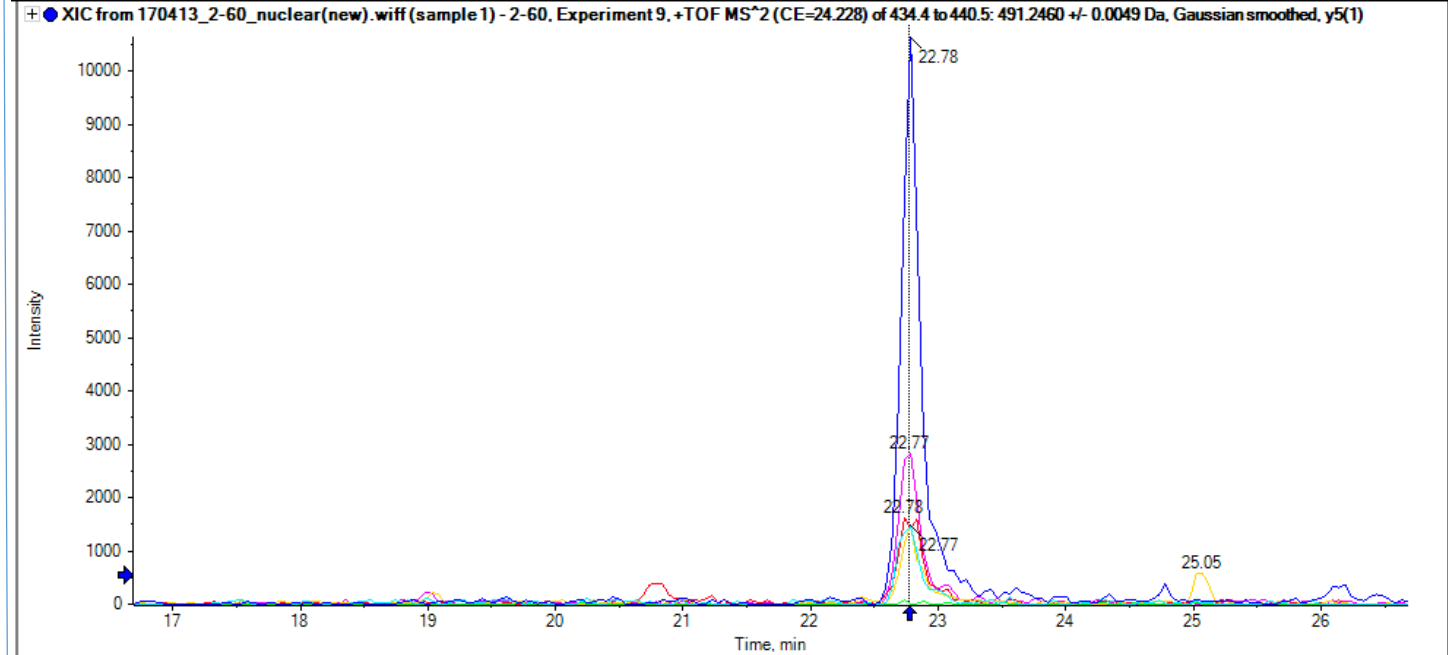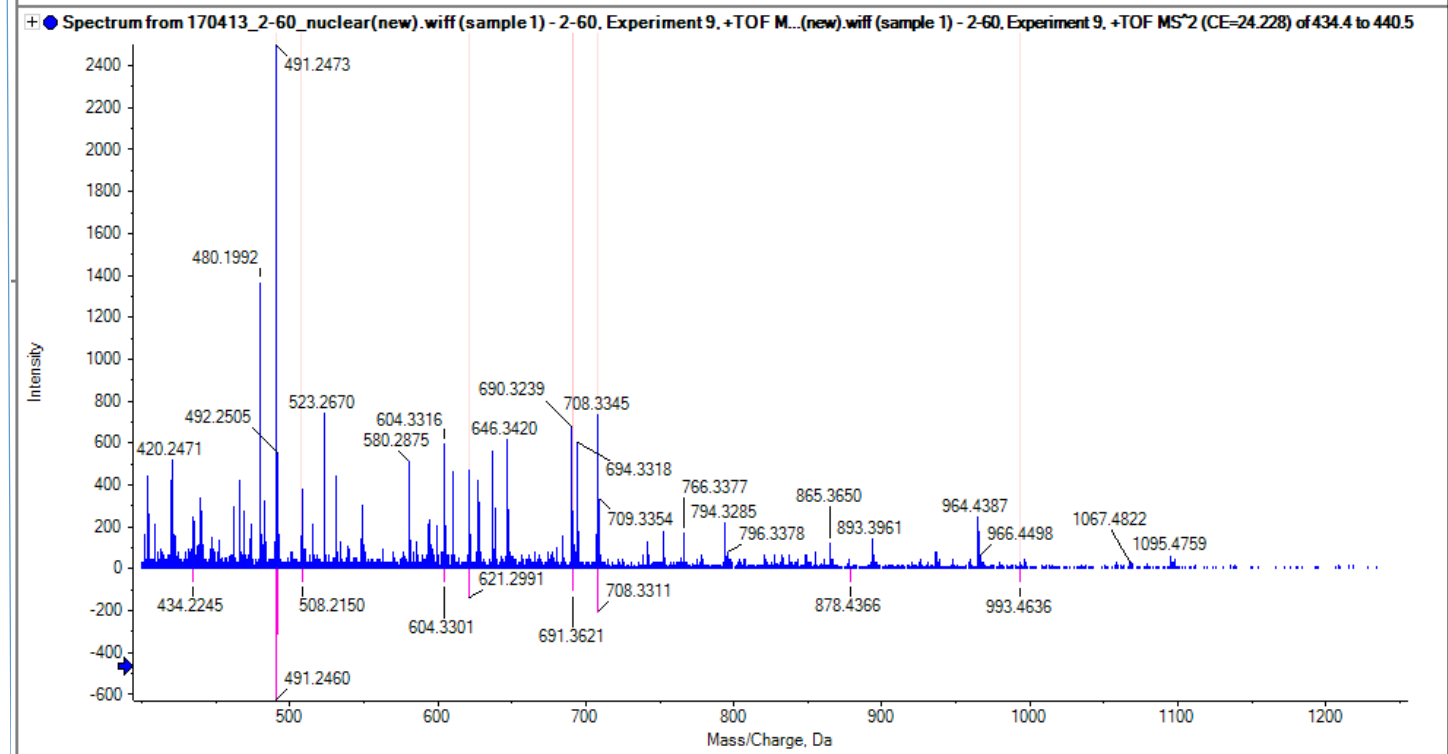

Nucleophosmin  
MTDQEAIQDLWQWR

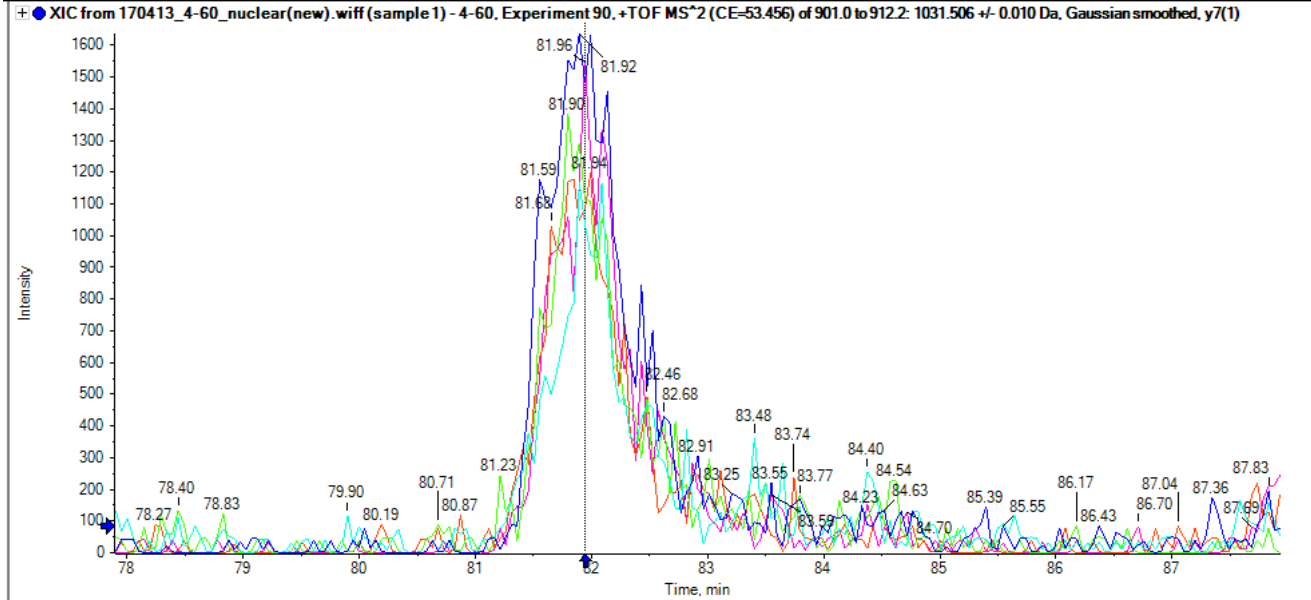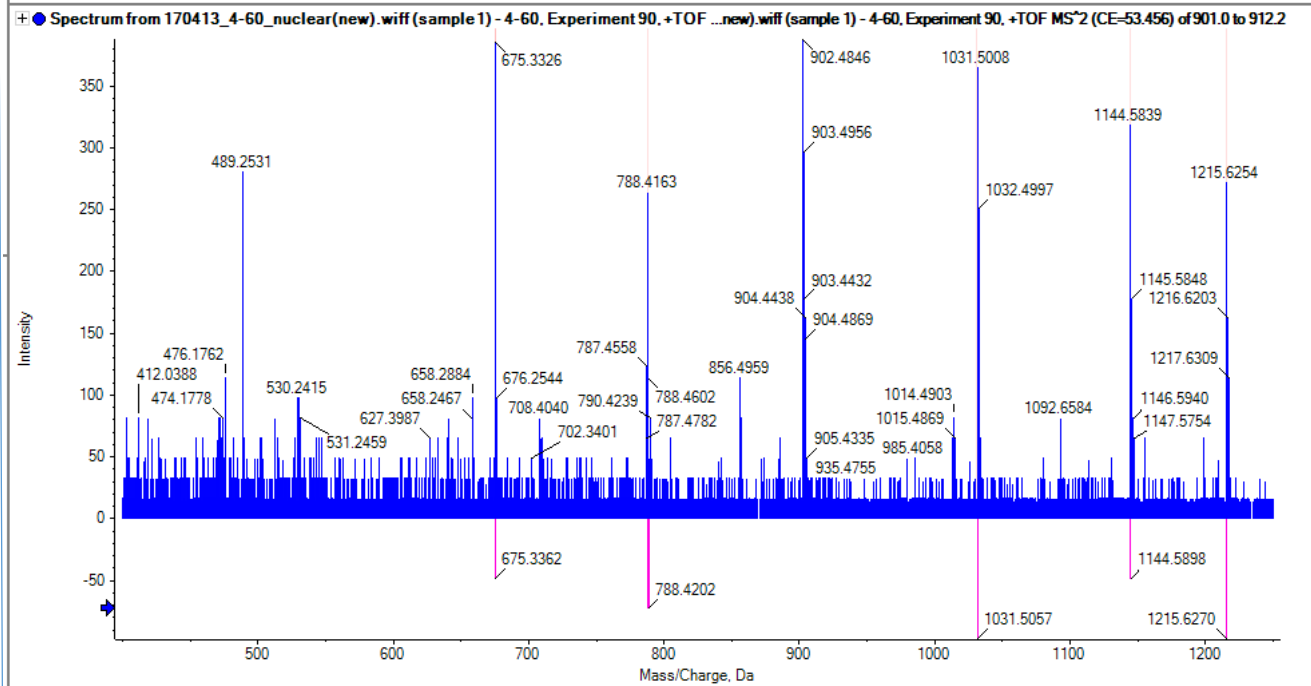

Elongation factor 1-beta  
SIQADGLVWGSSK

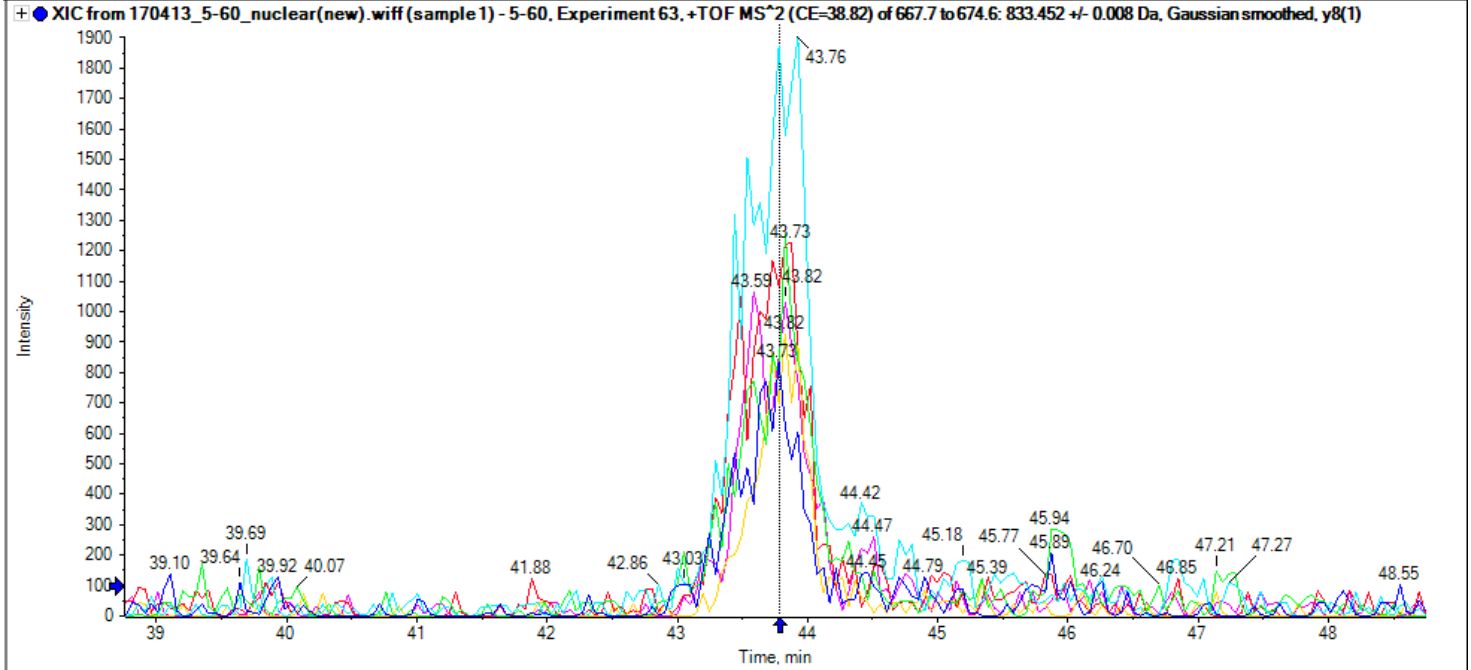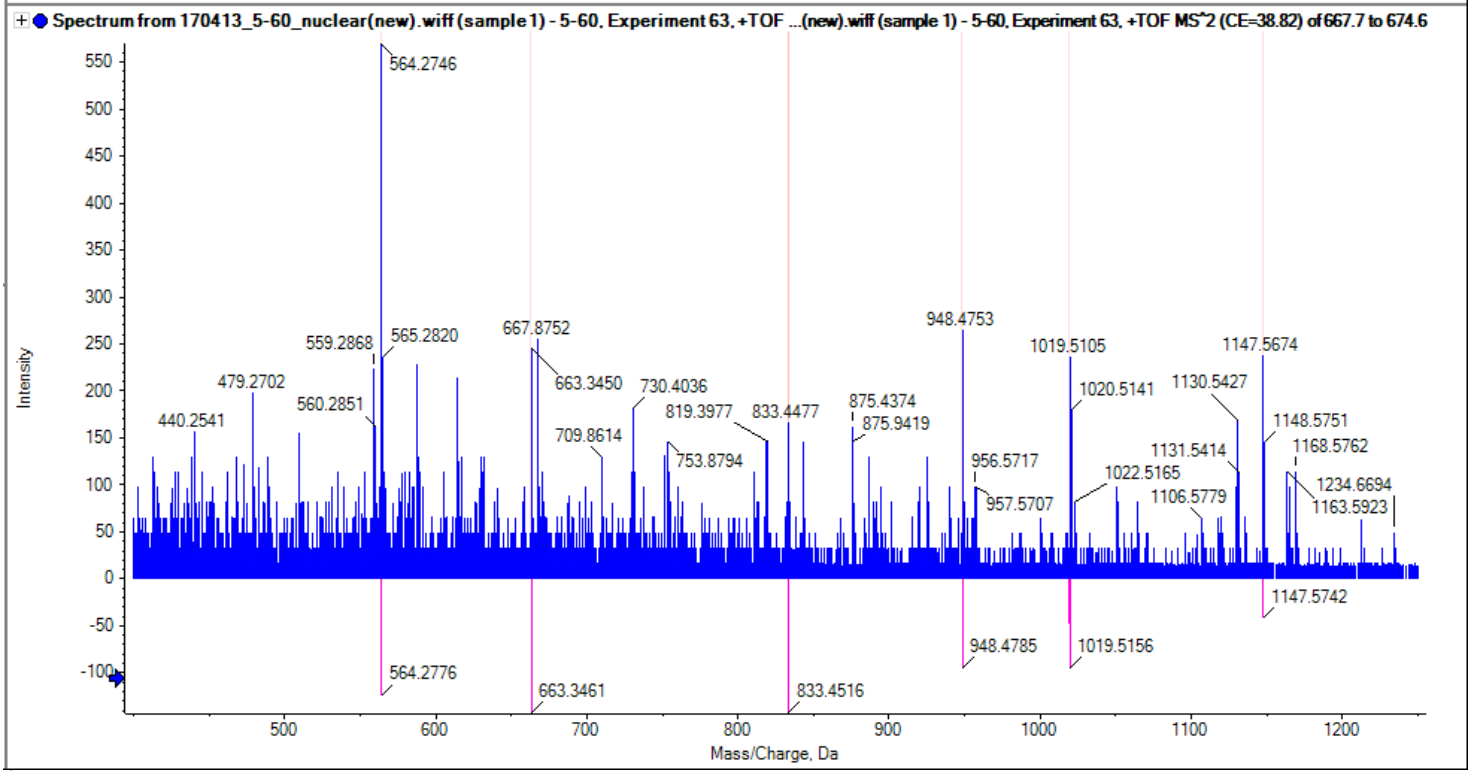

Synaptogyrin-4  
SLQELANSEAVQFLR

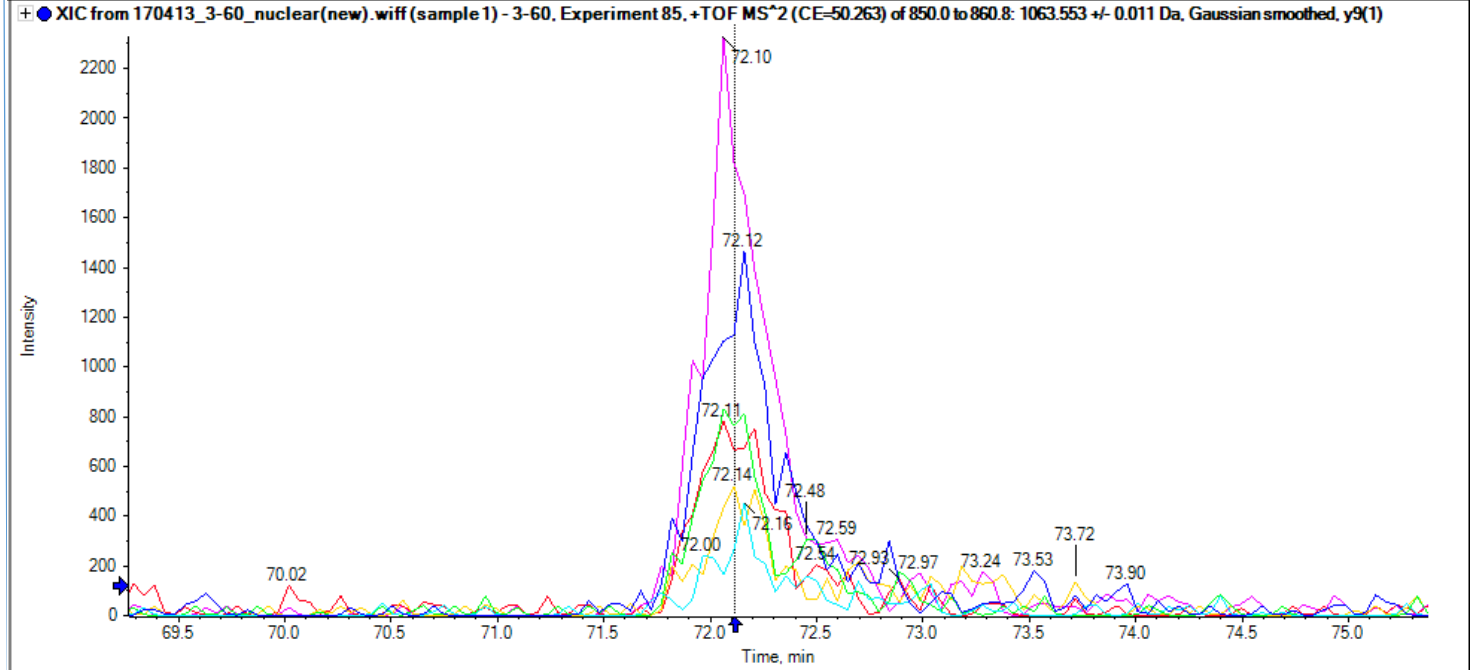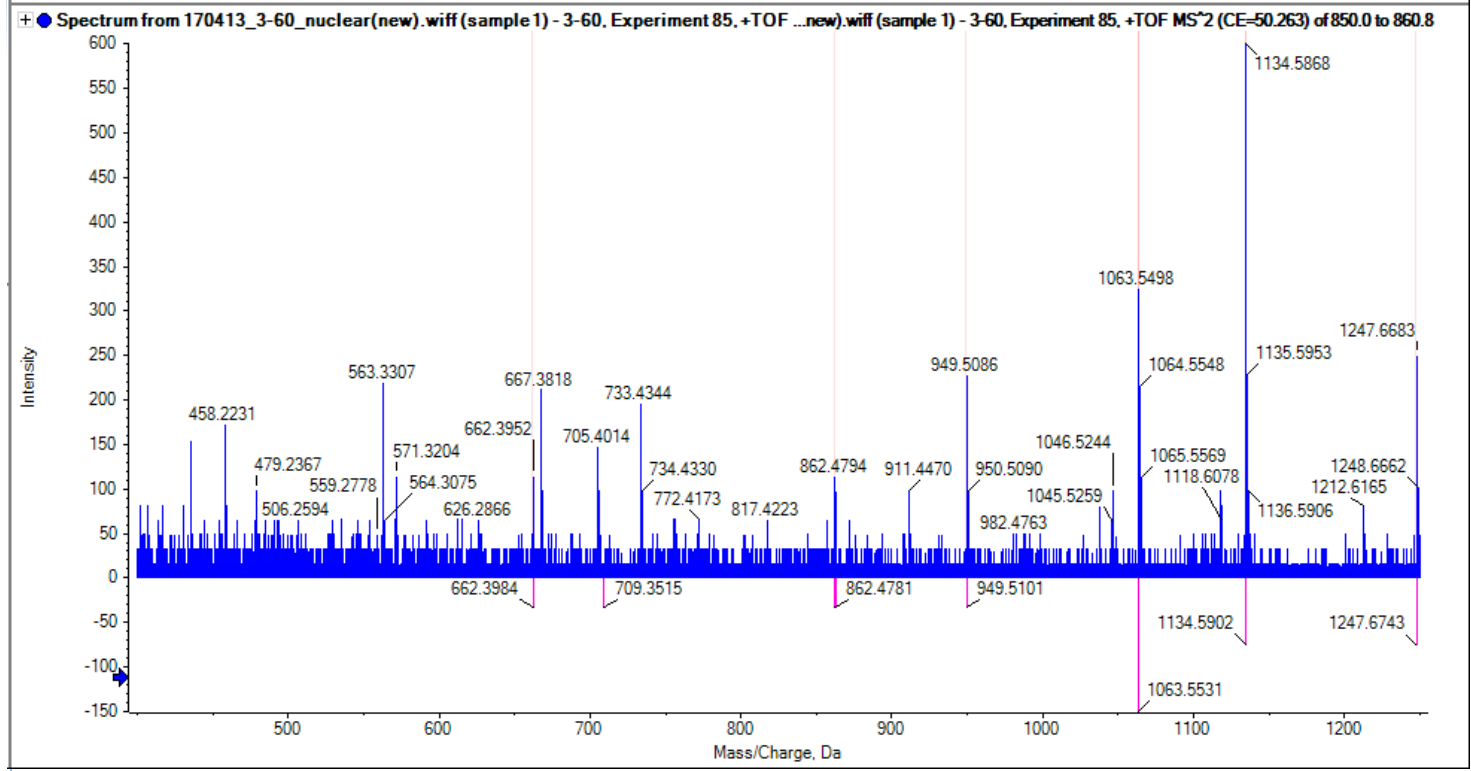

# Cathelicidin antimicrobial peptide FALLGDFFR

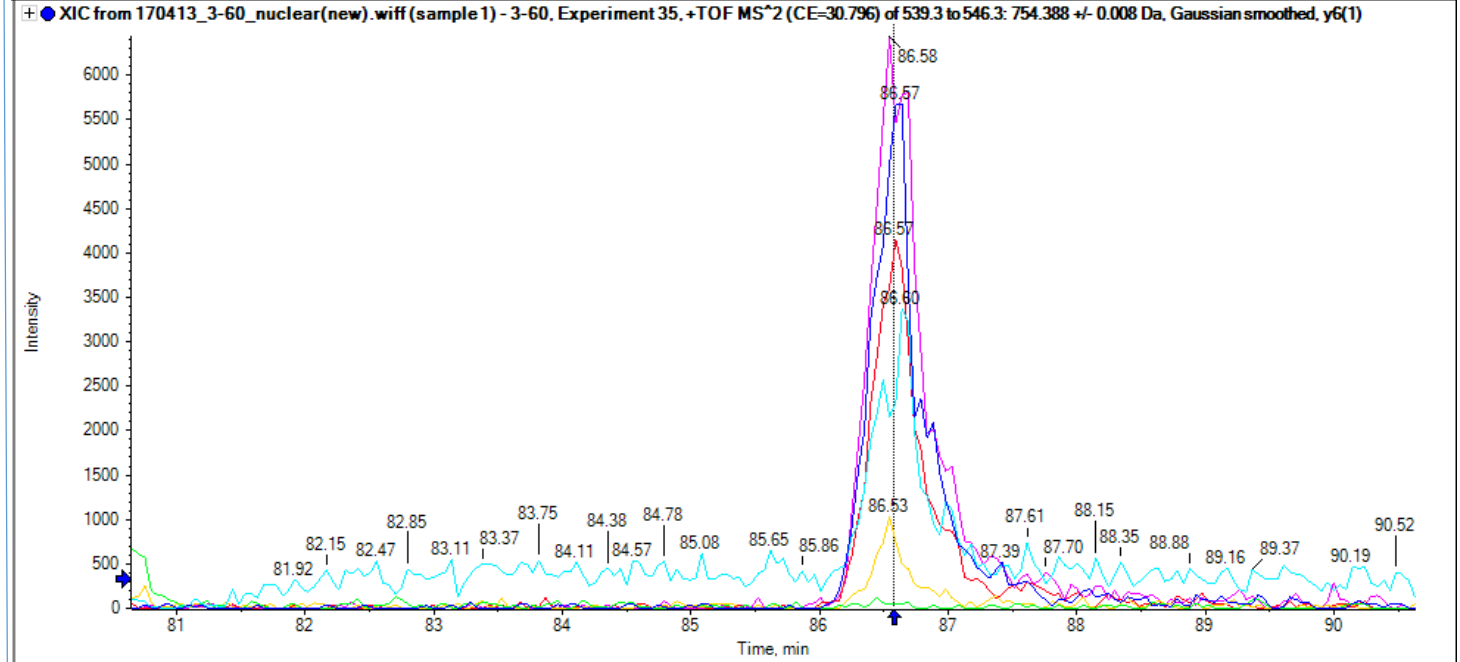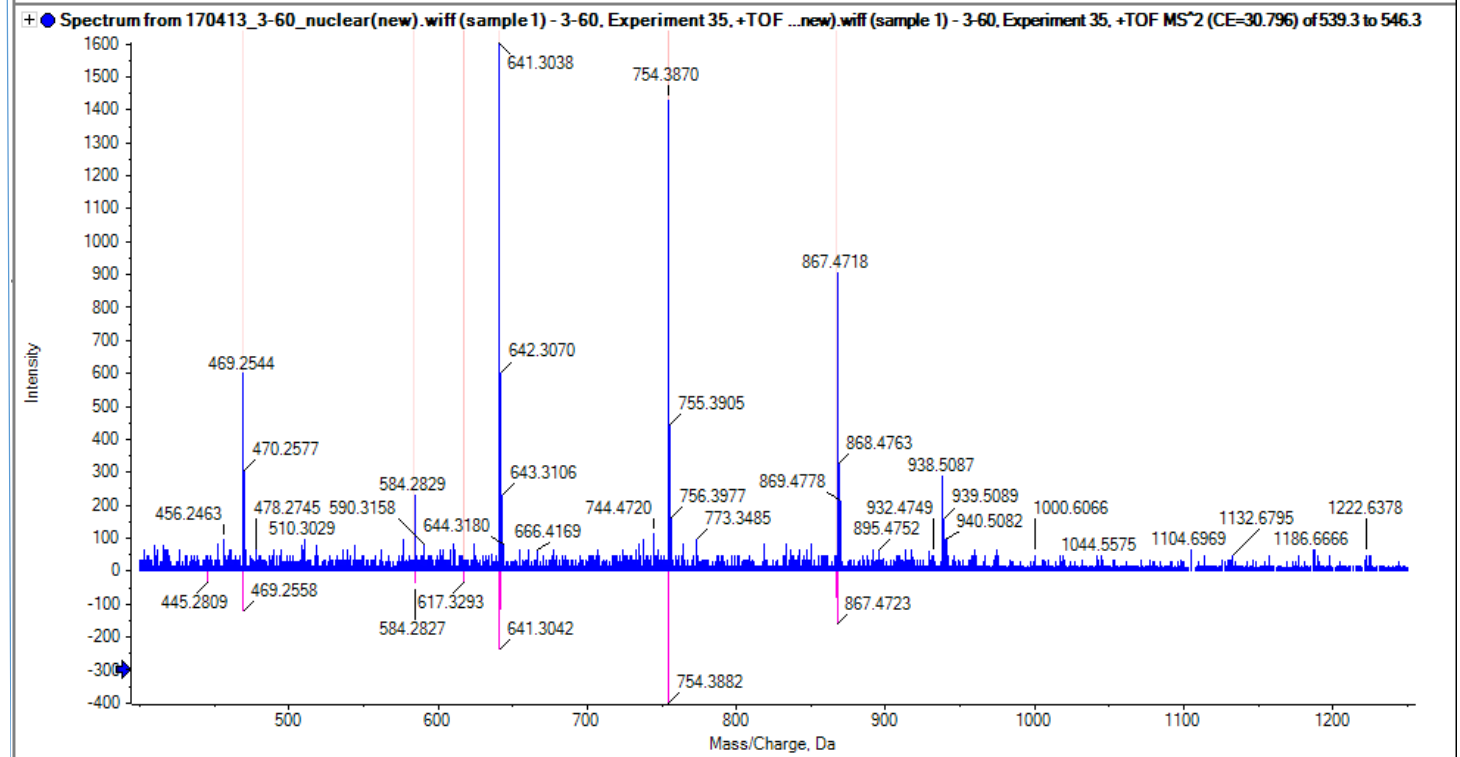

# Enoyl-CoA hydratase SLAMEMVLTGDR

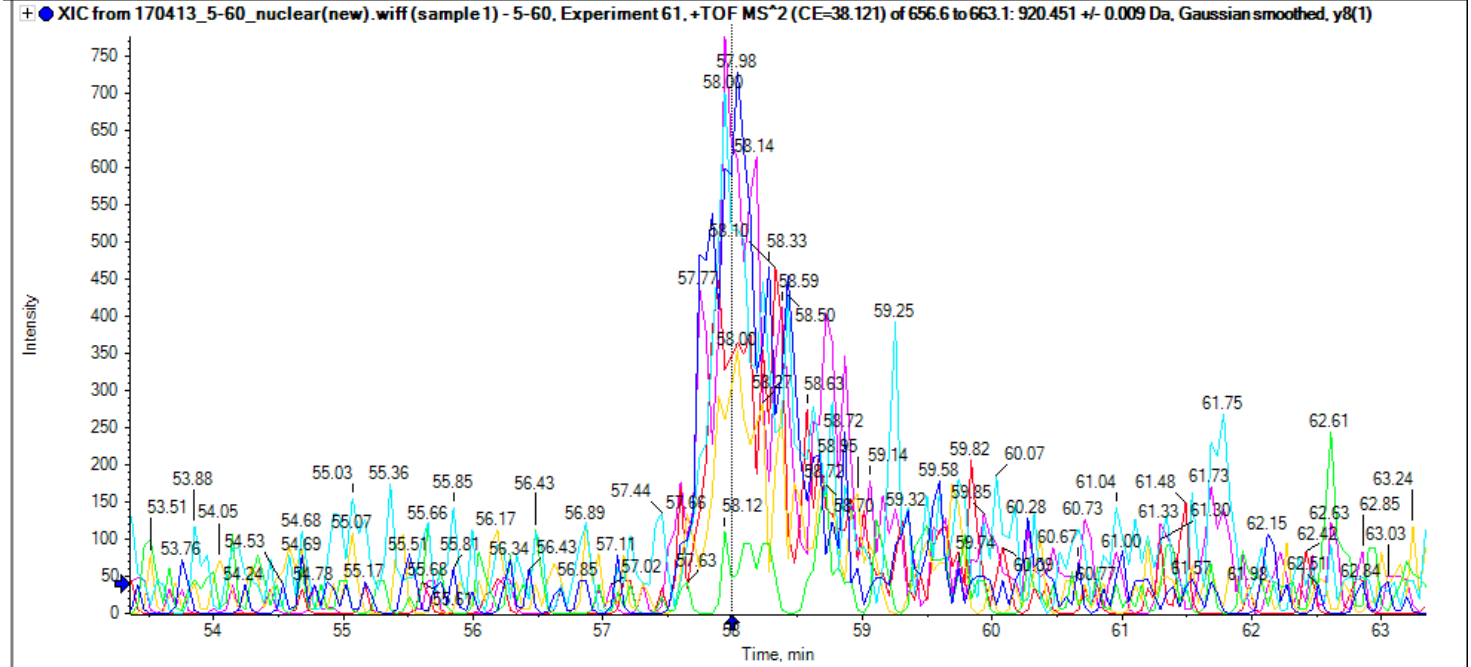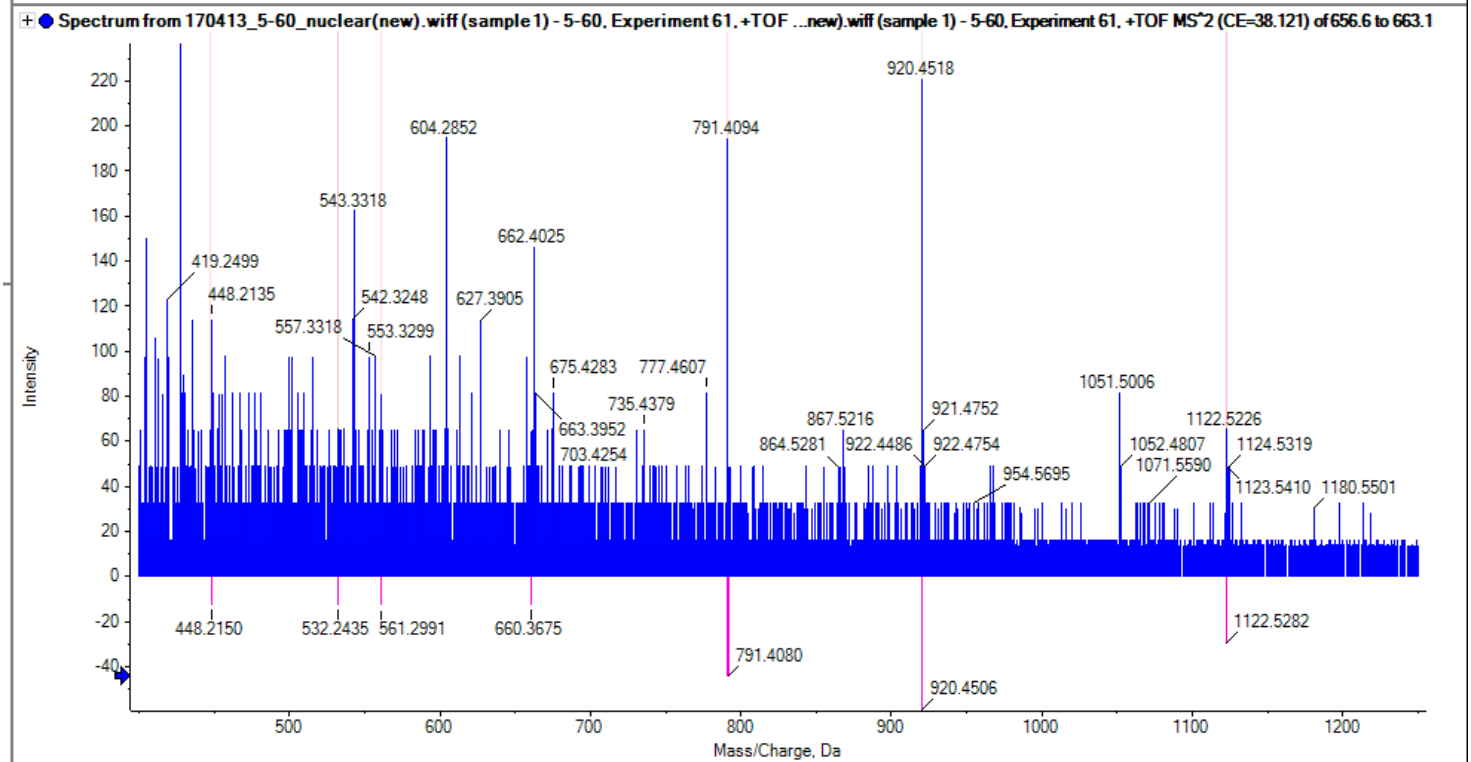

Single-stranded DNA-binding protein  
RQATTIADNIIFLSDQTK

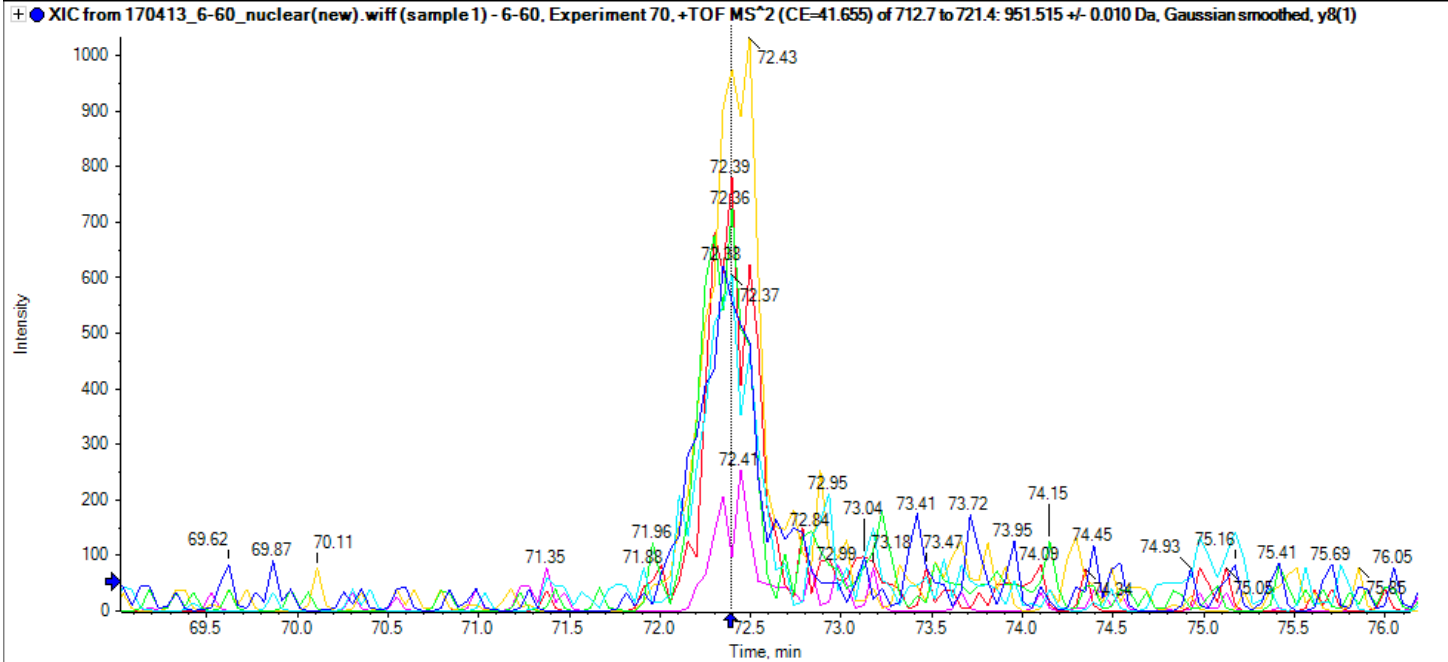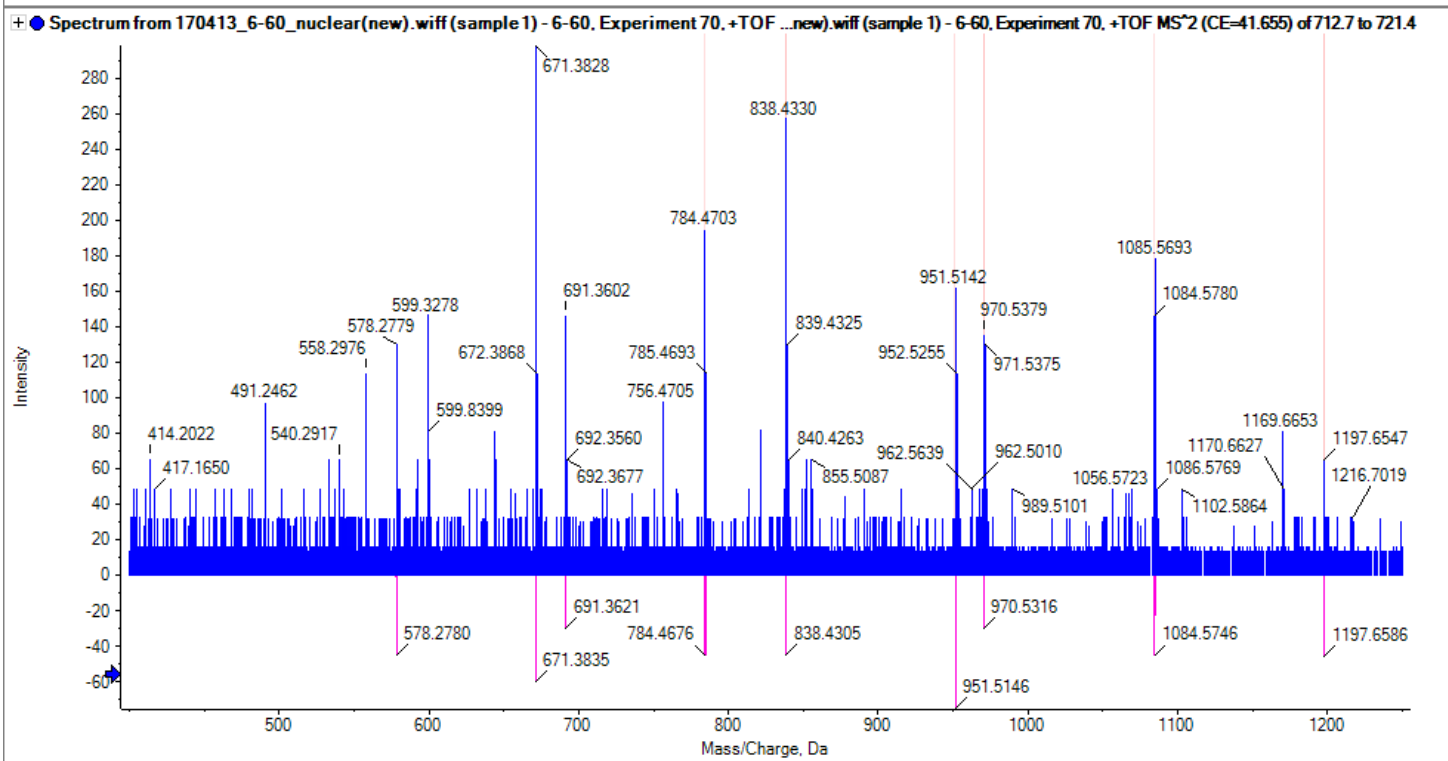

# Isoform 2 of Annexin A2 SYSPYDMLESIR

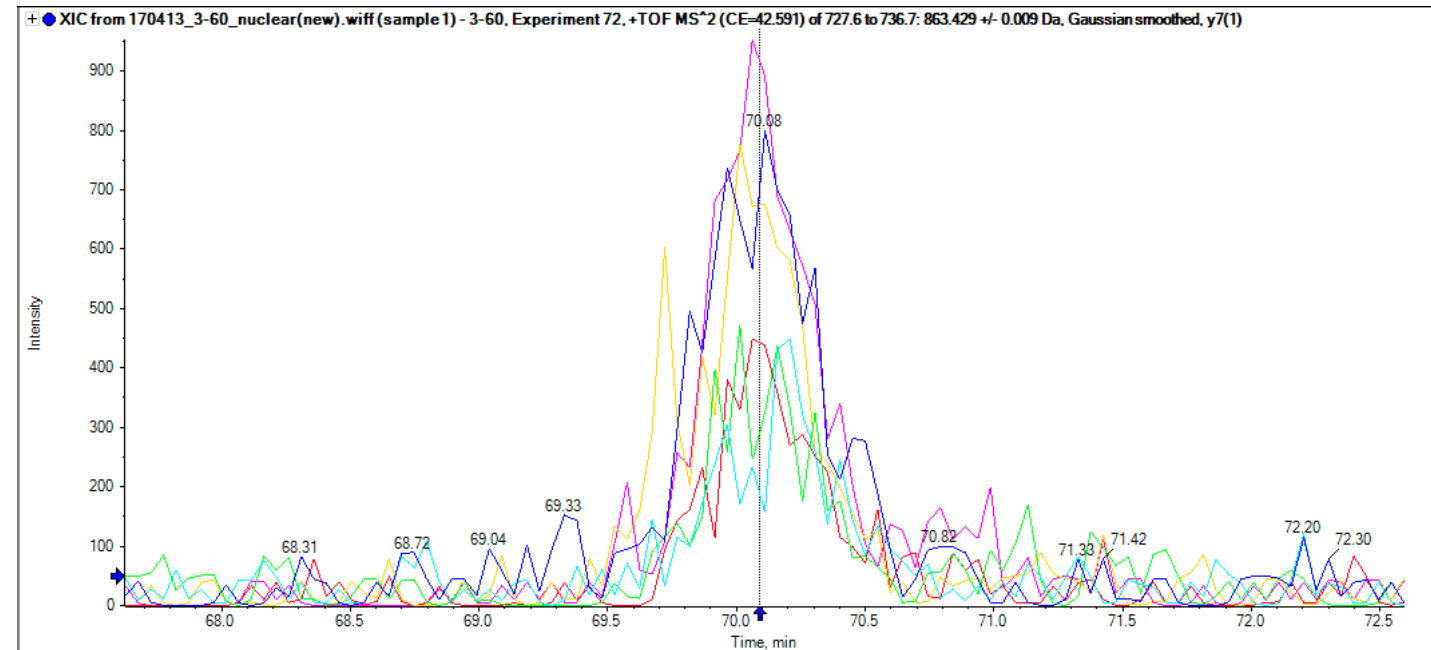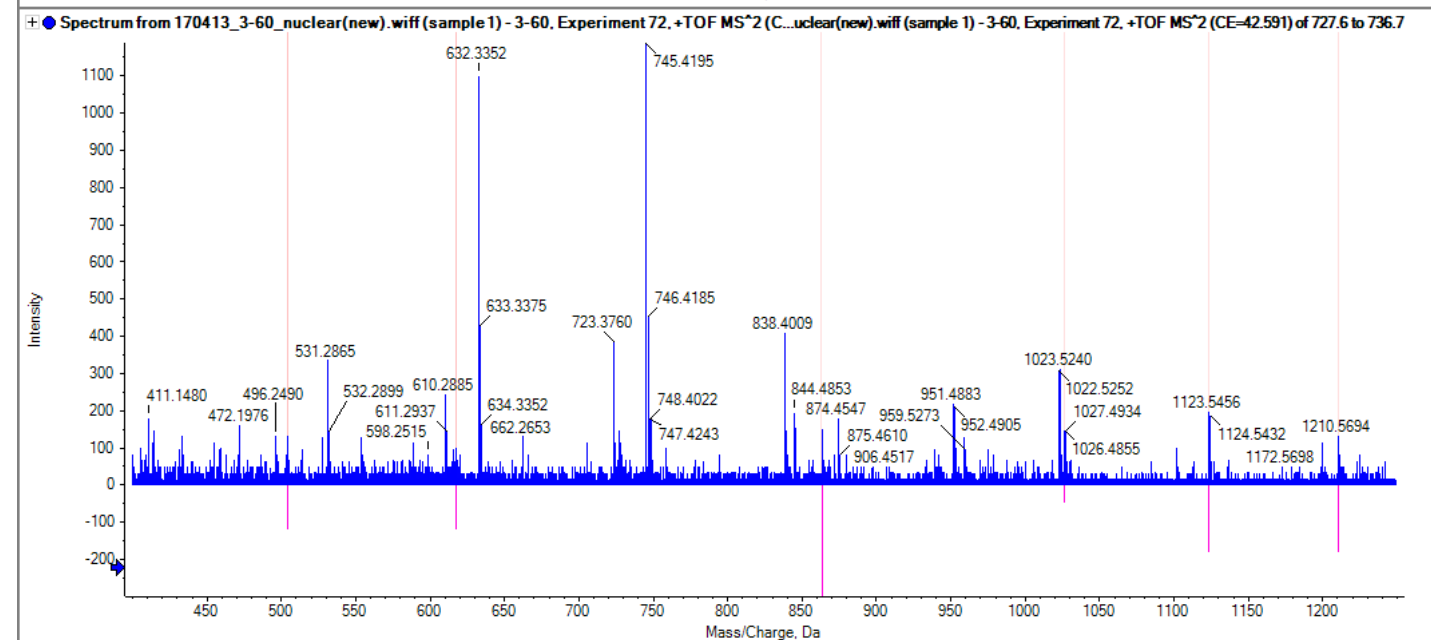



Junction plakoglobin  
SAIVHLINTQDDAELATR

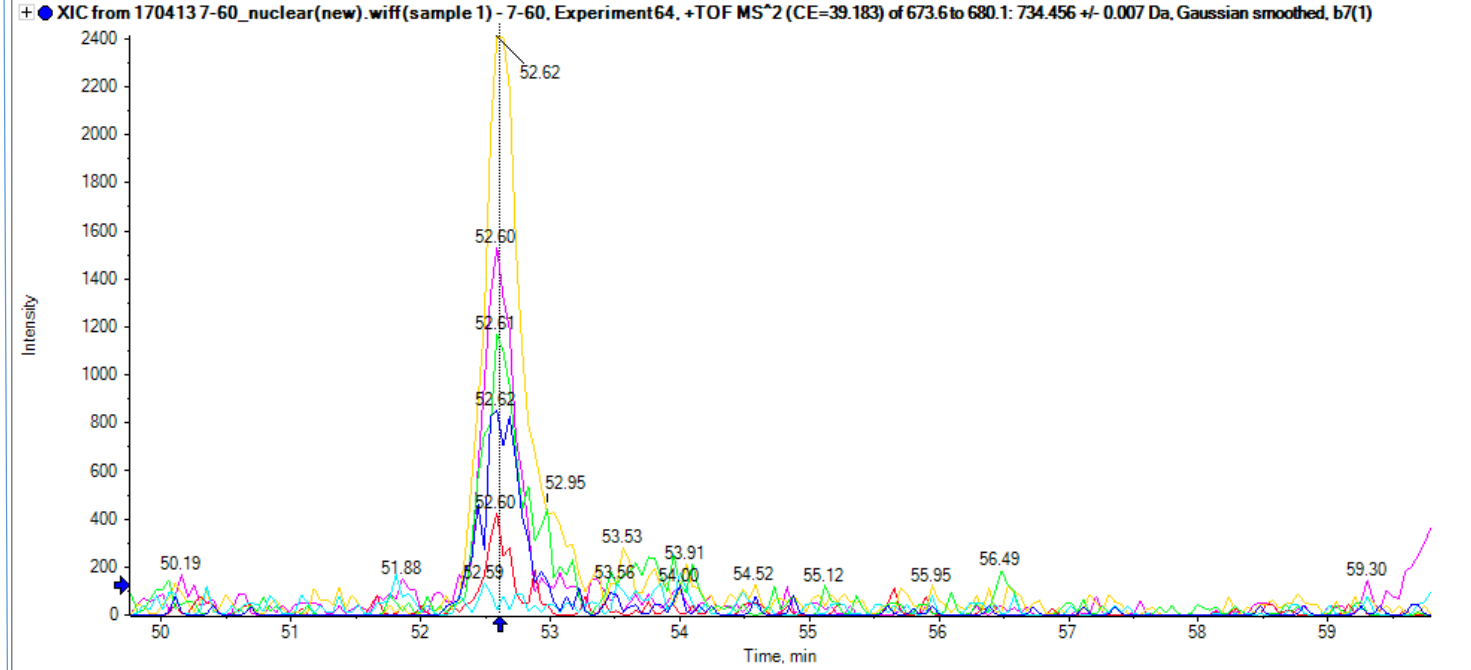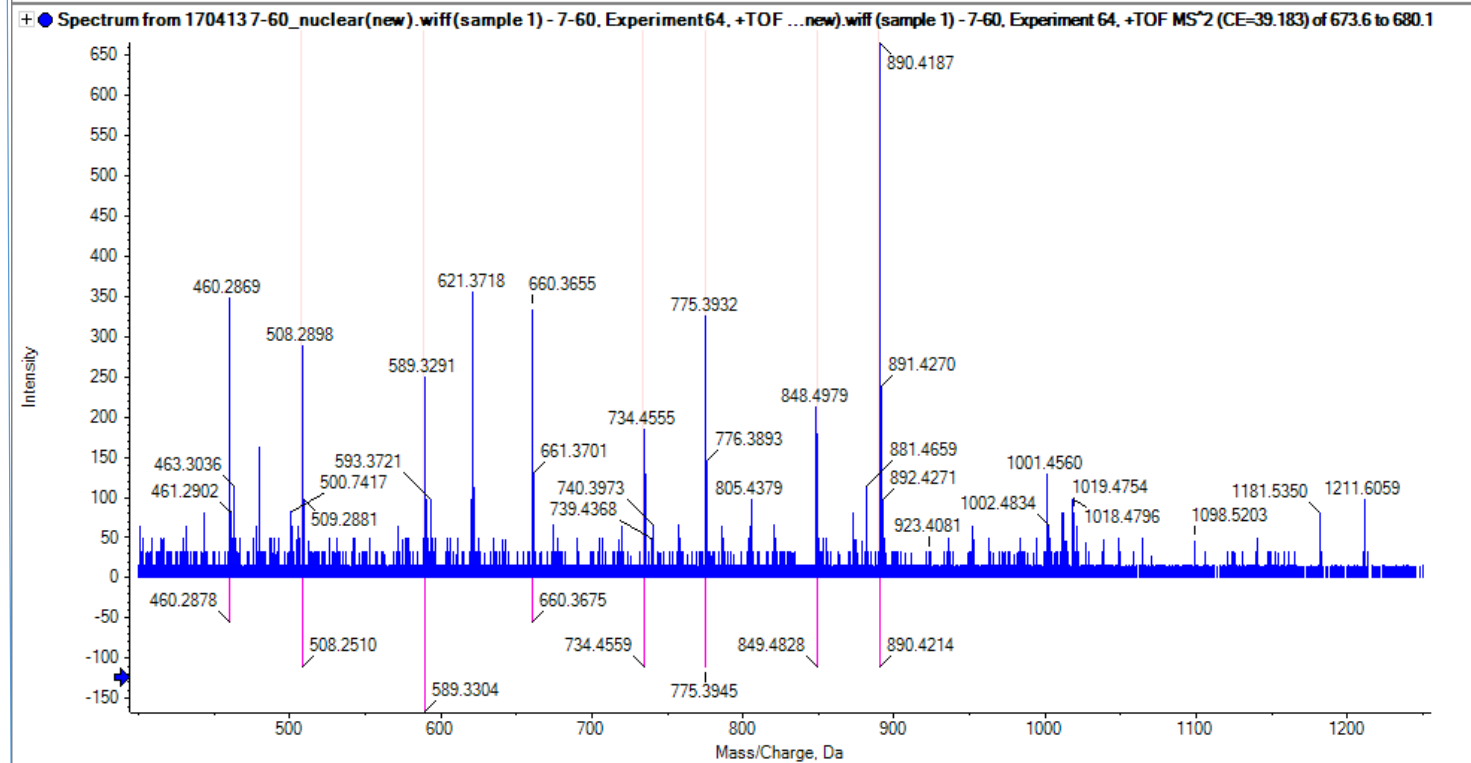

60S ribosomal protein L3  
LEQQVPVNQVFGQDEMIDVIGVTK

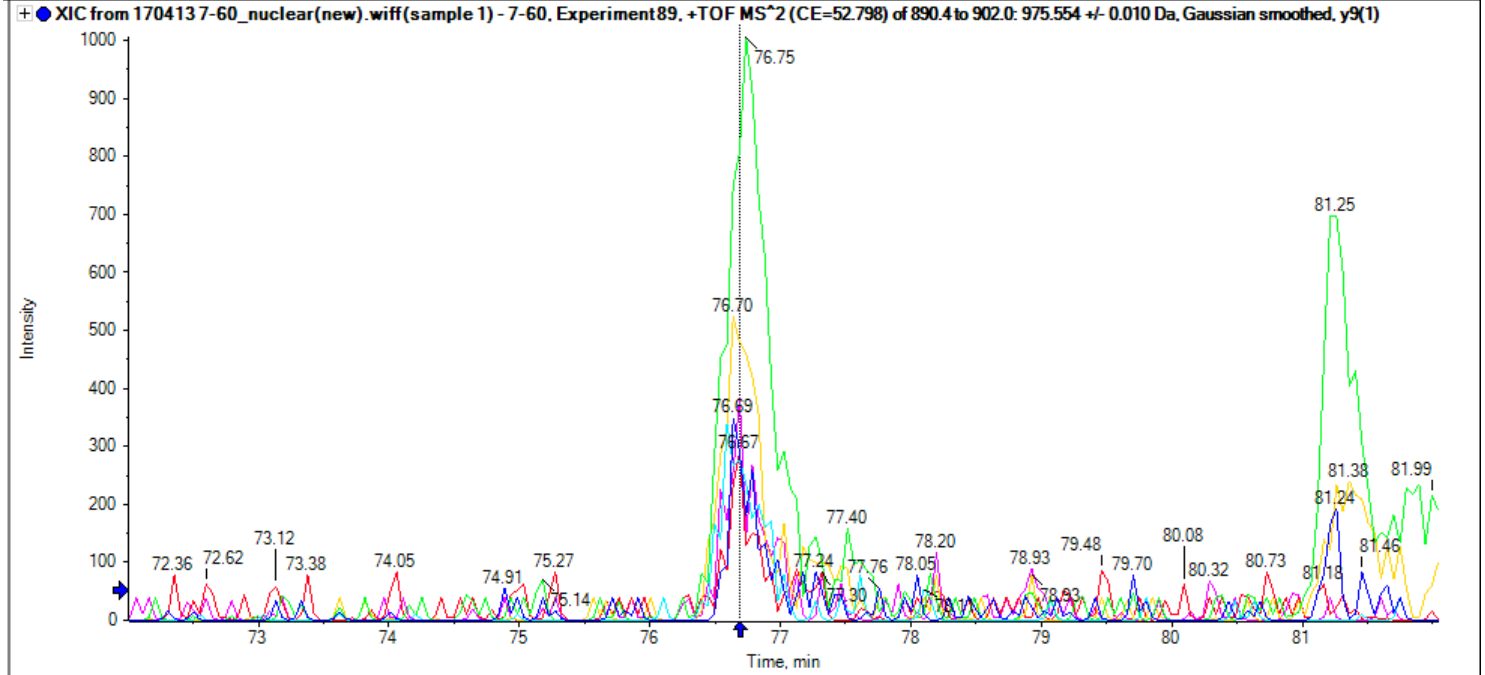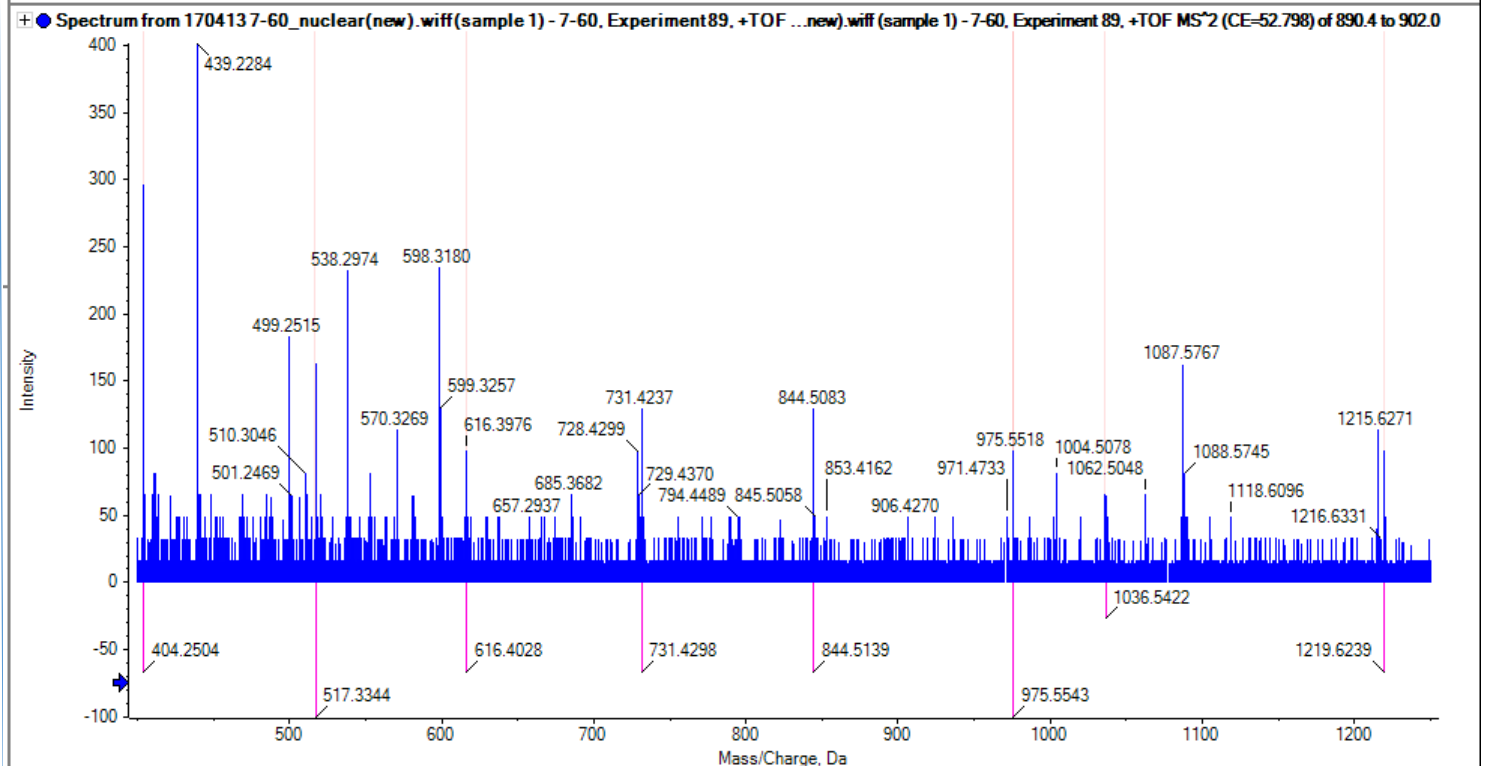

Keratin, type I cytoskeletal 17  
ILTATVDNANILLQIDNAR

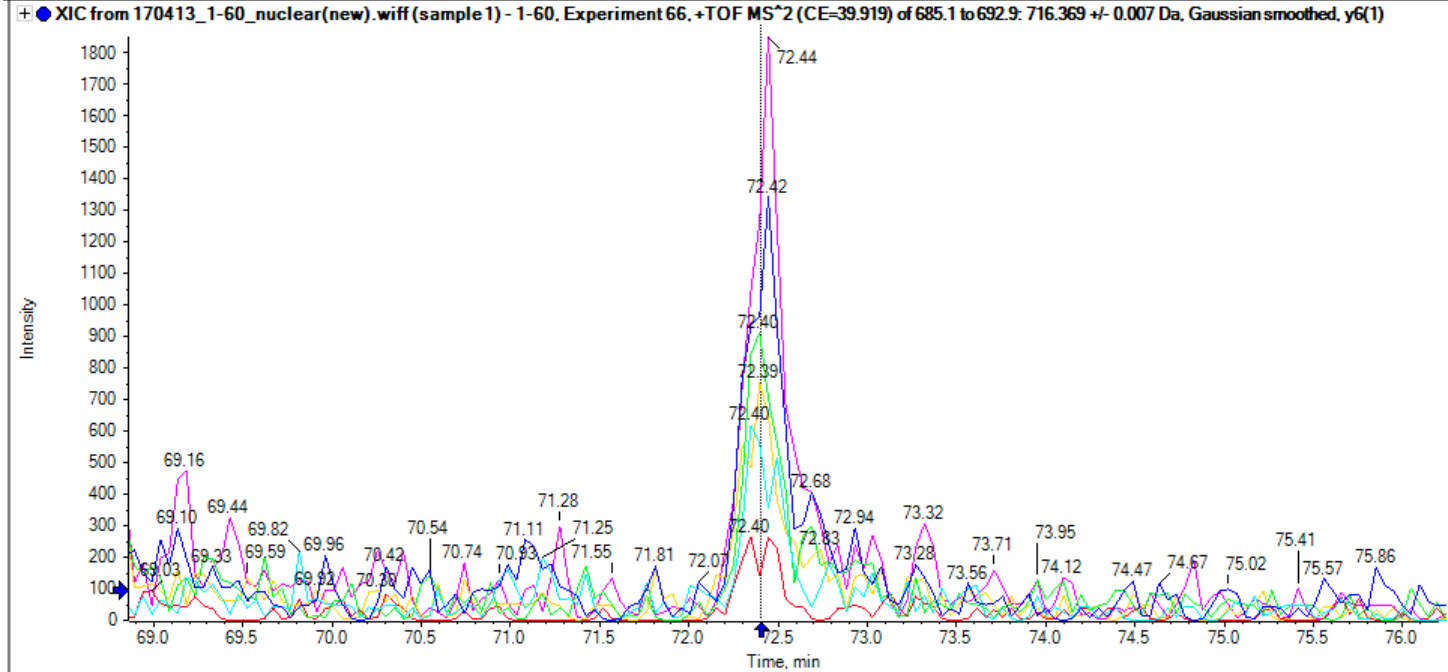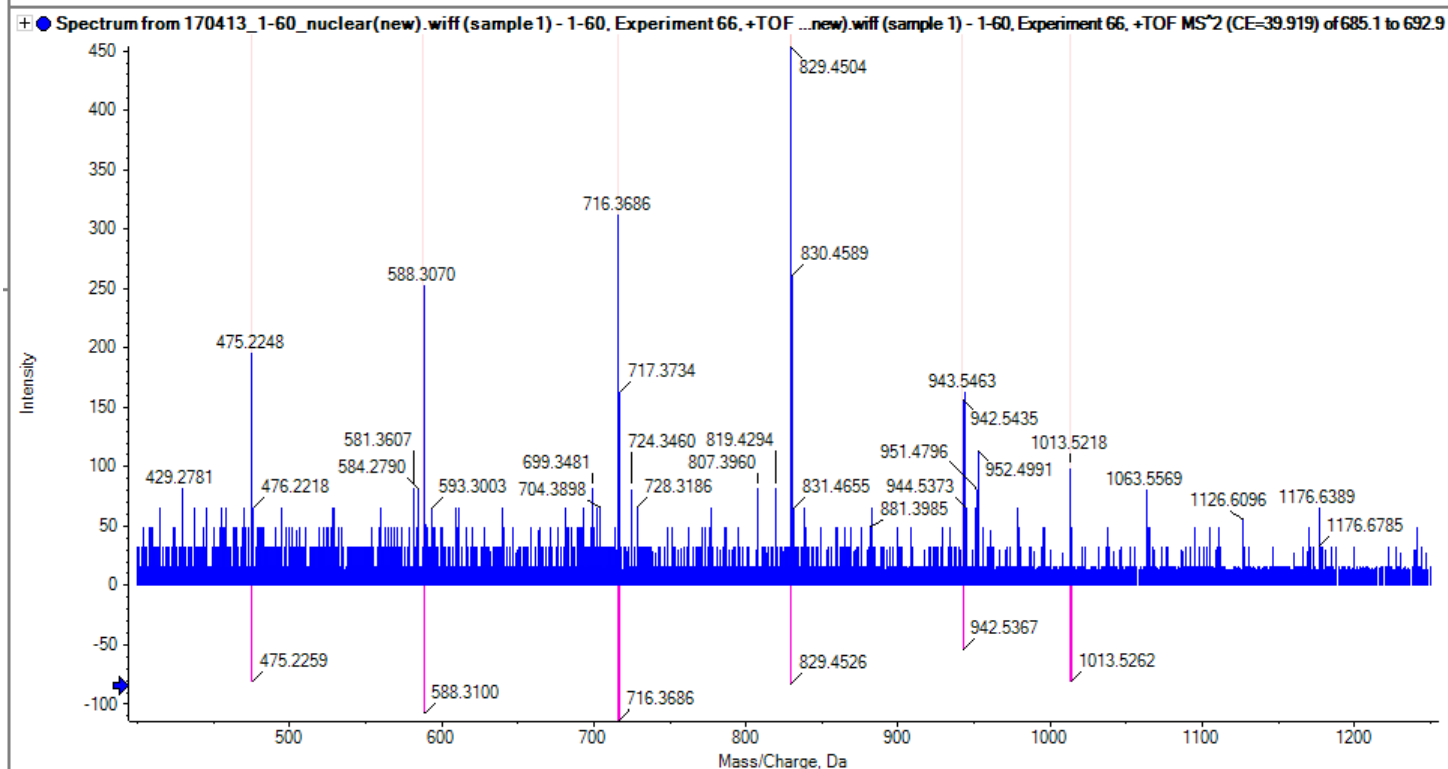

Mesencephalic astrocyte-derived  
neurotrophic factor  
DVTFSPATIENELIK

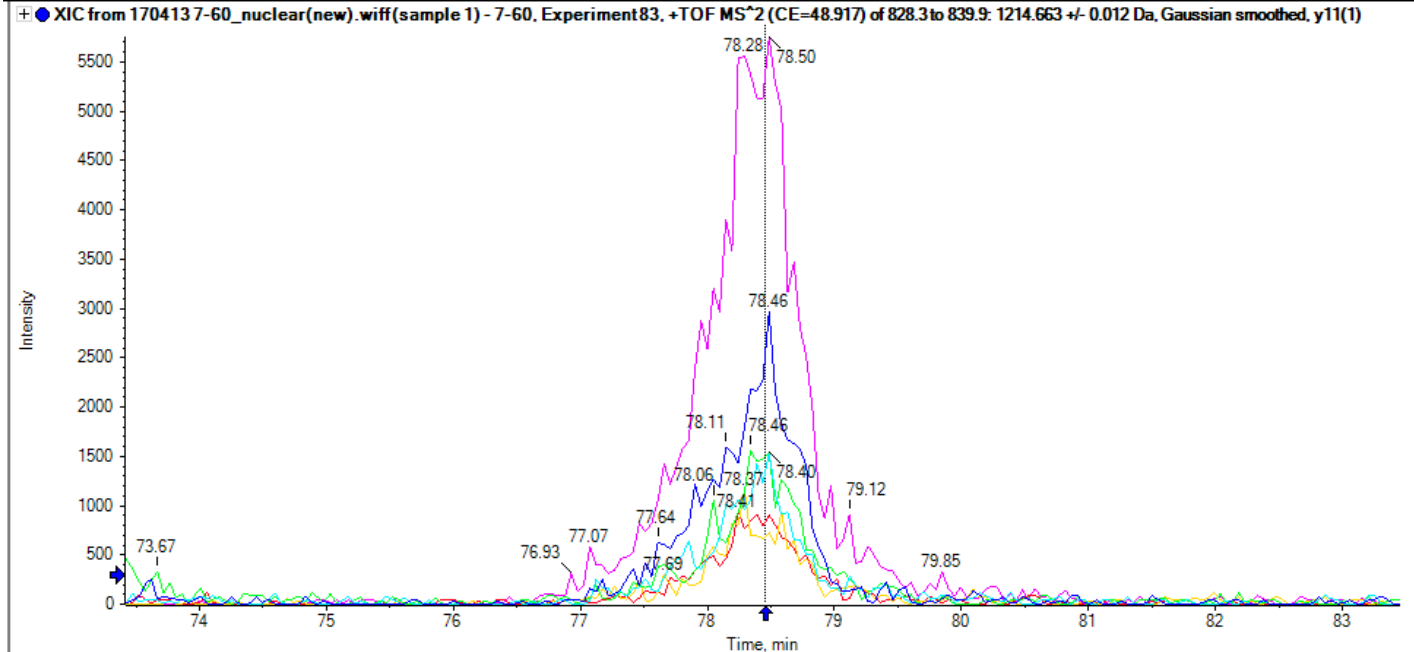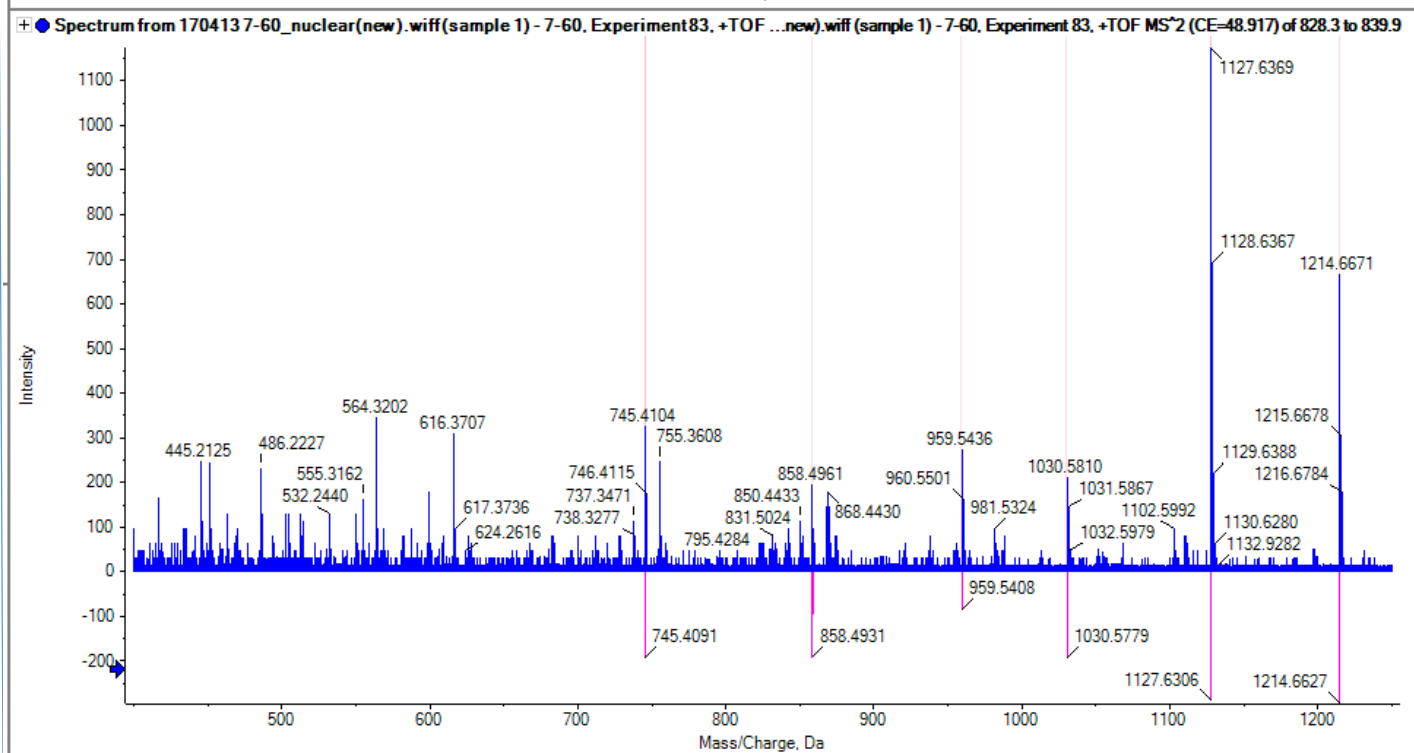

Protein disulfide-isomerase A6  
TGEAIVDAALSALR

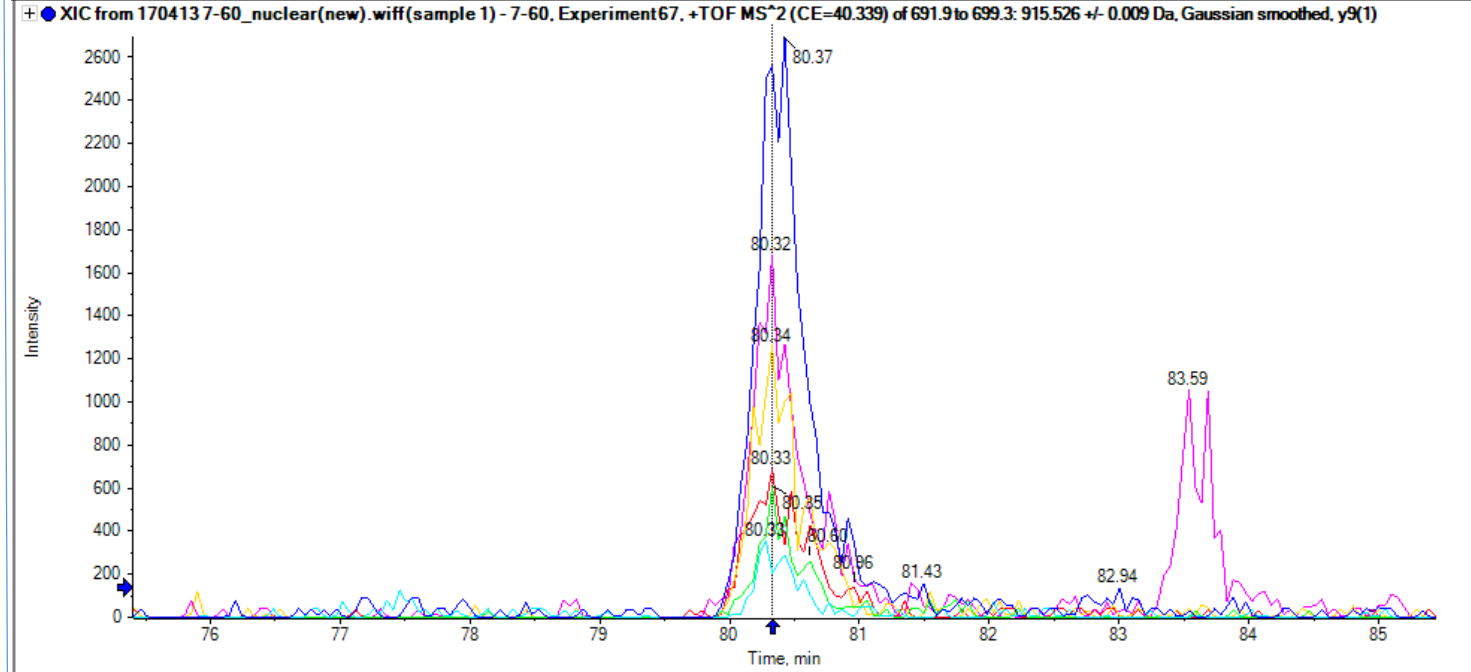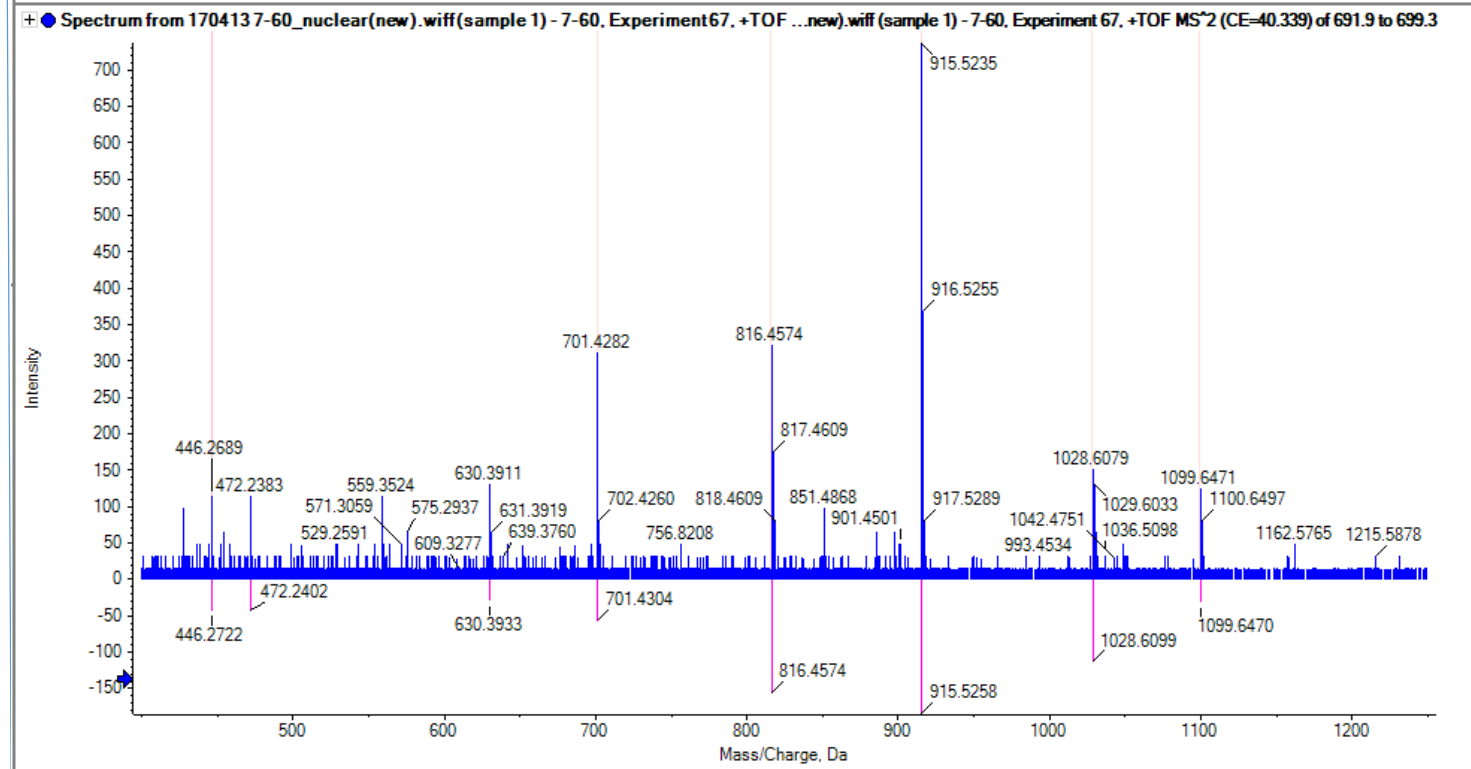

# Tripartite motif-containing protein 42 IIMEQIENLEVSR

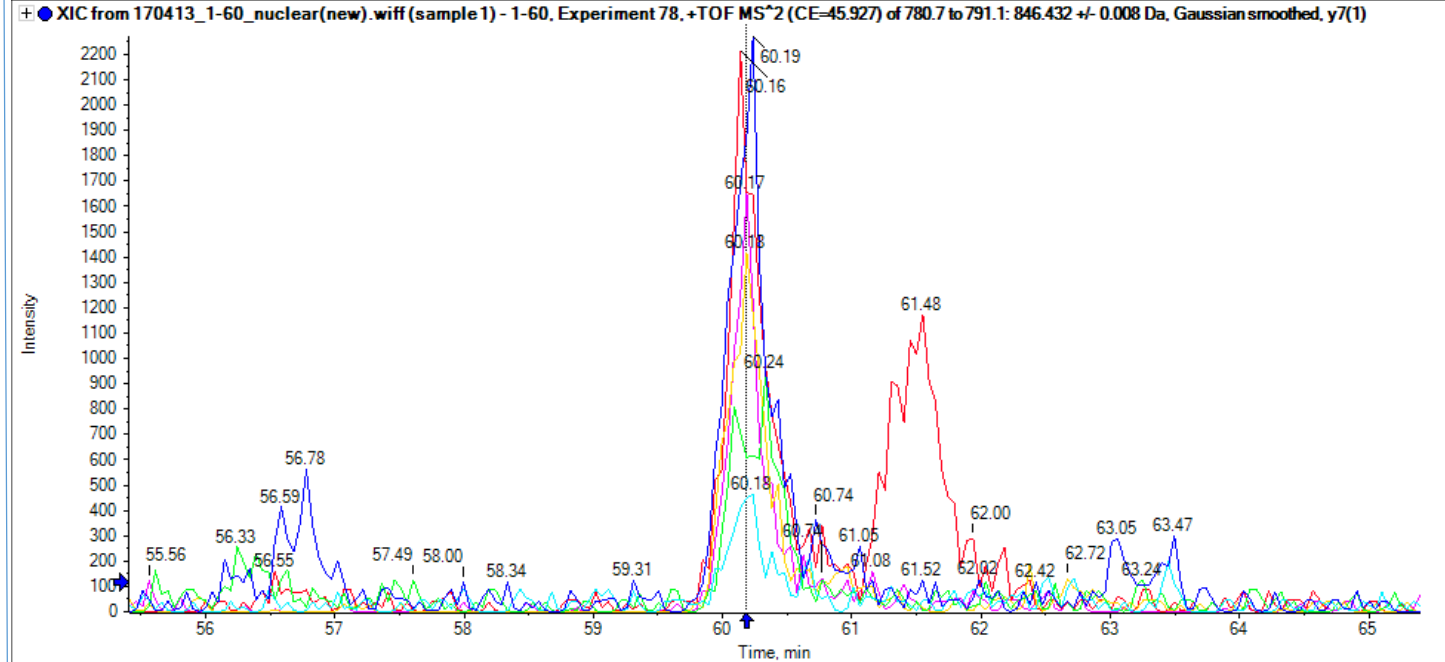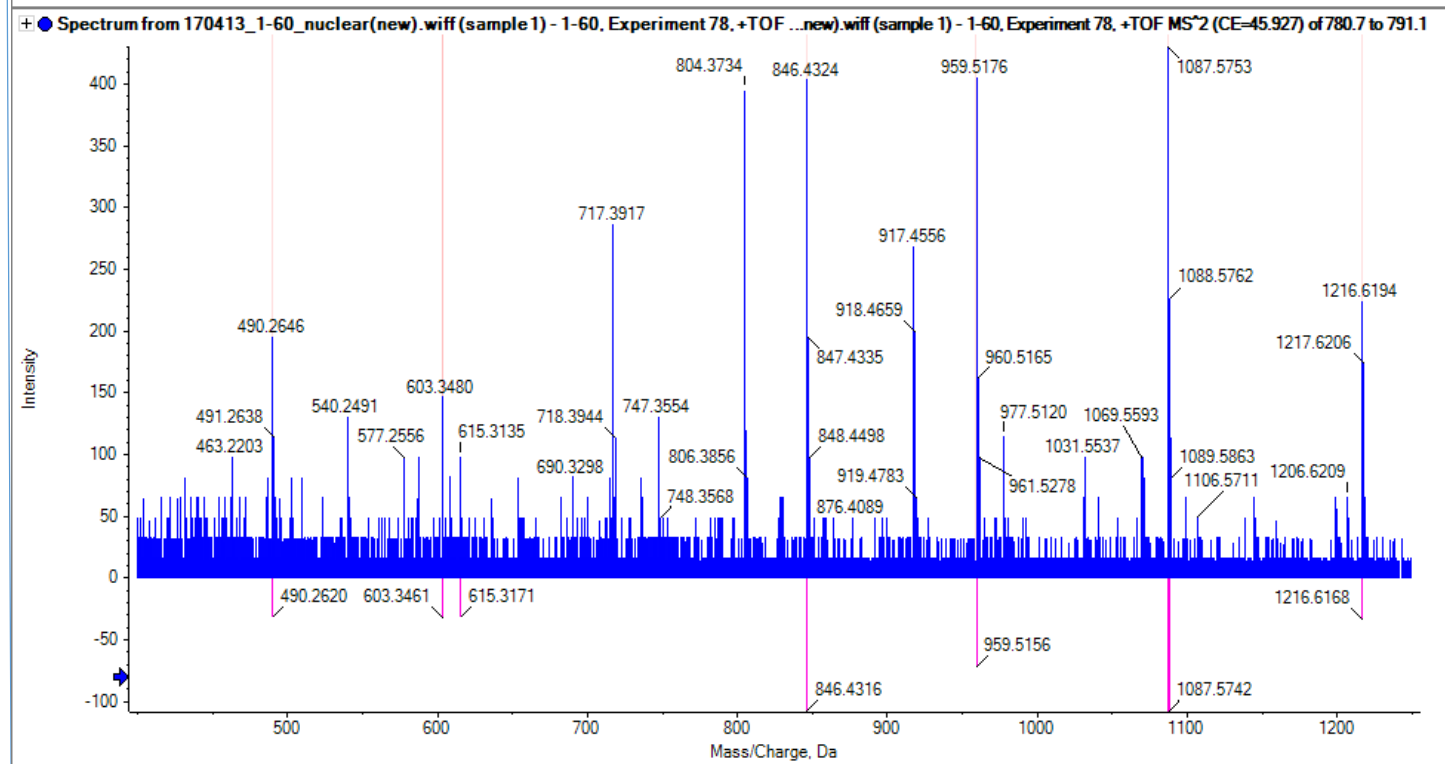

Torsin-1A-interacting protein 1  
SIQEAPVSEDLVIR

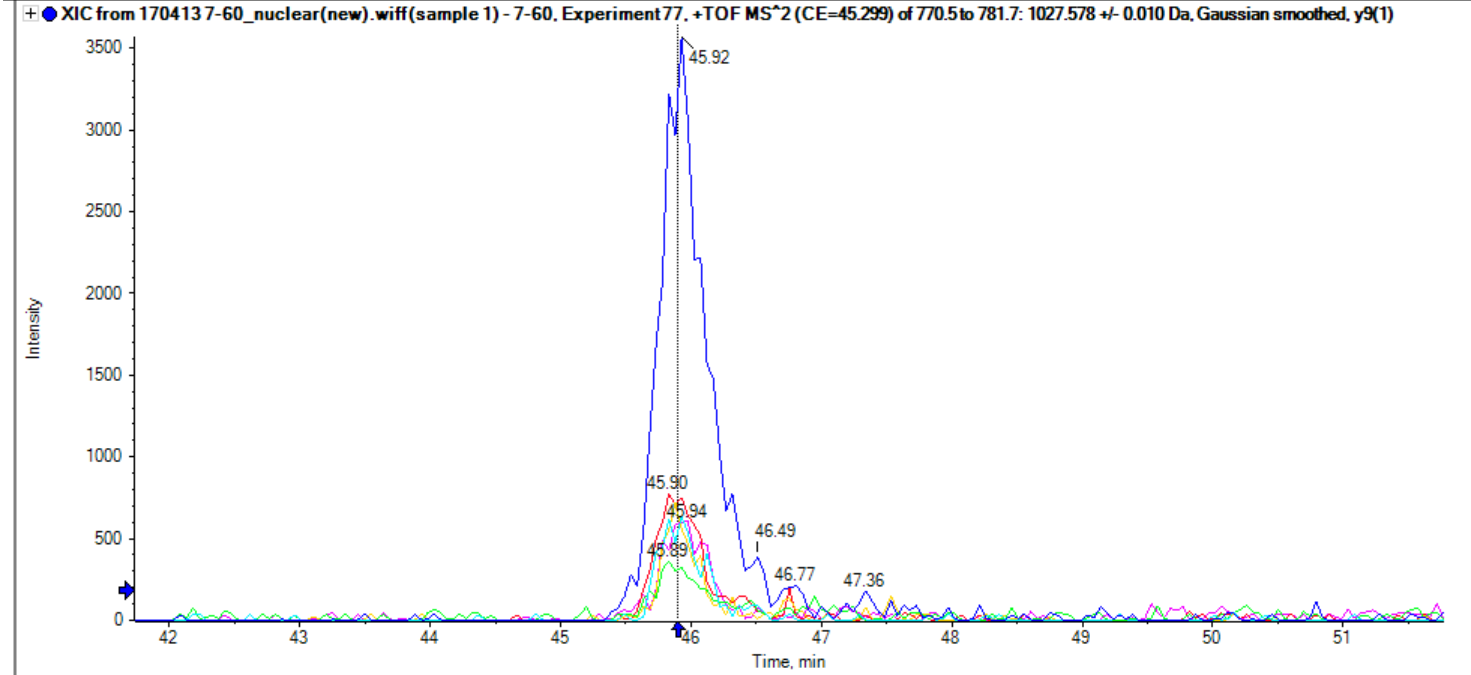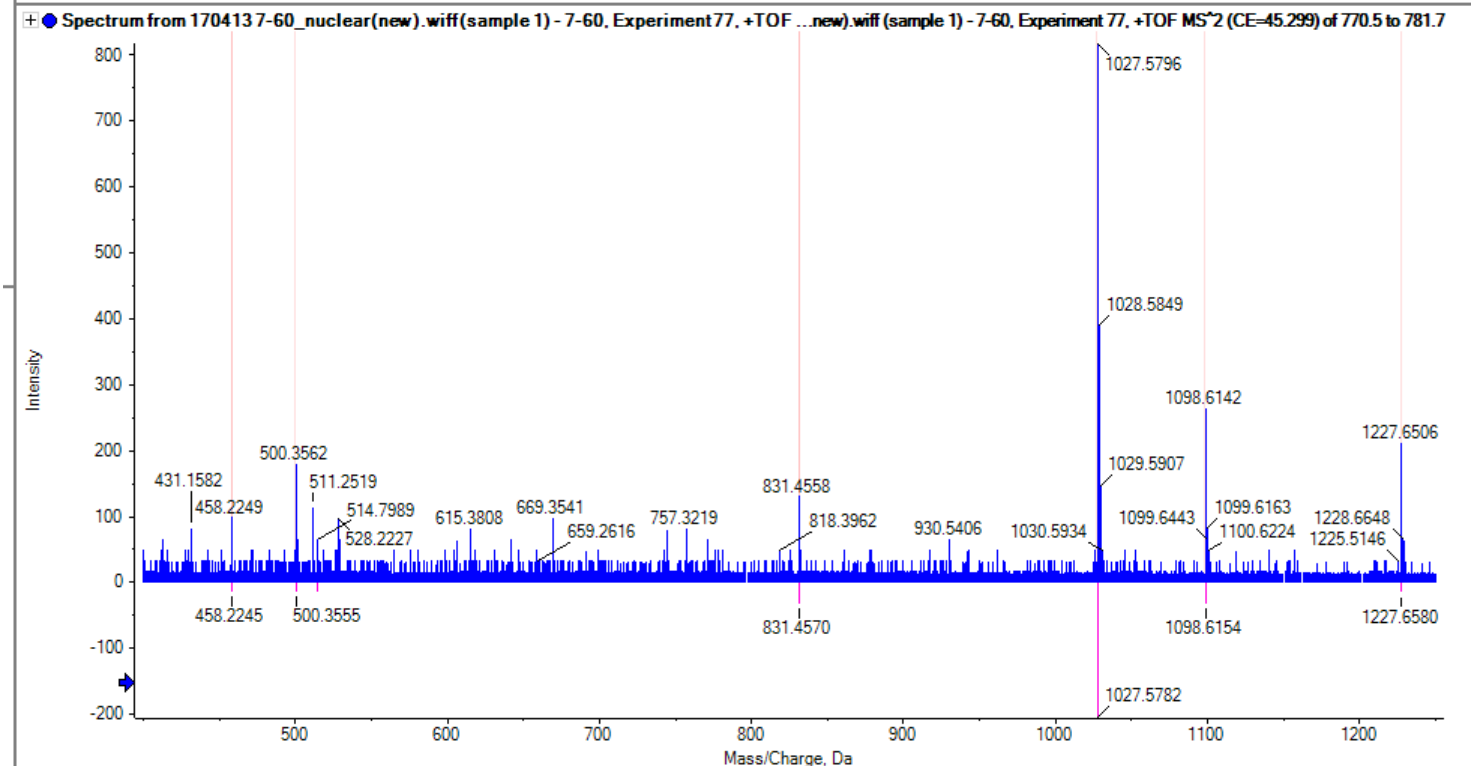

Surfeit locus protein 4  
GQNDLMGTAEDFADQFLR

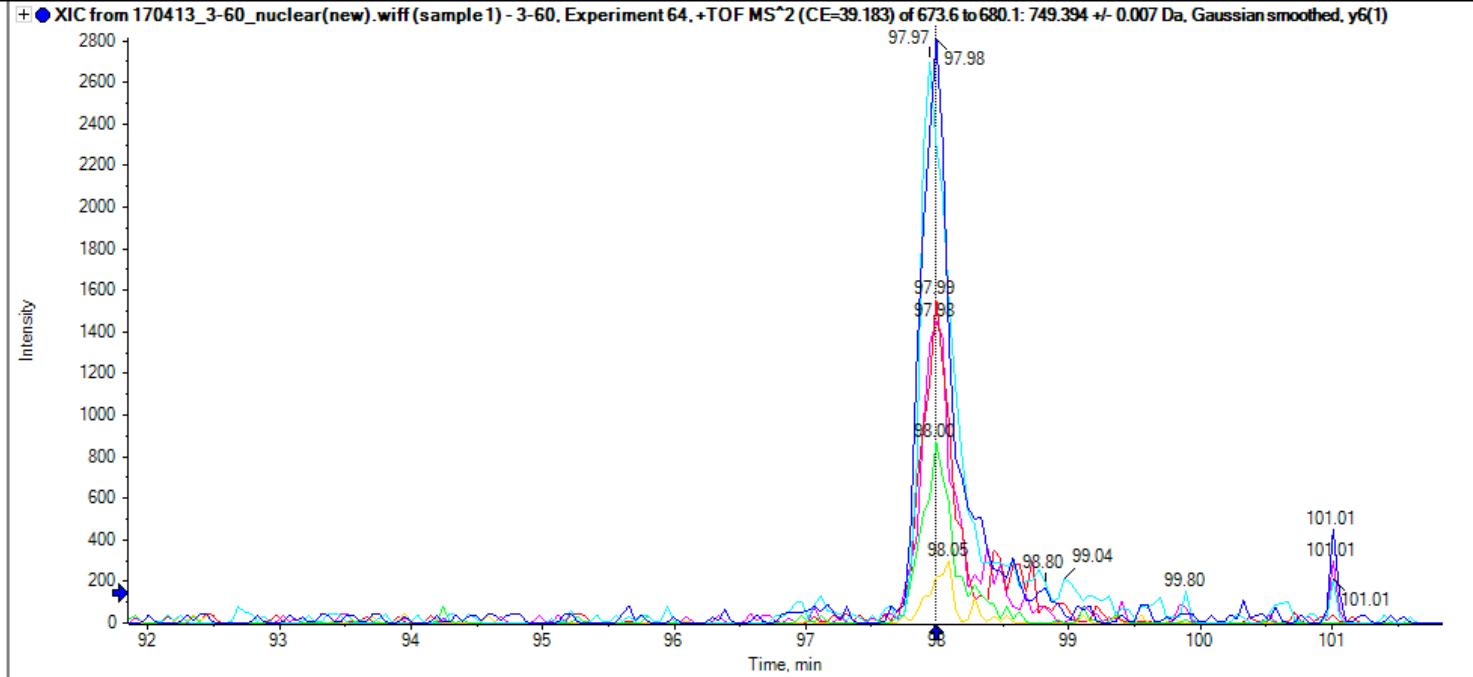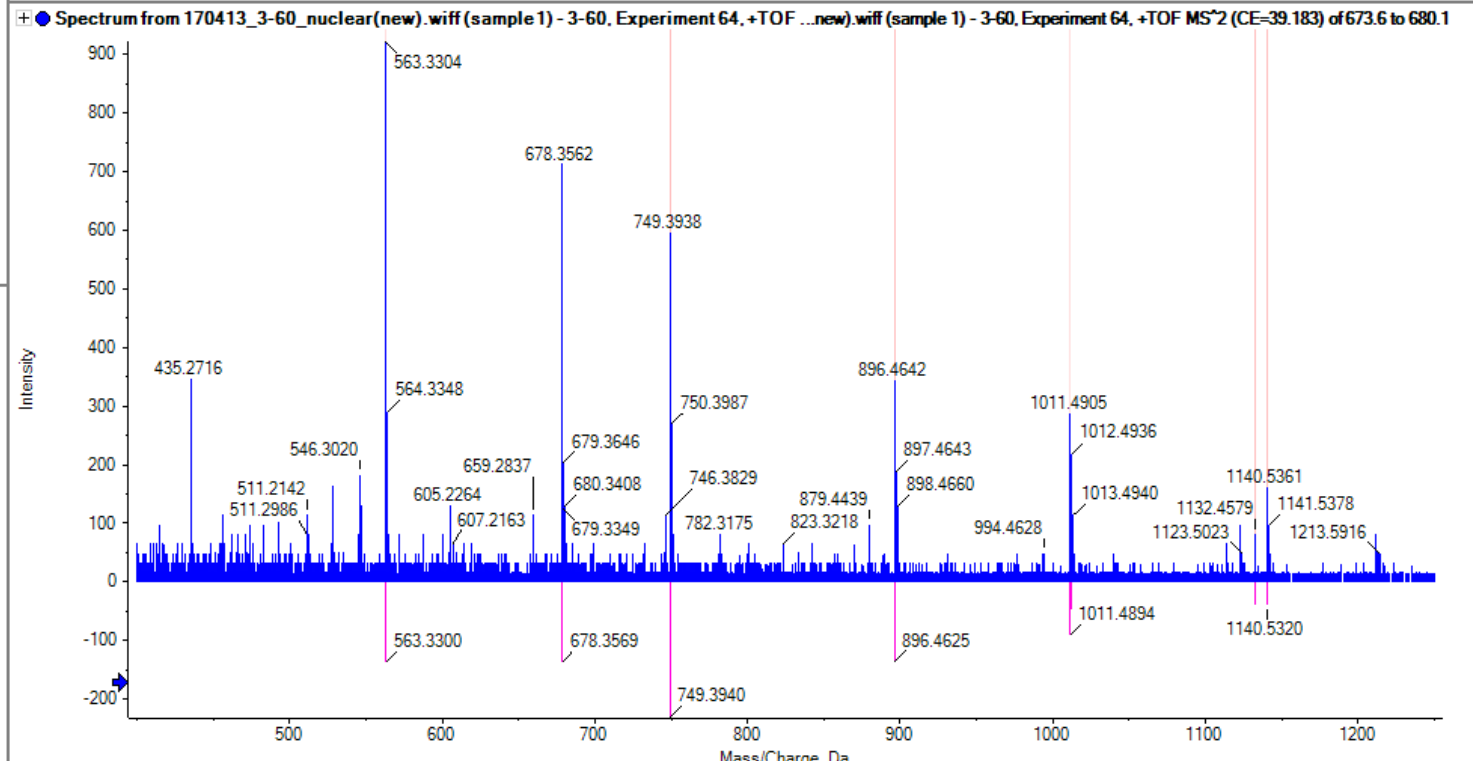



Casein kinase I isoform alpha  
FEEAPDYM<sup>+</sup>LR

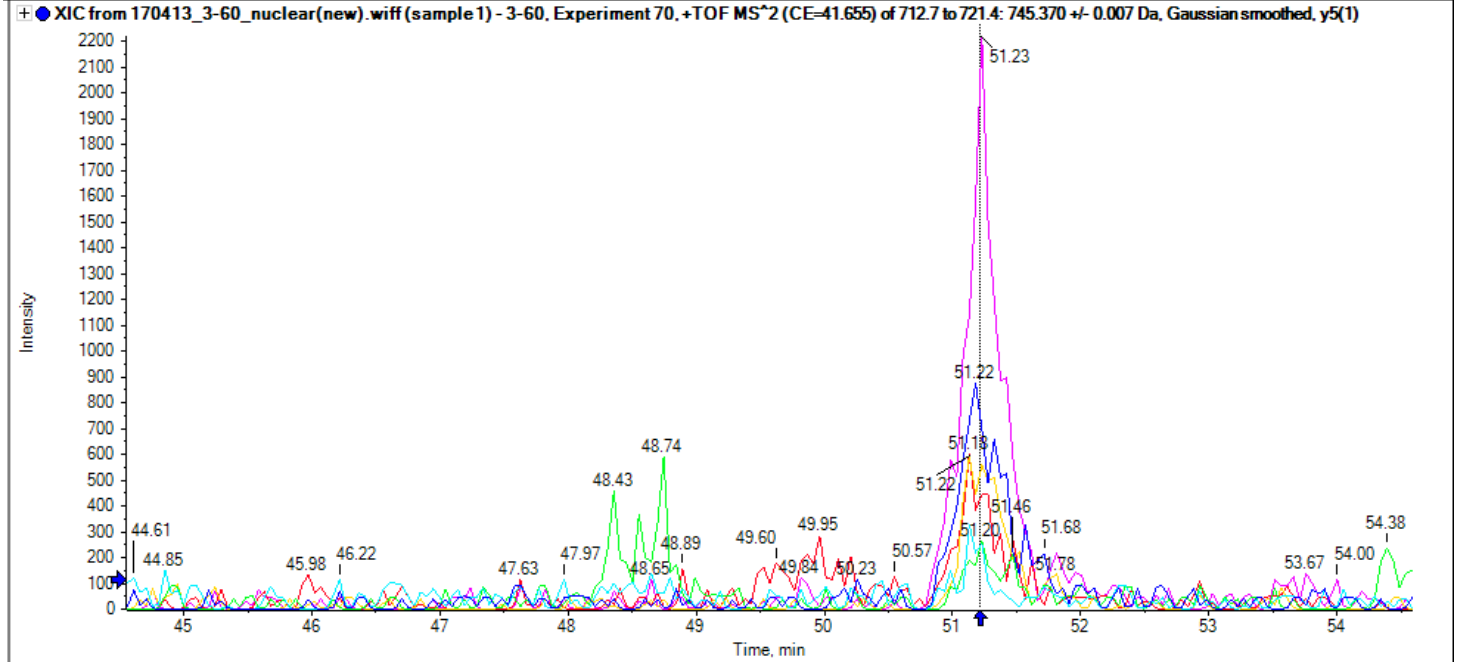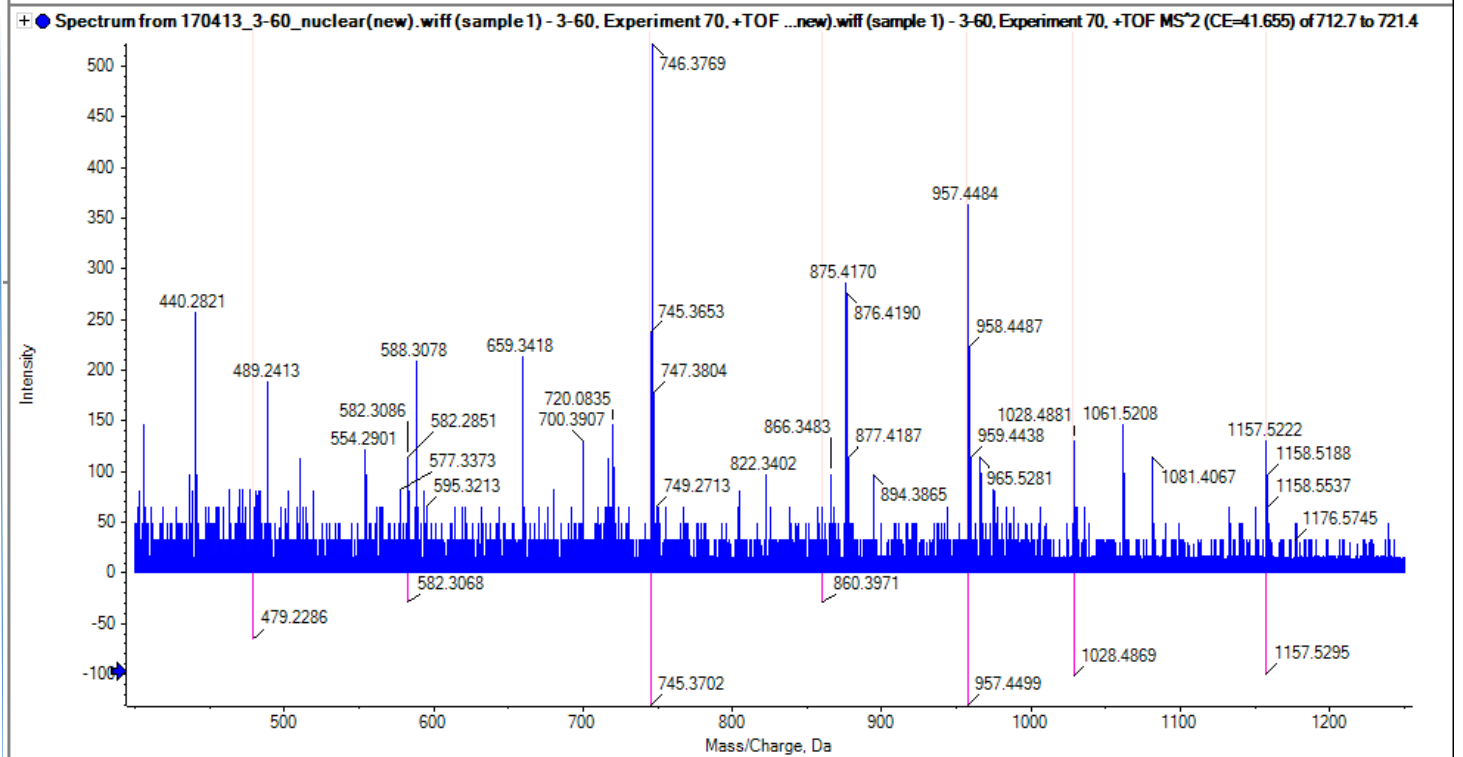

# Nuclear pore membrane glycoprotein 210-like QGDVILSGIR

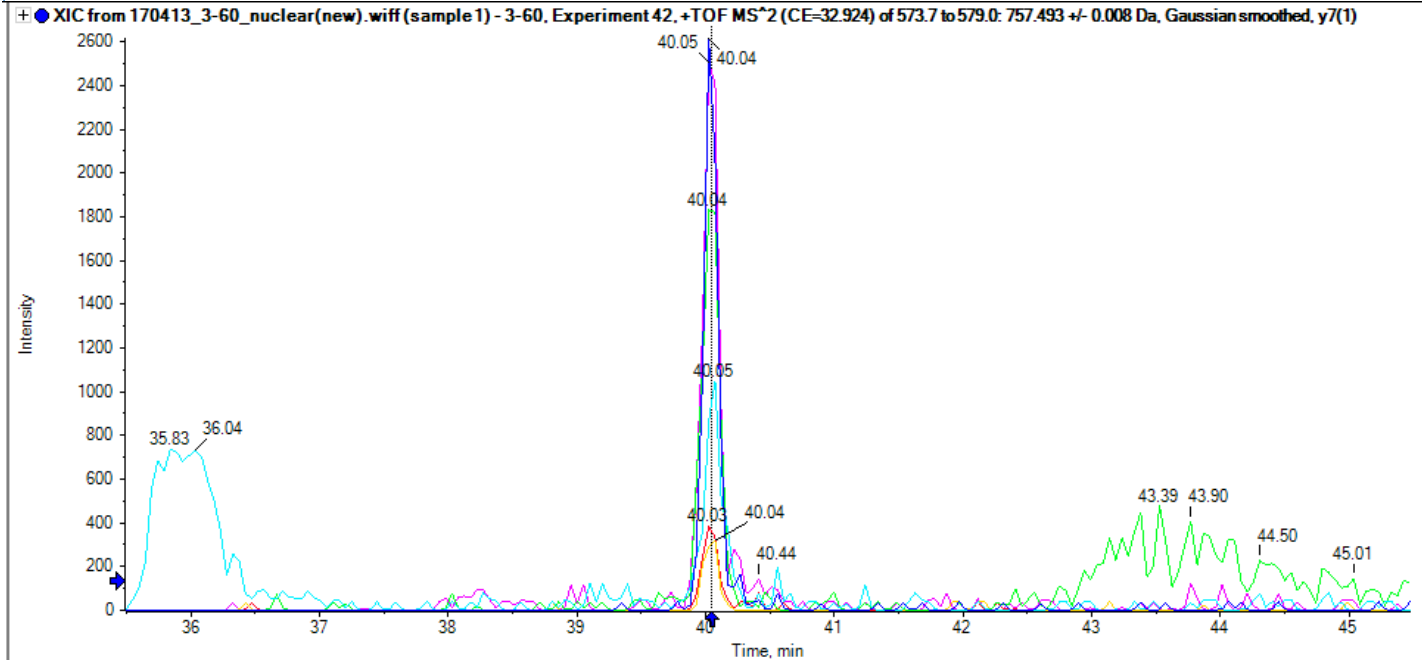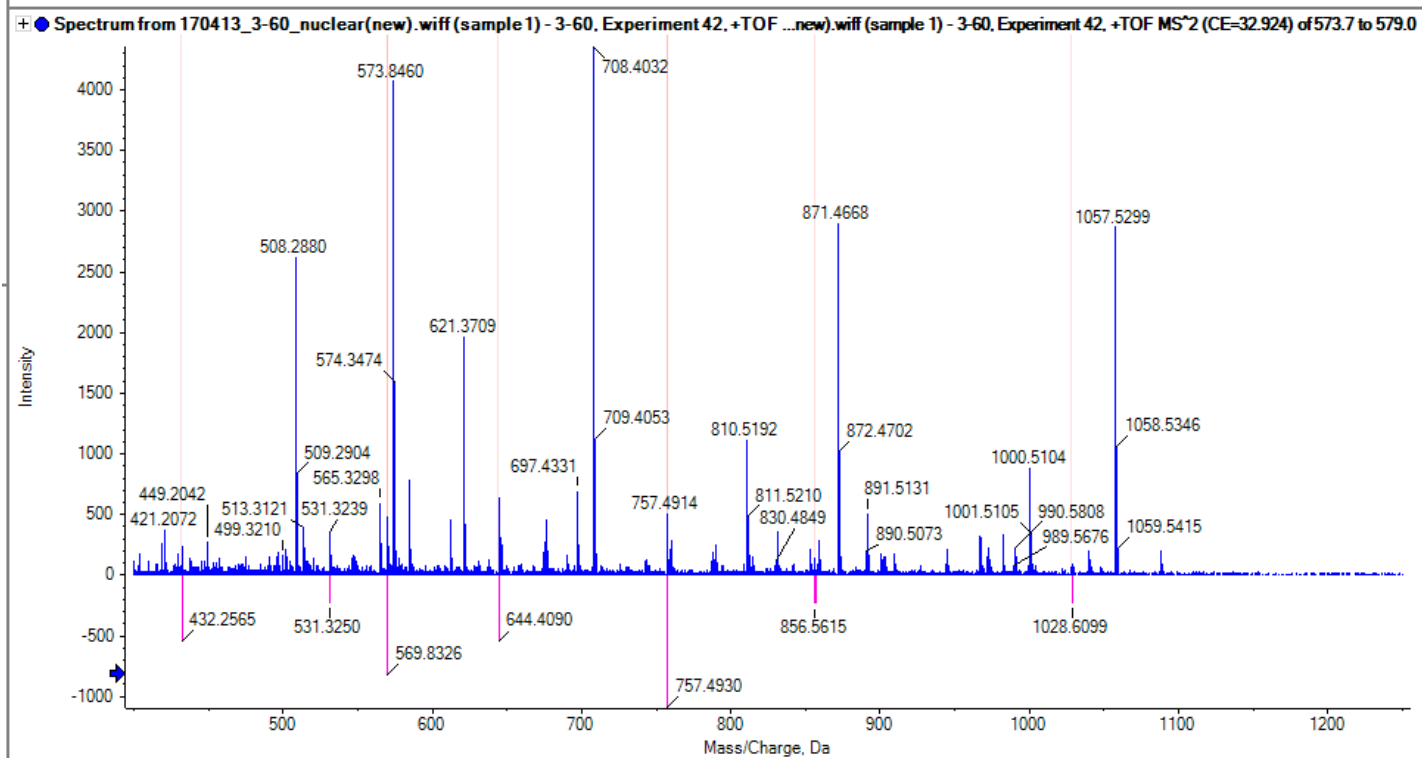

Xaa-Pro dipeptidase  
AAATGPSWLGNETLK

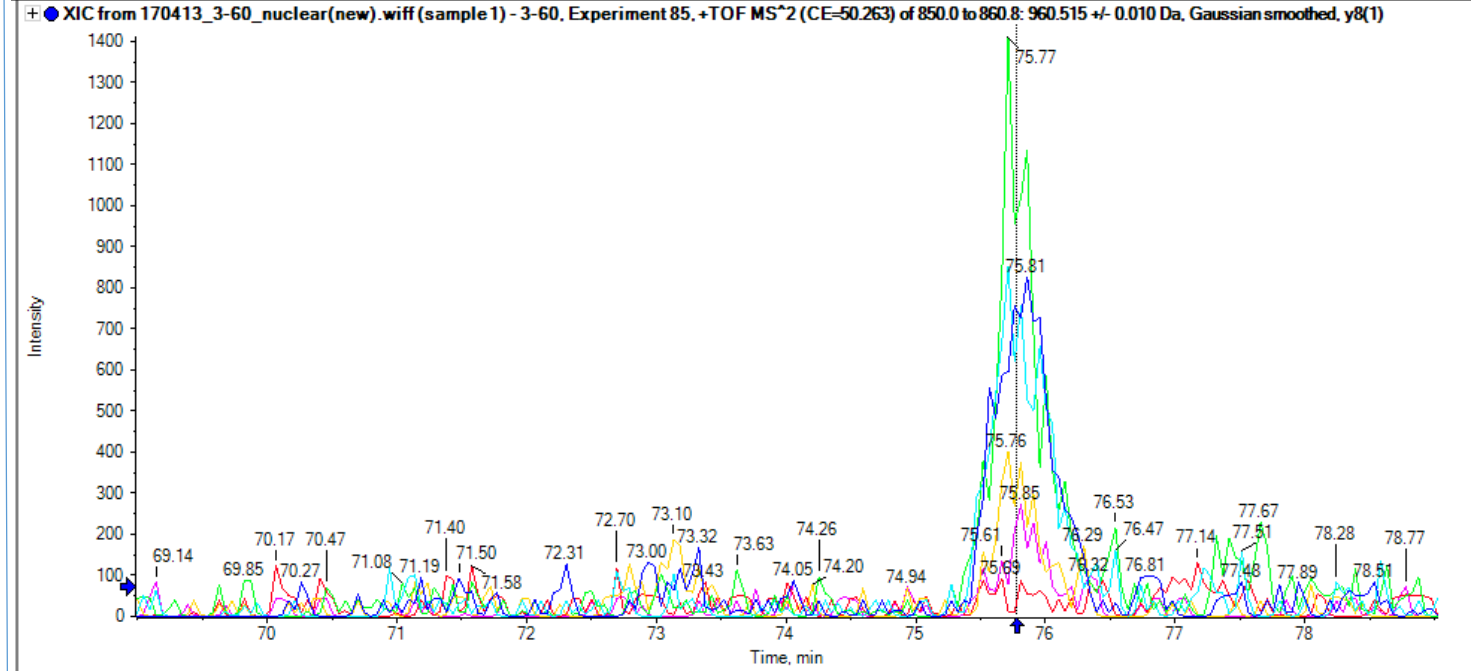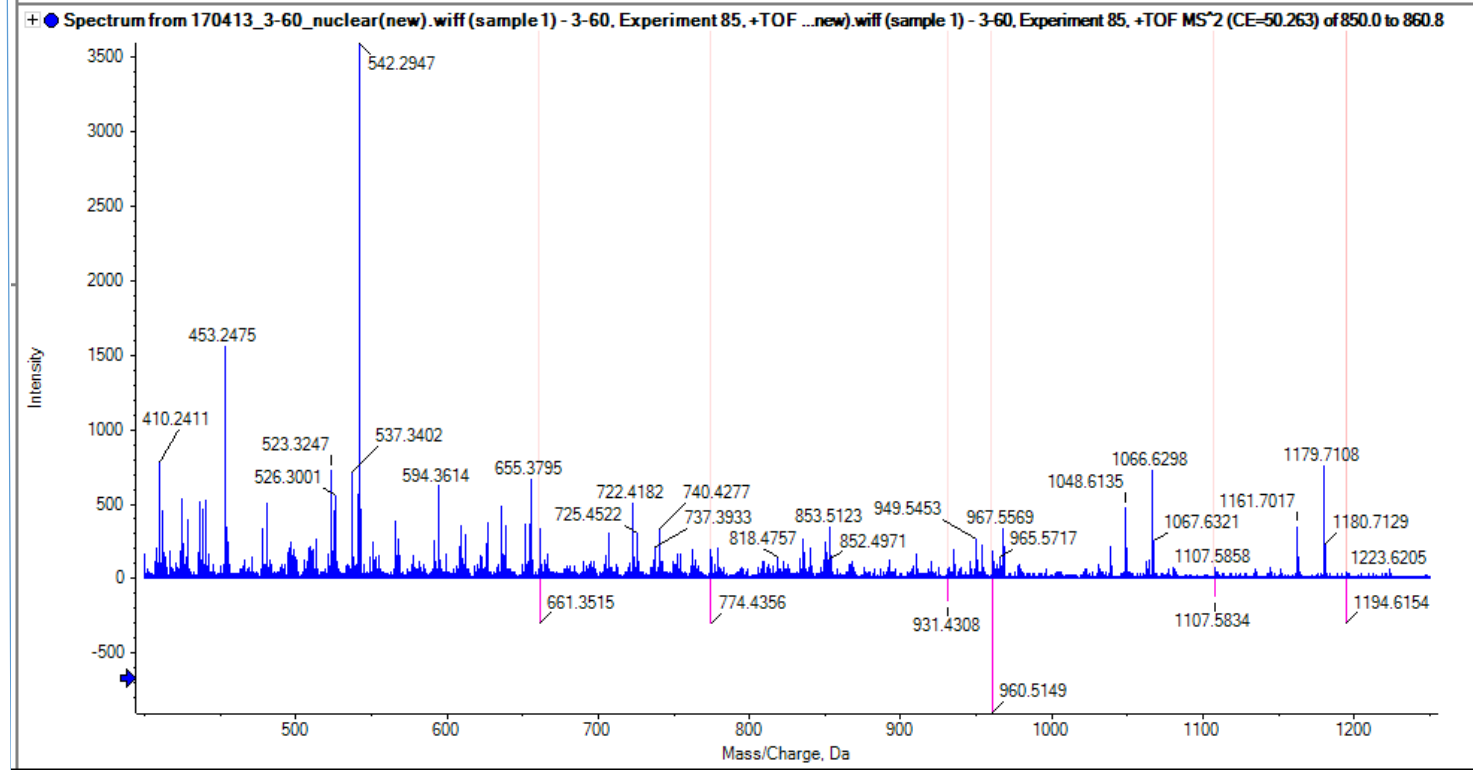

Cancer/testis antigen 47A  
AGEGLGLIQAASVPEPAVPADLAEMAR

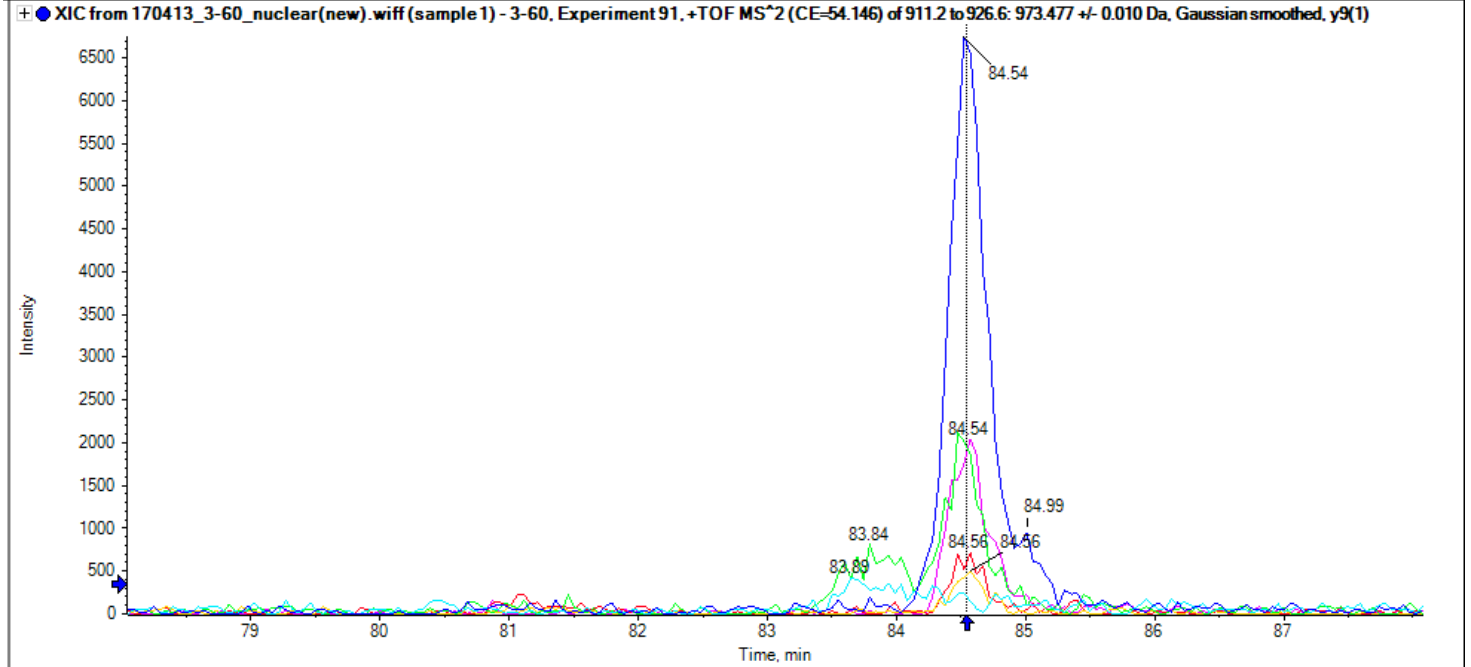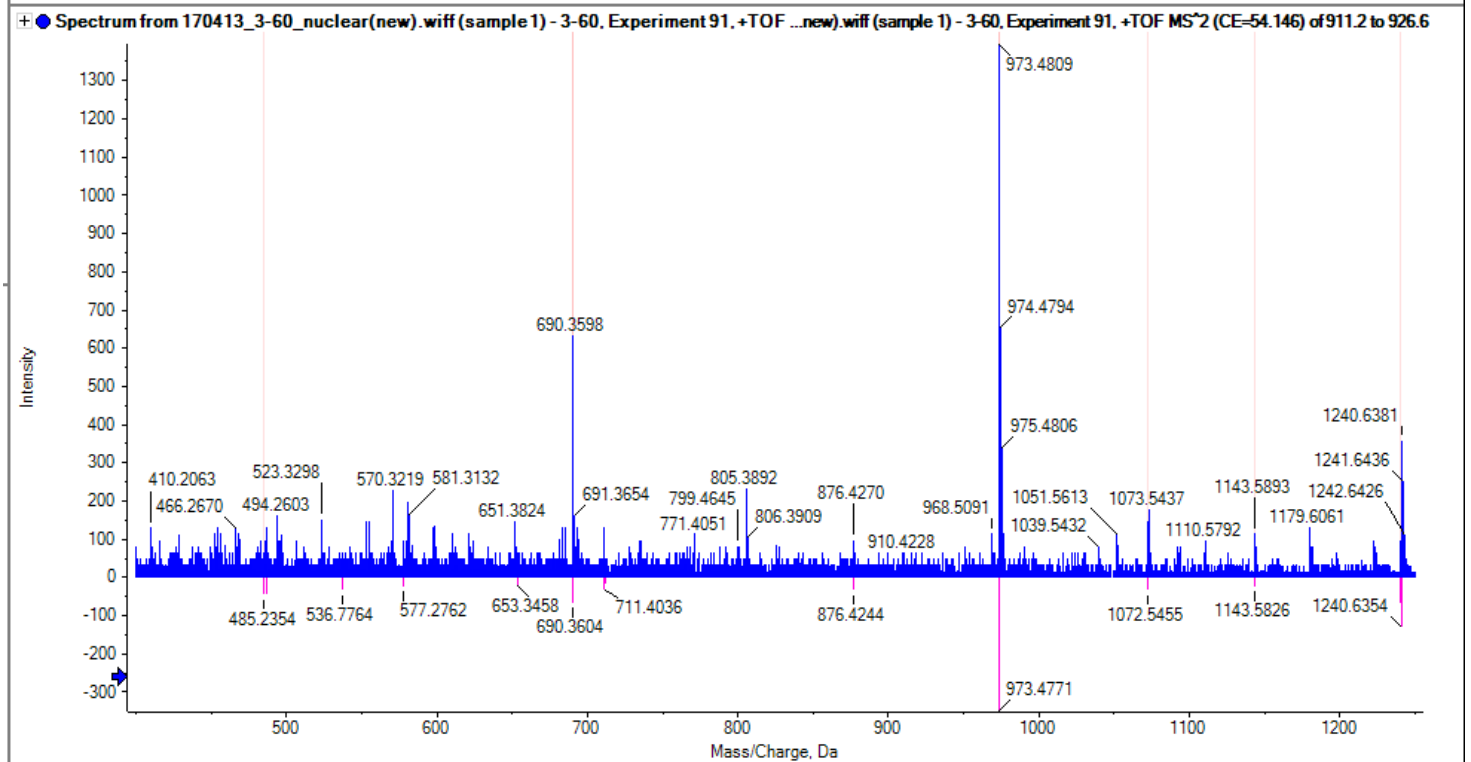

# Hypoxanthine-guanine phosphoribosyltransferase NVLVEDIIDTGK

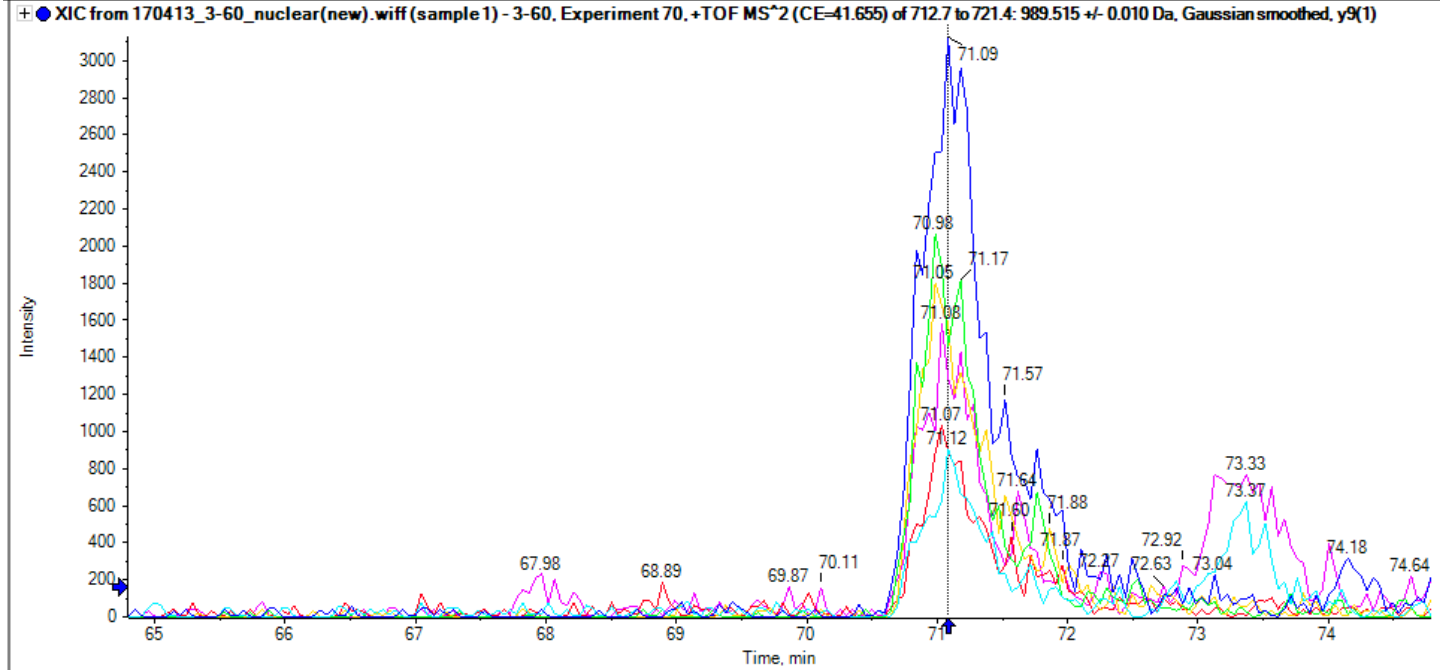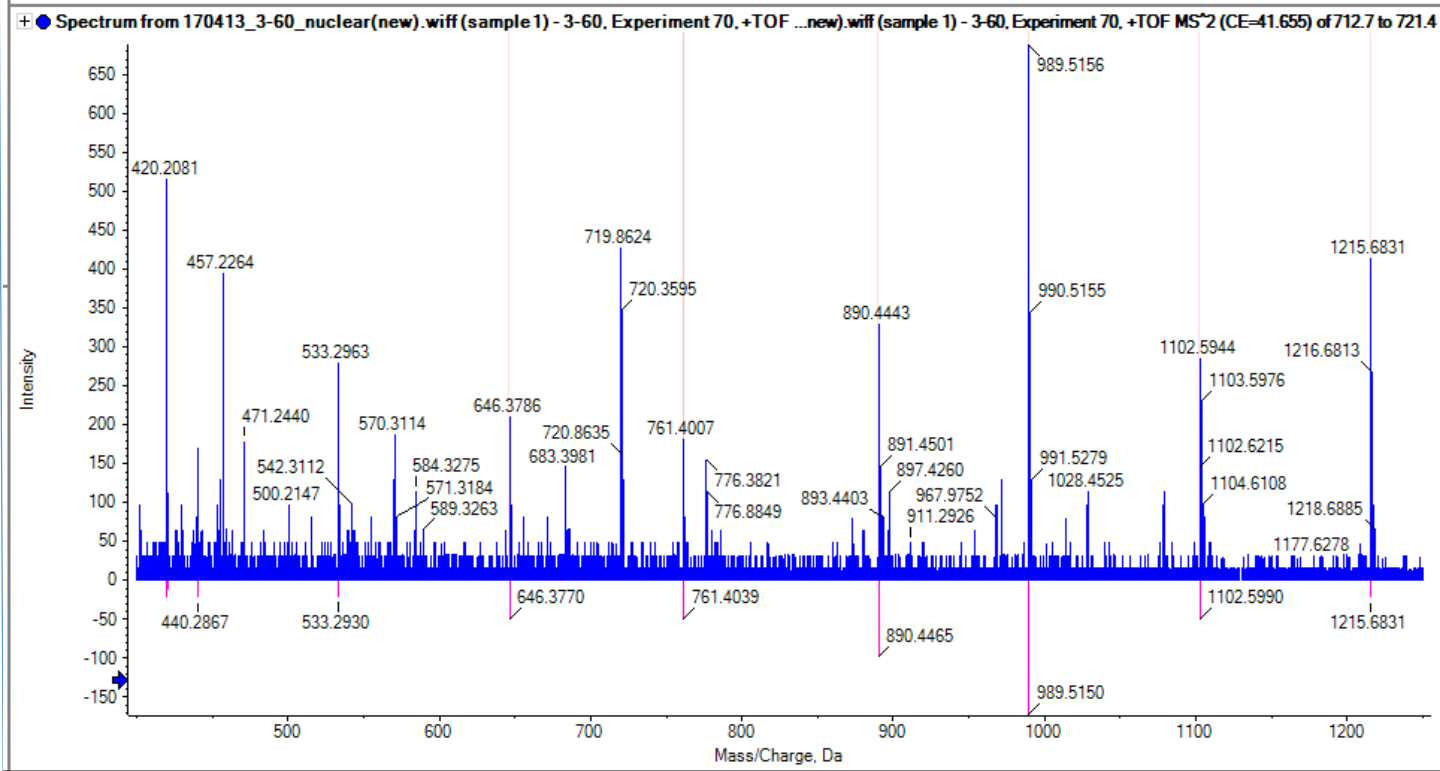

40S ribosomal protein S25  
LITPAVVSR

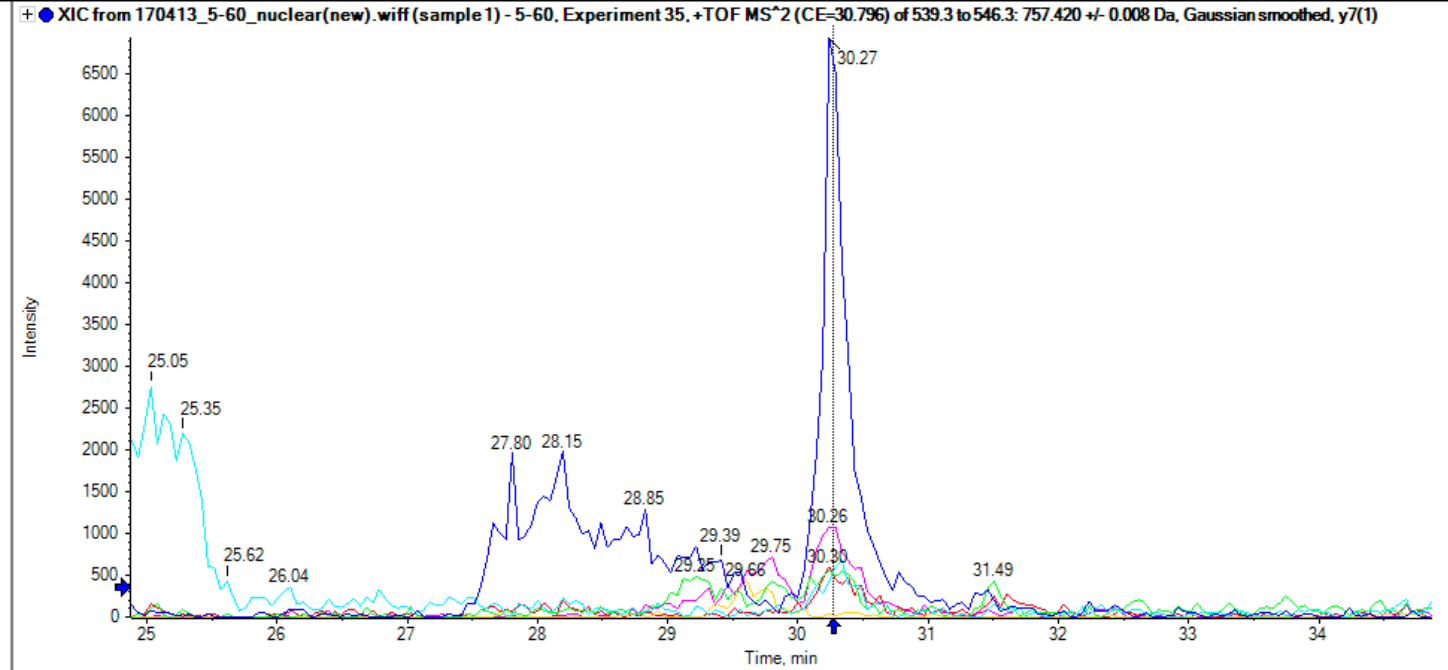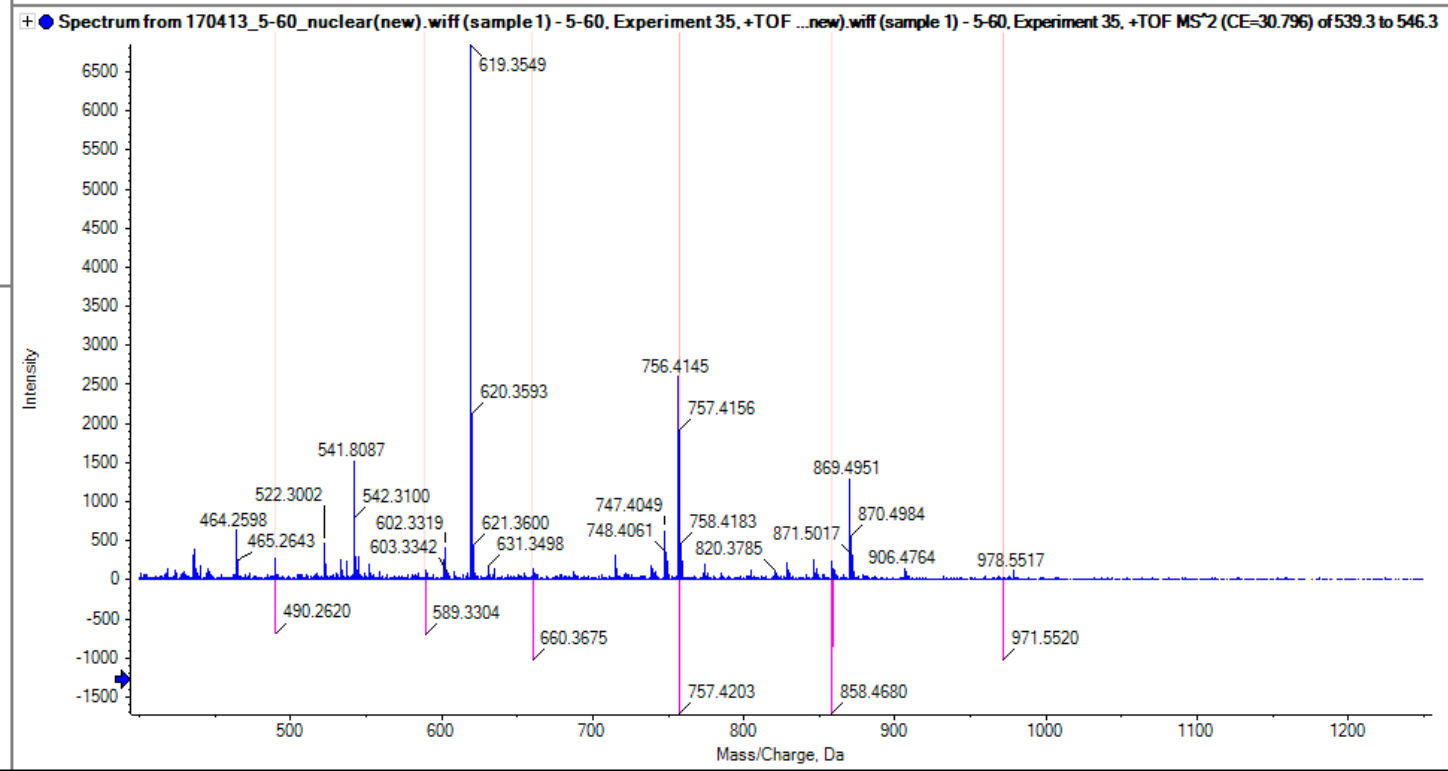

sp|Q13595|TRA2A\_HUMAN

YGPLSGVNVVYDQR

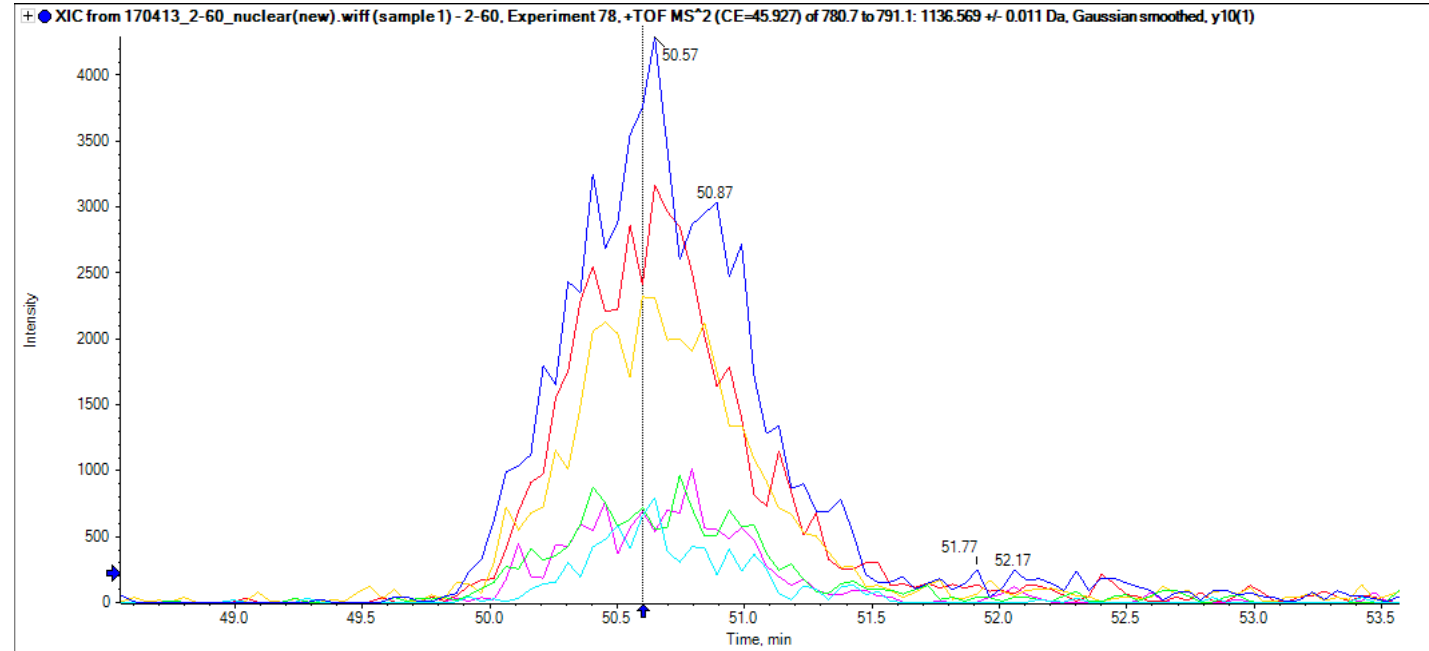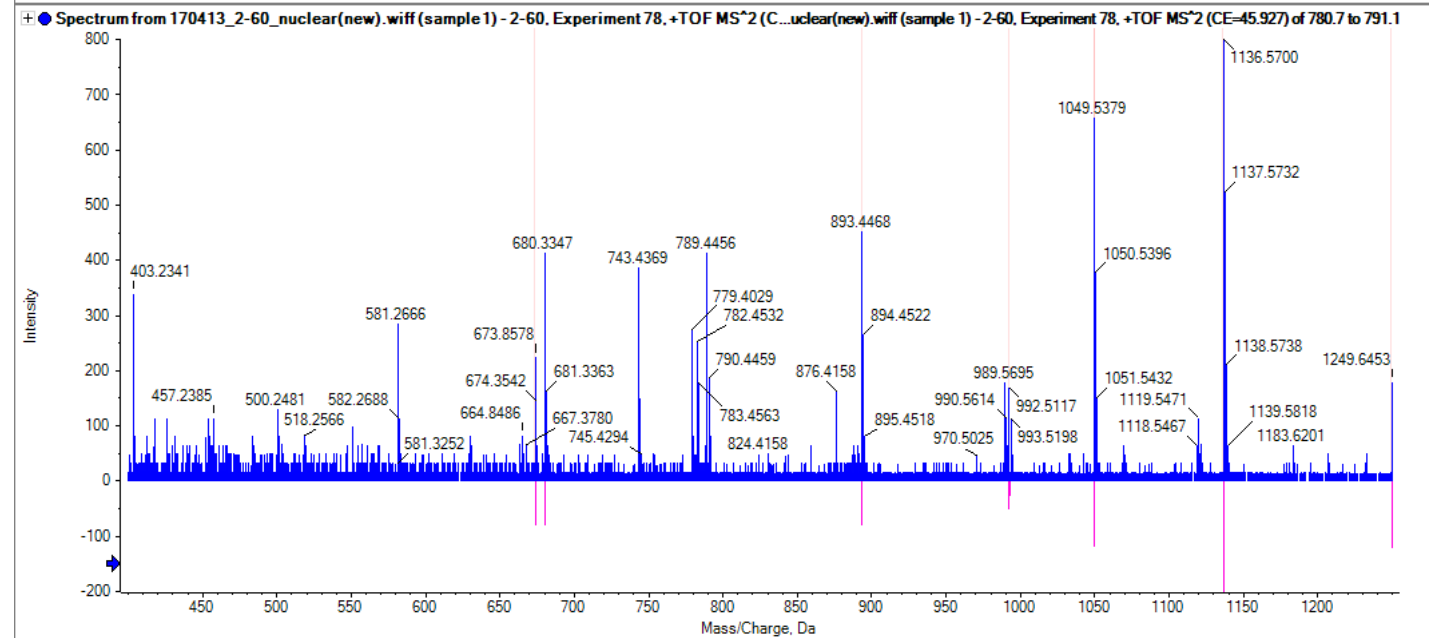

Seipin  
VLMTGQPRY

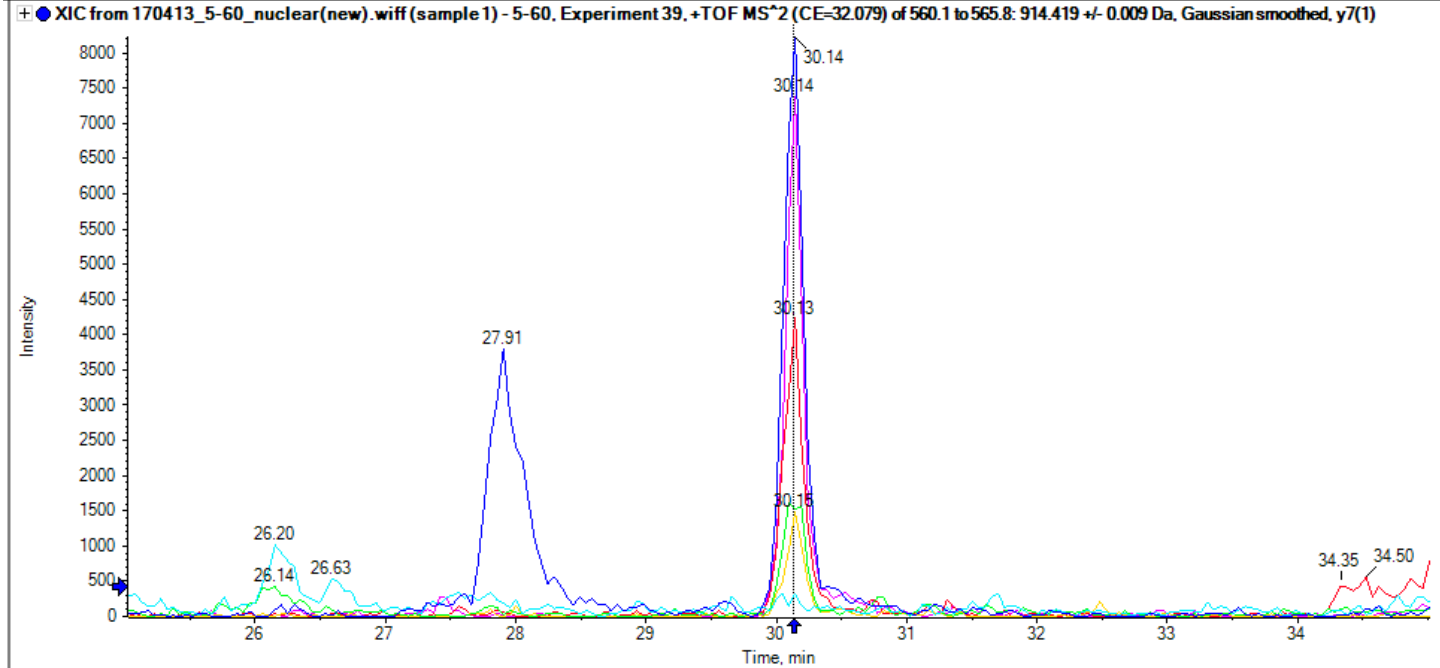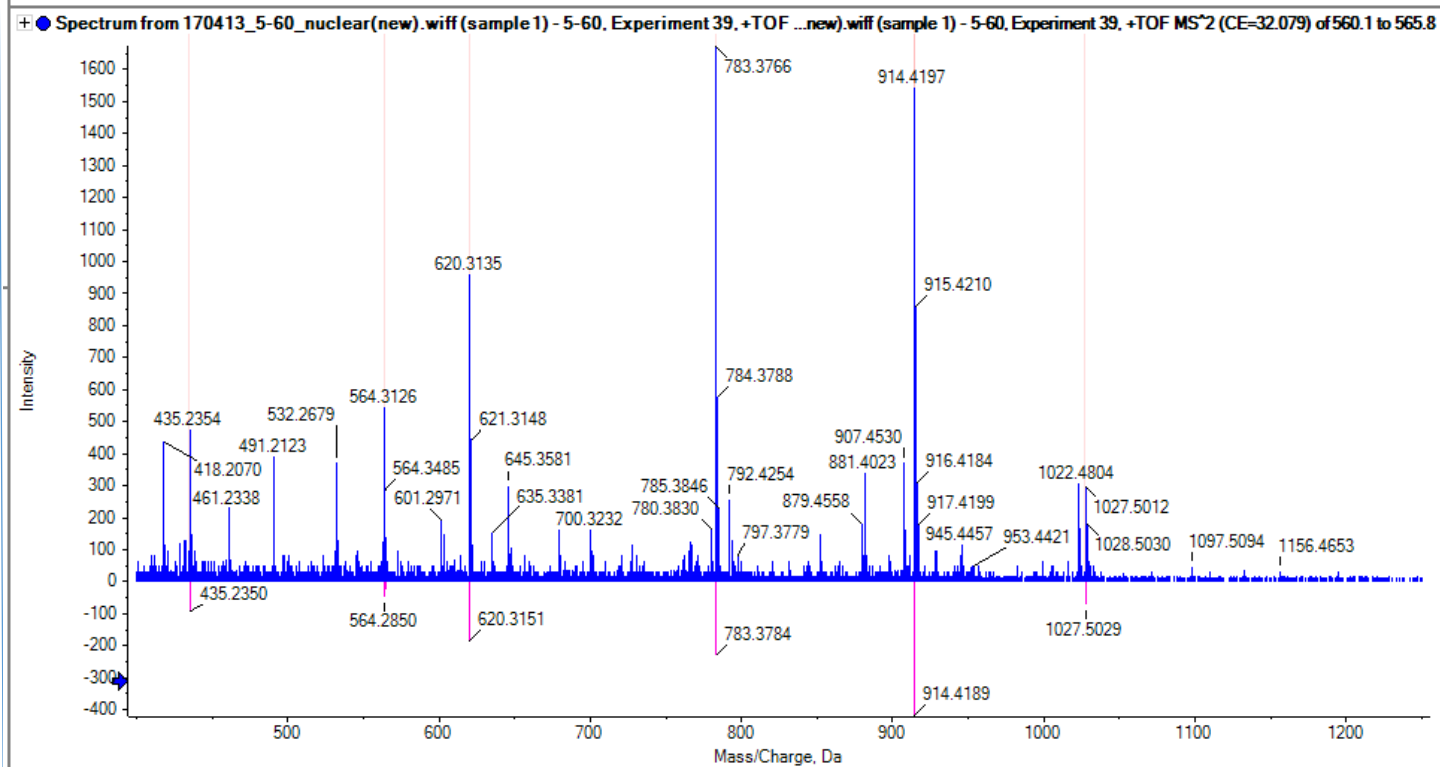



# Receptor expression-enhancing protein 6 NLVTEVLGALEAK

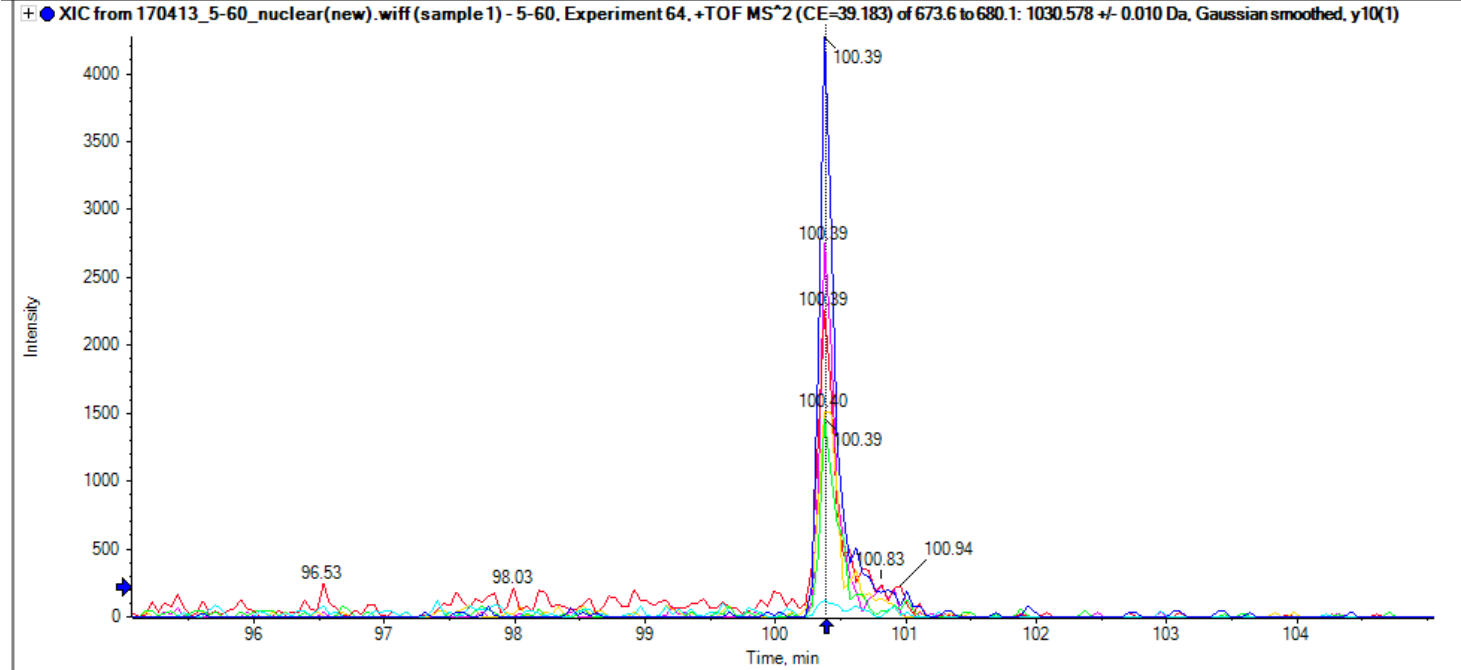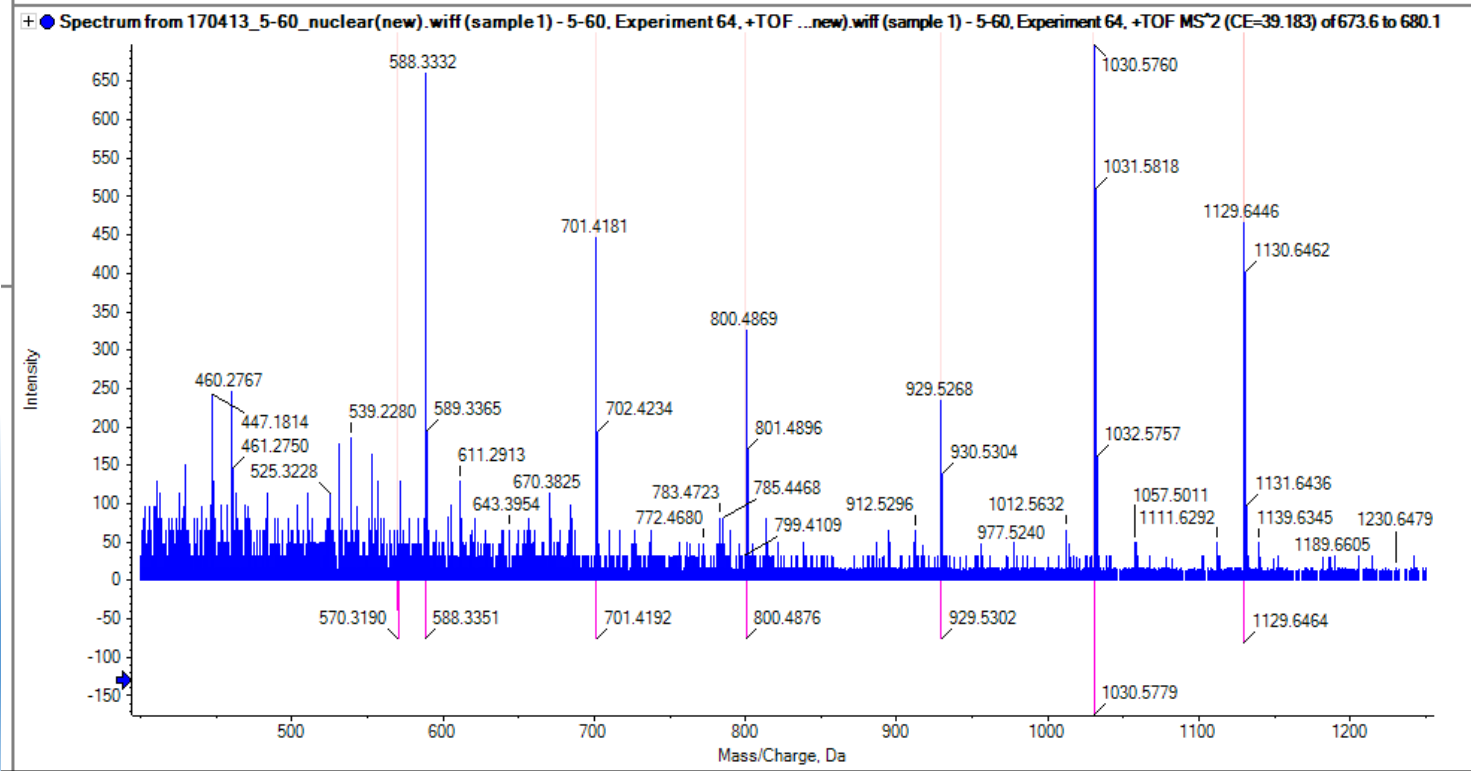

sp|Q6FI13|H2A2A\_HUMAN  
VGAGAPVYMAAVLEYLTAEILELAGNAAR

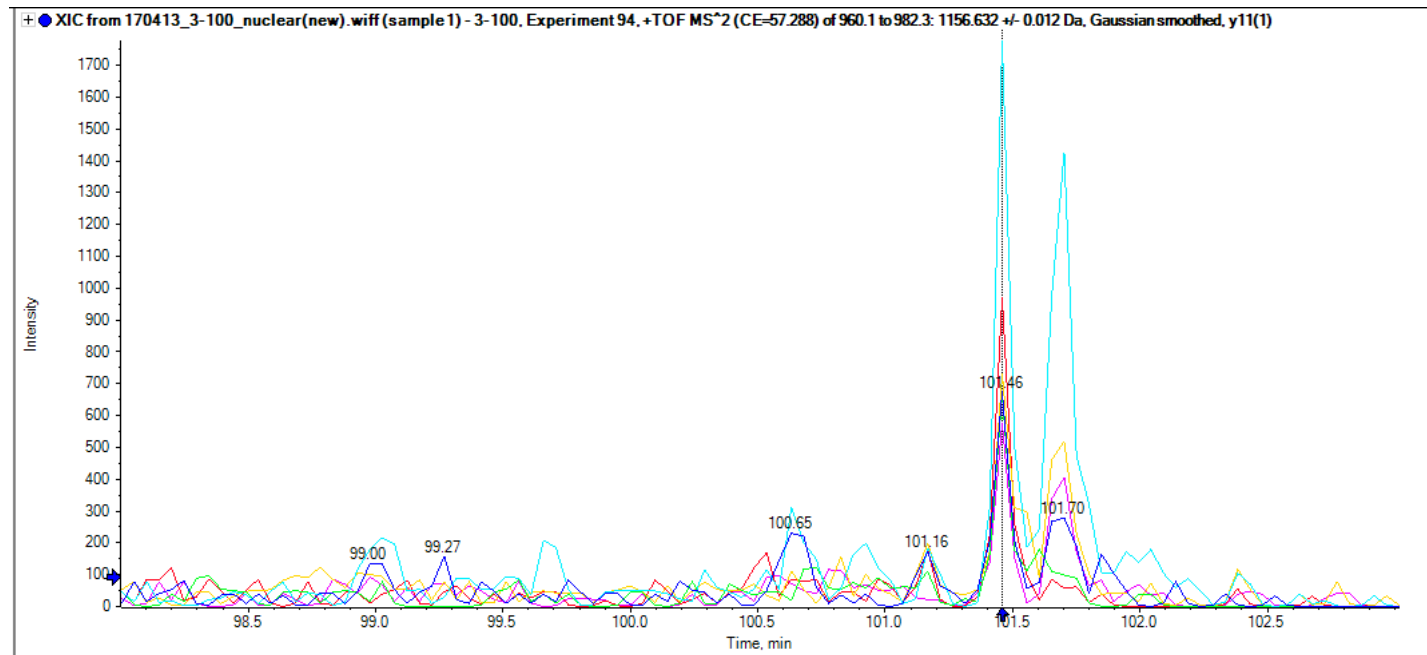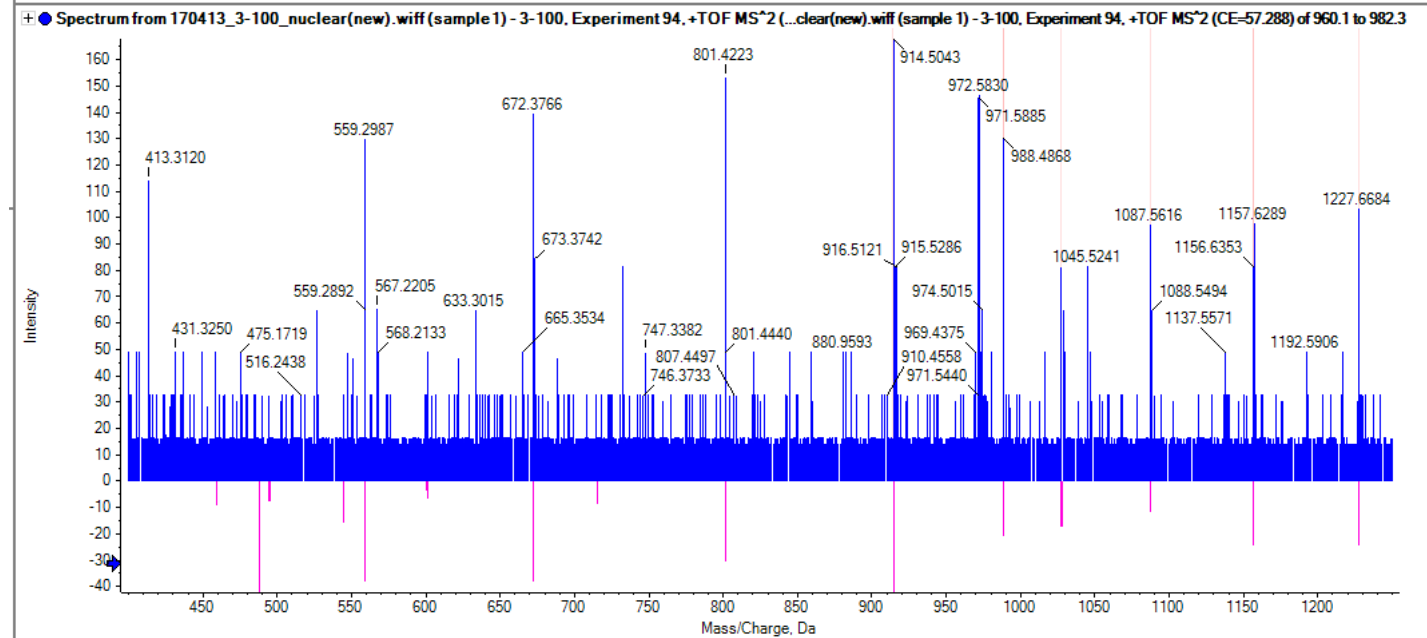

sp|Q8NEB7|ACRBP\_HUMAN

YMEEEILGFGK

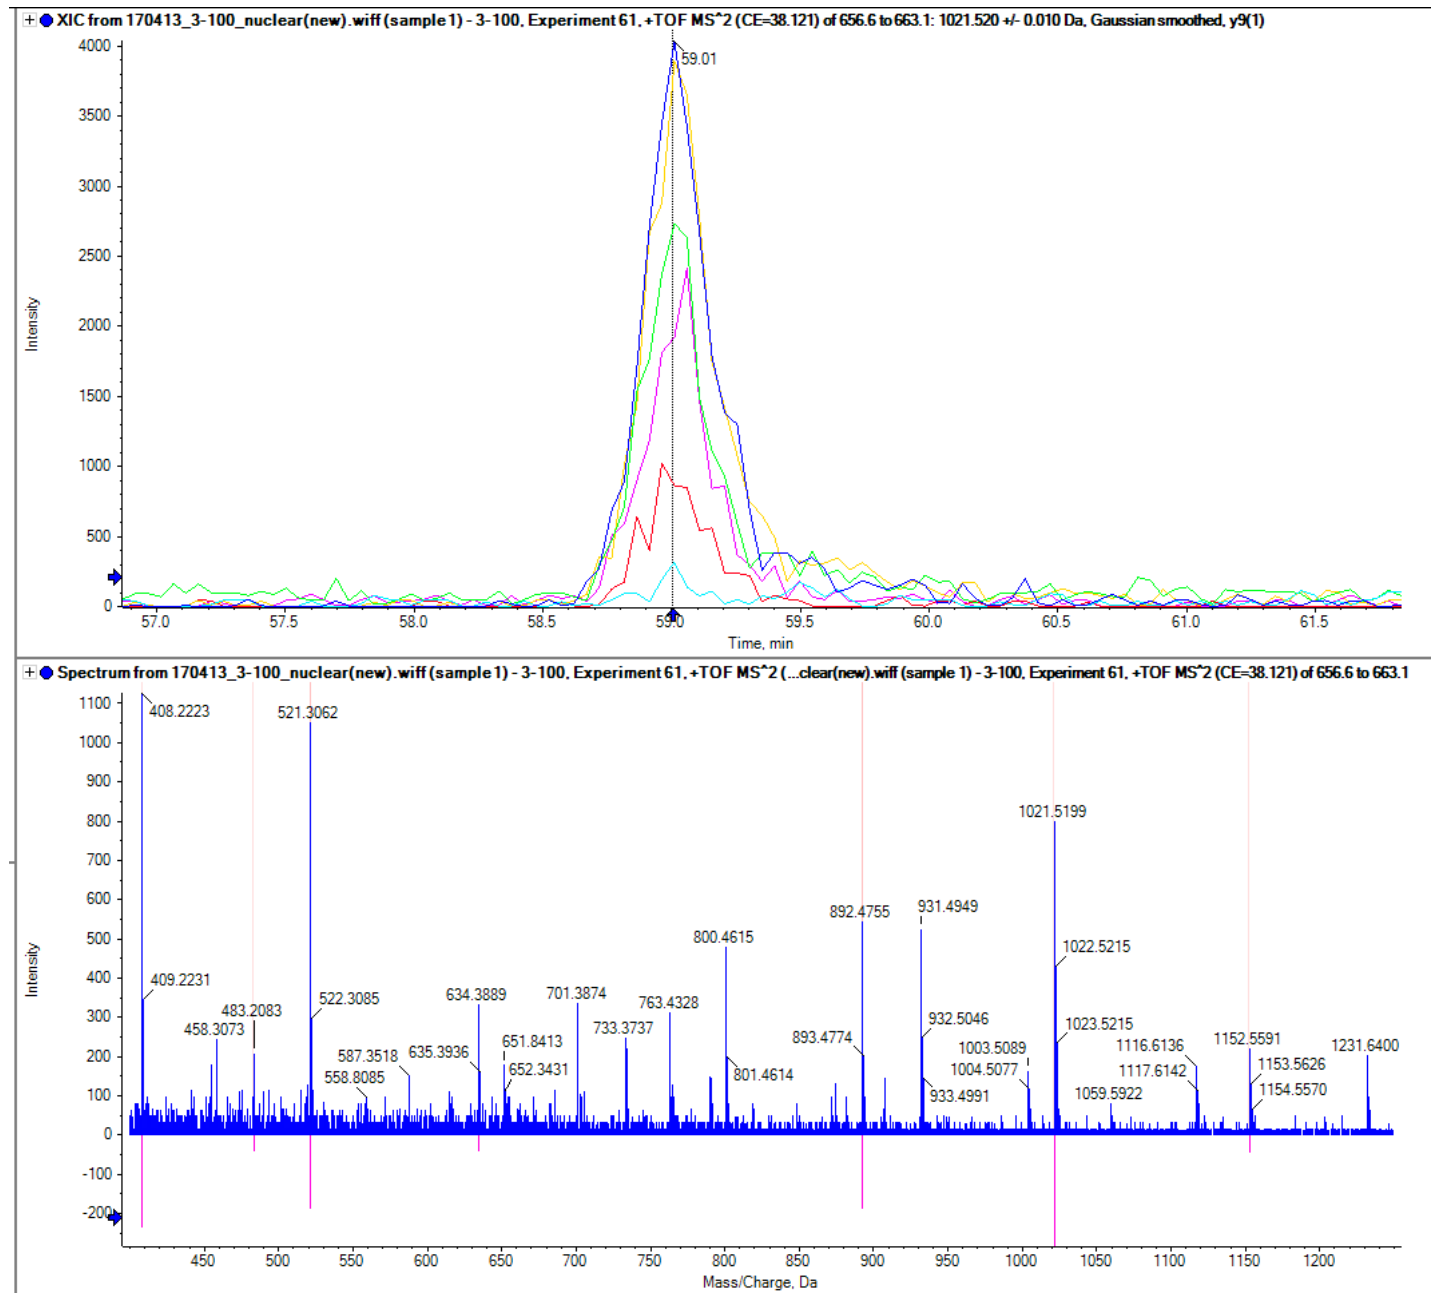

Transducin beta-like protein 2  
LQQQLTQAQETLK

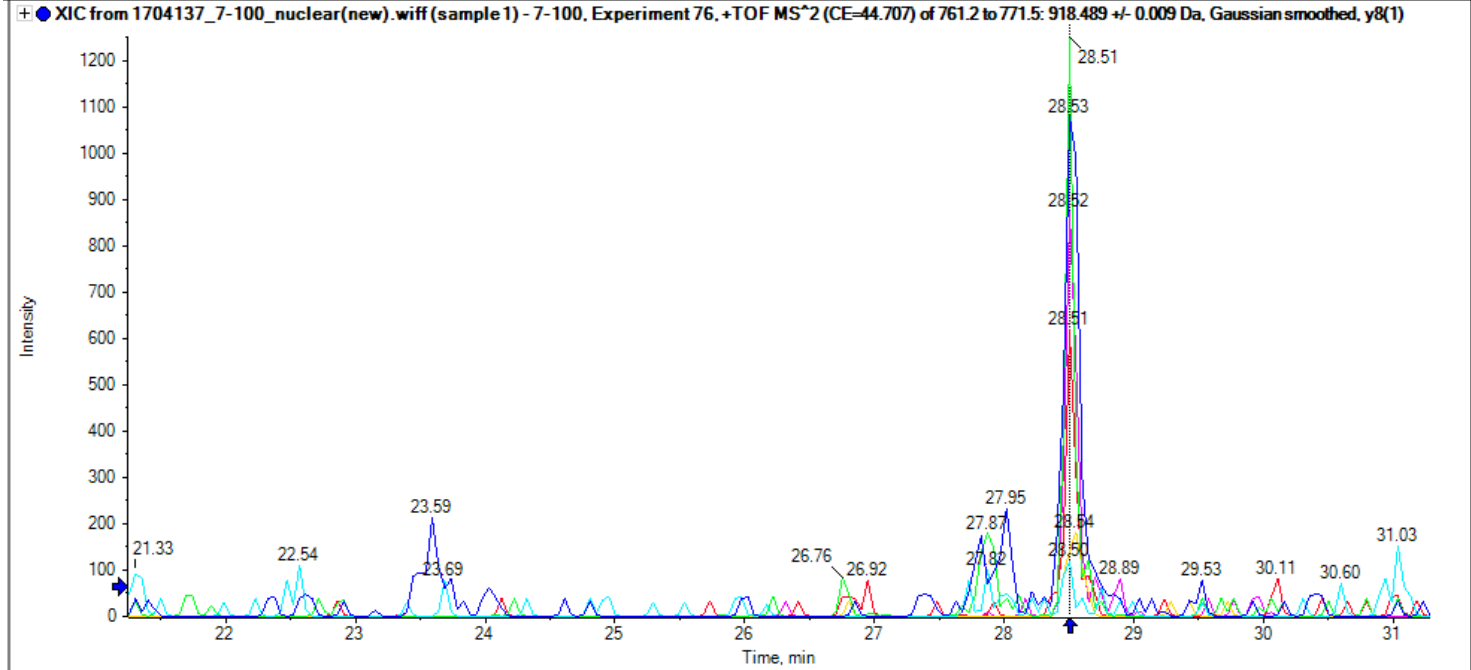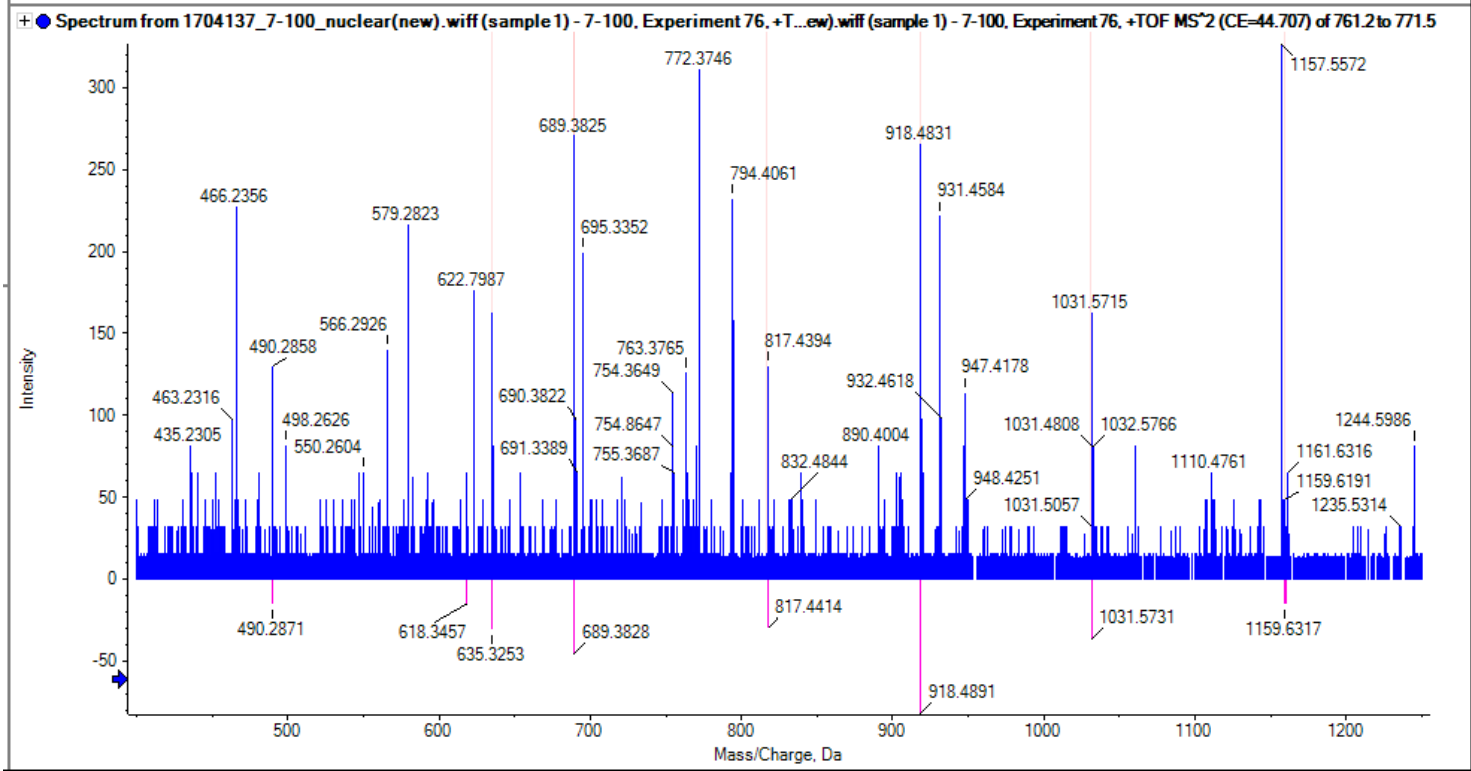

sp|P46926|GNPI1\_HUMAN

TFNMDEYVGLPR

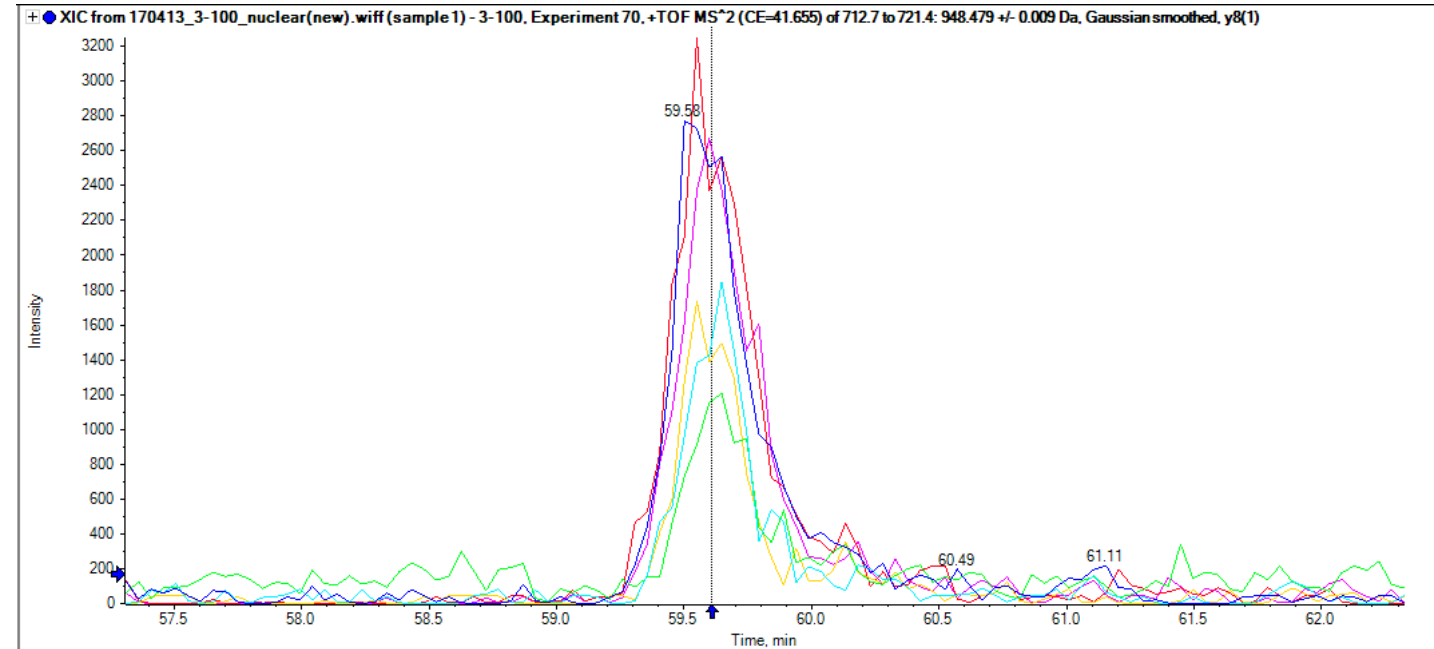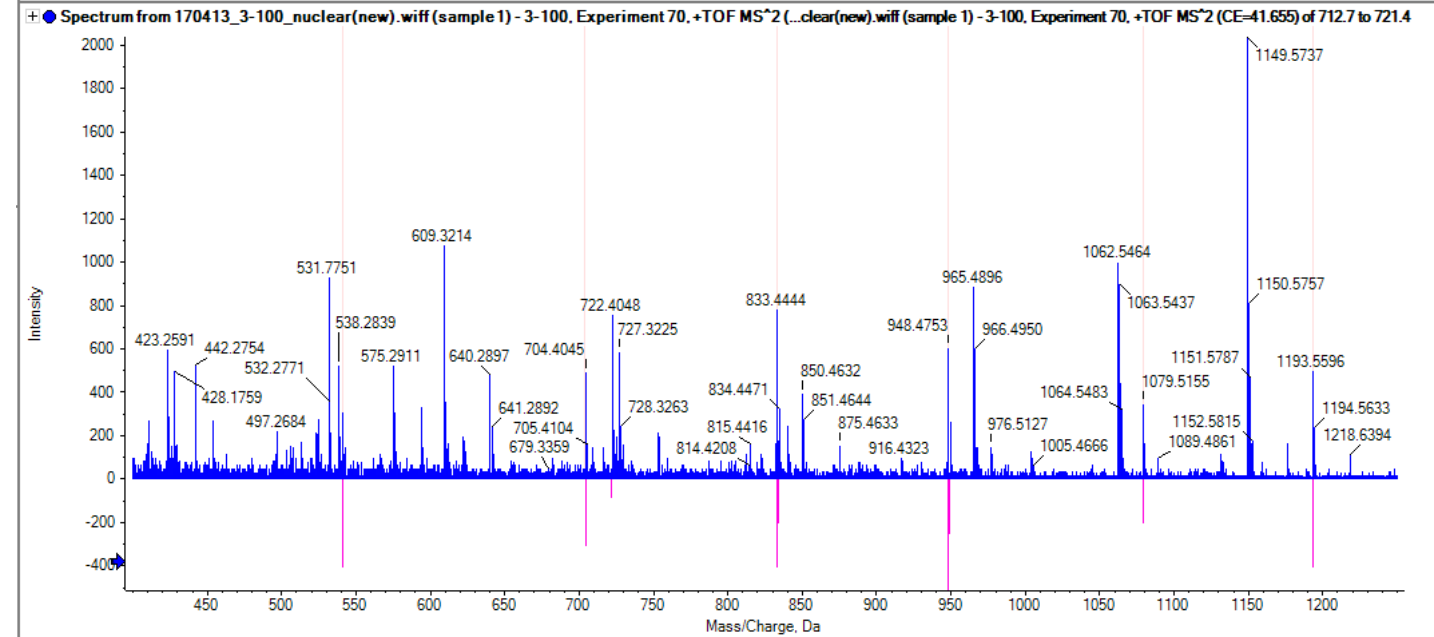

# Leucine-rich repeat transmembrane protein QPDIKNPKLTK

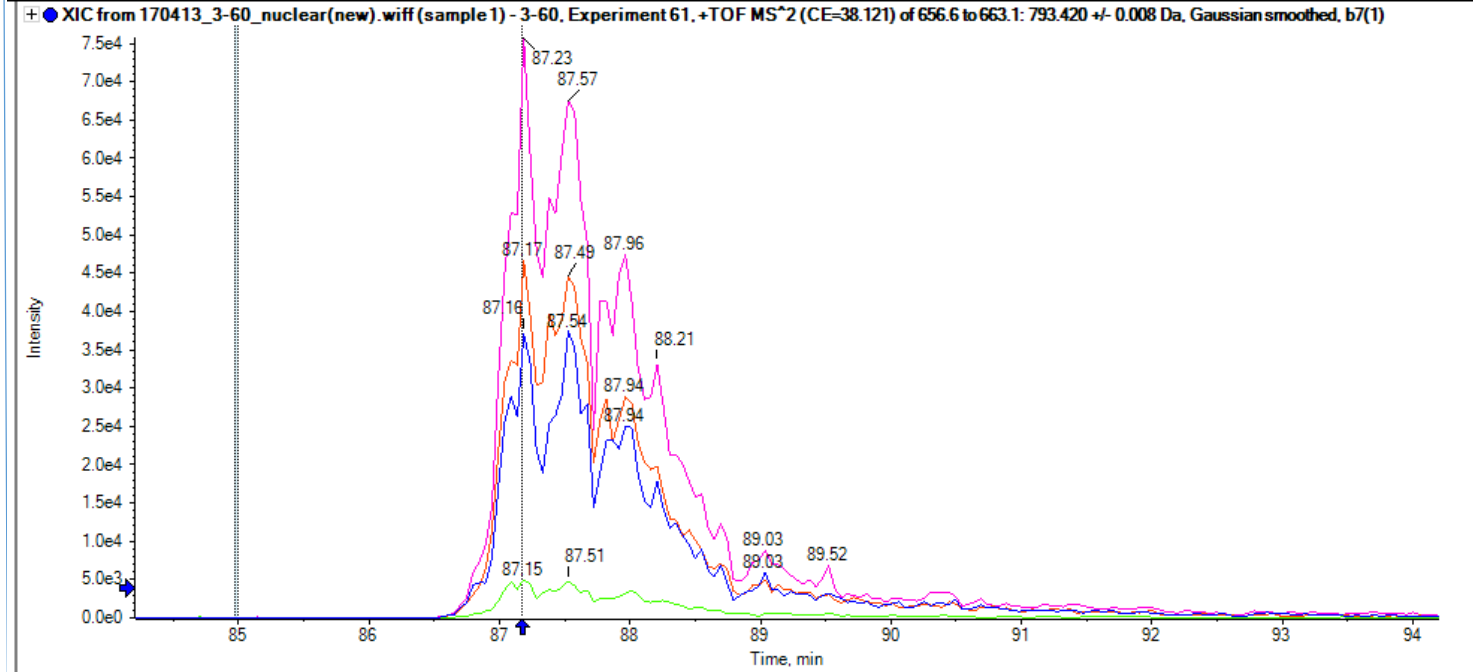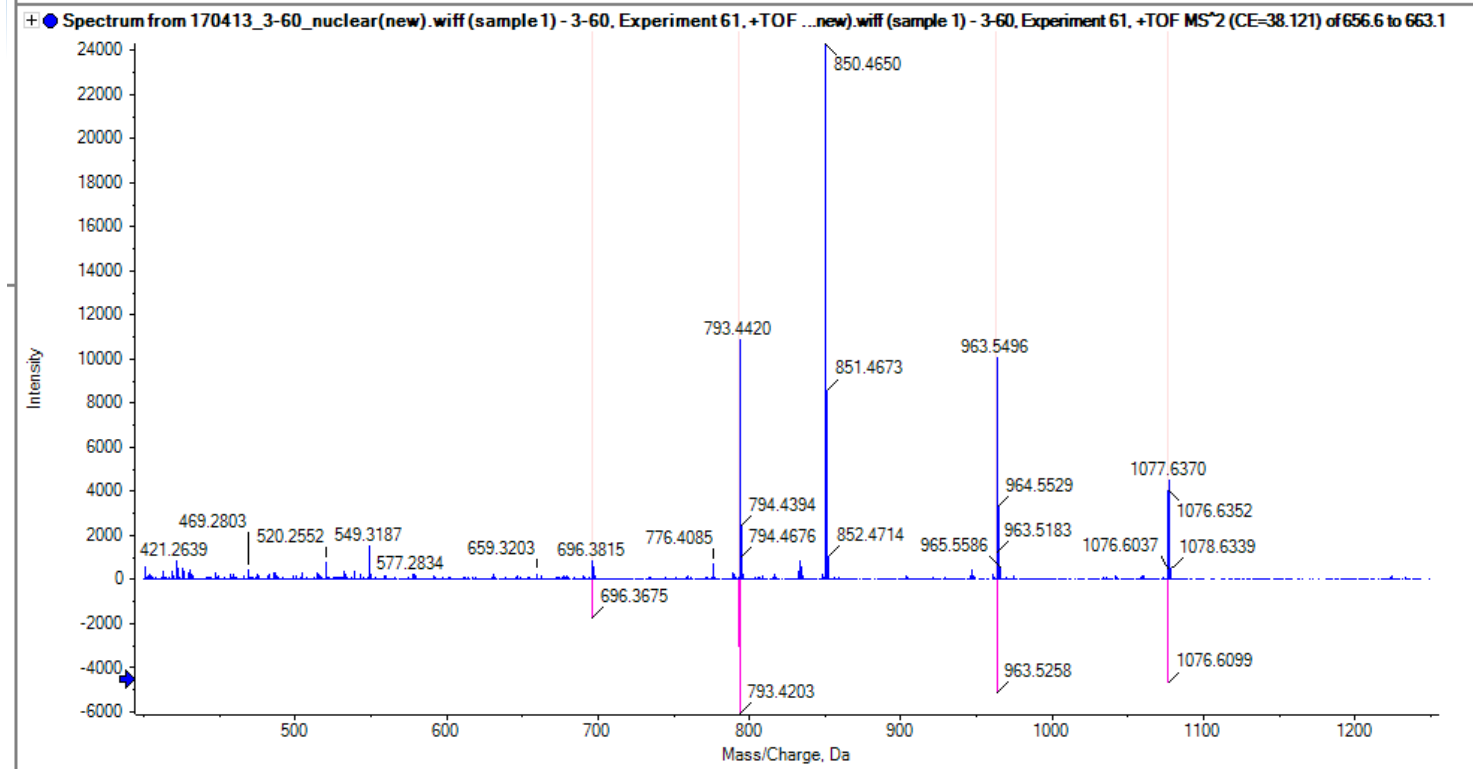

Uncharacterized protein C7orf31  
DLTSIYDIKPFPK

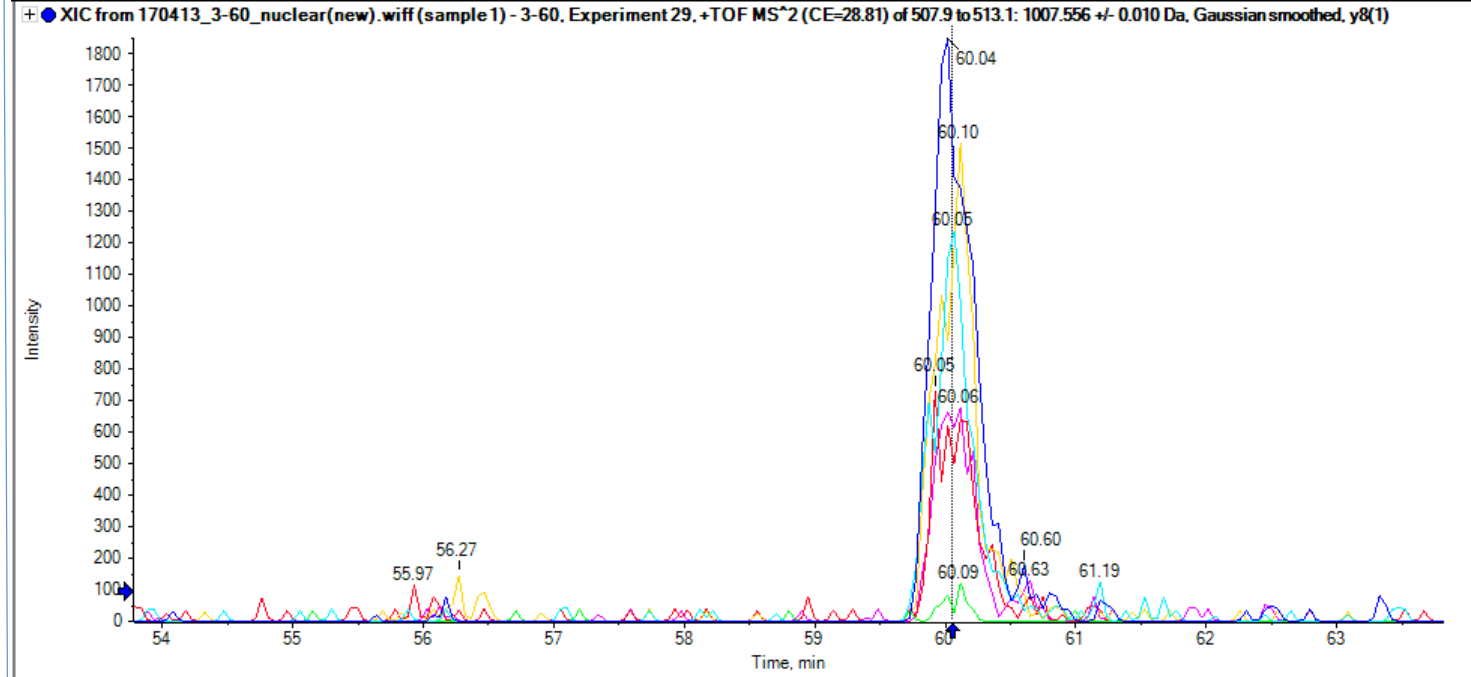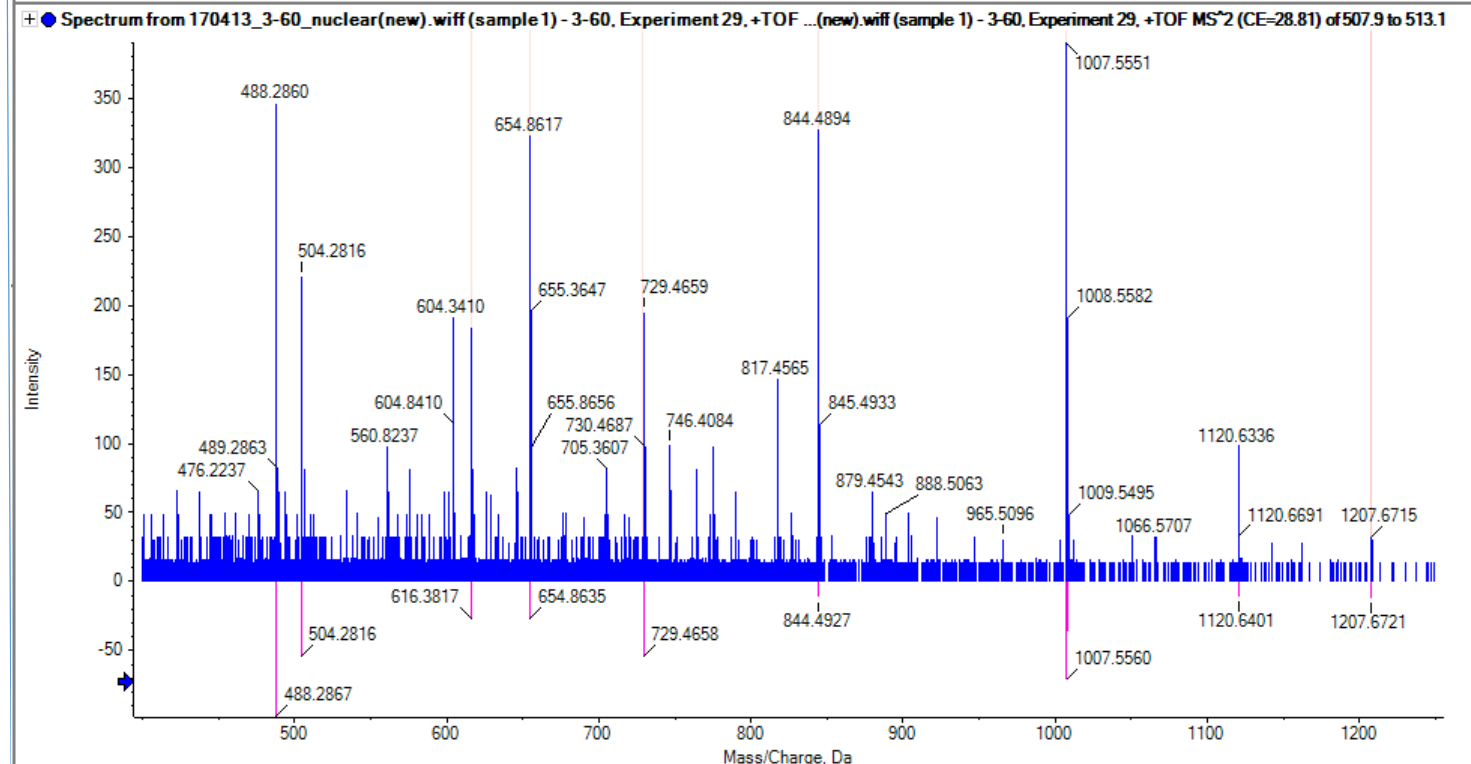

# Serine/arginine-rich splicing factor 7 AFSYYGPLR

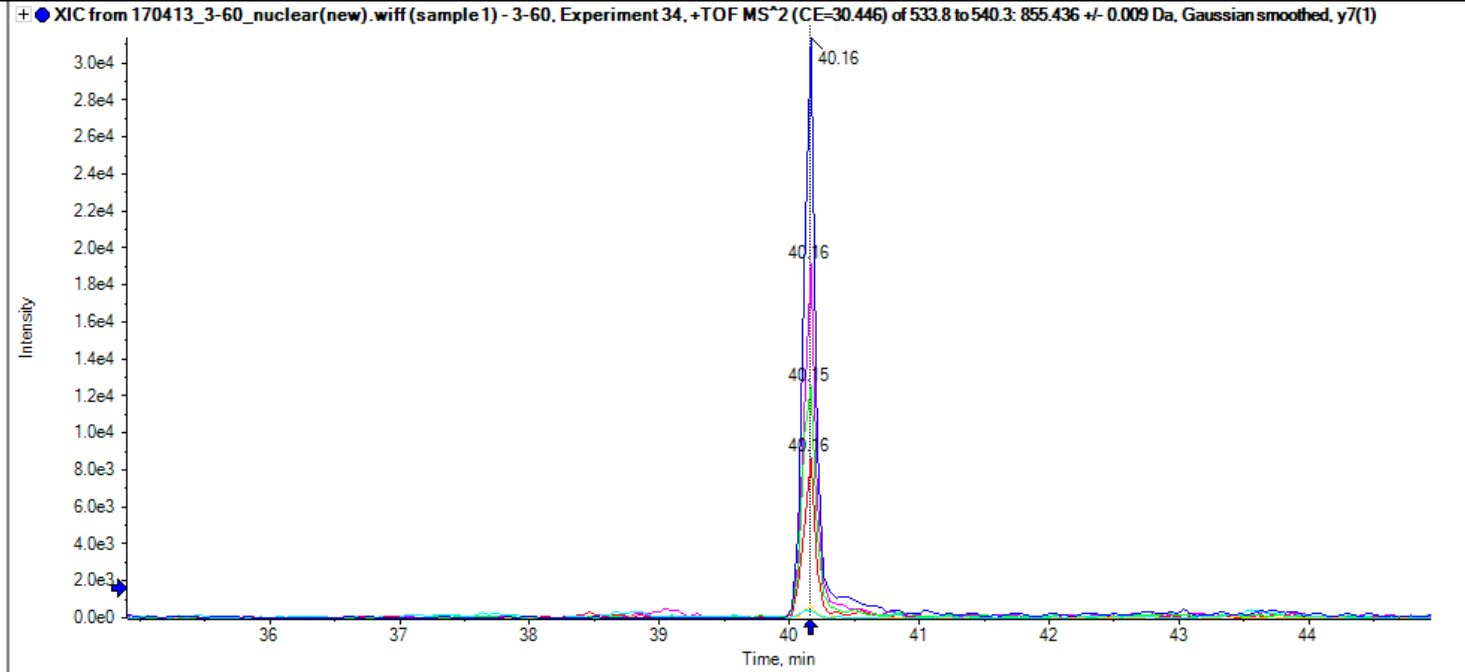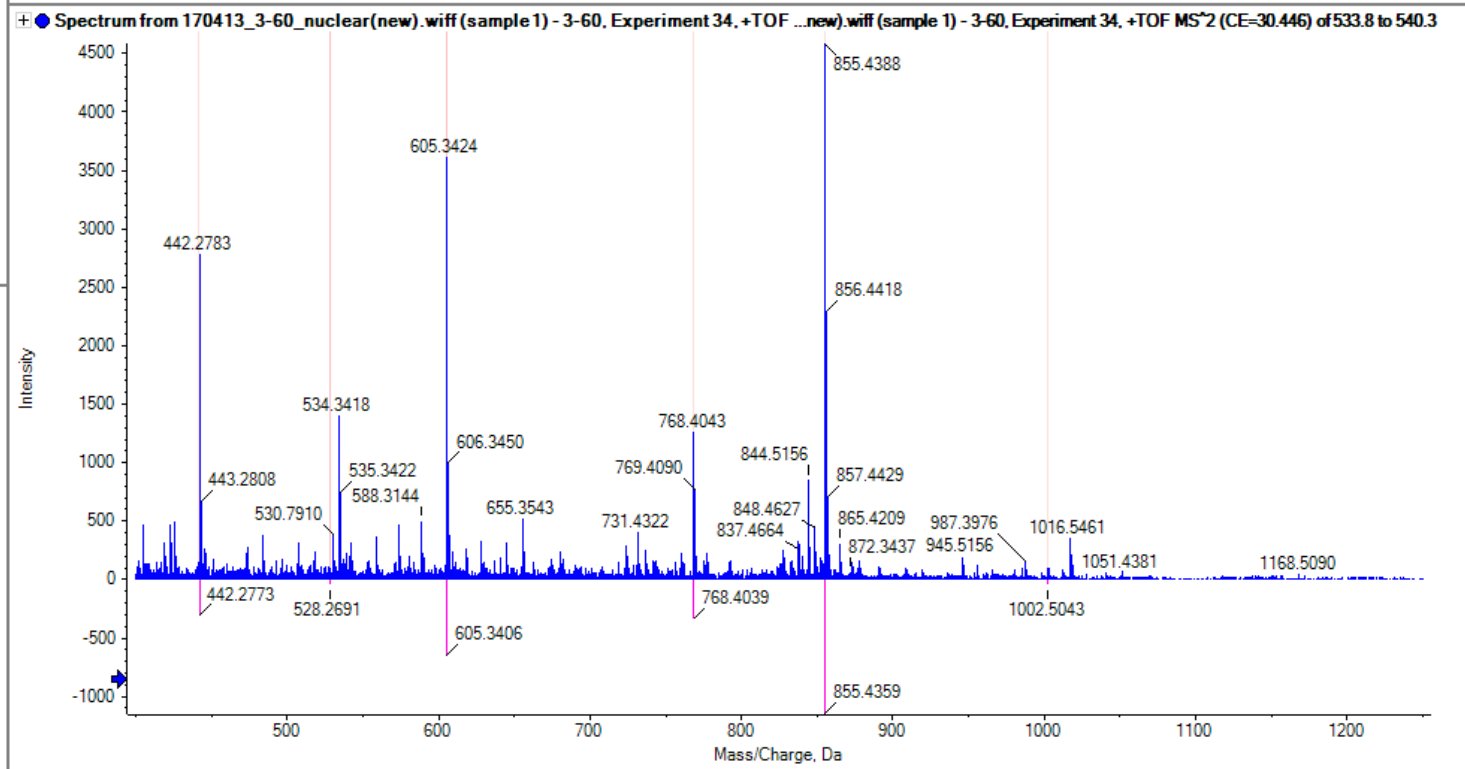



sp|P61313|RL15\_HUMAN

RNPDTQWITKPVHK

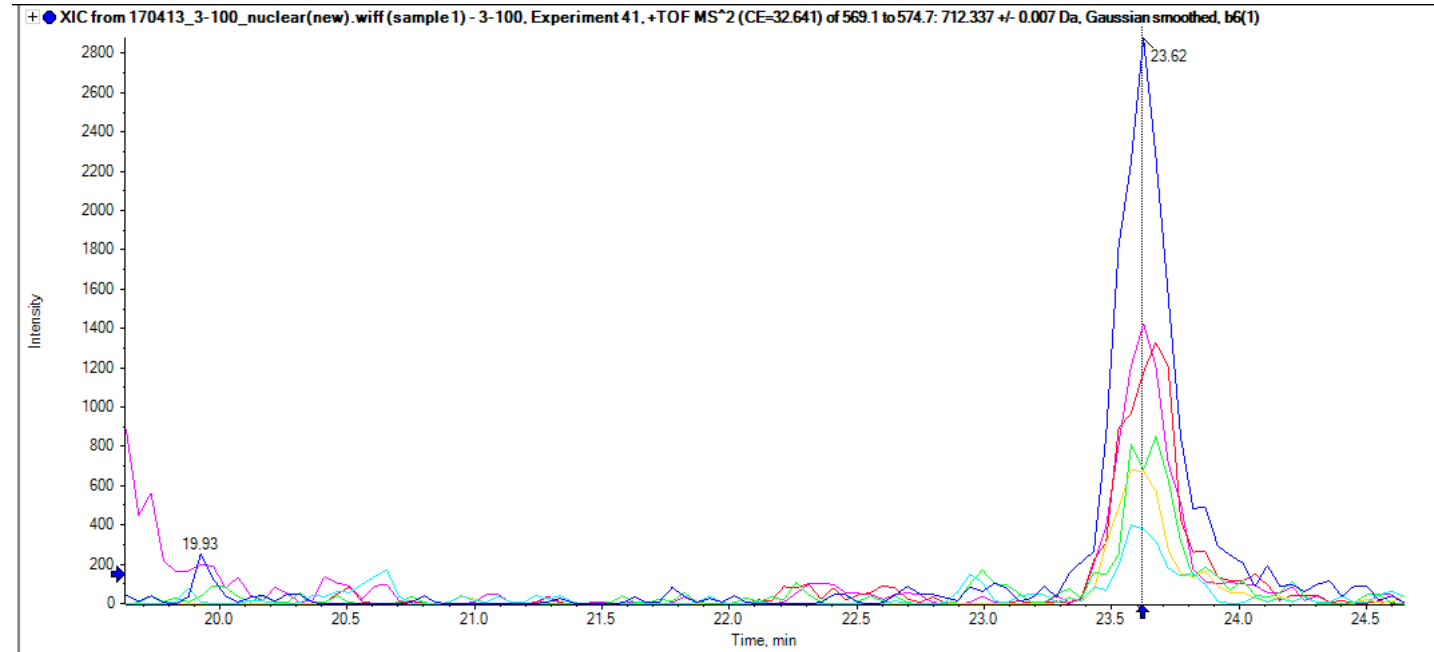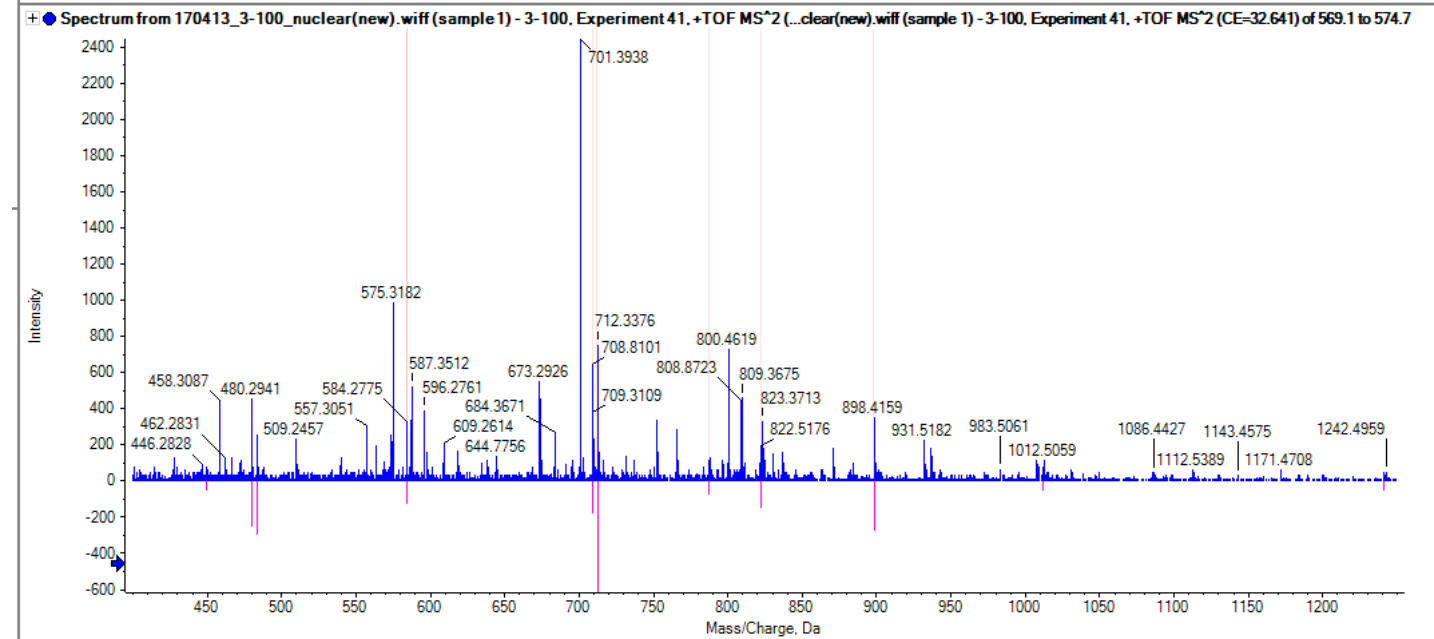

# Zona pellucida-binding protein 2 DRIEDFFR

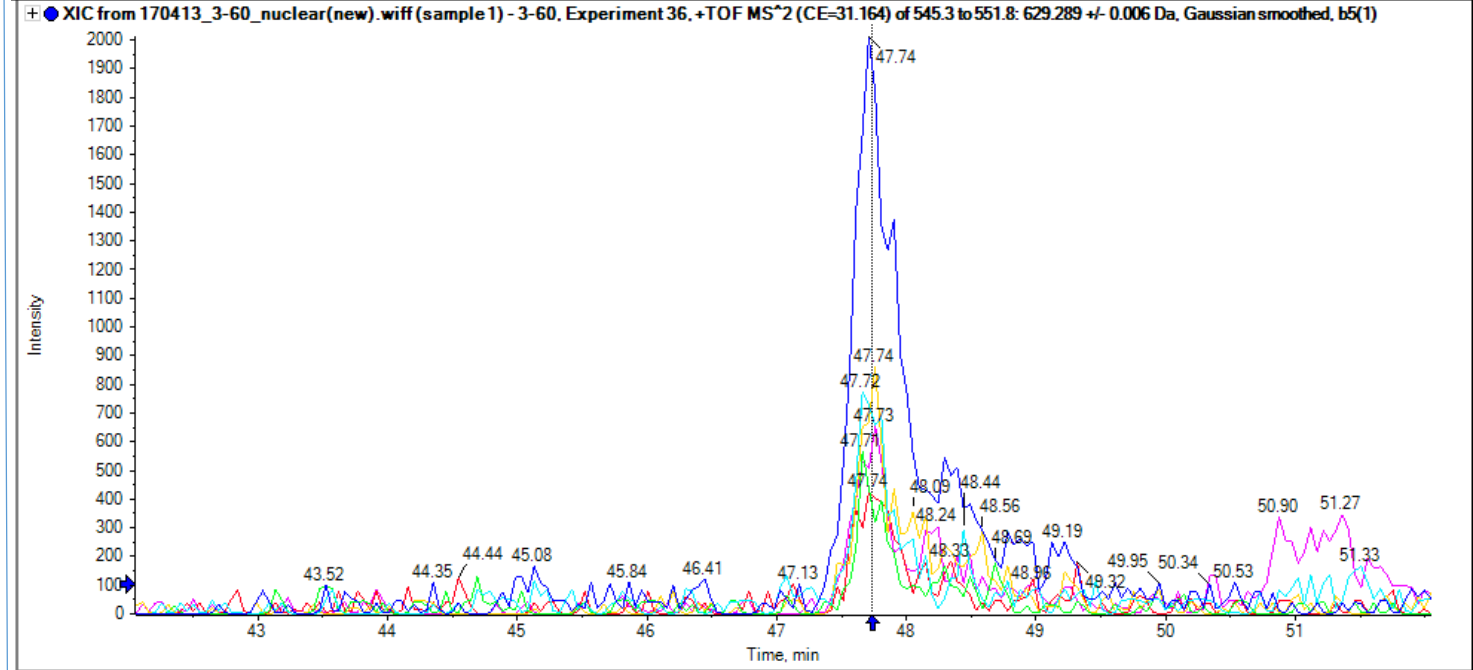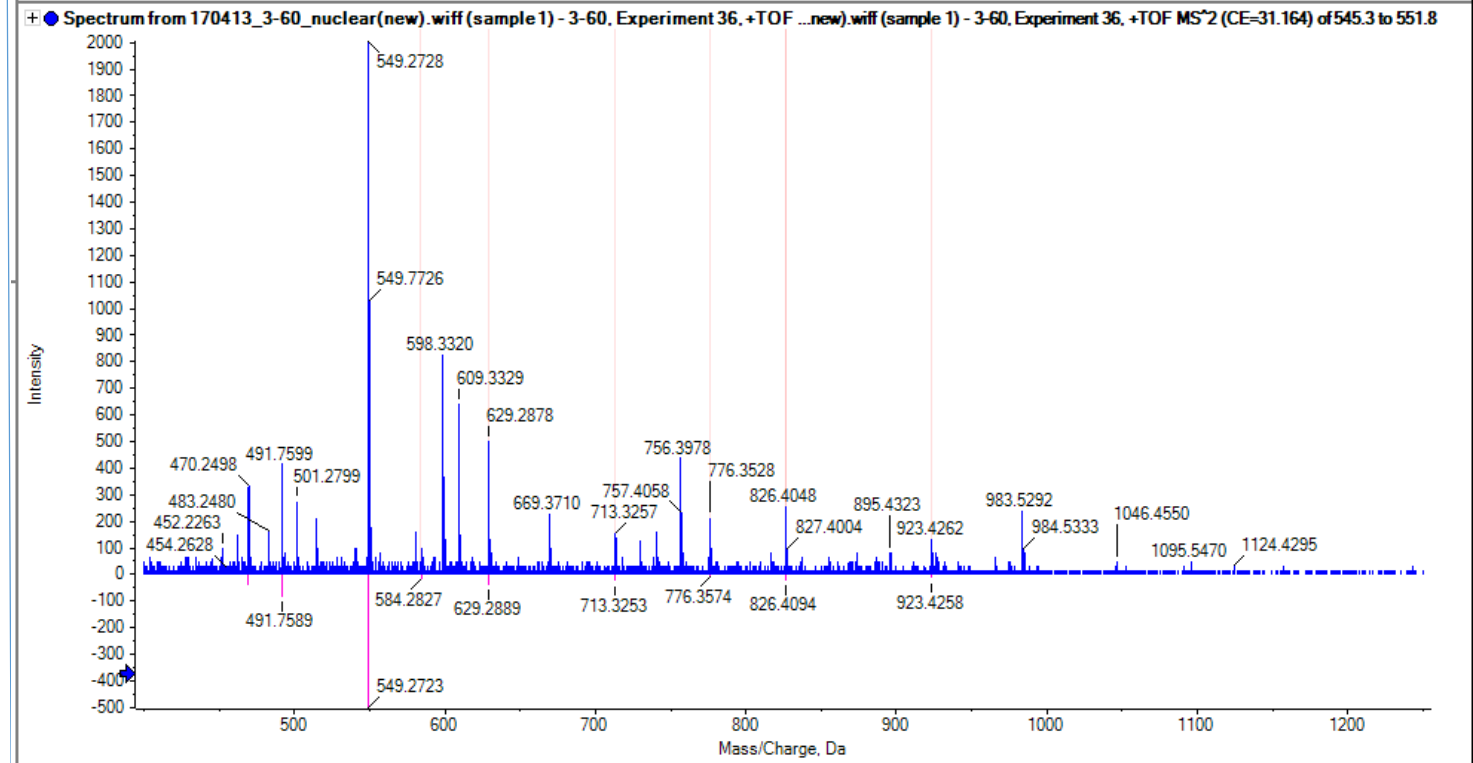

sp|P10323|ACRO\_HUMAN

RPGIYTATWPYLNWIASK

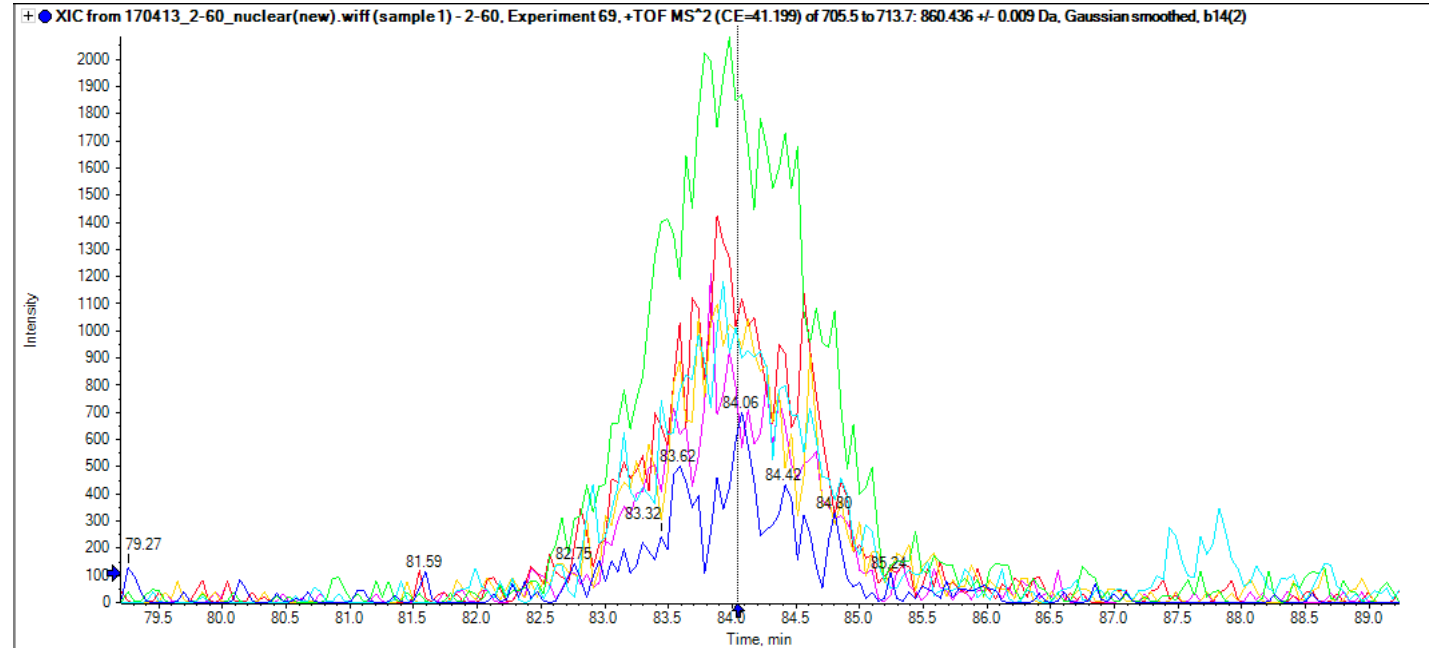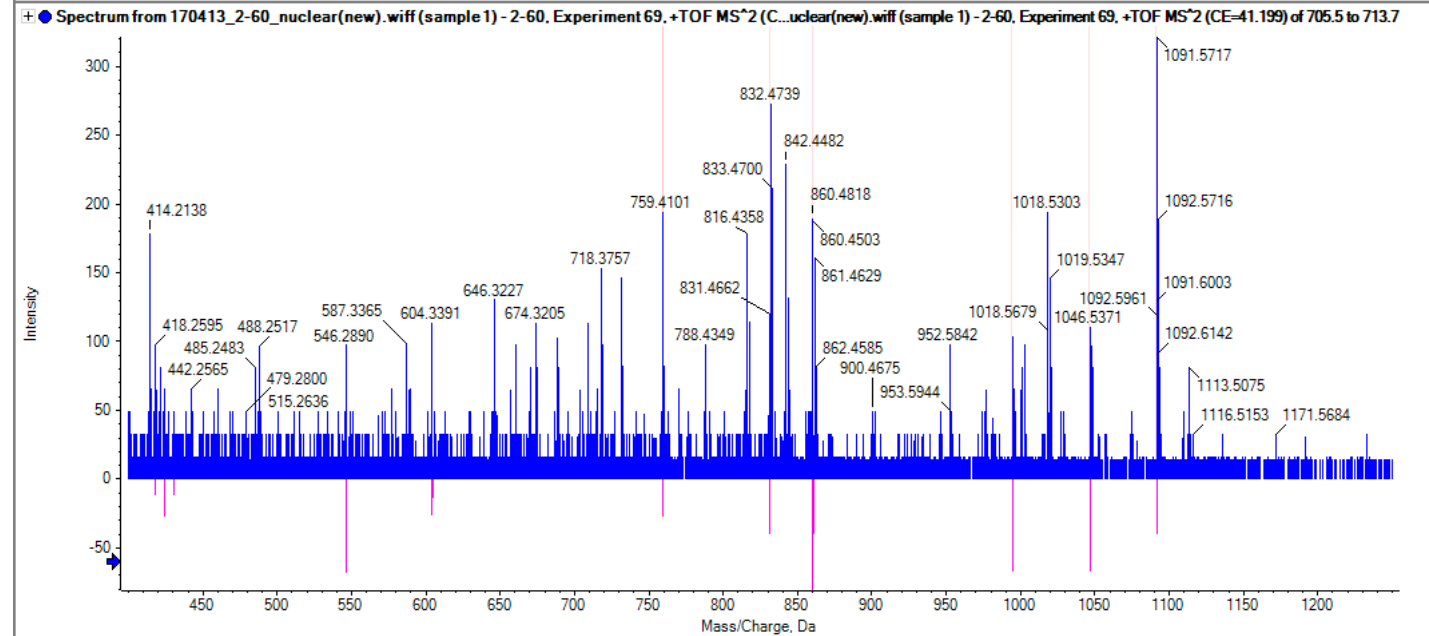

Plakophilin-1  
SPNQNVQQAAAGALR

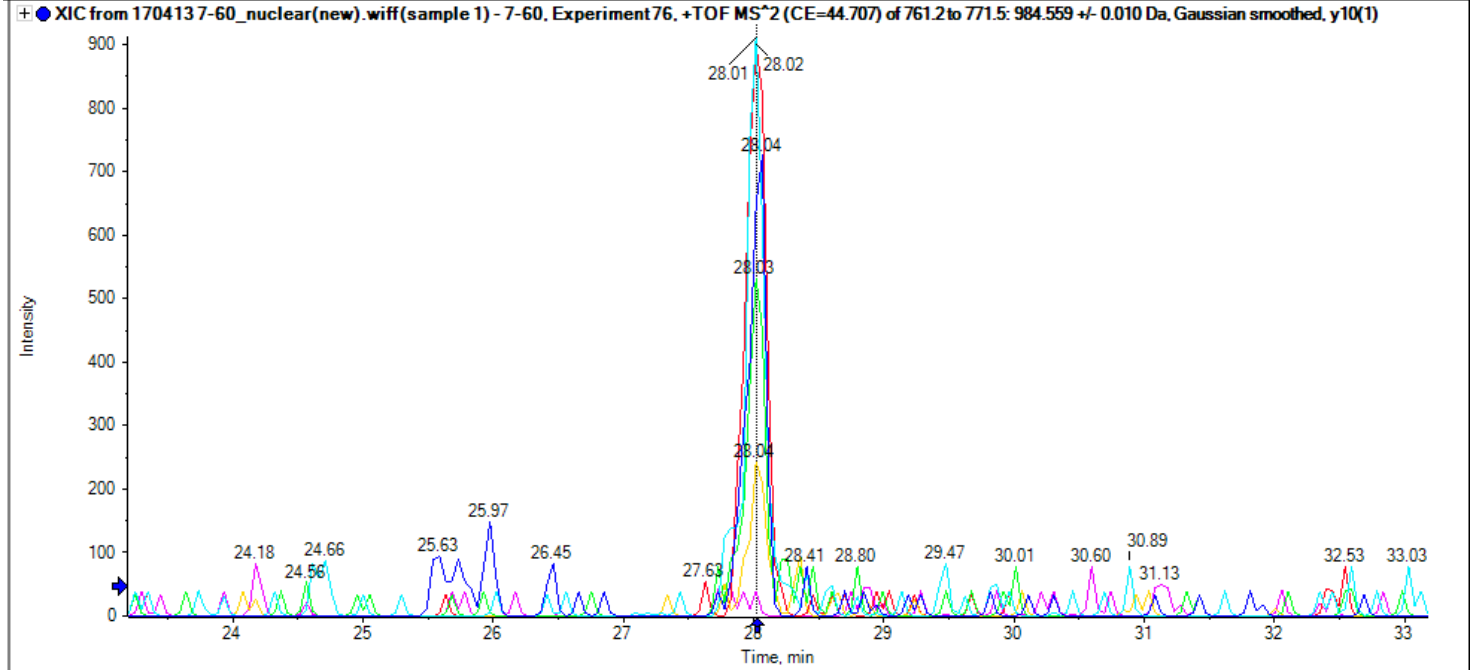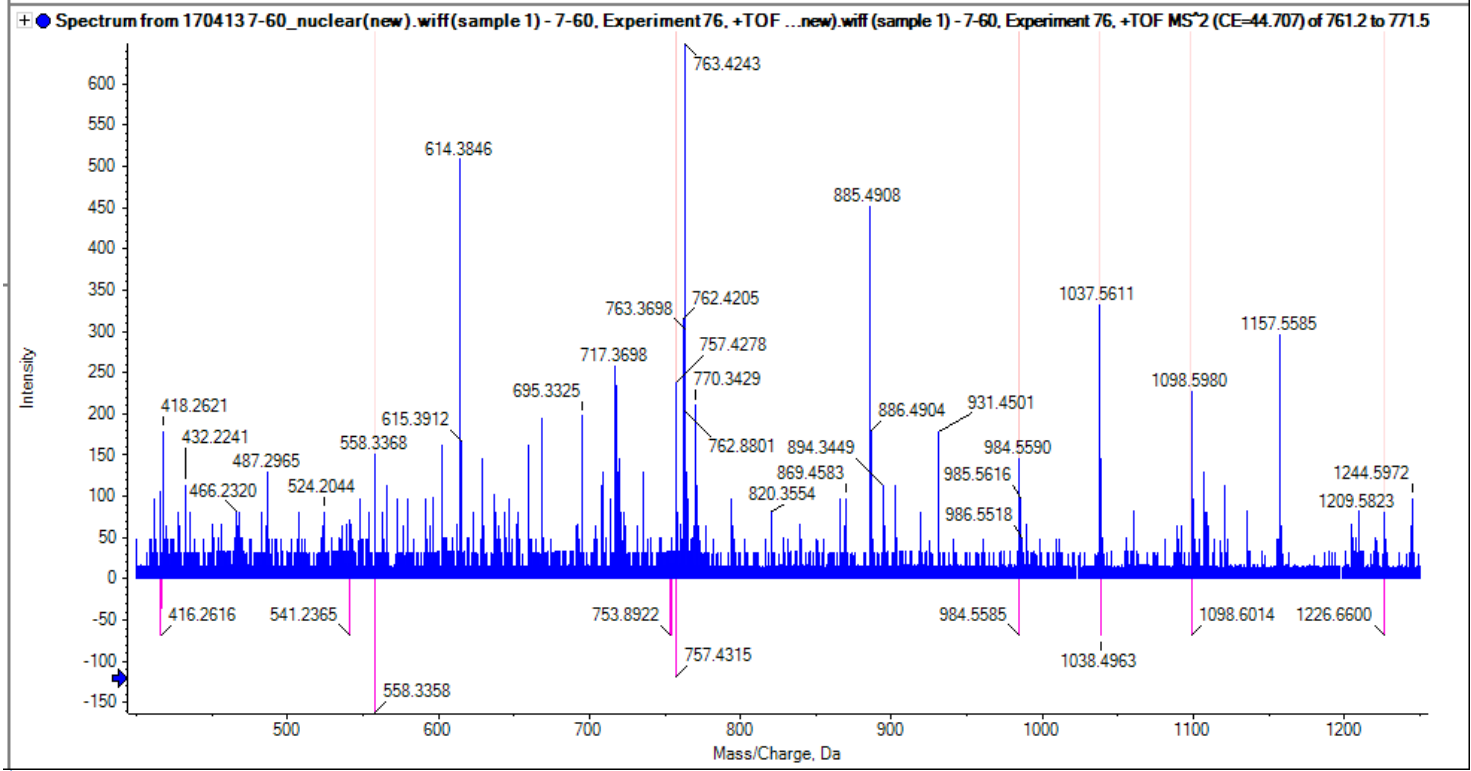

sp|P20930|FILAHUMAN  
HTQTSSGGQAASSHEQAR

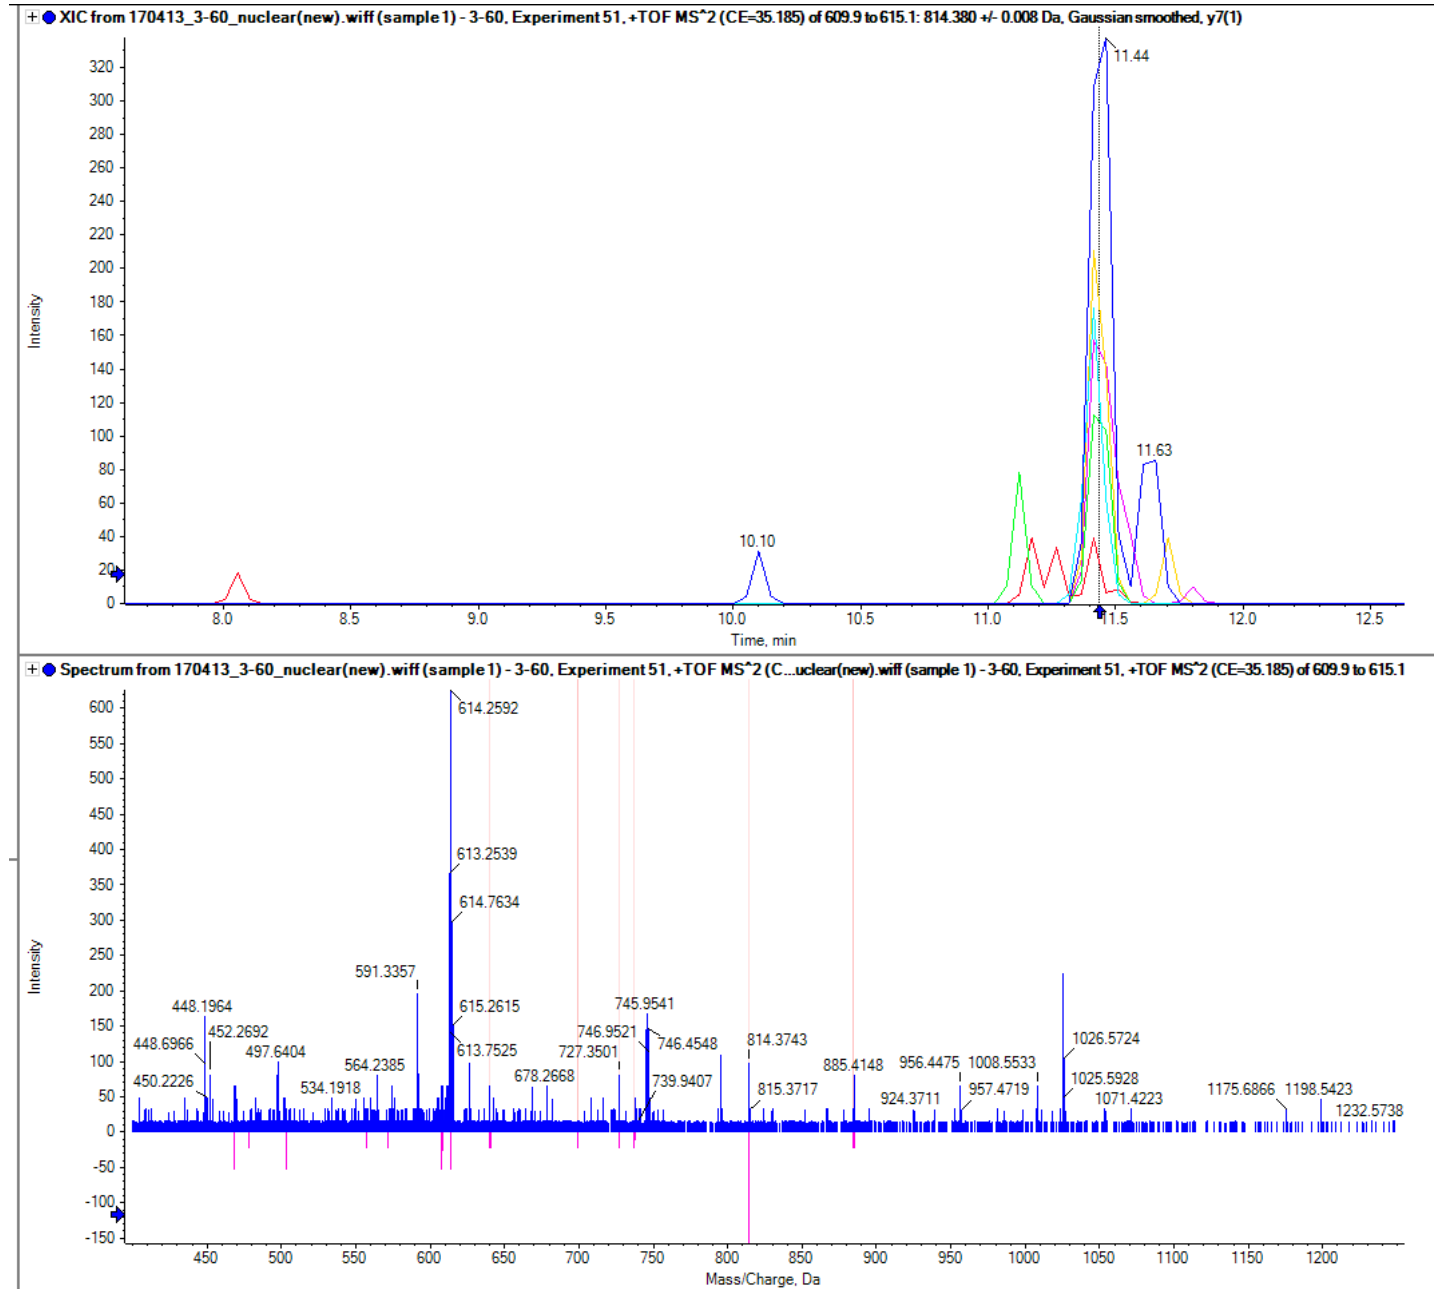

# Histone H2A-Bbd type 1 VPELAGNEAQNNGER

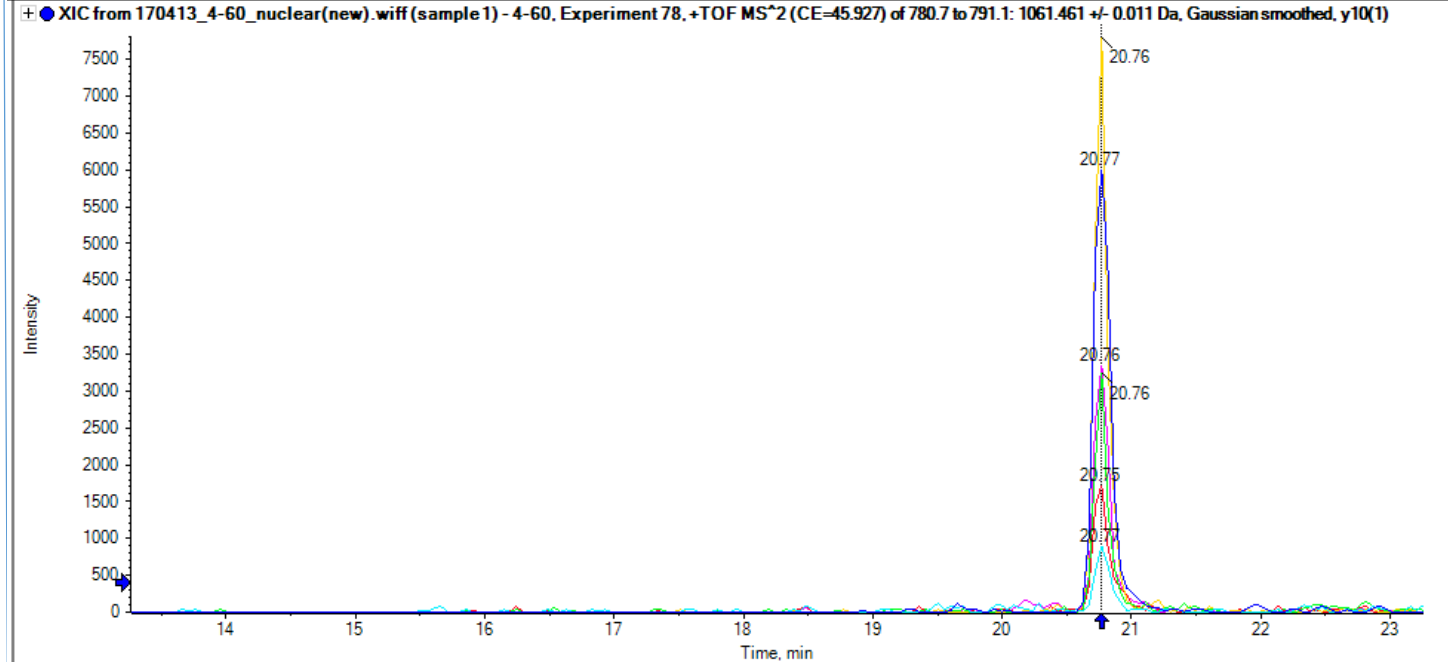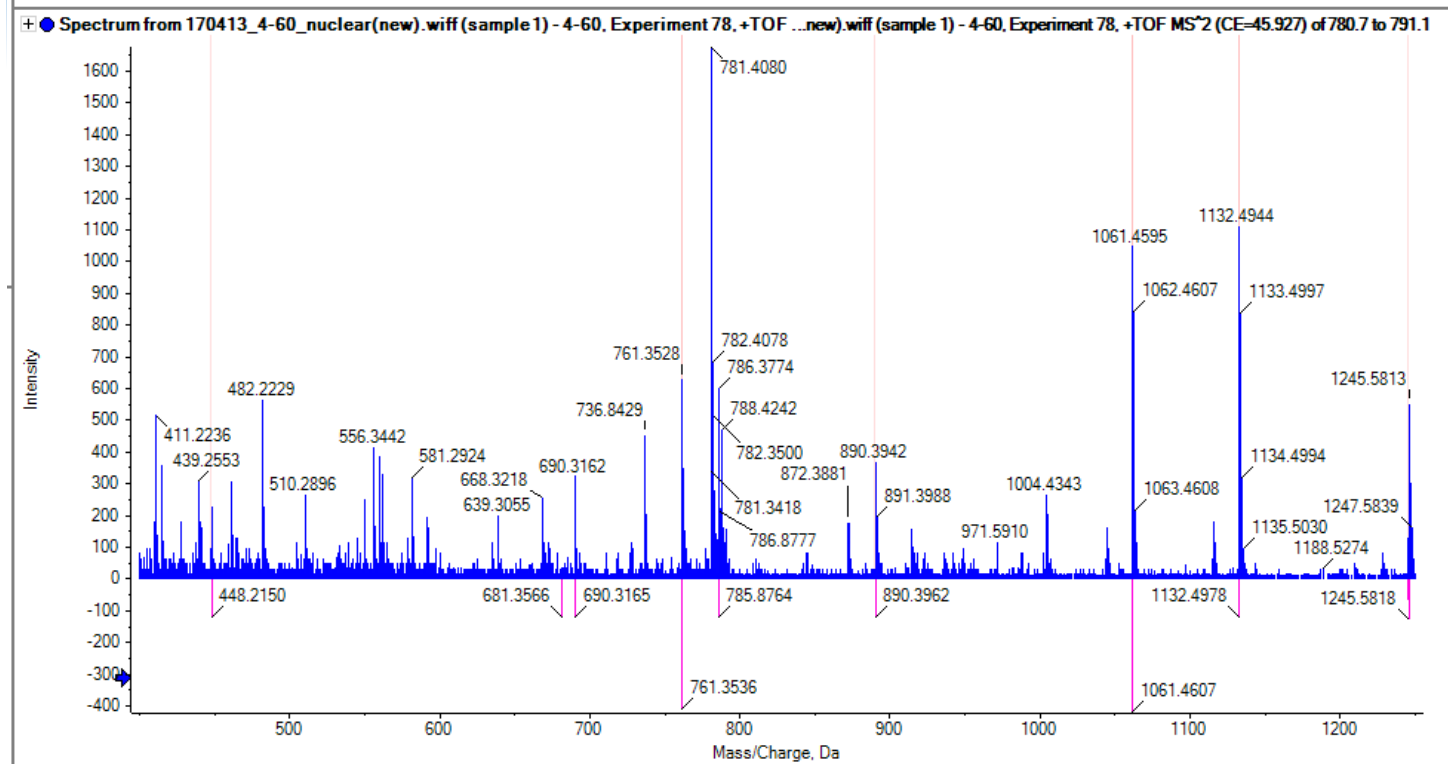

14-3-3 protein zeta/delta  
TAFDEAUAEKDTKSEESYK

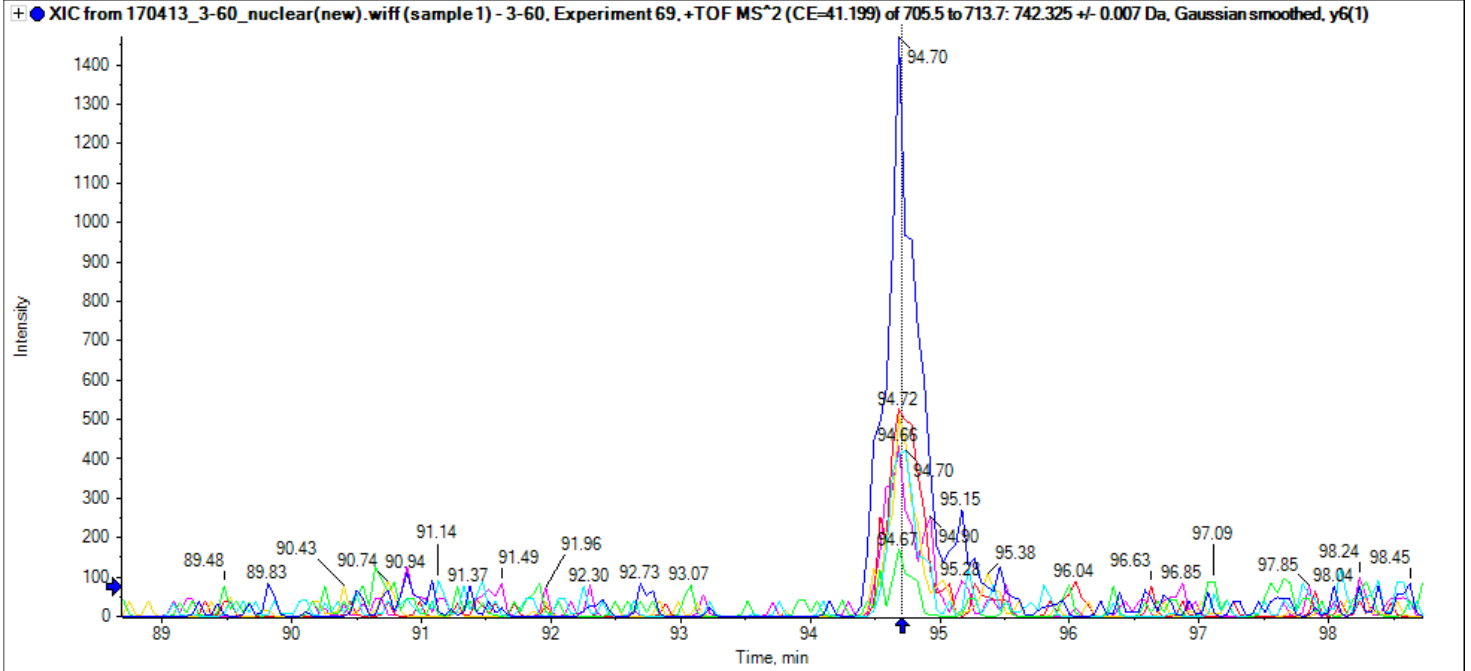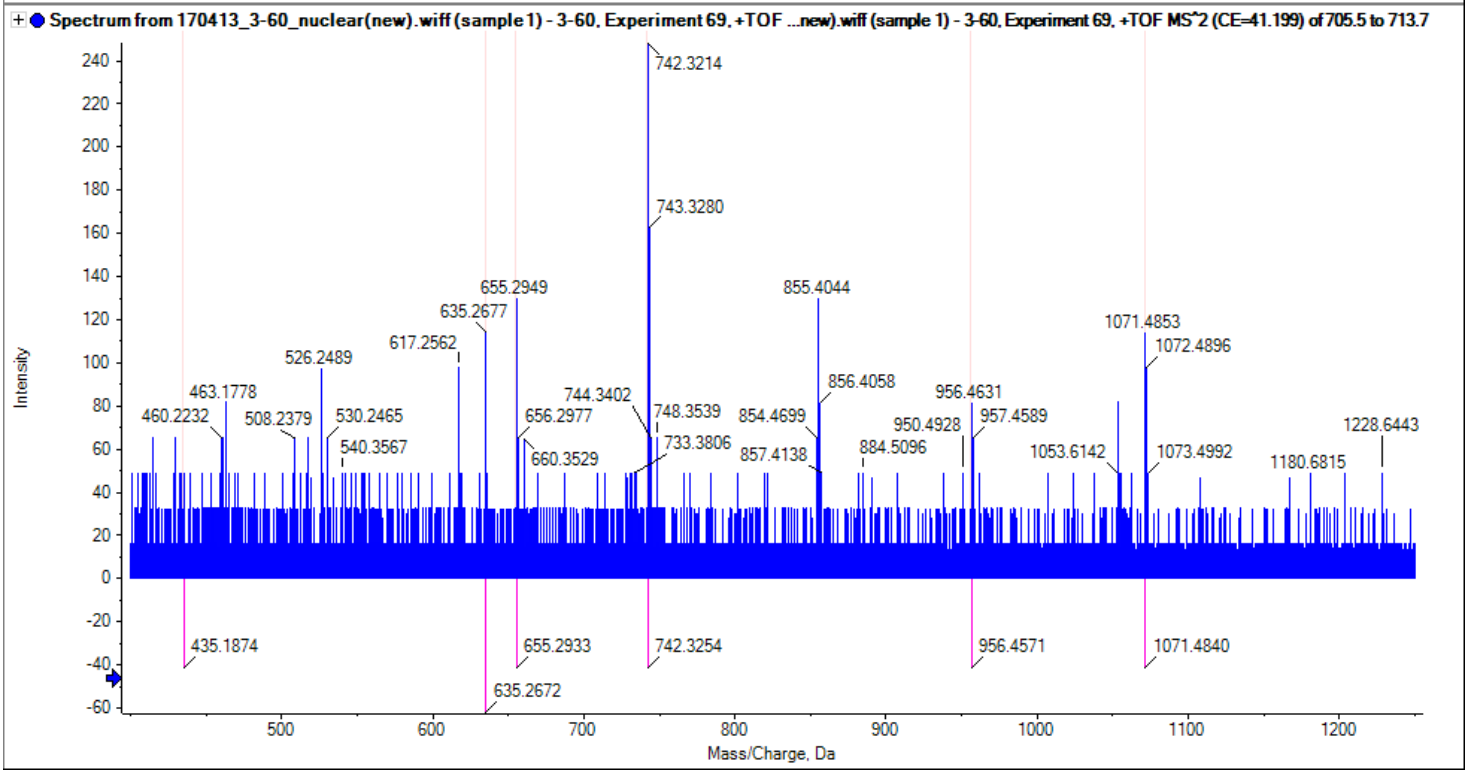

sp|P61353|RL27\_HUMAN  
VYNYNHLMPTR

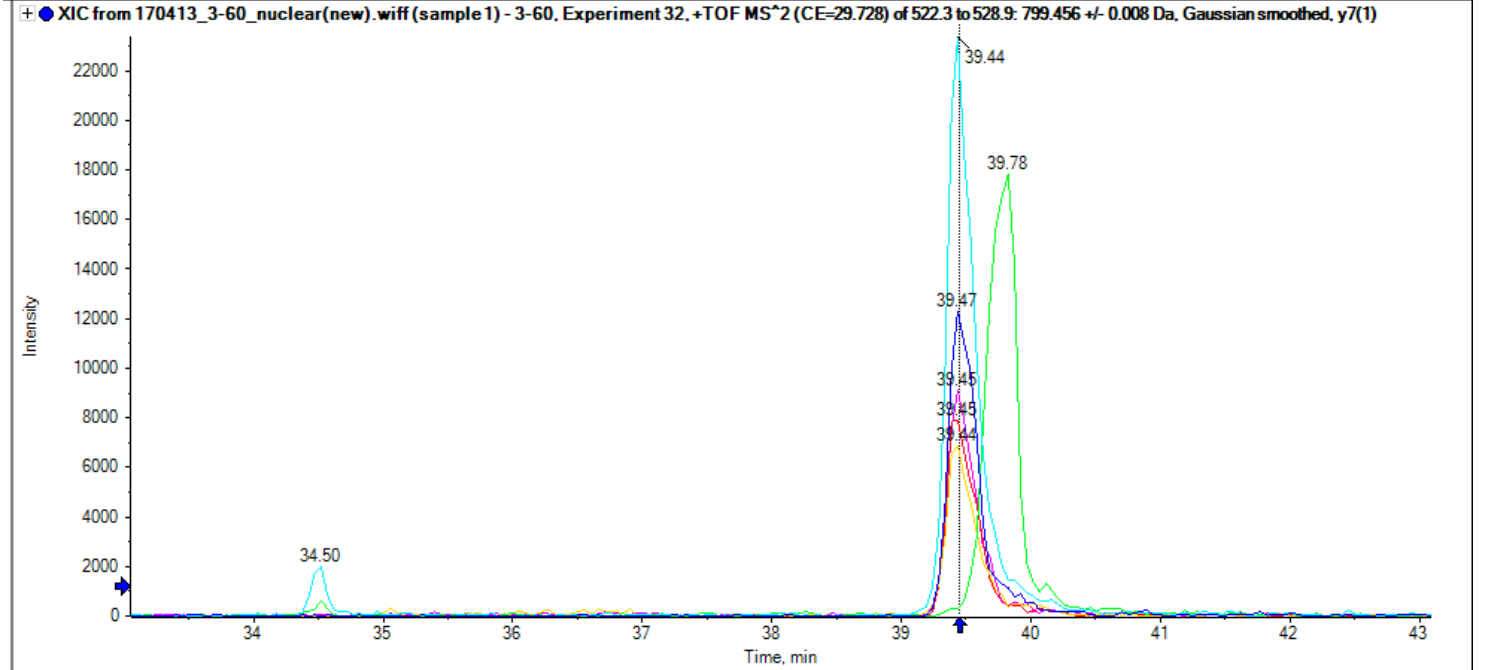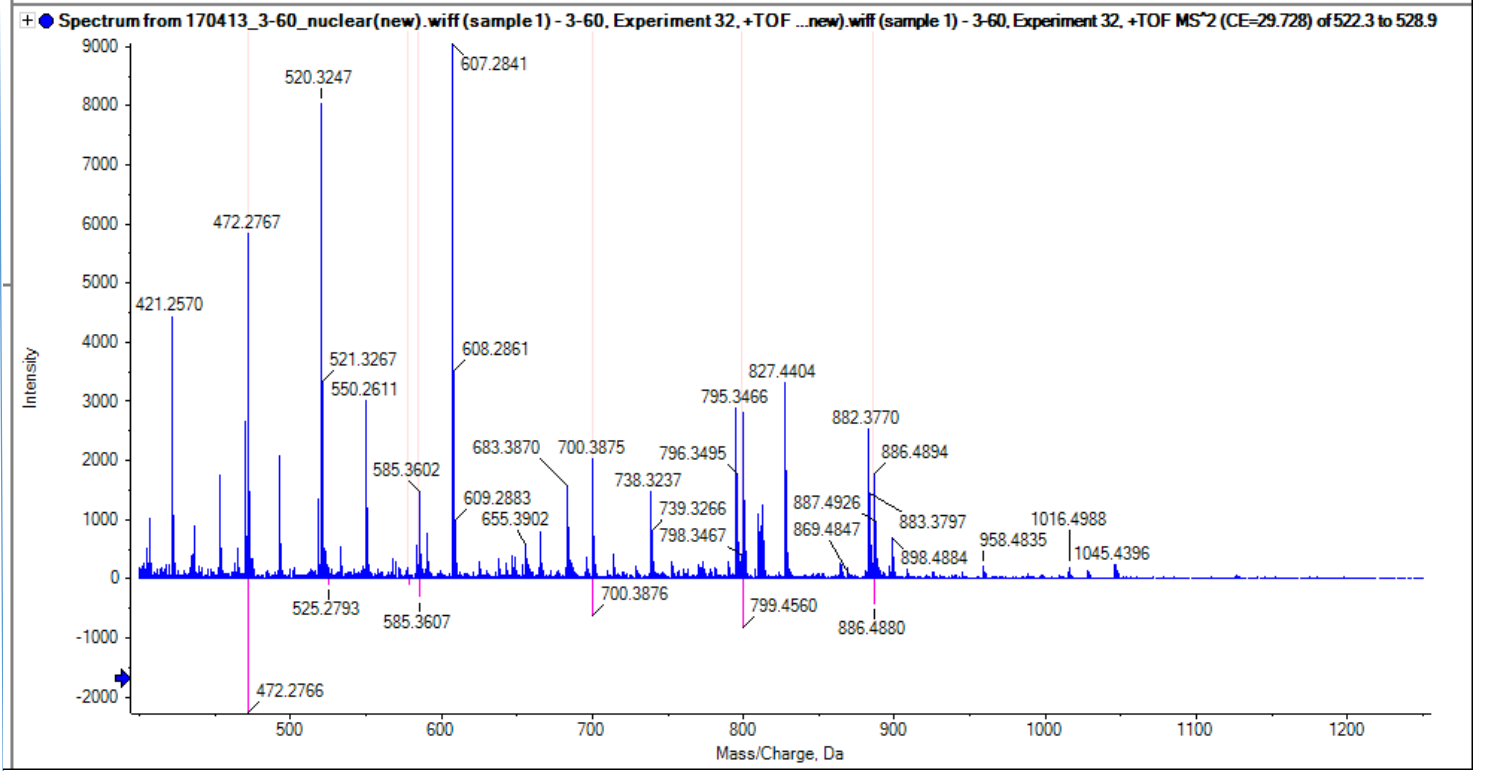



sp|Q969V4|TEKT1\_HUMAN  
ILTATVDNANILLQIDNAR

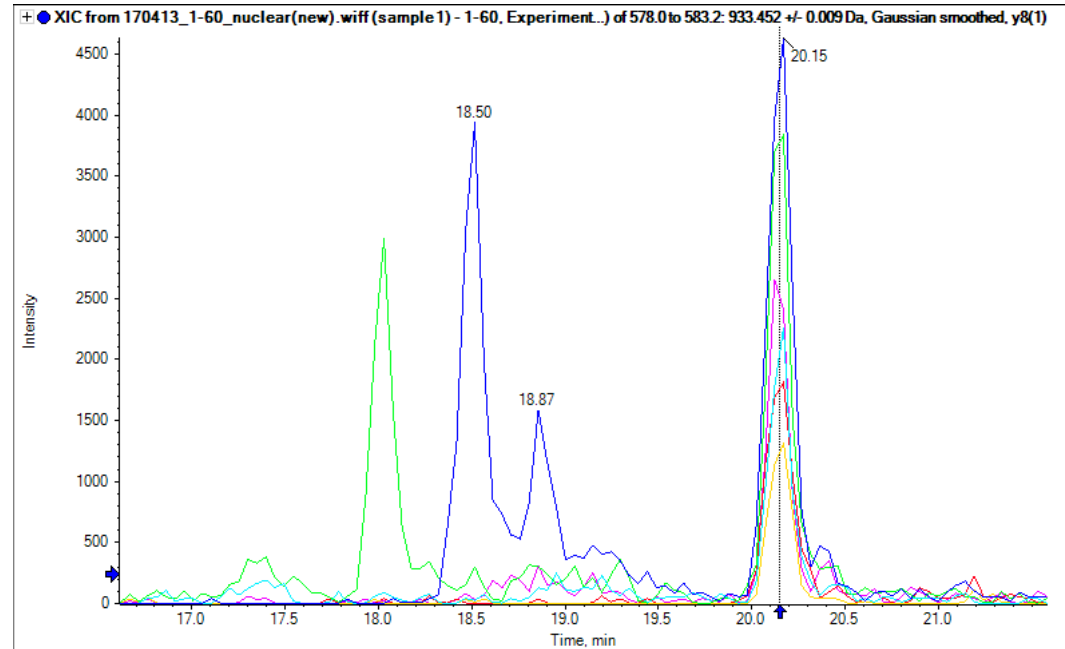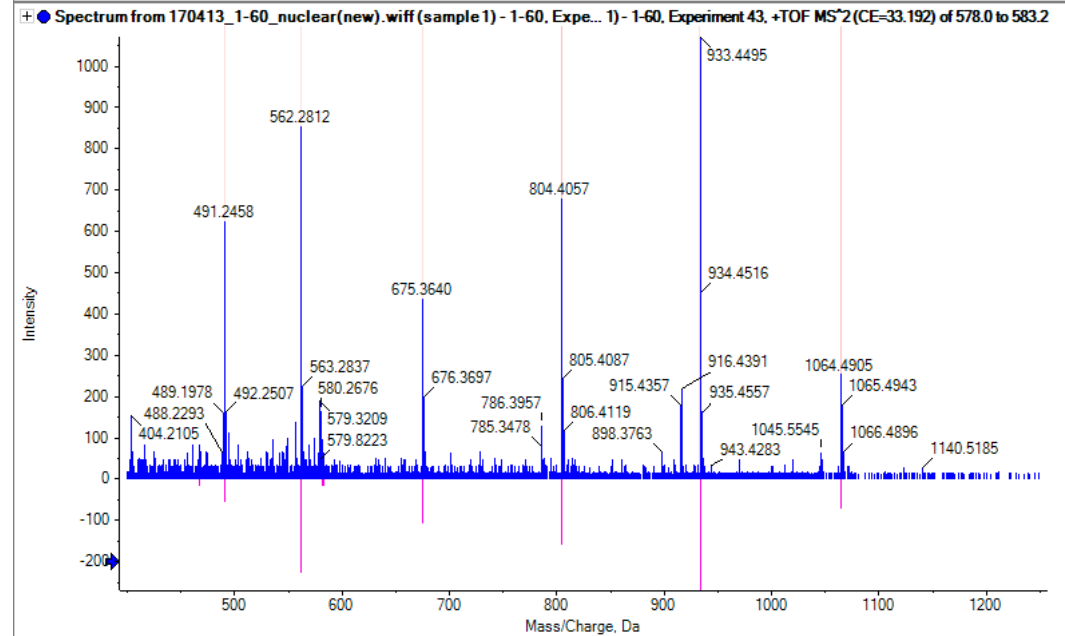

sp|Q9NQ60|EQTN\_HUMAN  
ATTDLNFALK

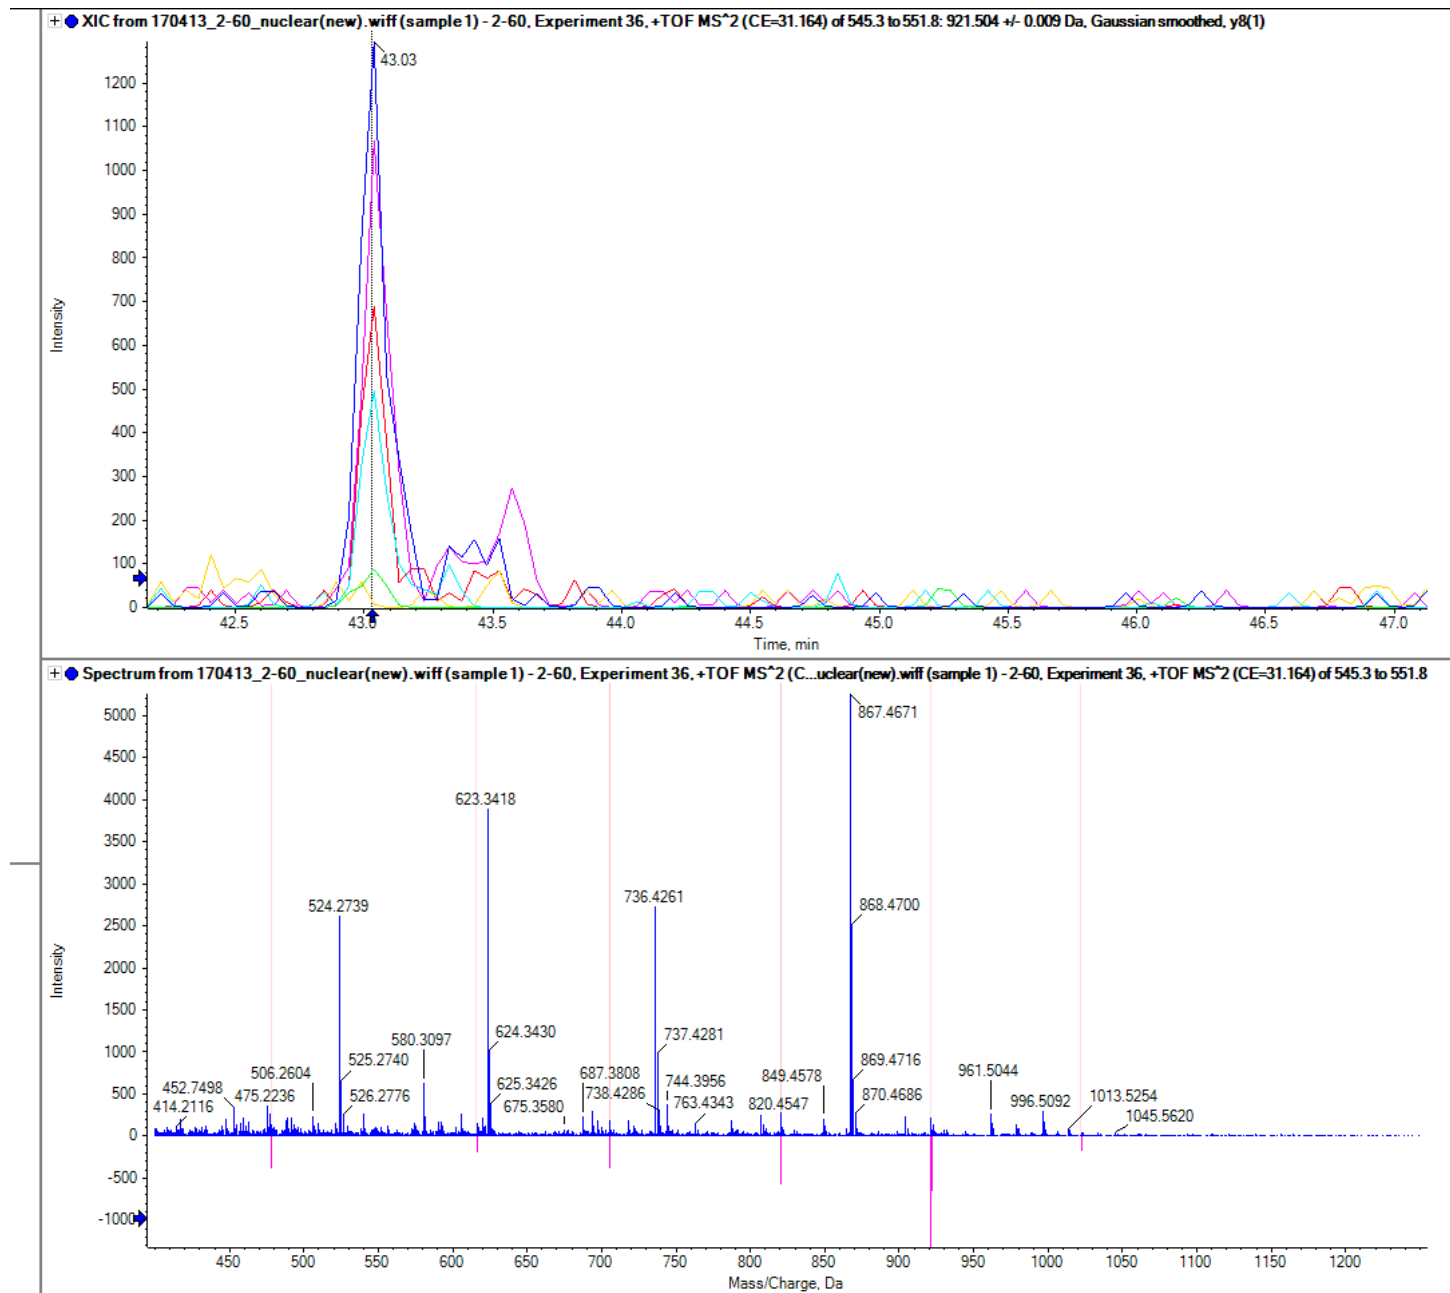

sp|P11940|PABP1\_HUMAN  
ILTATVDNANILLQIDNAR

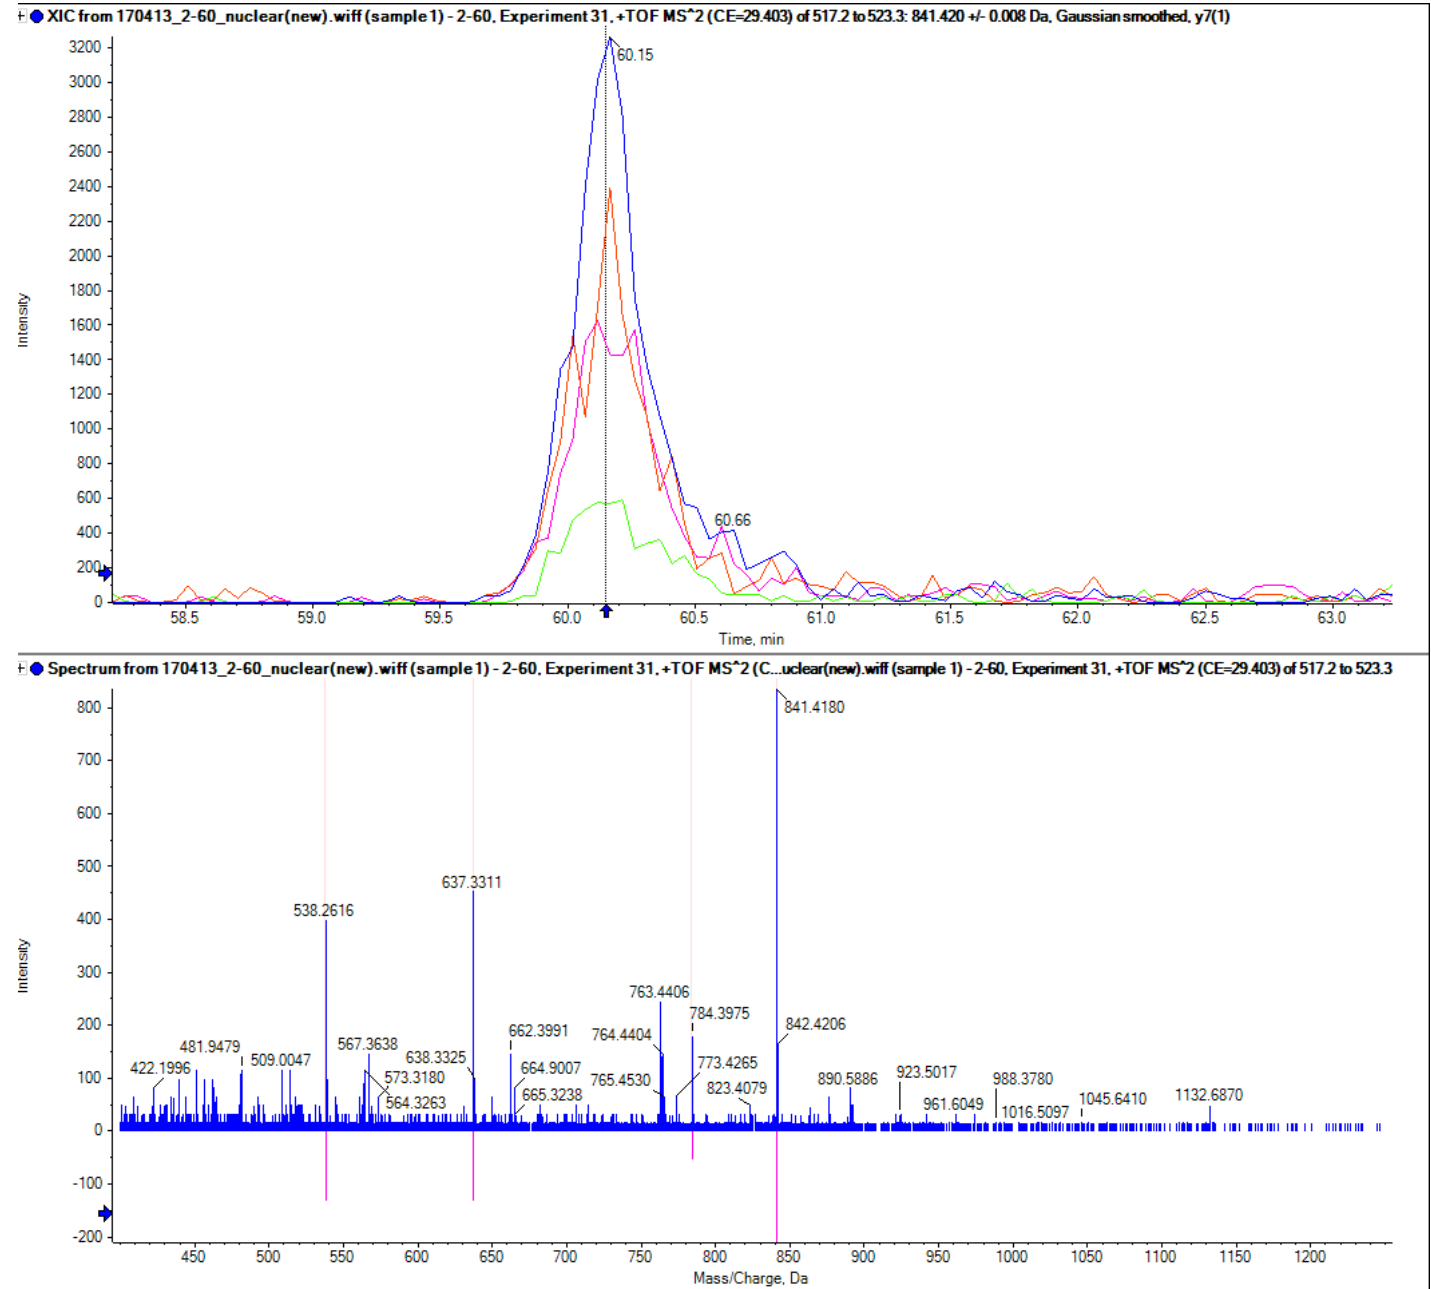

sp|P63261|ACTG\_HUMAN  
QEYDESGPSIVHR

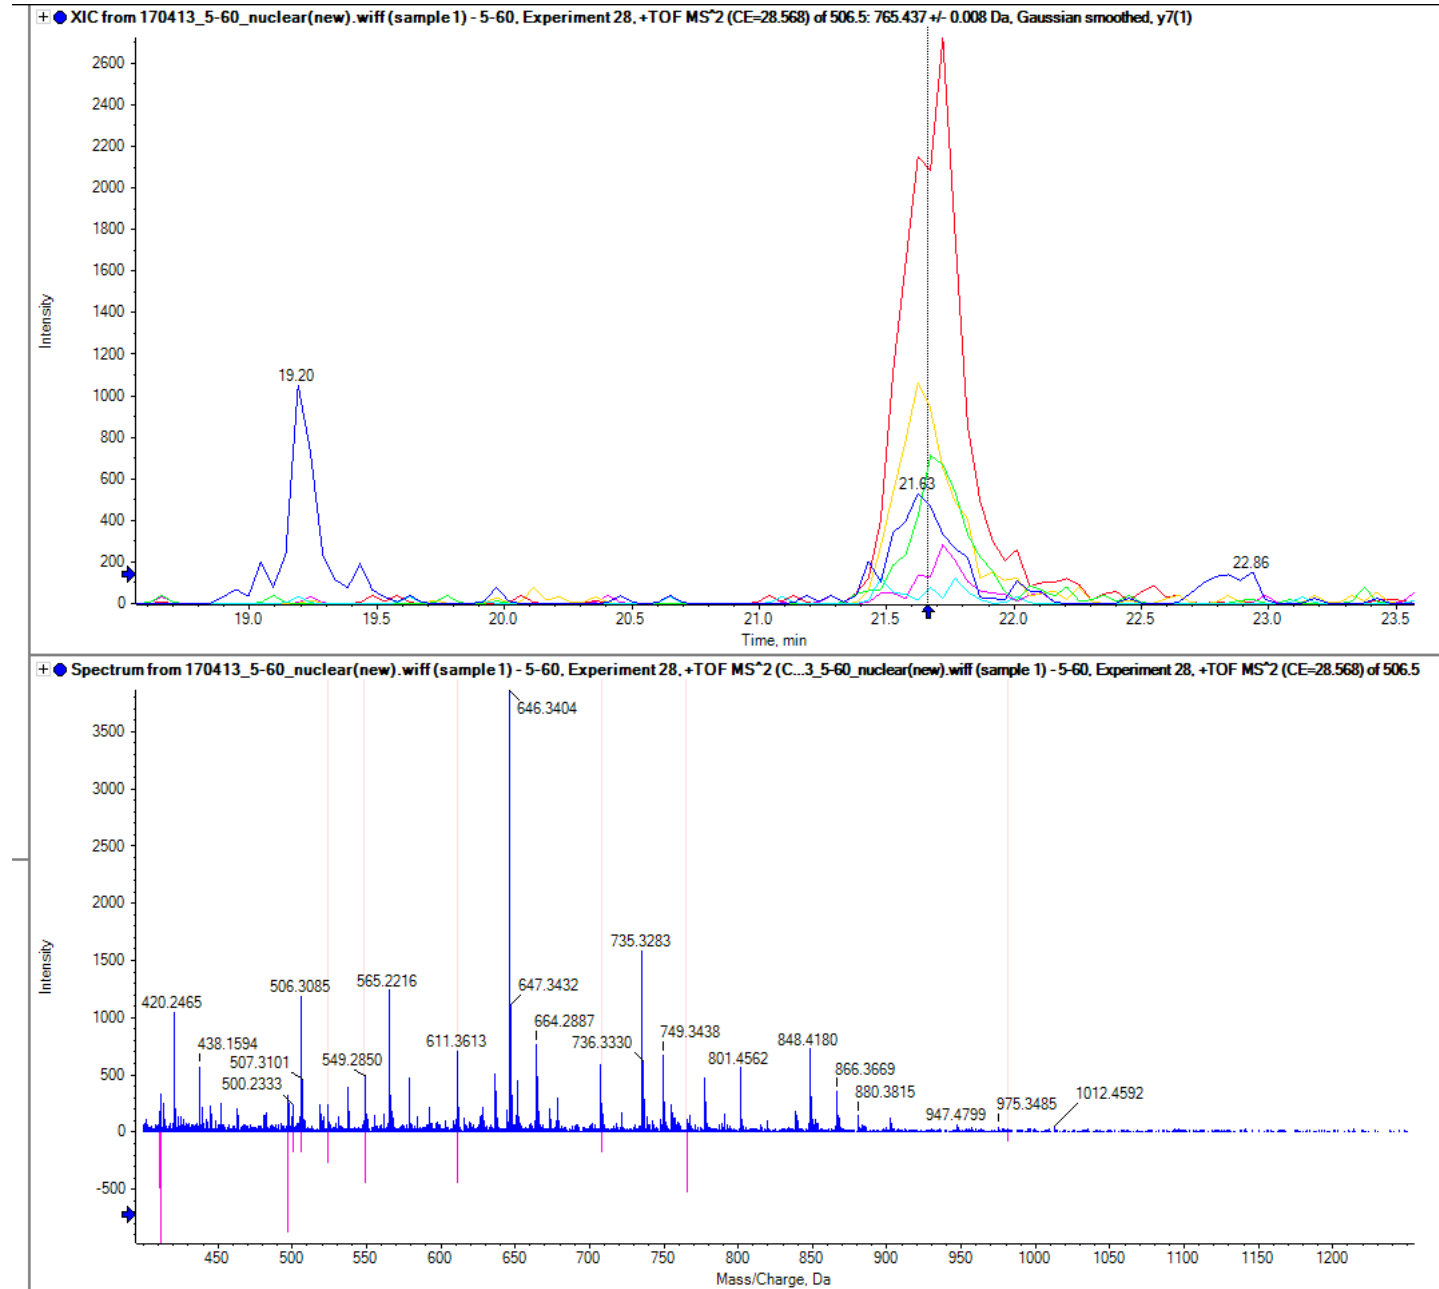

sp|Q5JST6|EFHC2\_HUMAN  
LPLSDDLLESLLSR

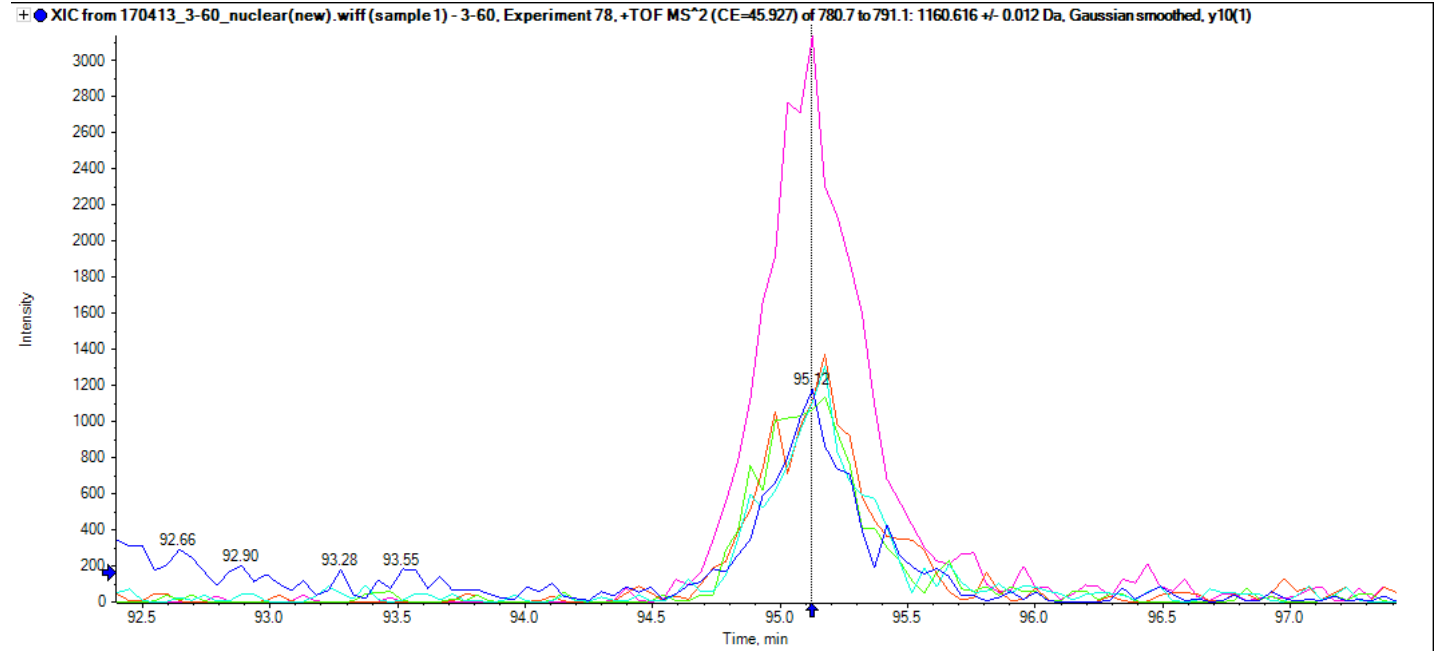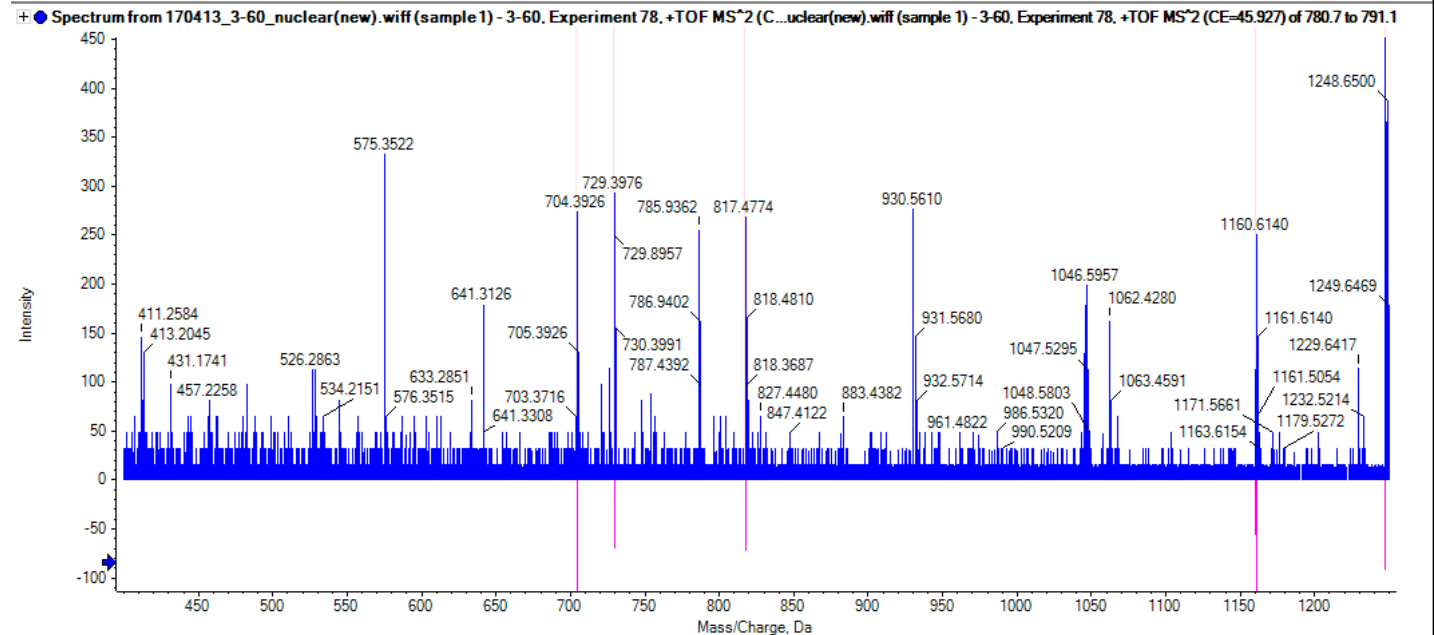

sp|Q9C099|LRCC1\_HUMAN  
EDIHSLALLTDR

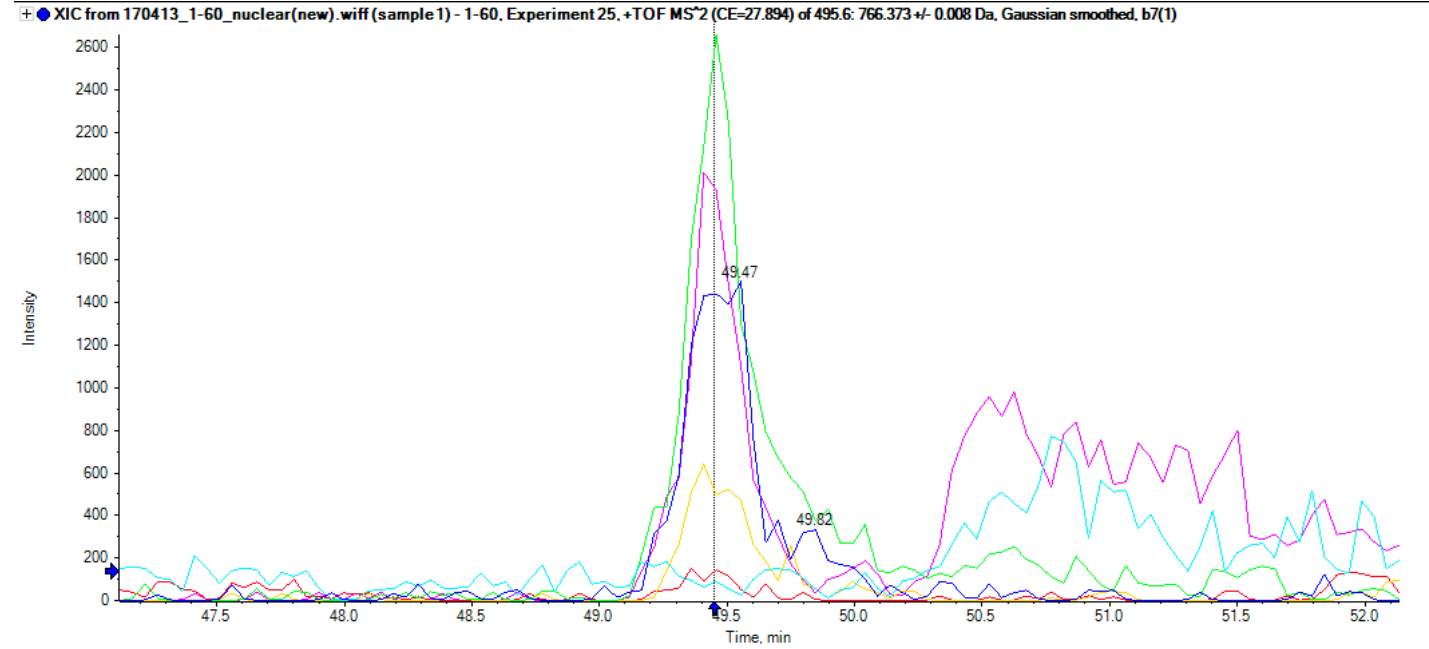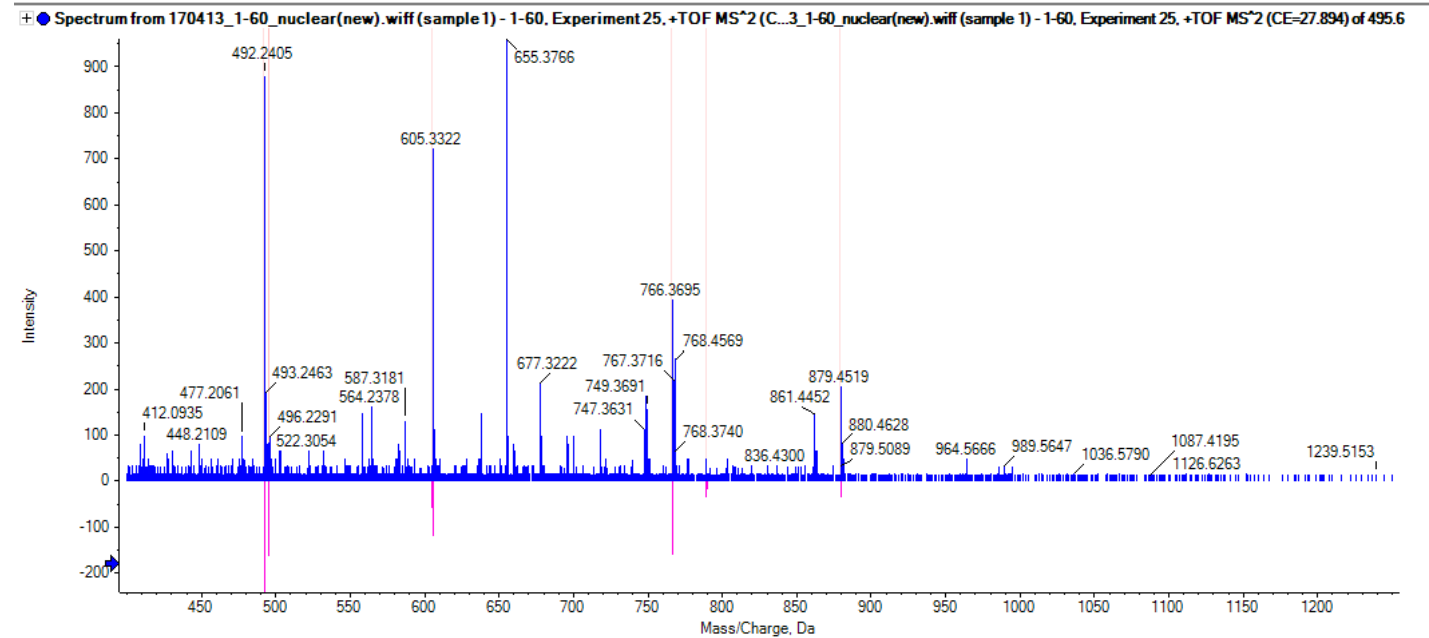

sp|P02794|FRIH\_HUMAN  
[PGQ]-QNYHQDSEAAINR

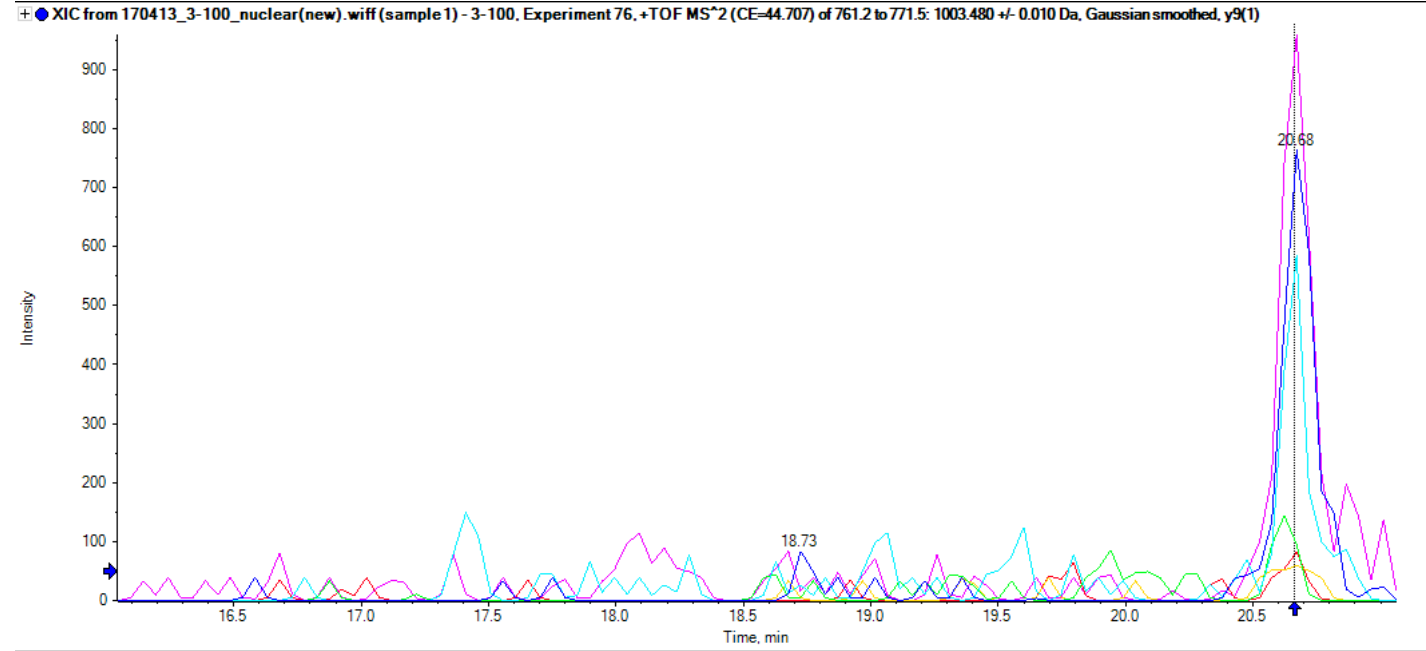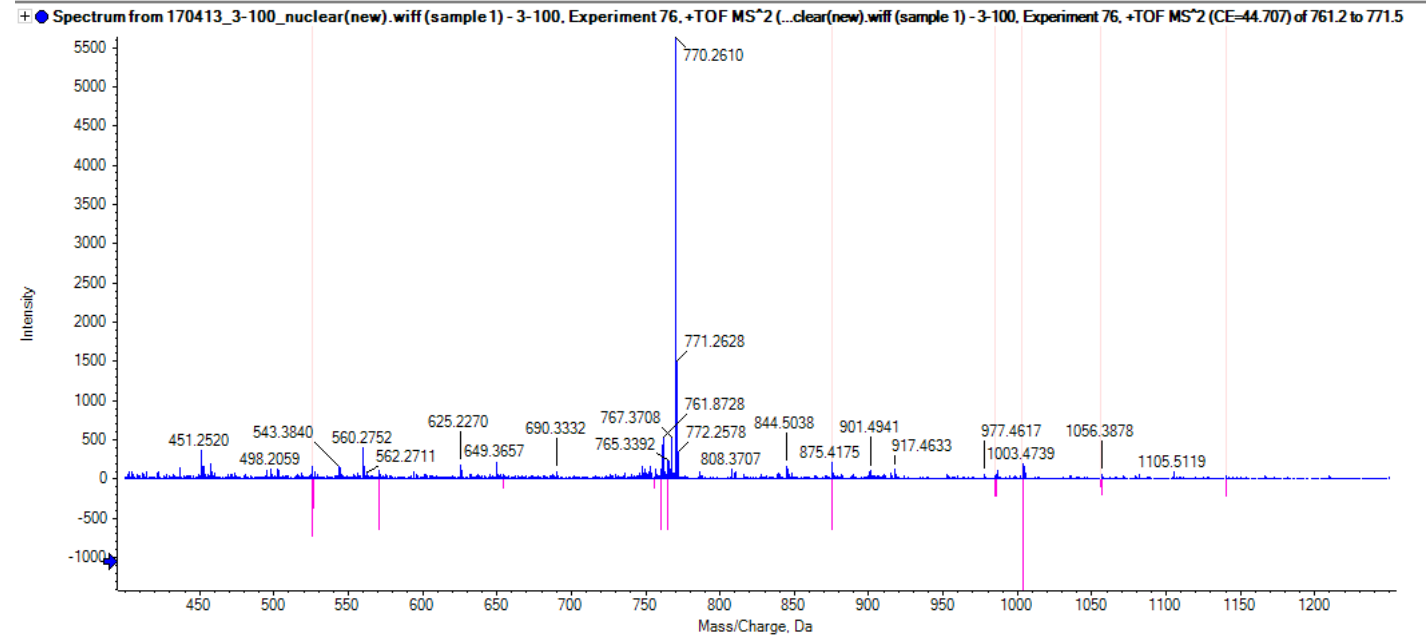

sp|Q92621|NU205\_HUMAN  
[1Ac]-ATPLAVNSAASLWGPYK

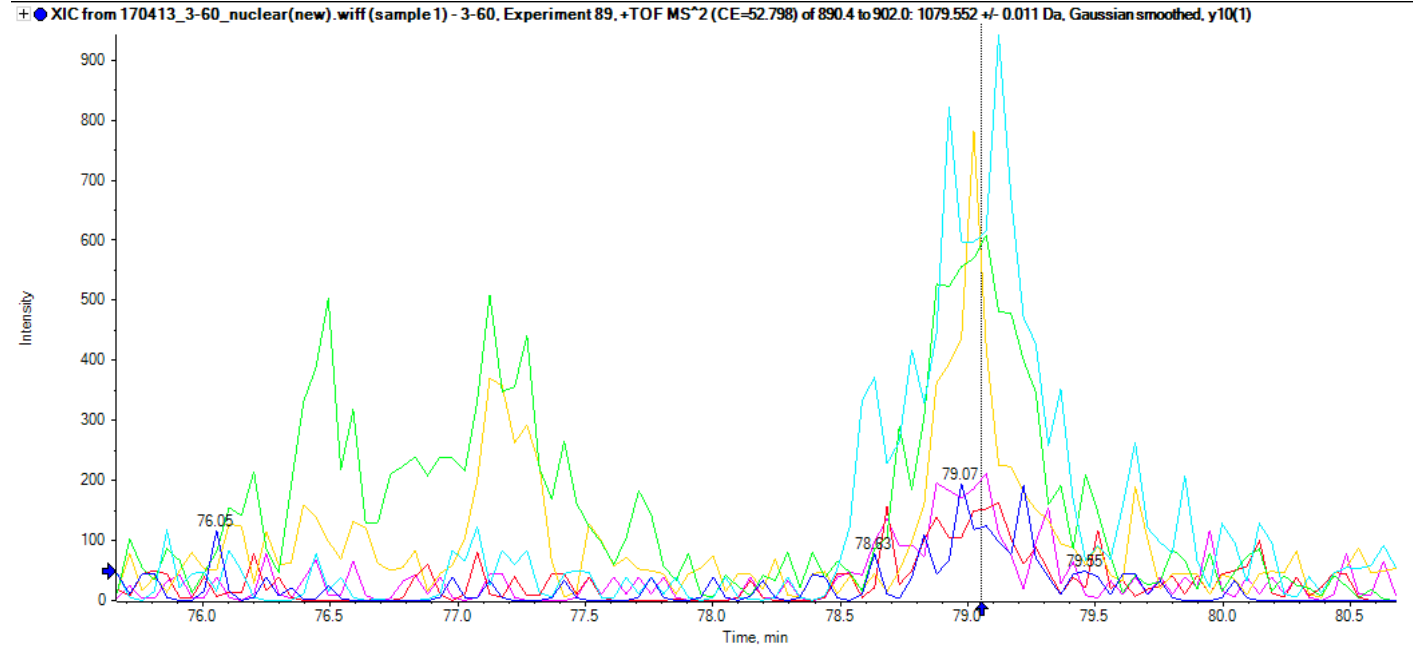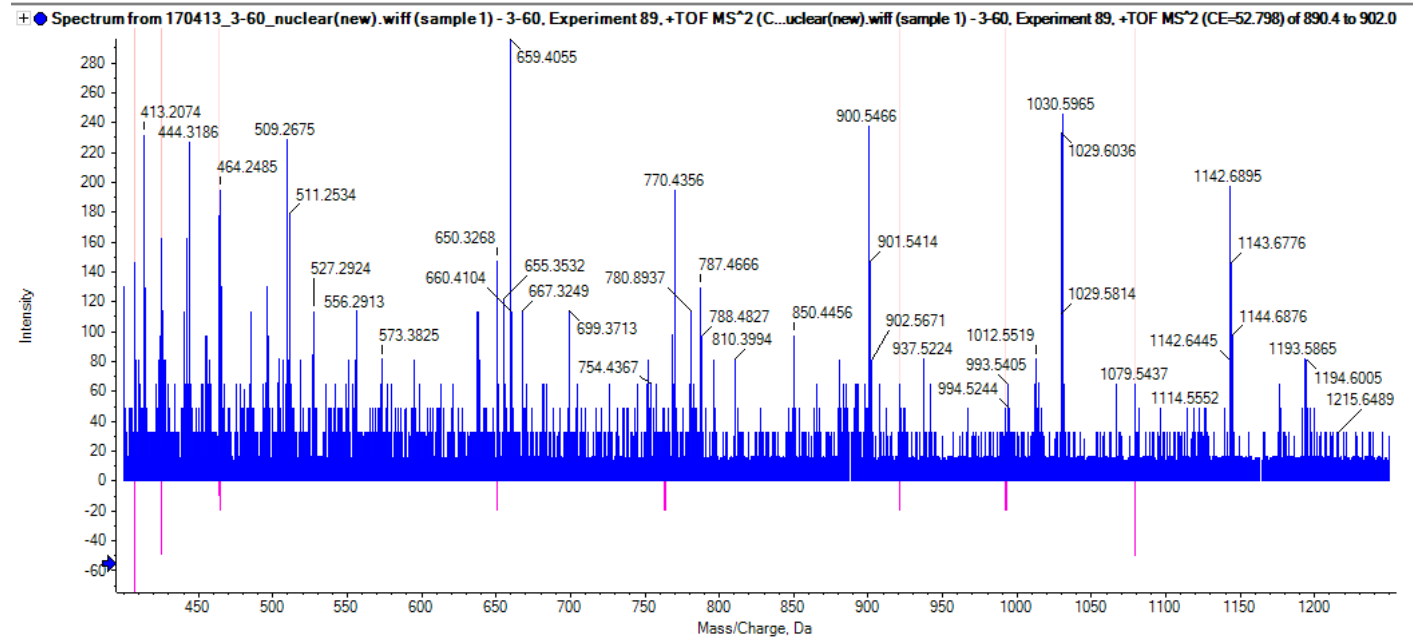



sp|P10253|LYAG\_HUMAN  
AHFPLDVQWN[Dea]DLDYMSR

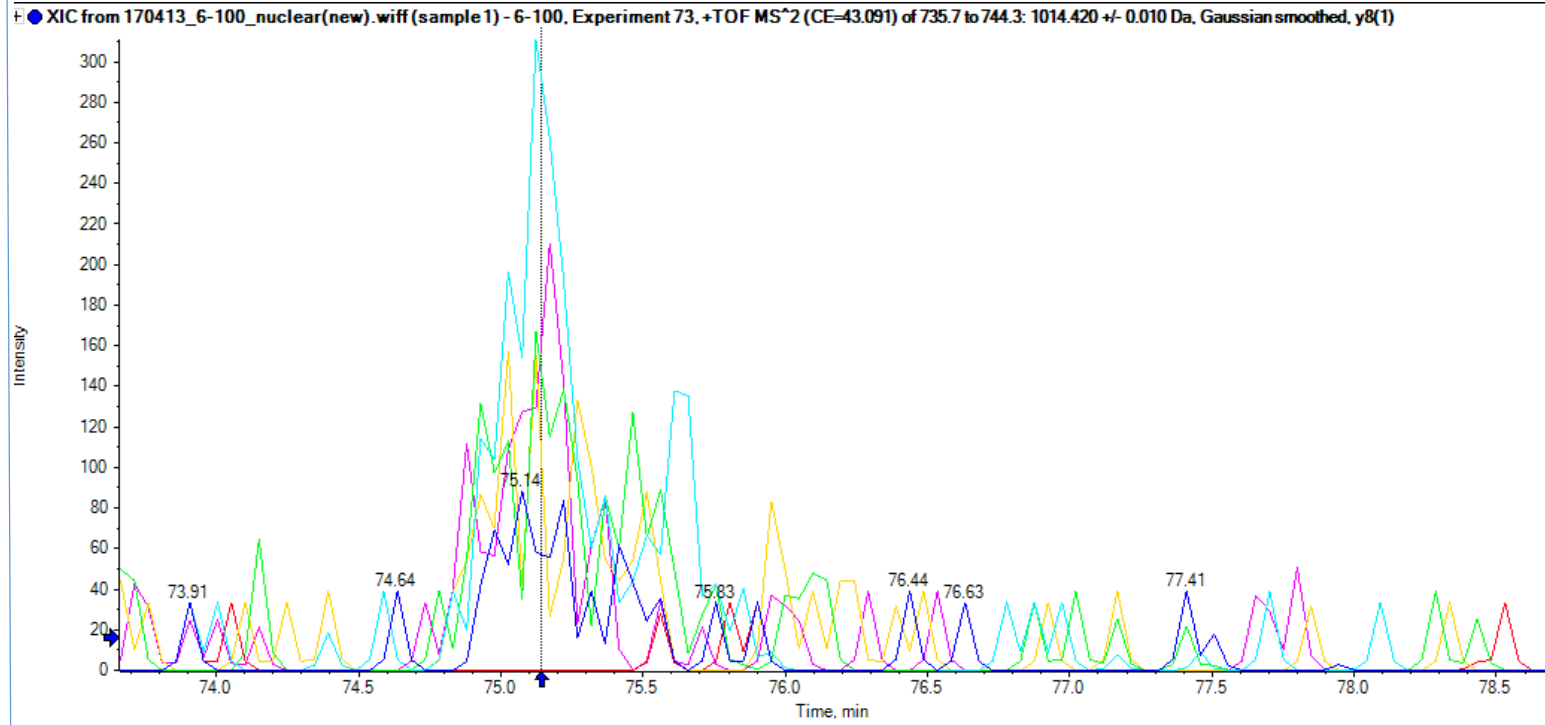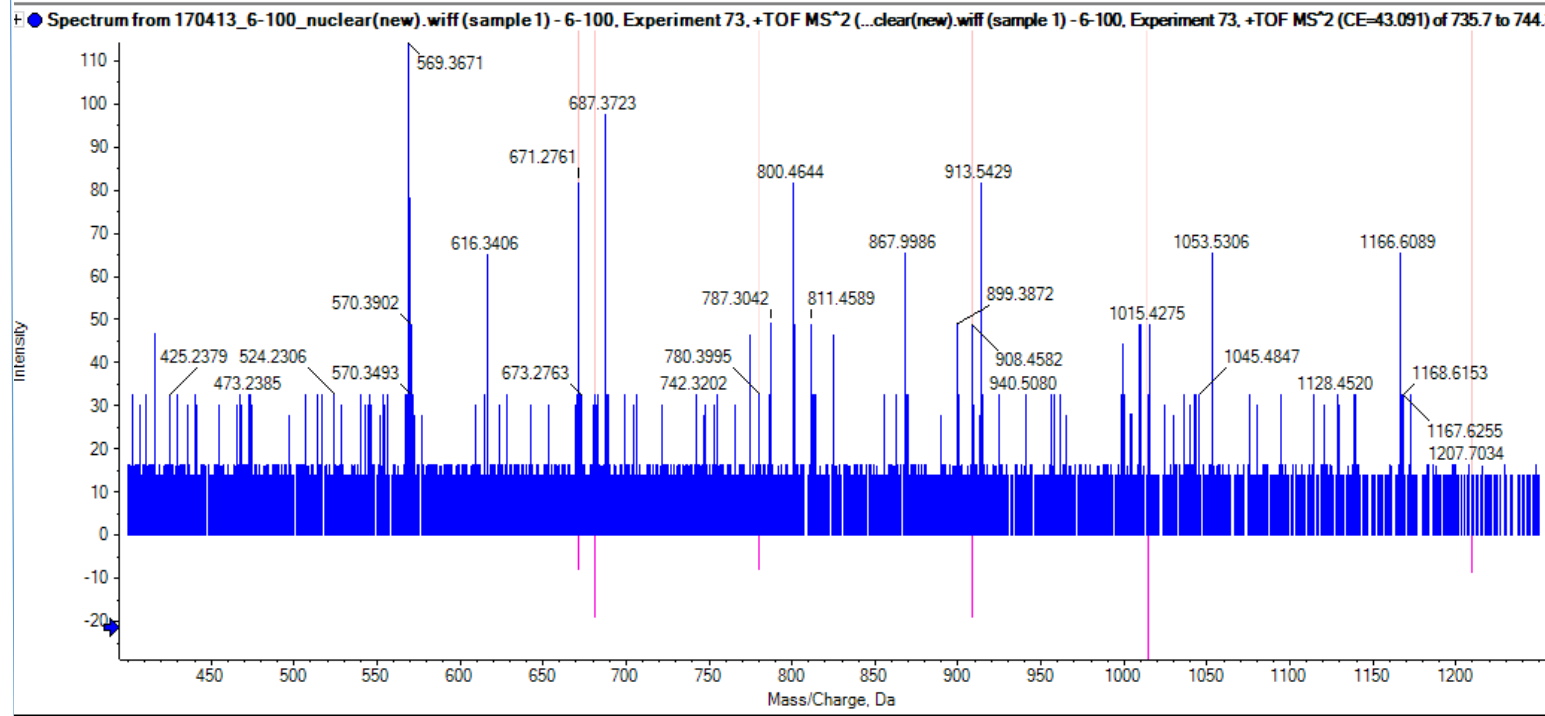

# Translation machinery-associated protein 16

QQFEGYGLEIPDILNASNLK

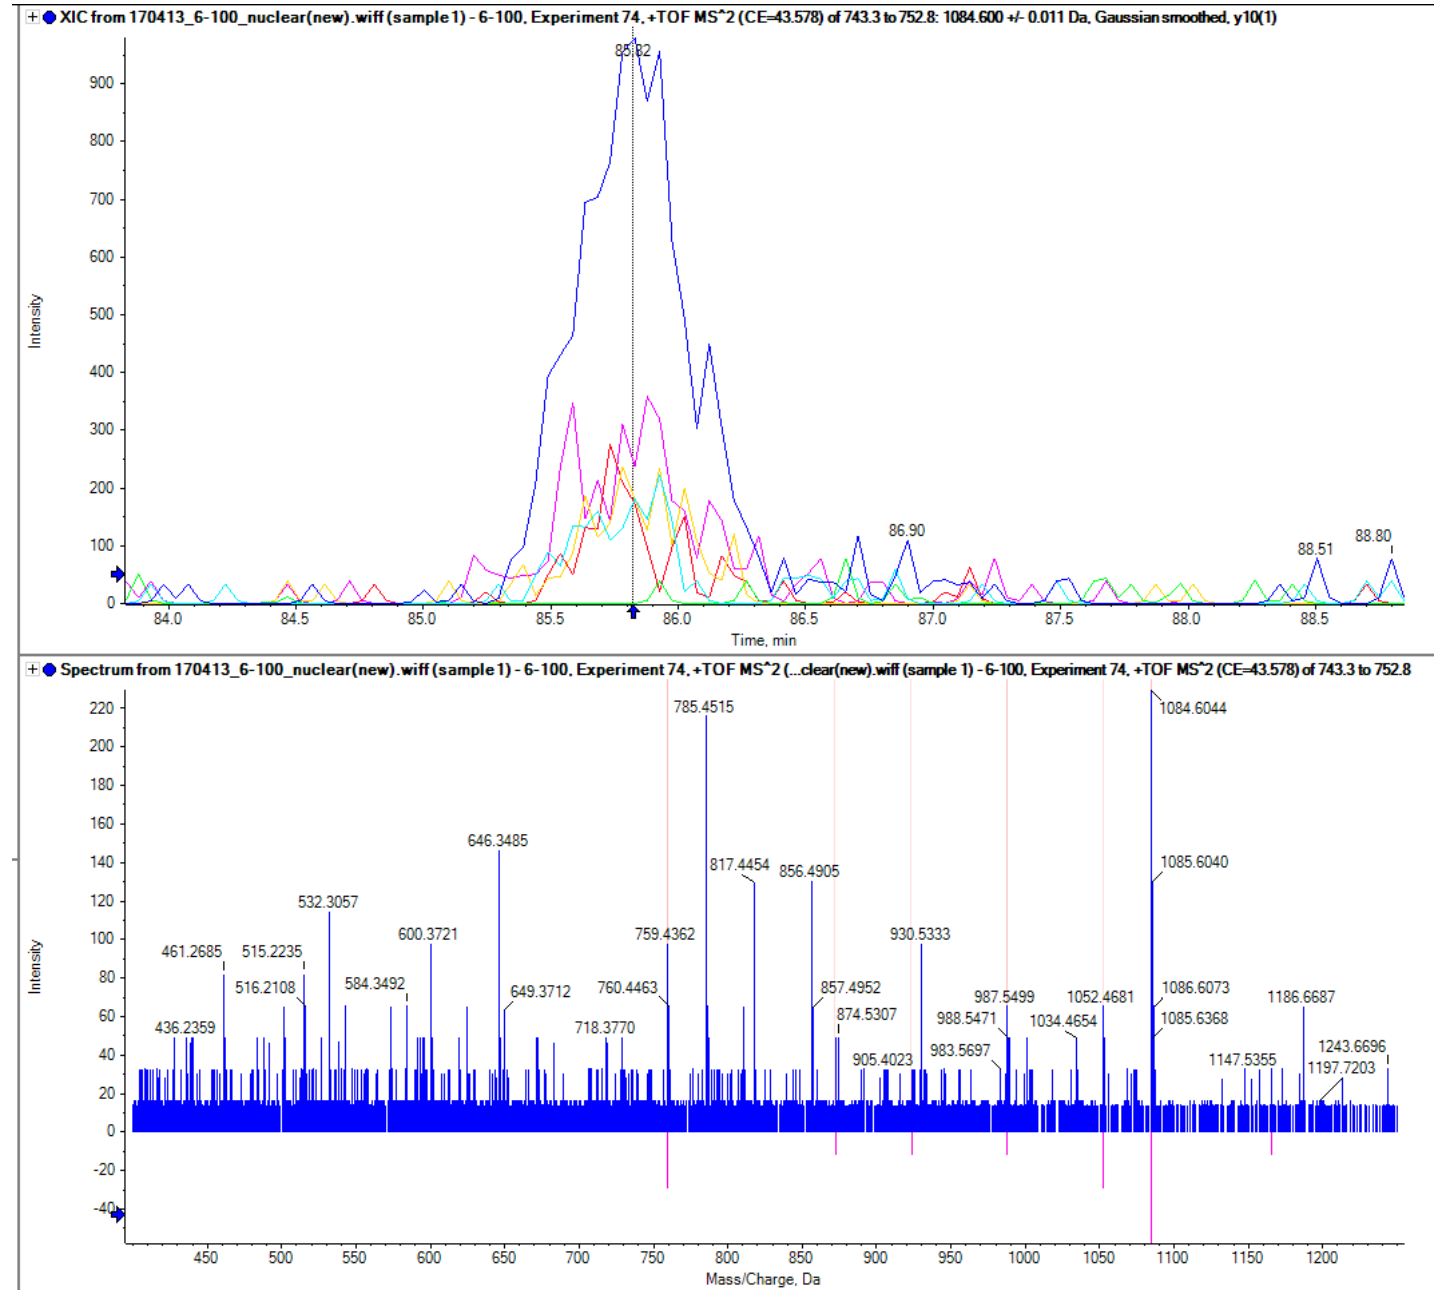

Testis-specific gene 10

VSALADLSSTR

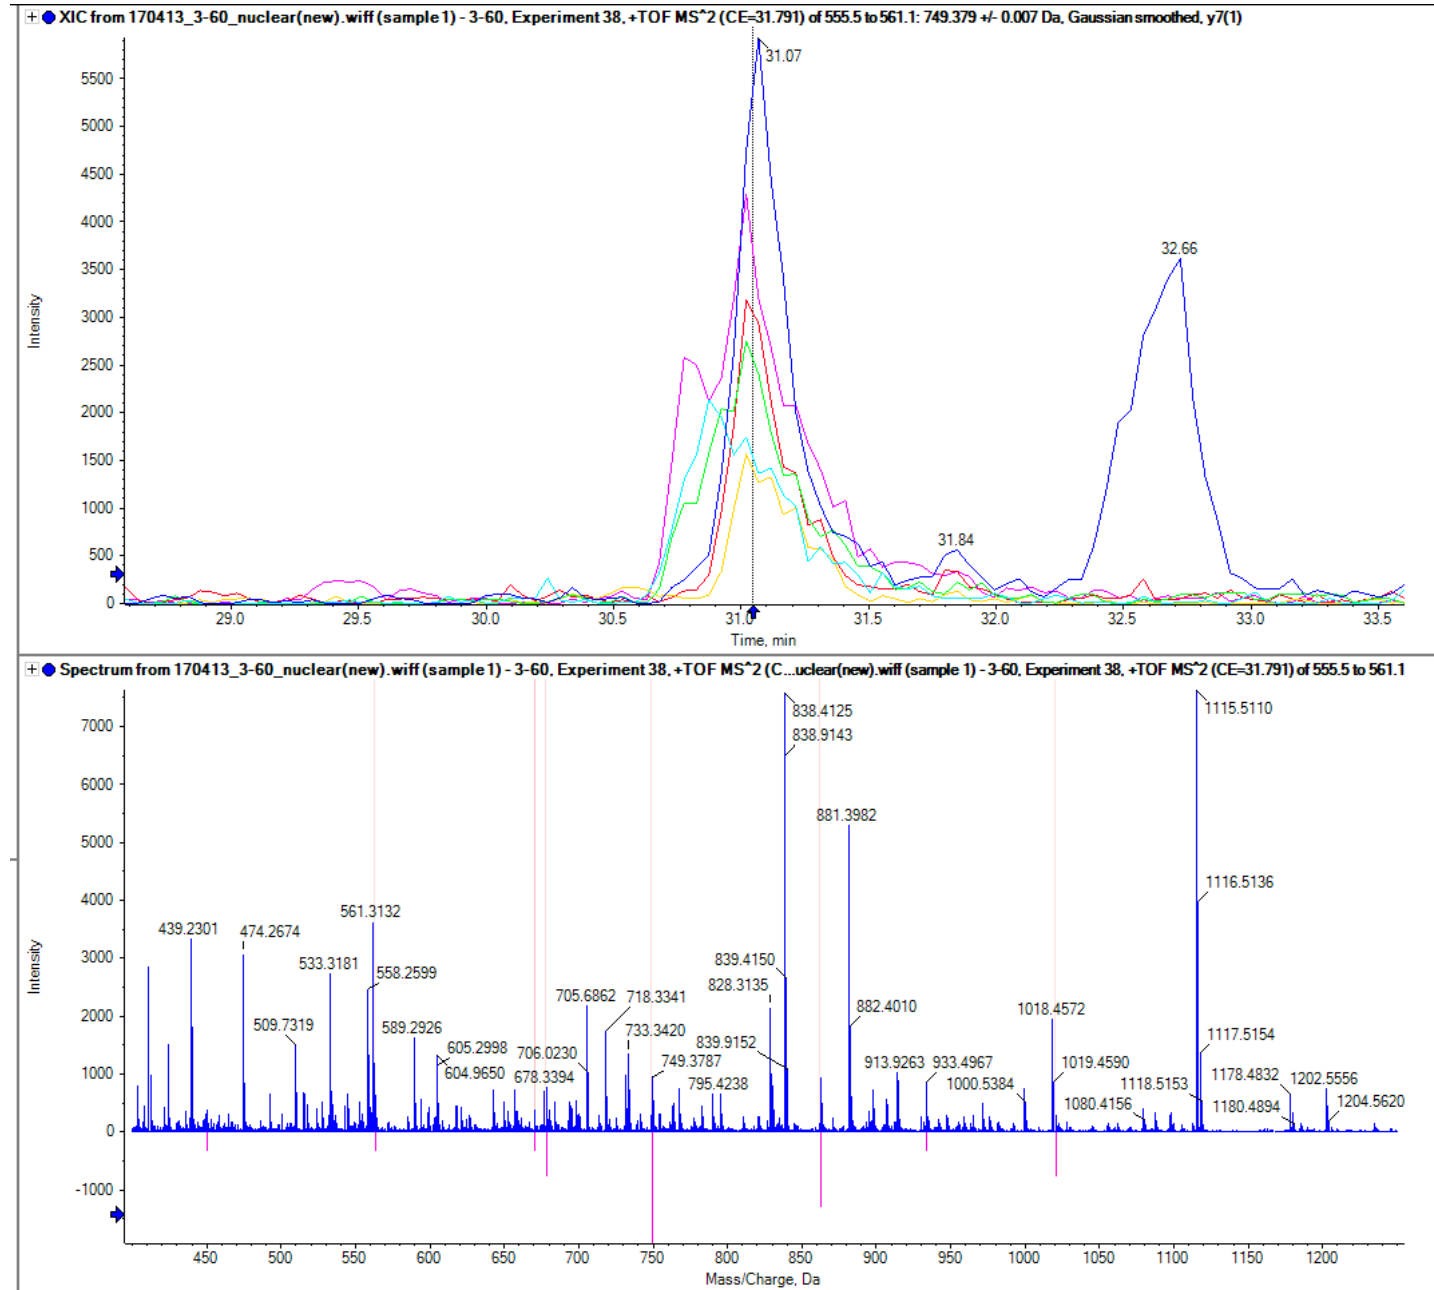

# PHD finger protein 7

MGIHIPDRDAAWELEPGAFSDLYQR

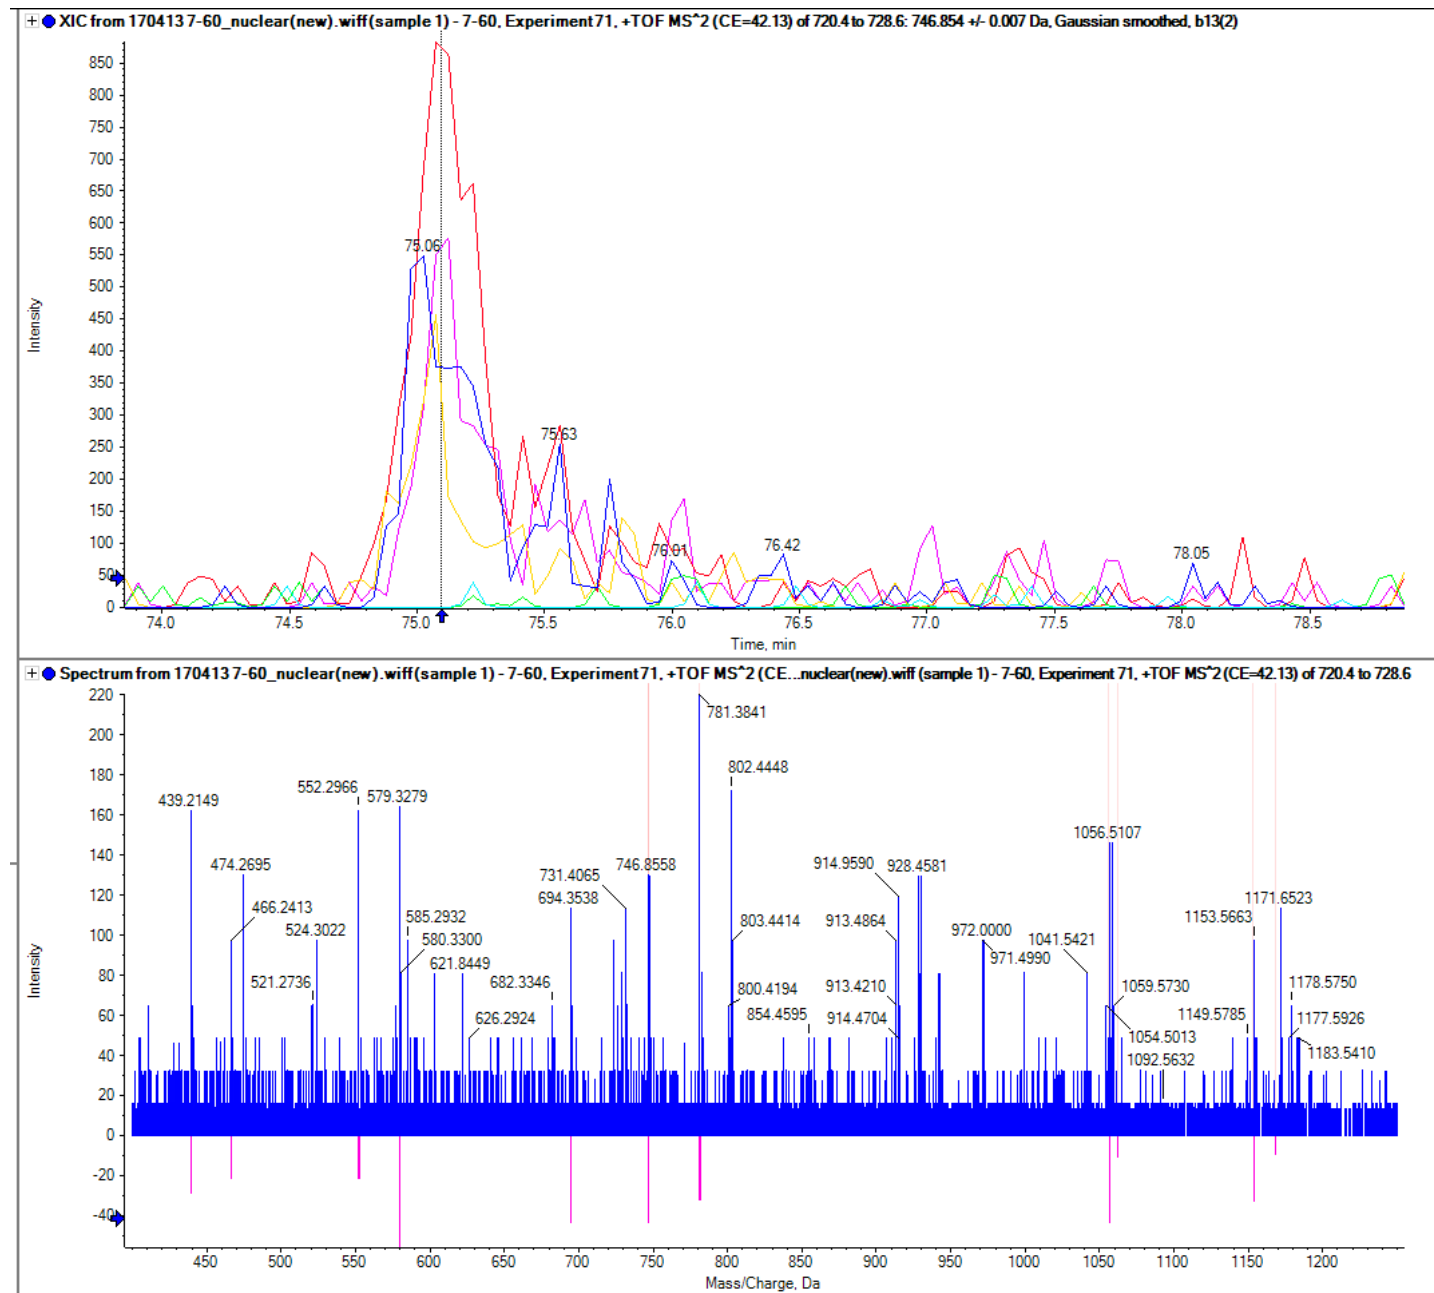

# Plasma membrane calcium-transporting ATPase

VLPANSMAESR

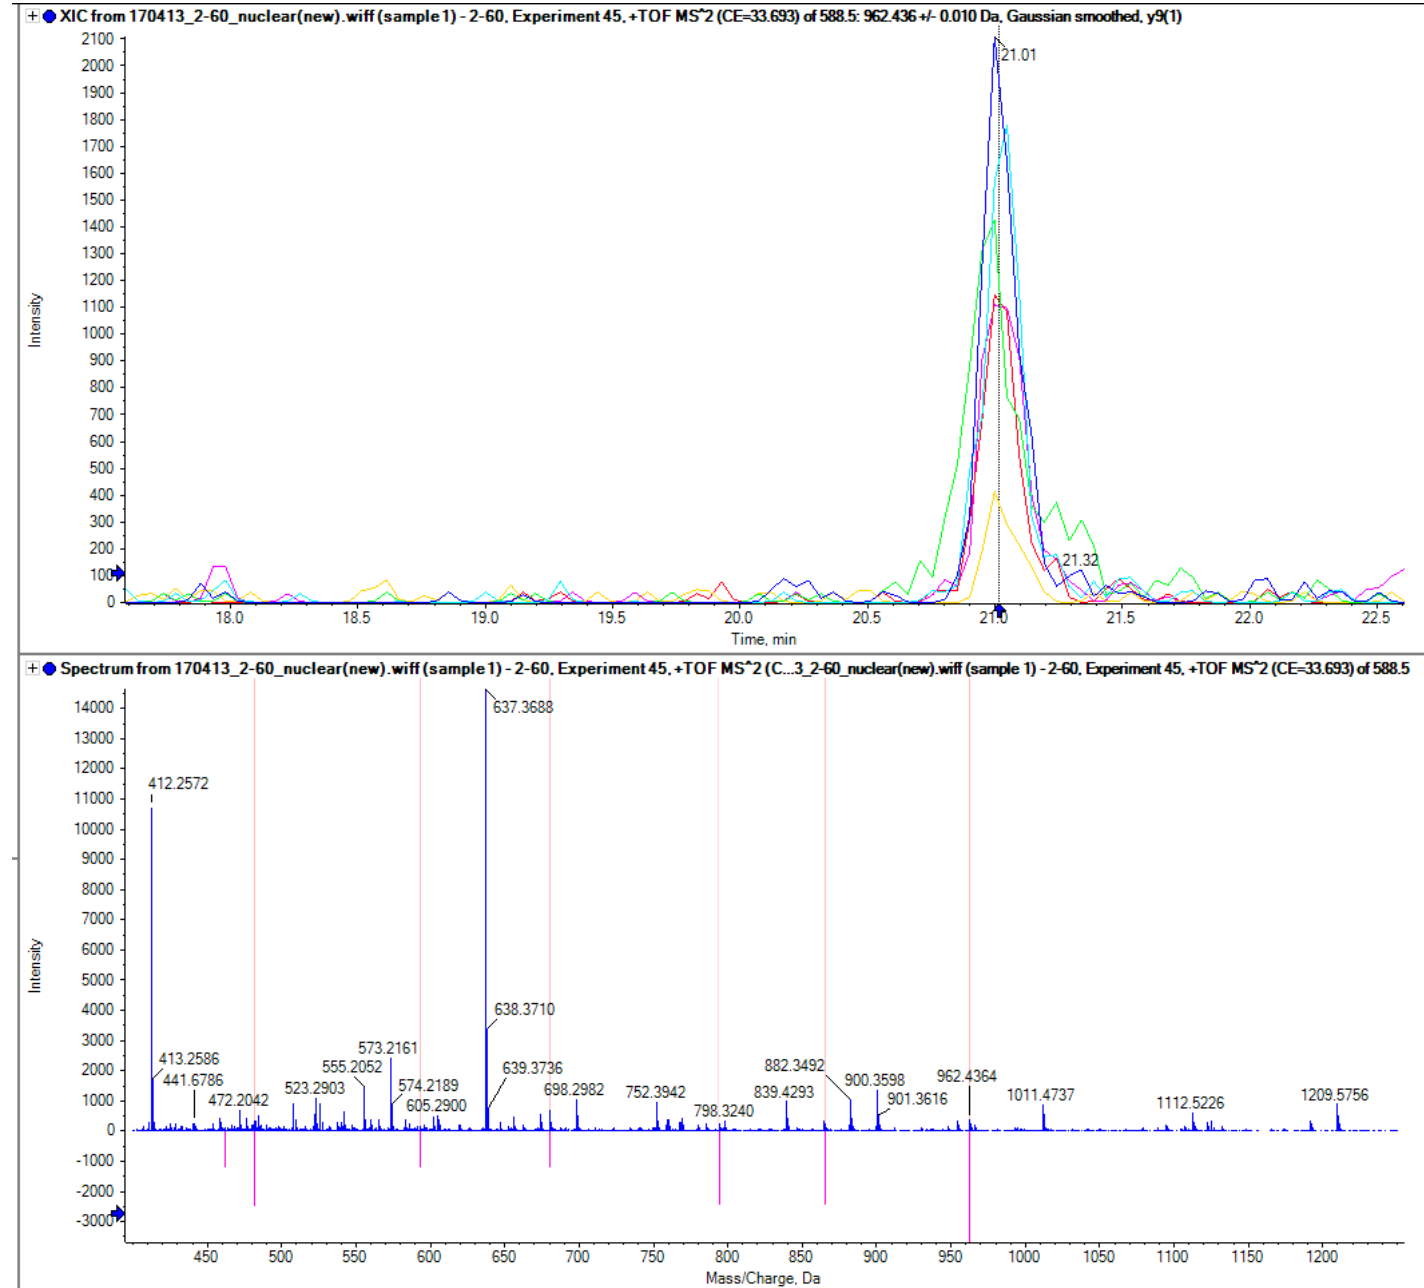

# Histidine ammonia-lyase

## SREVIDSIK[1Ac]EK

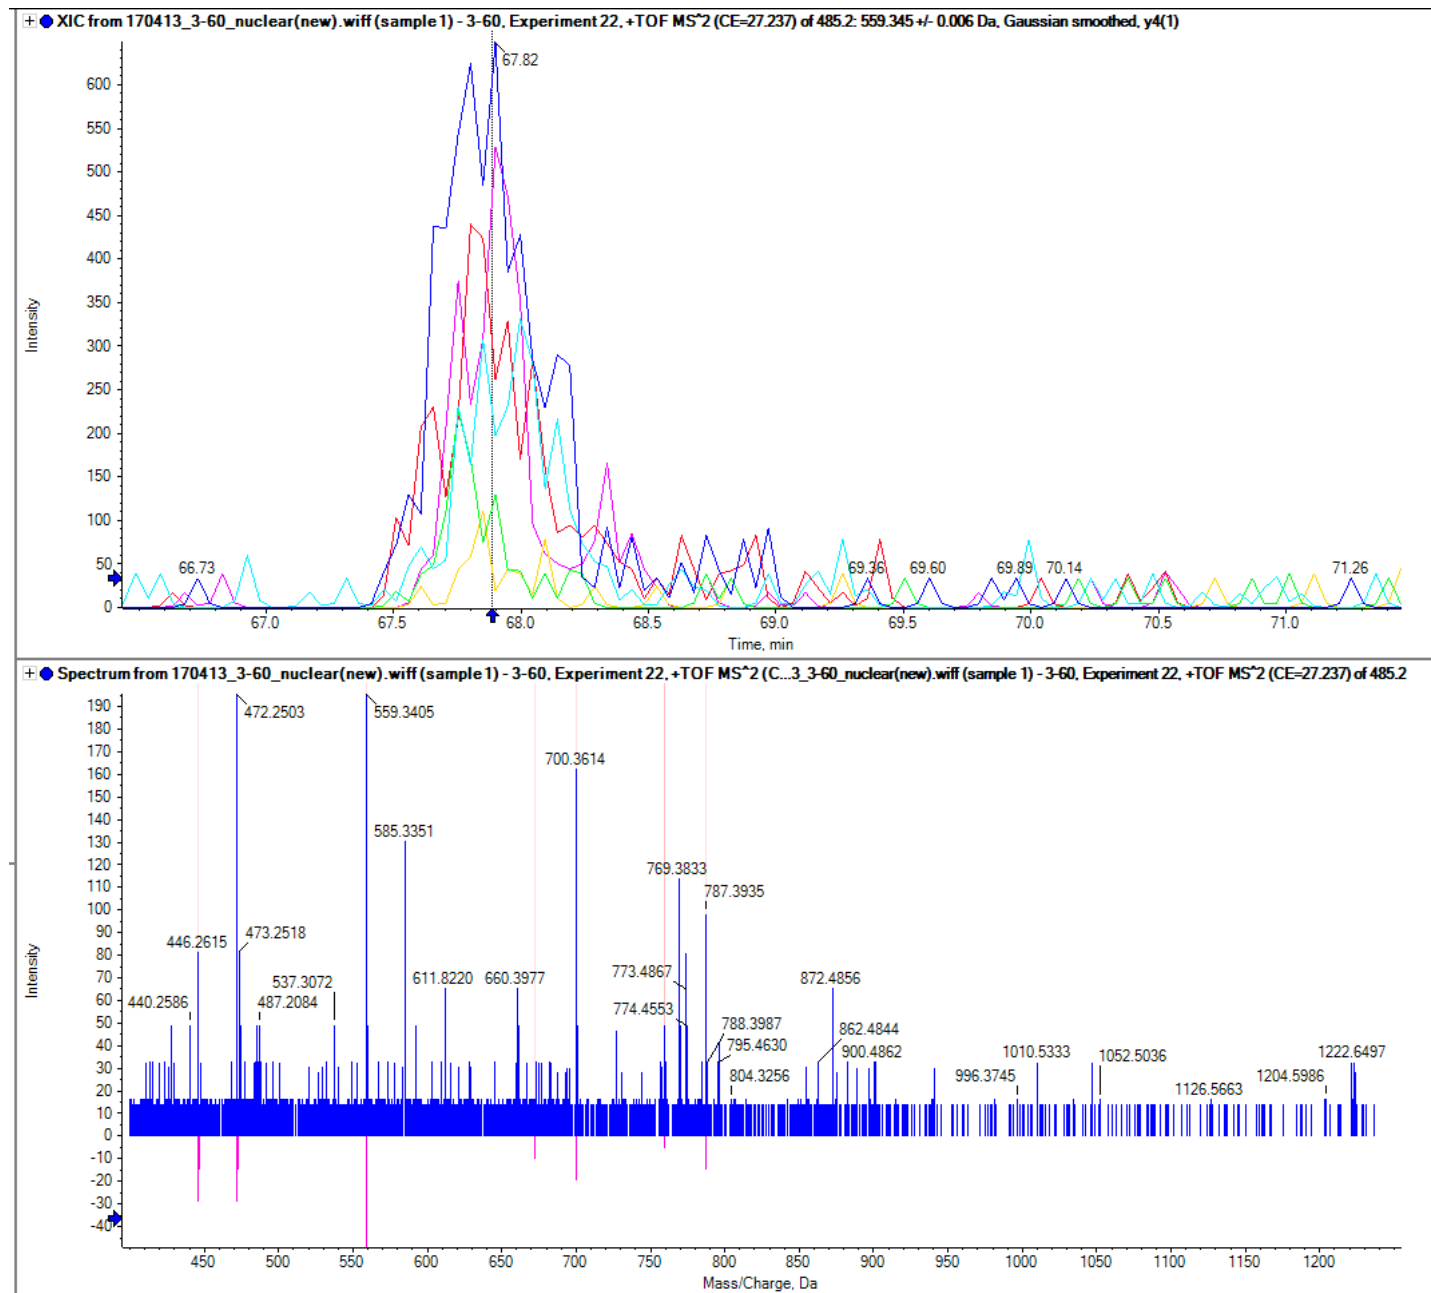

U6 snRNA-associated Sm-like protein  
YVQLPADEVDTQLLQDAAR

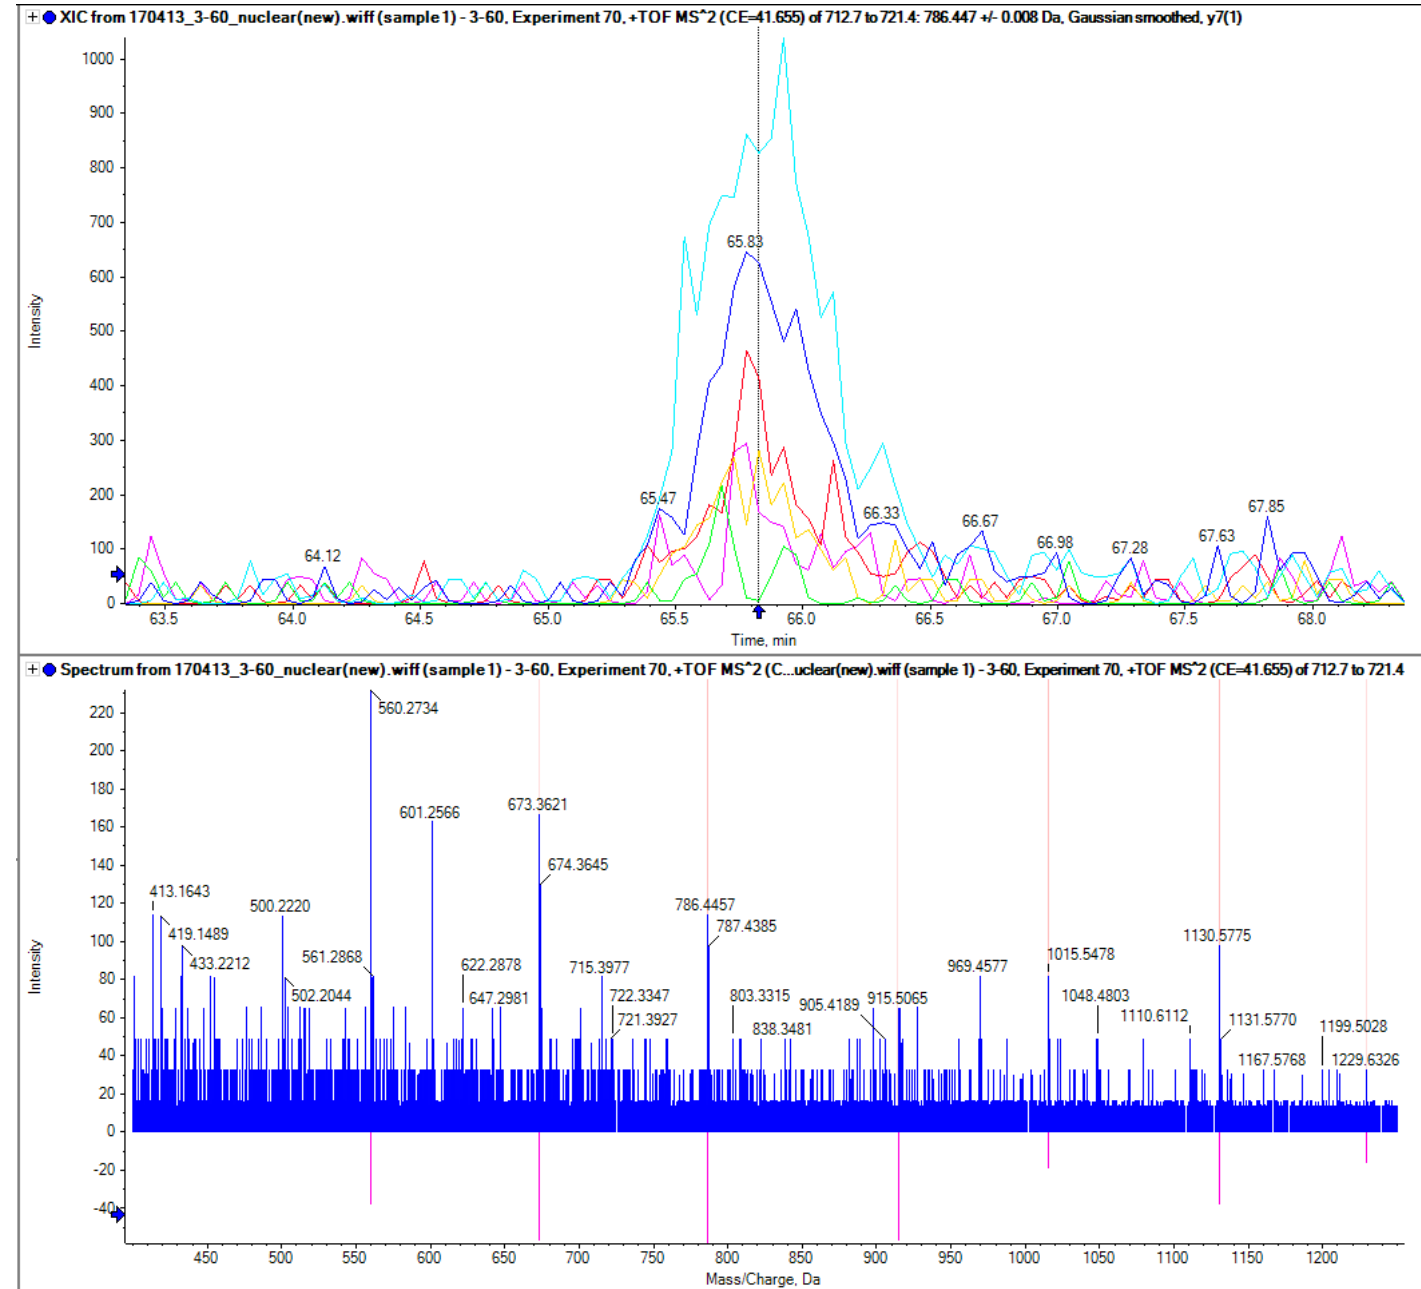

Tektin-5 OS=Homo sapiens GN=TEKT5 PE=1 SV=1

IDGTISVPETWAK

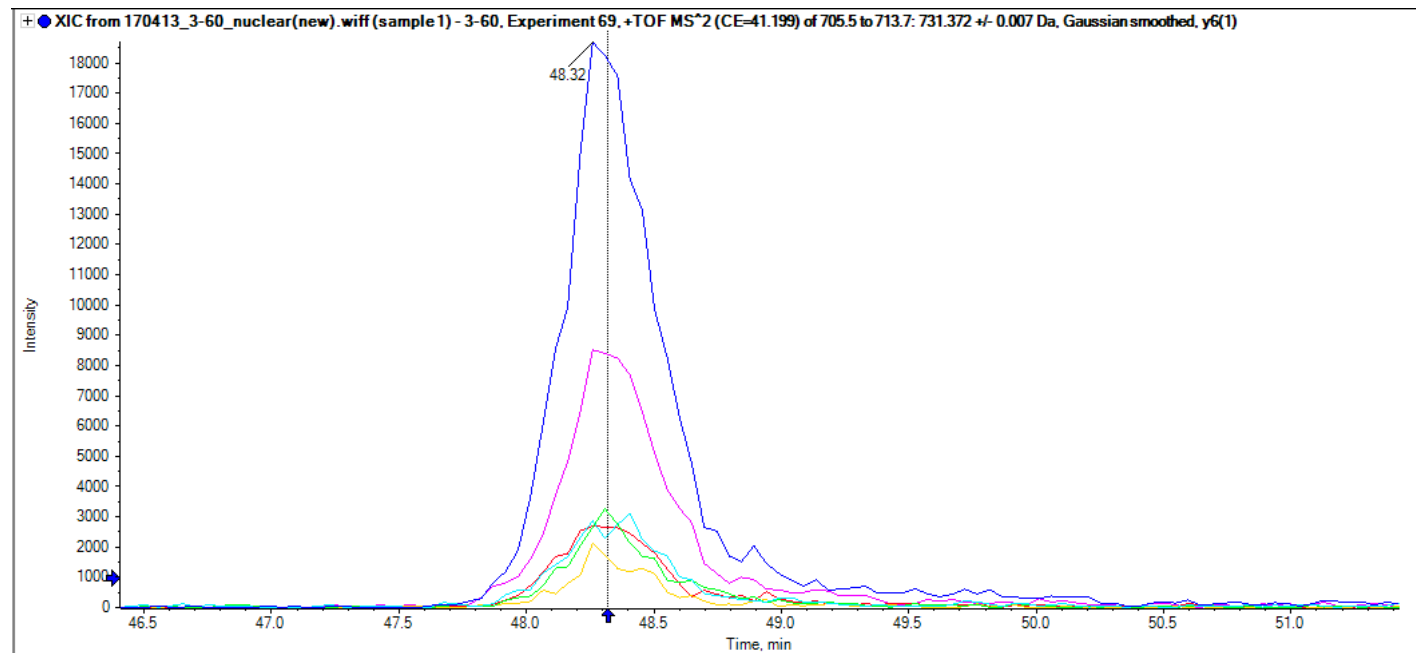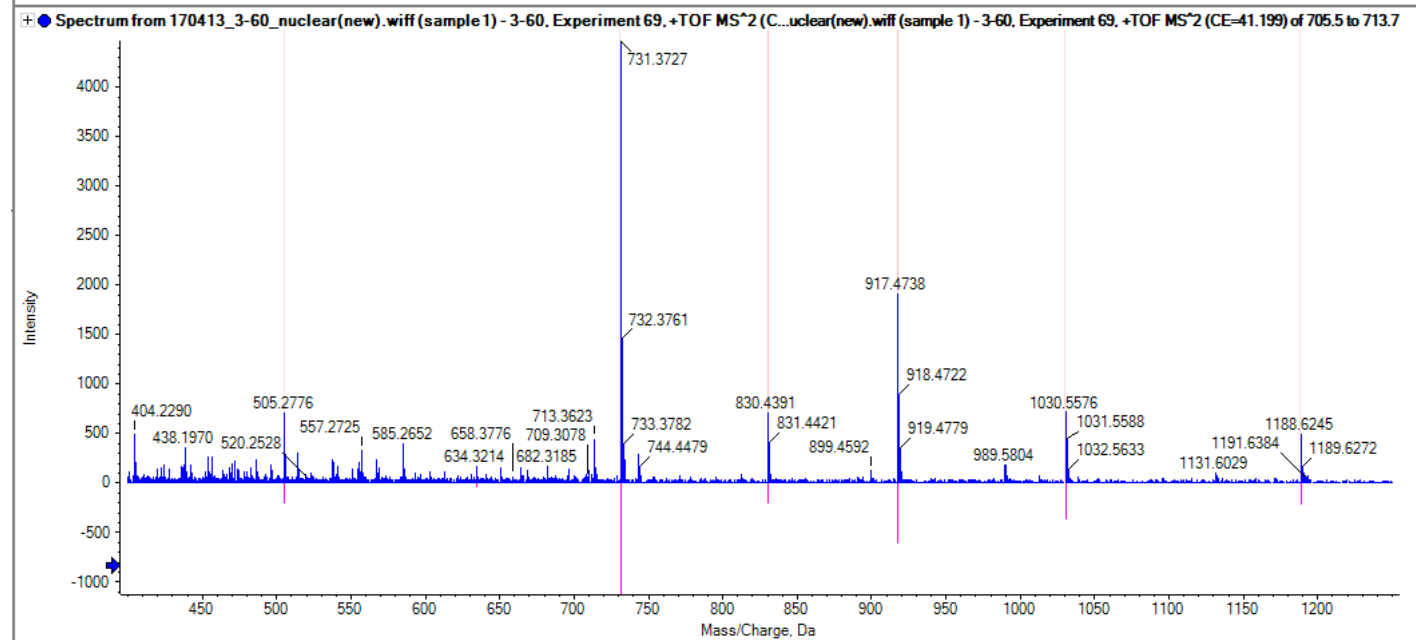



# Vesicular integral-membrane protein

NLHGDGIALWYTR

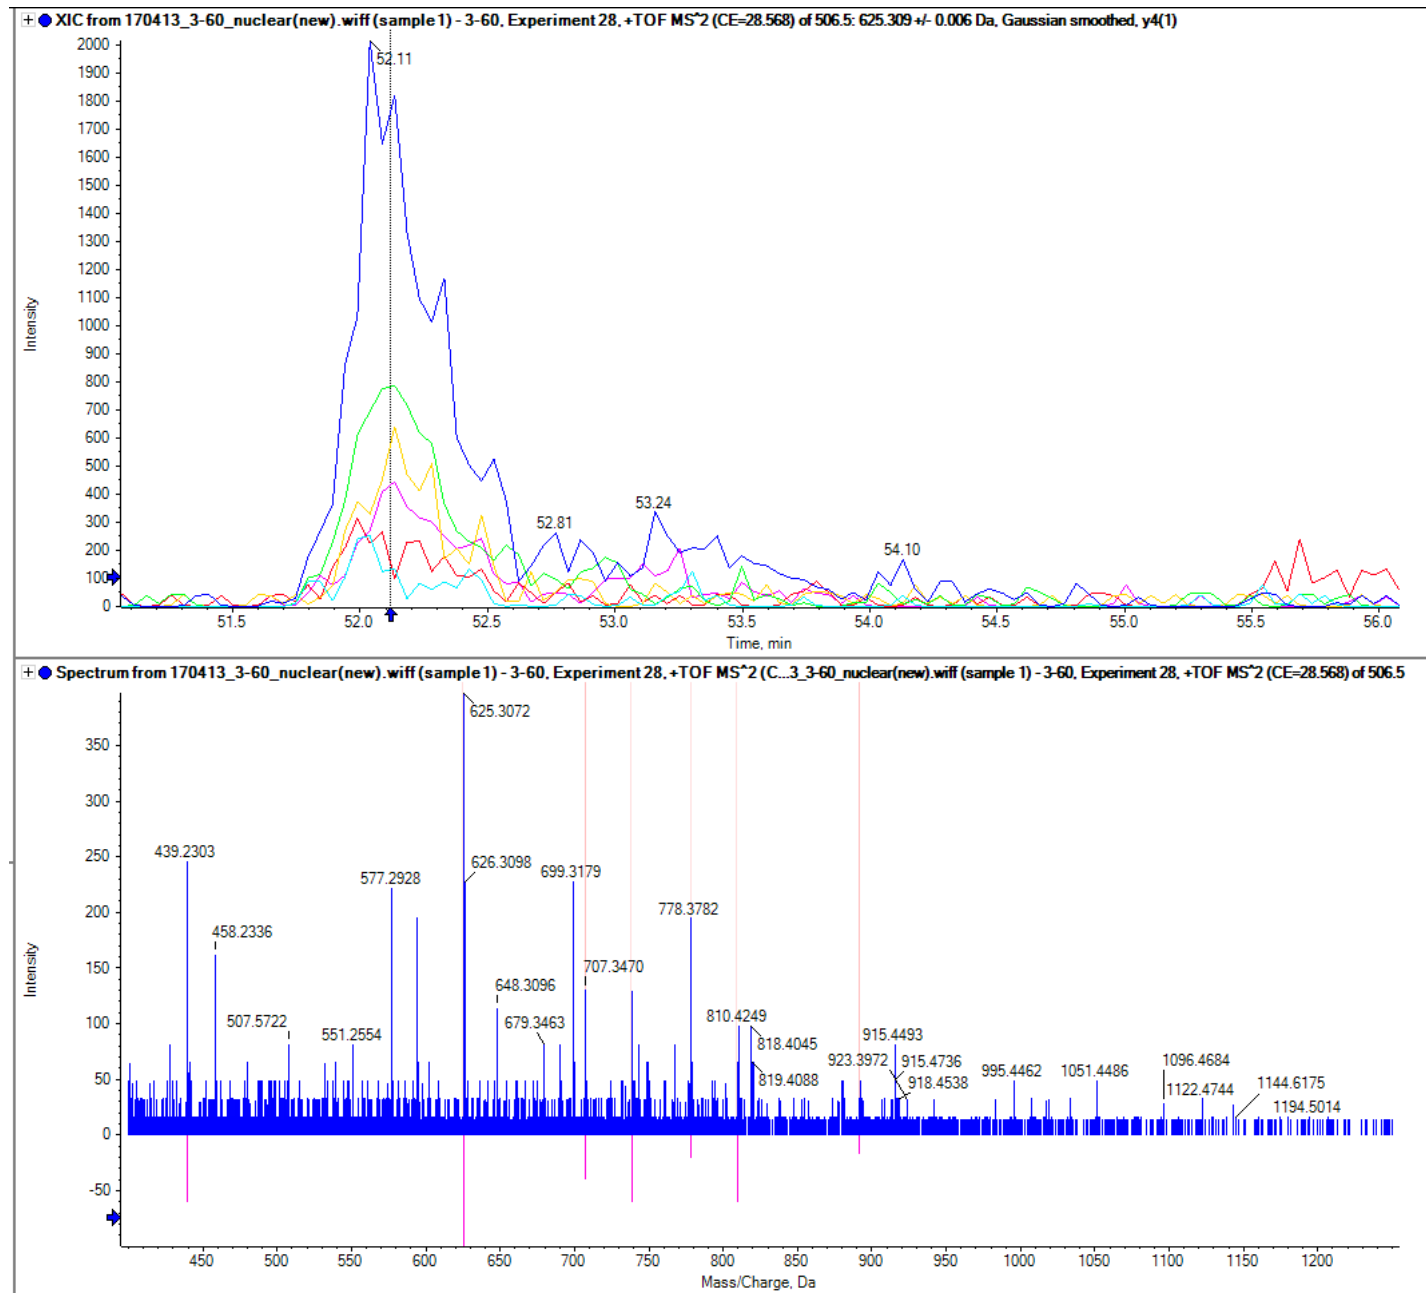

# Inositol-3-phosphate synthase 1

SVLVDFLIGSGLK

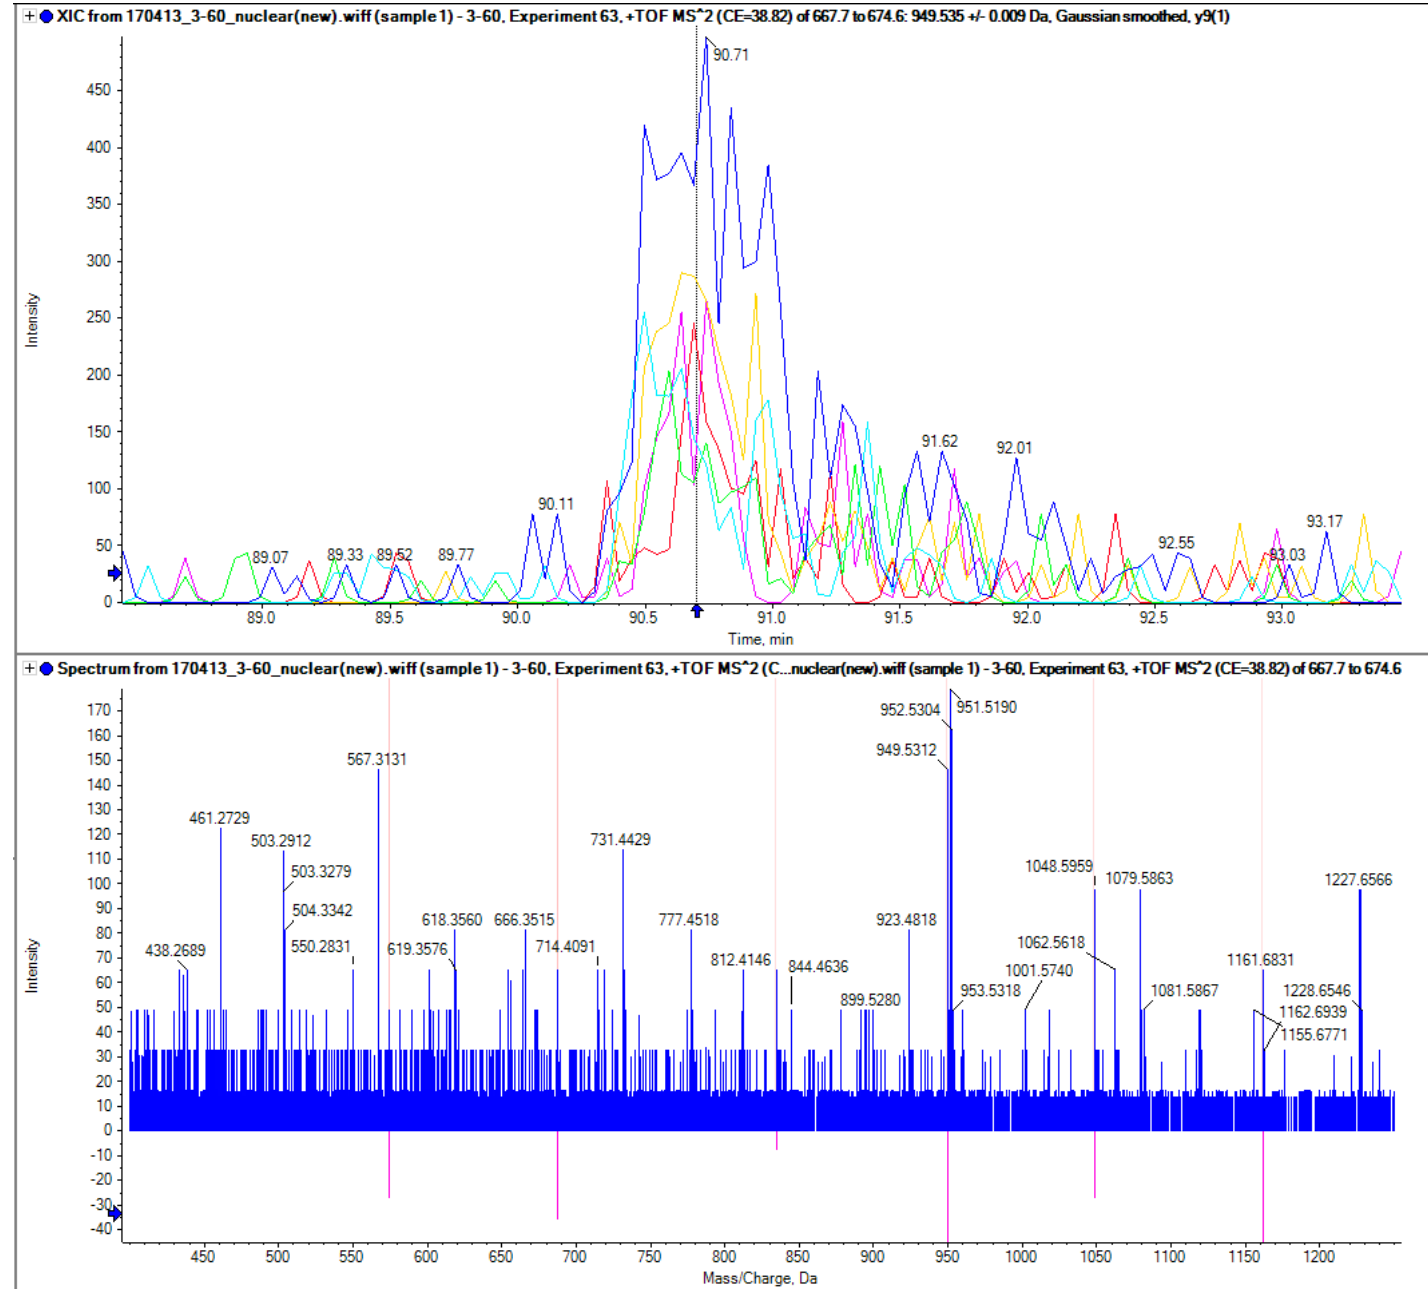

Keratin, type I cytoskeletal 14

LSSSQFSSGSQSSR

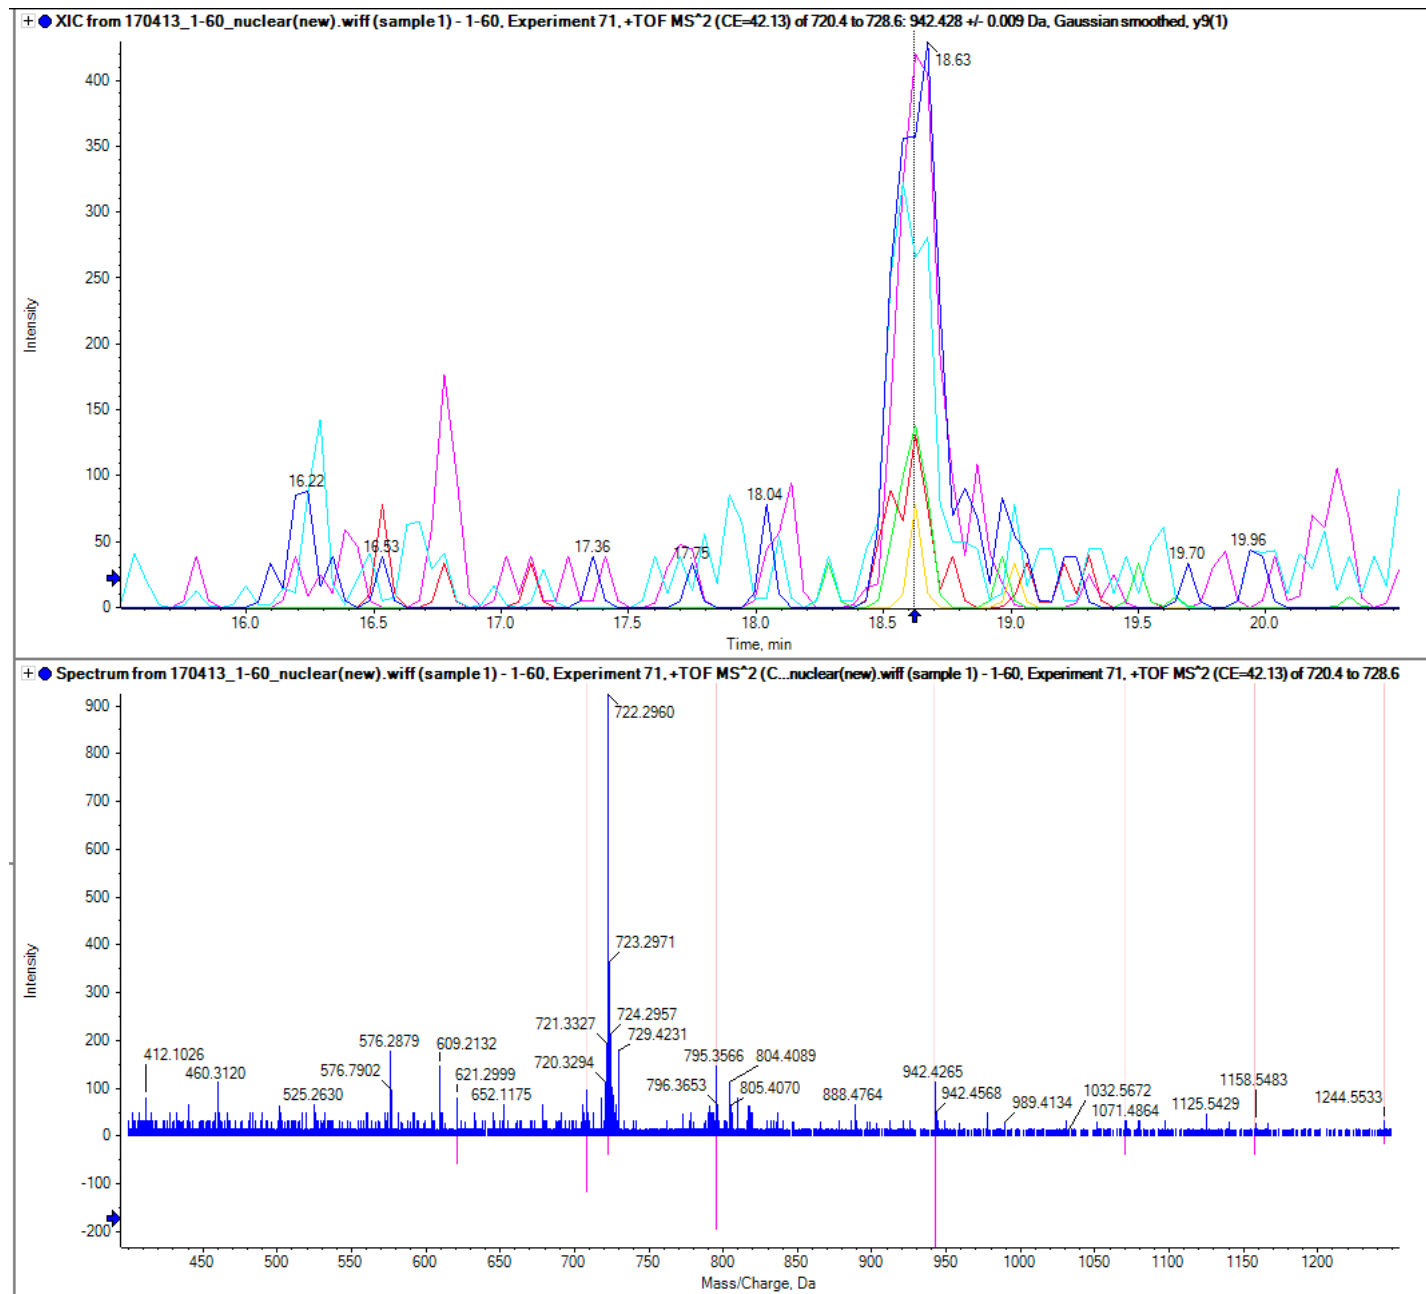

# Vesicle transport protein

PVLGSLNLPGIR

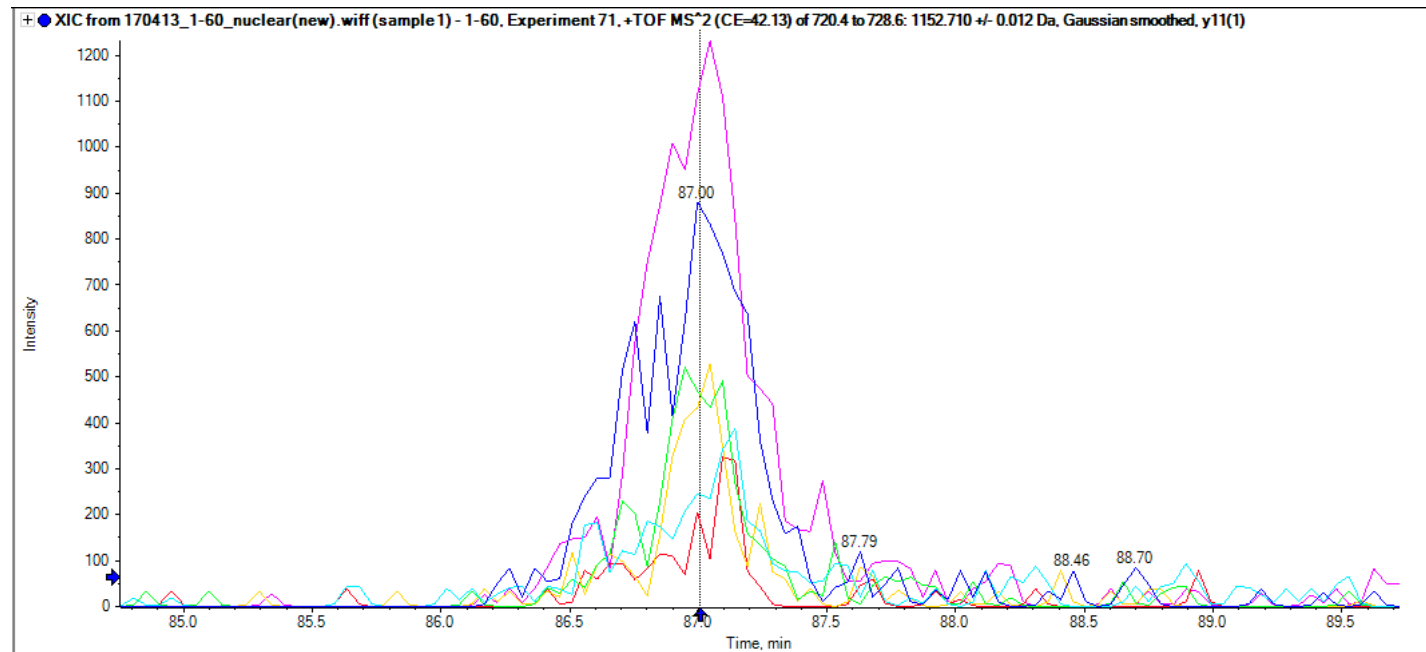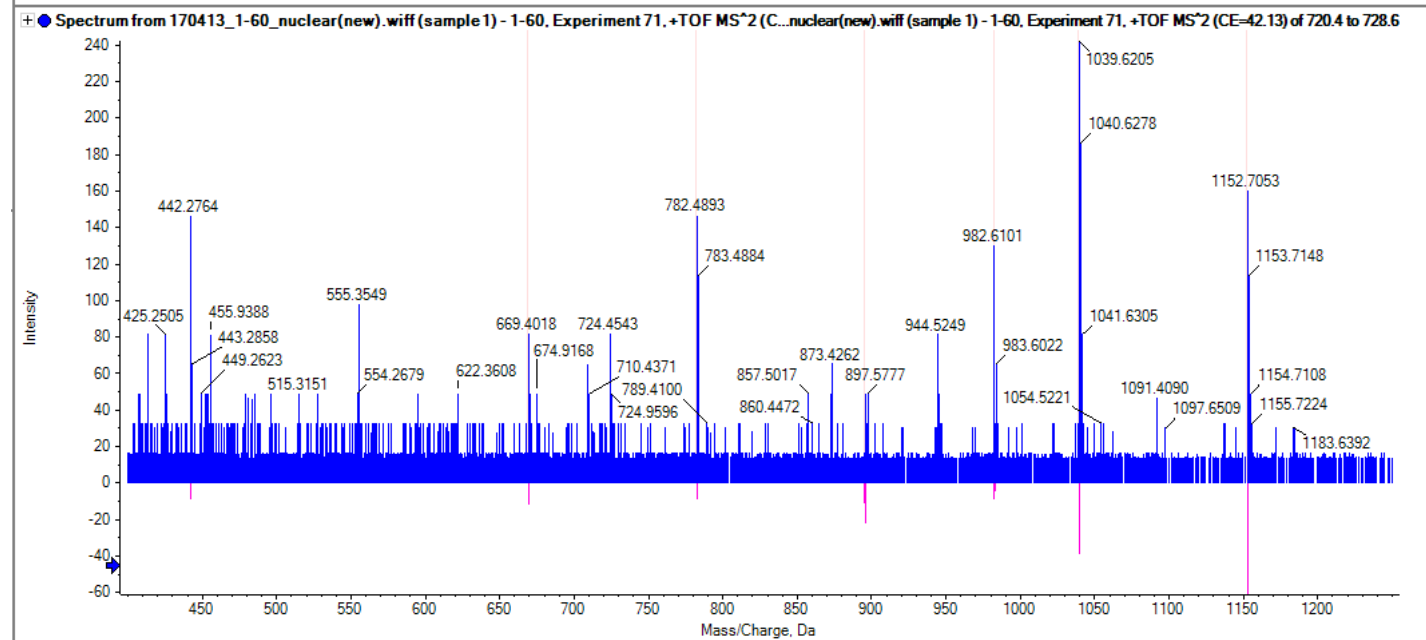

# Histone H2AX

VGAGAPVYLAADVLEYLELAGNAAR

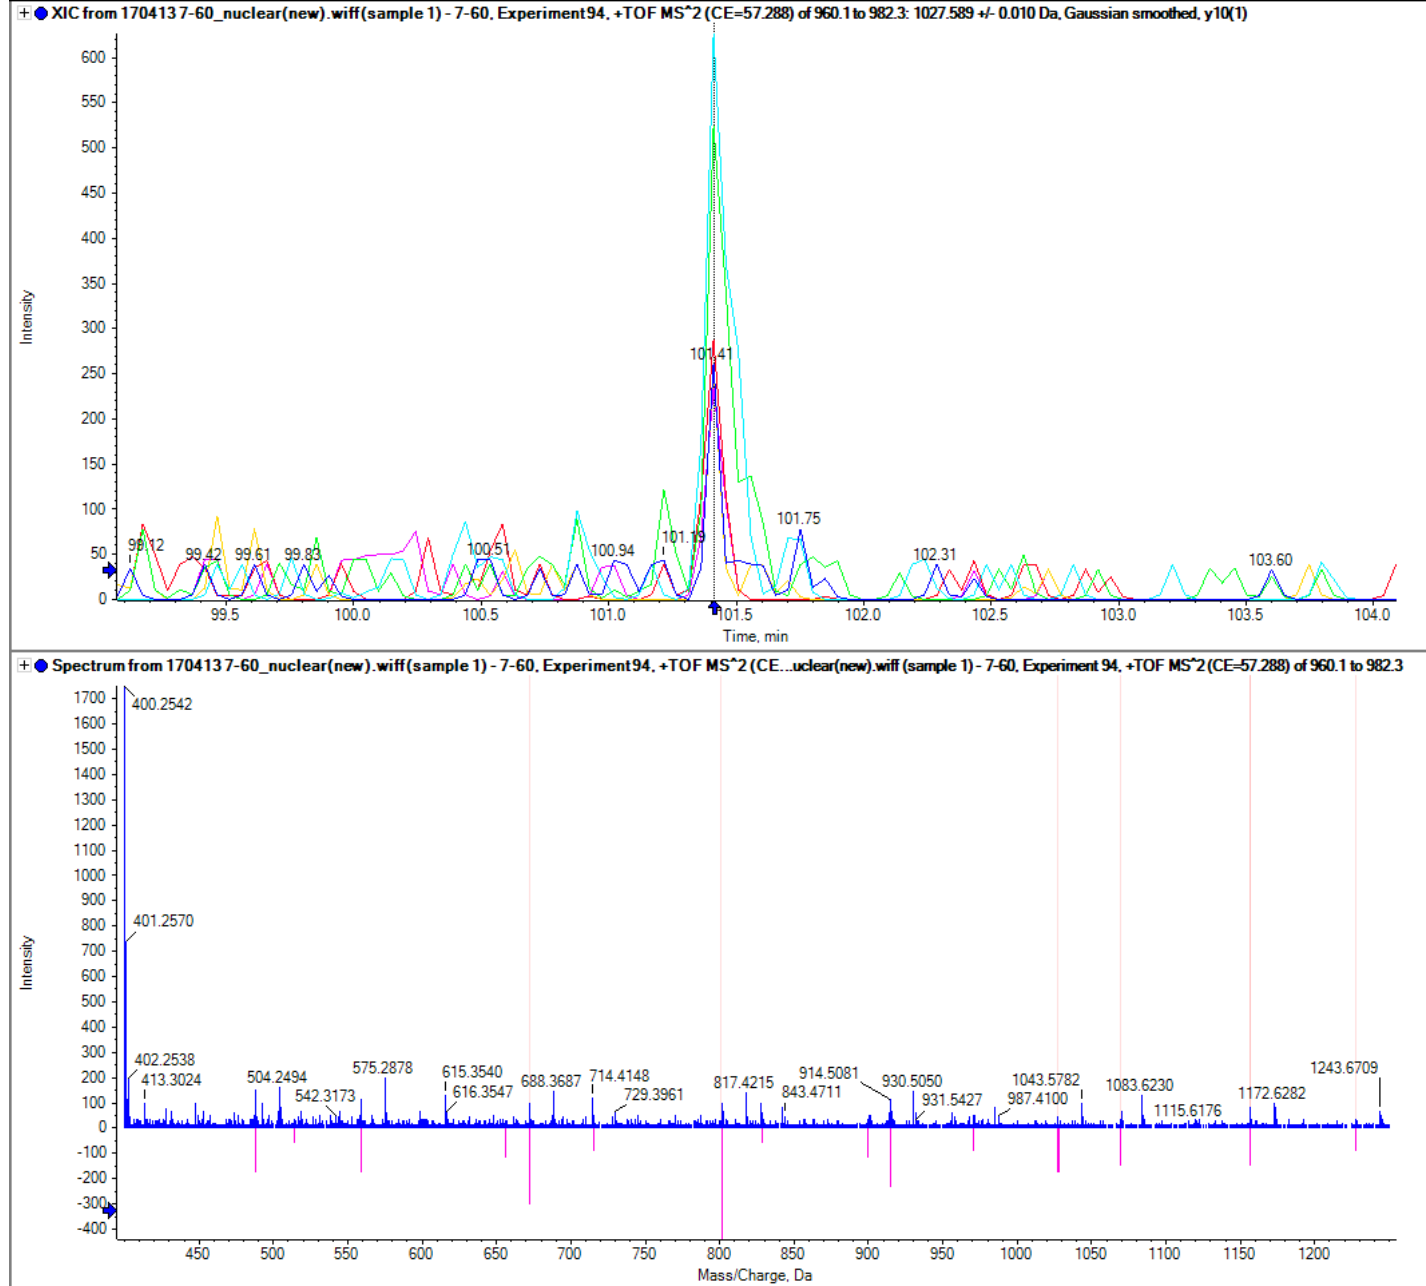

Keratin, type II cytoskeletal 6A

SGFSSVSVSR

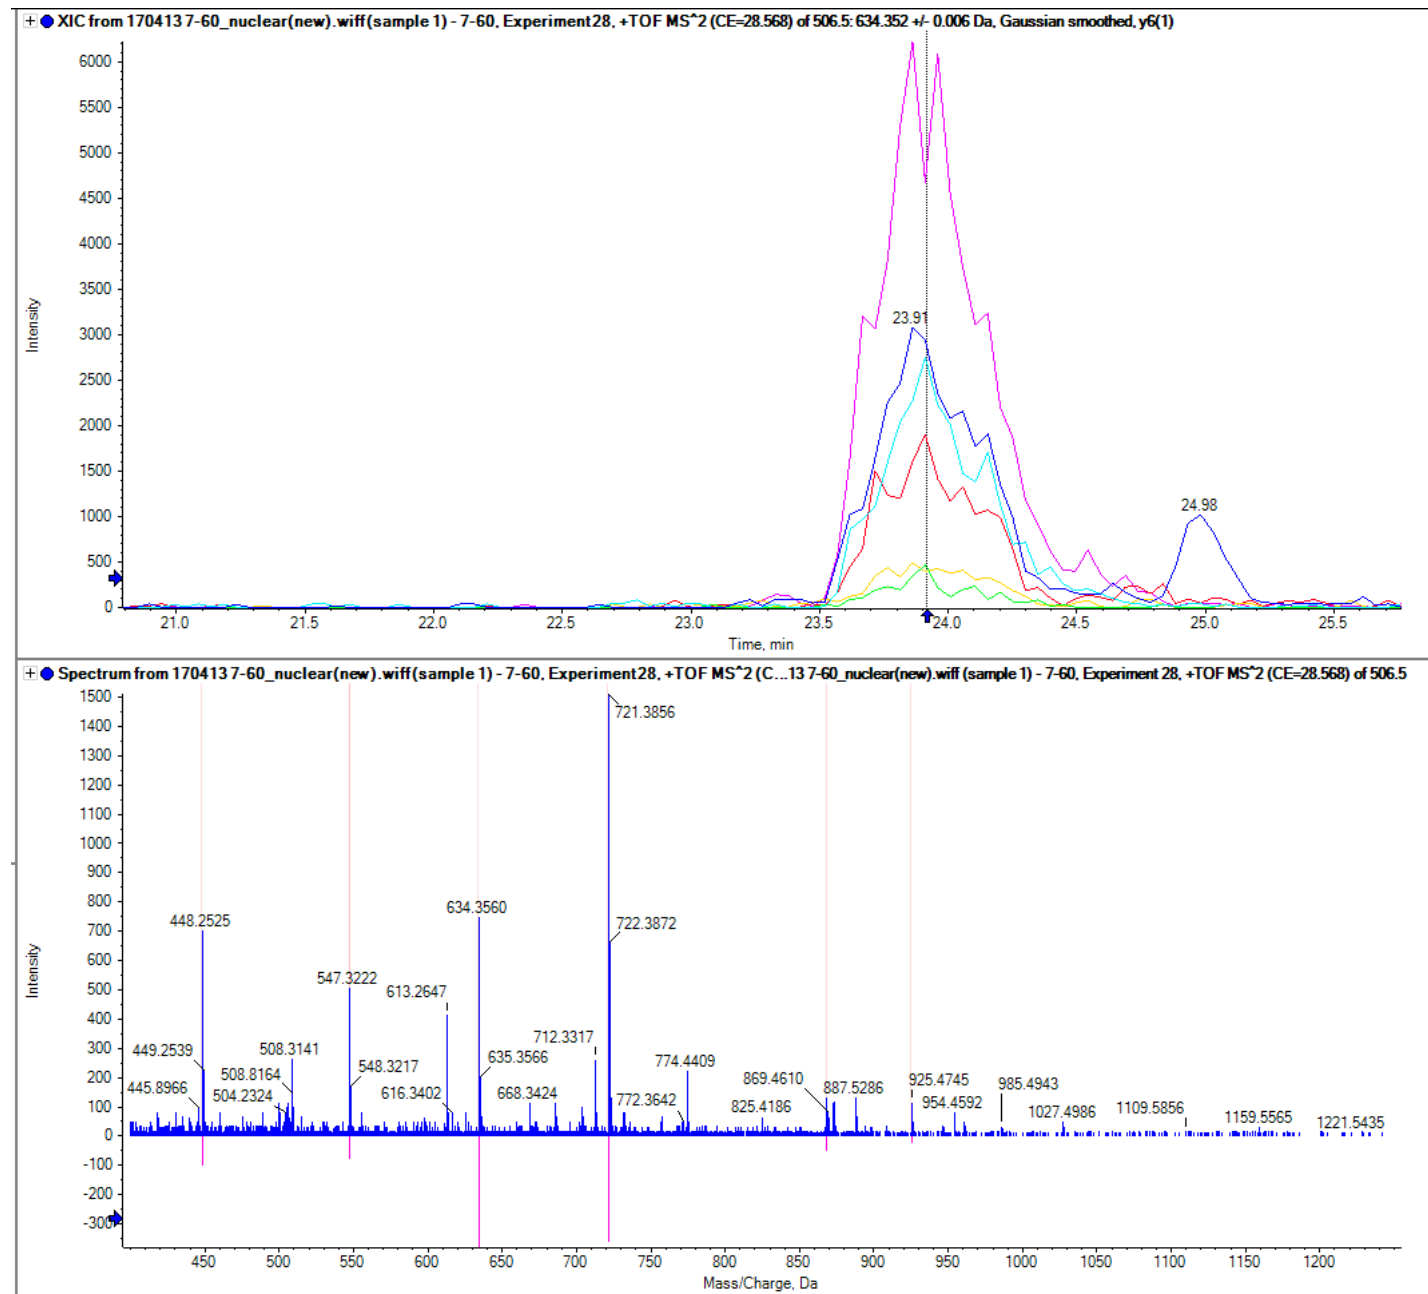

# Beta-hexosaminidase subunit alpha

EVIEYAR

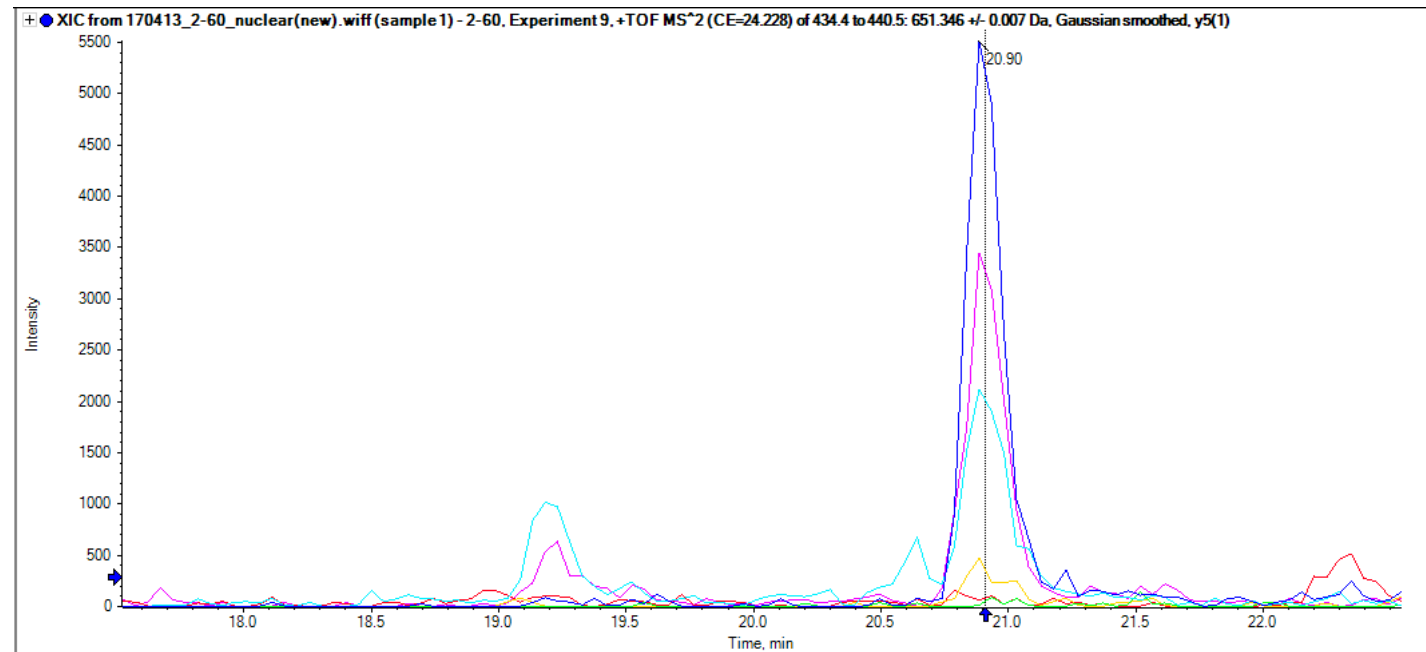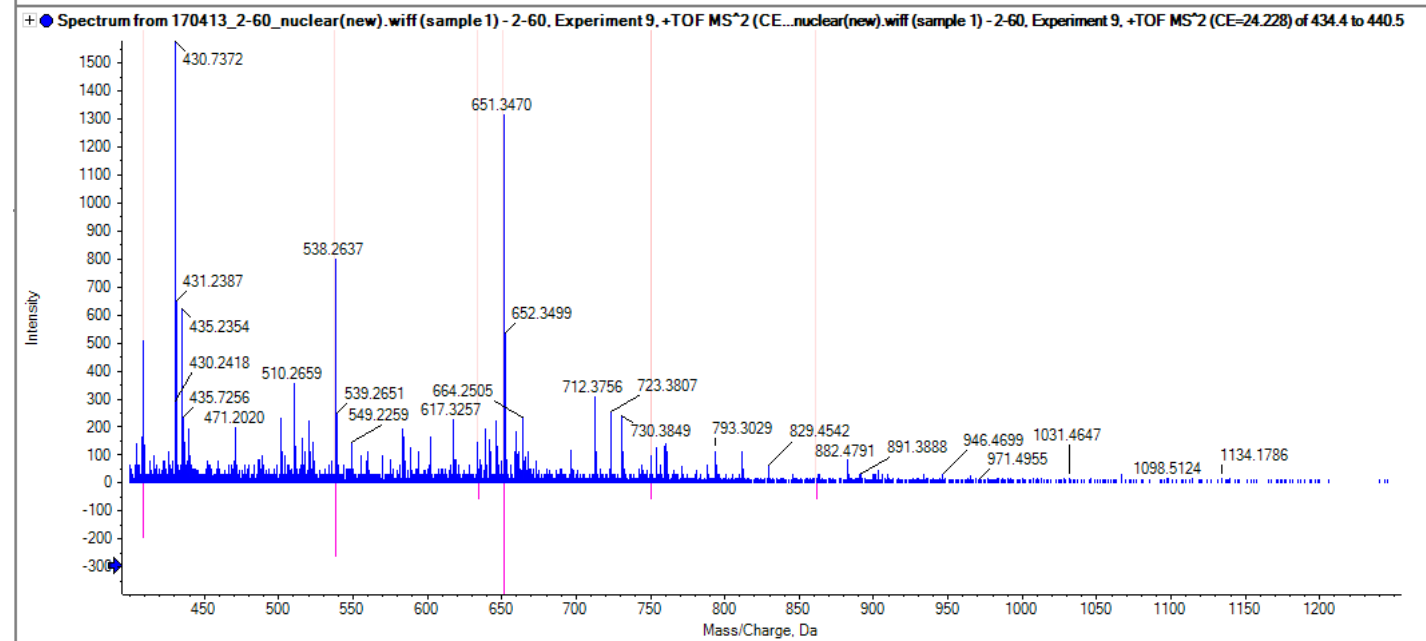

Aspartate-rich protein 1

FLPSSEEDNDDAK

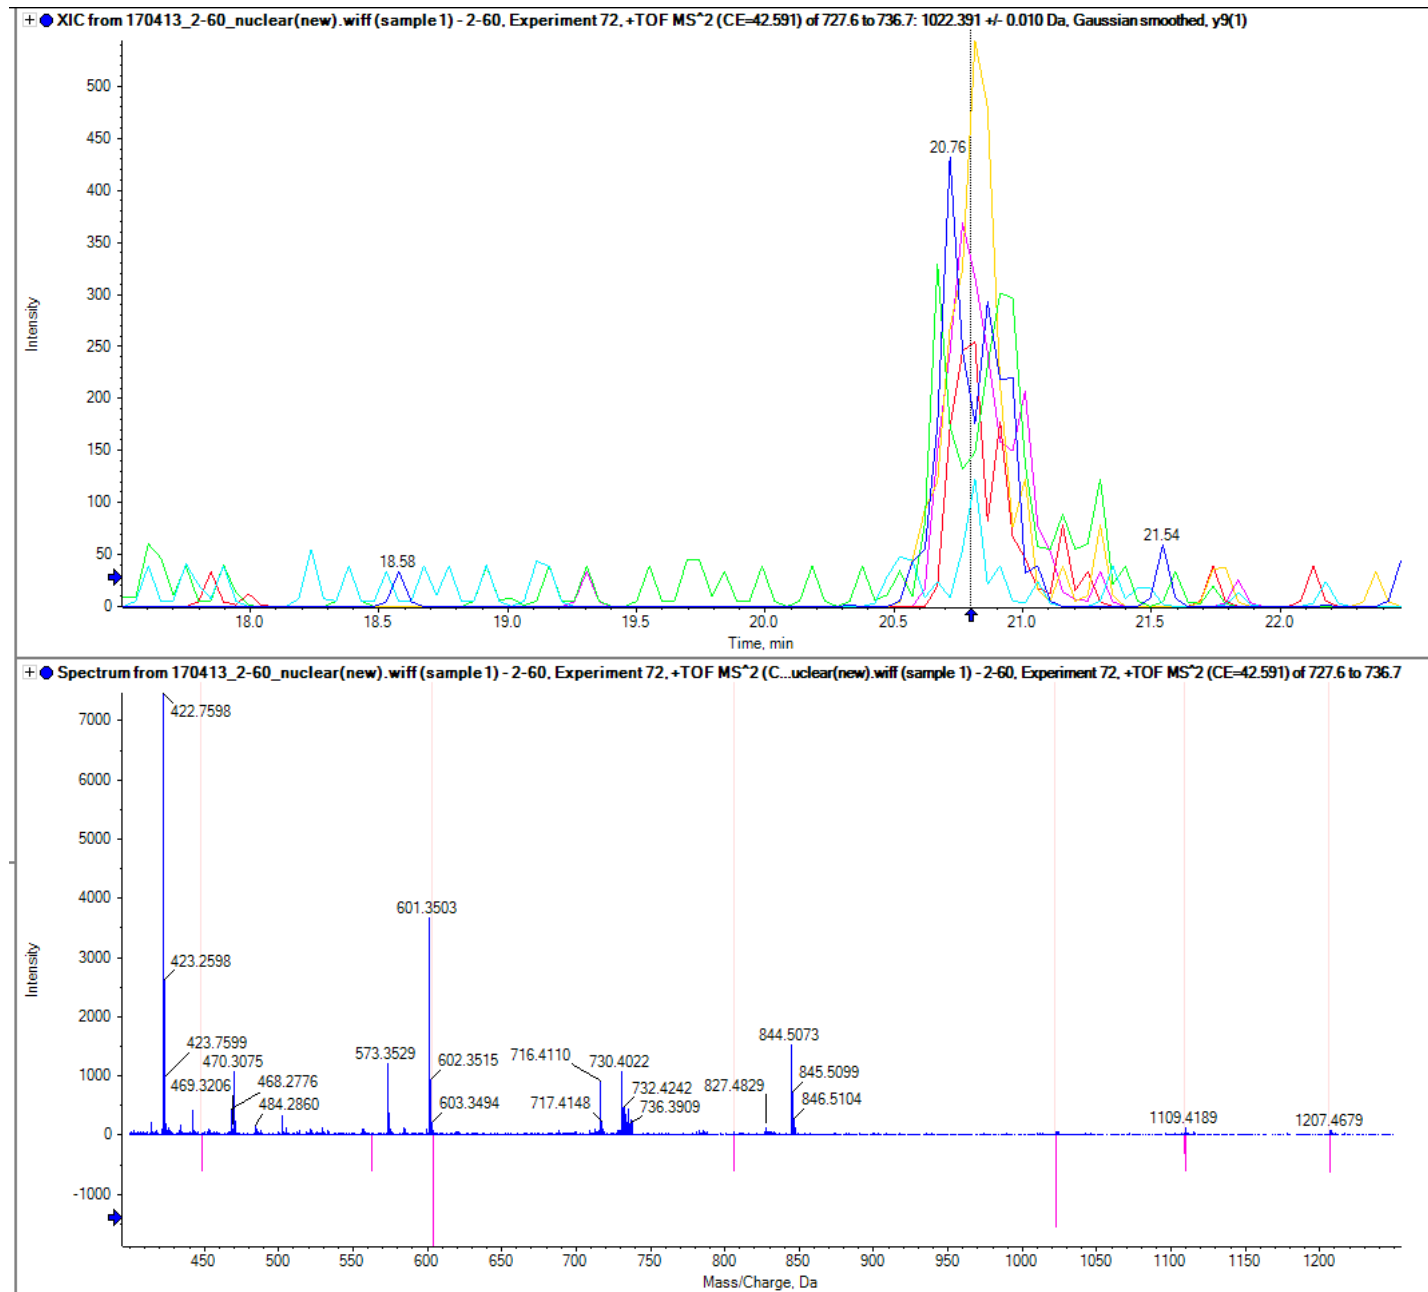



# Histone H2A-Bbd type 2/3

[+1R]-VLELAGNEAQNSGER

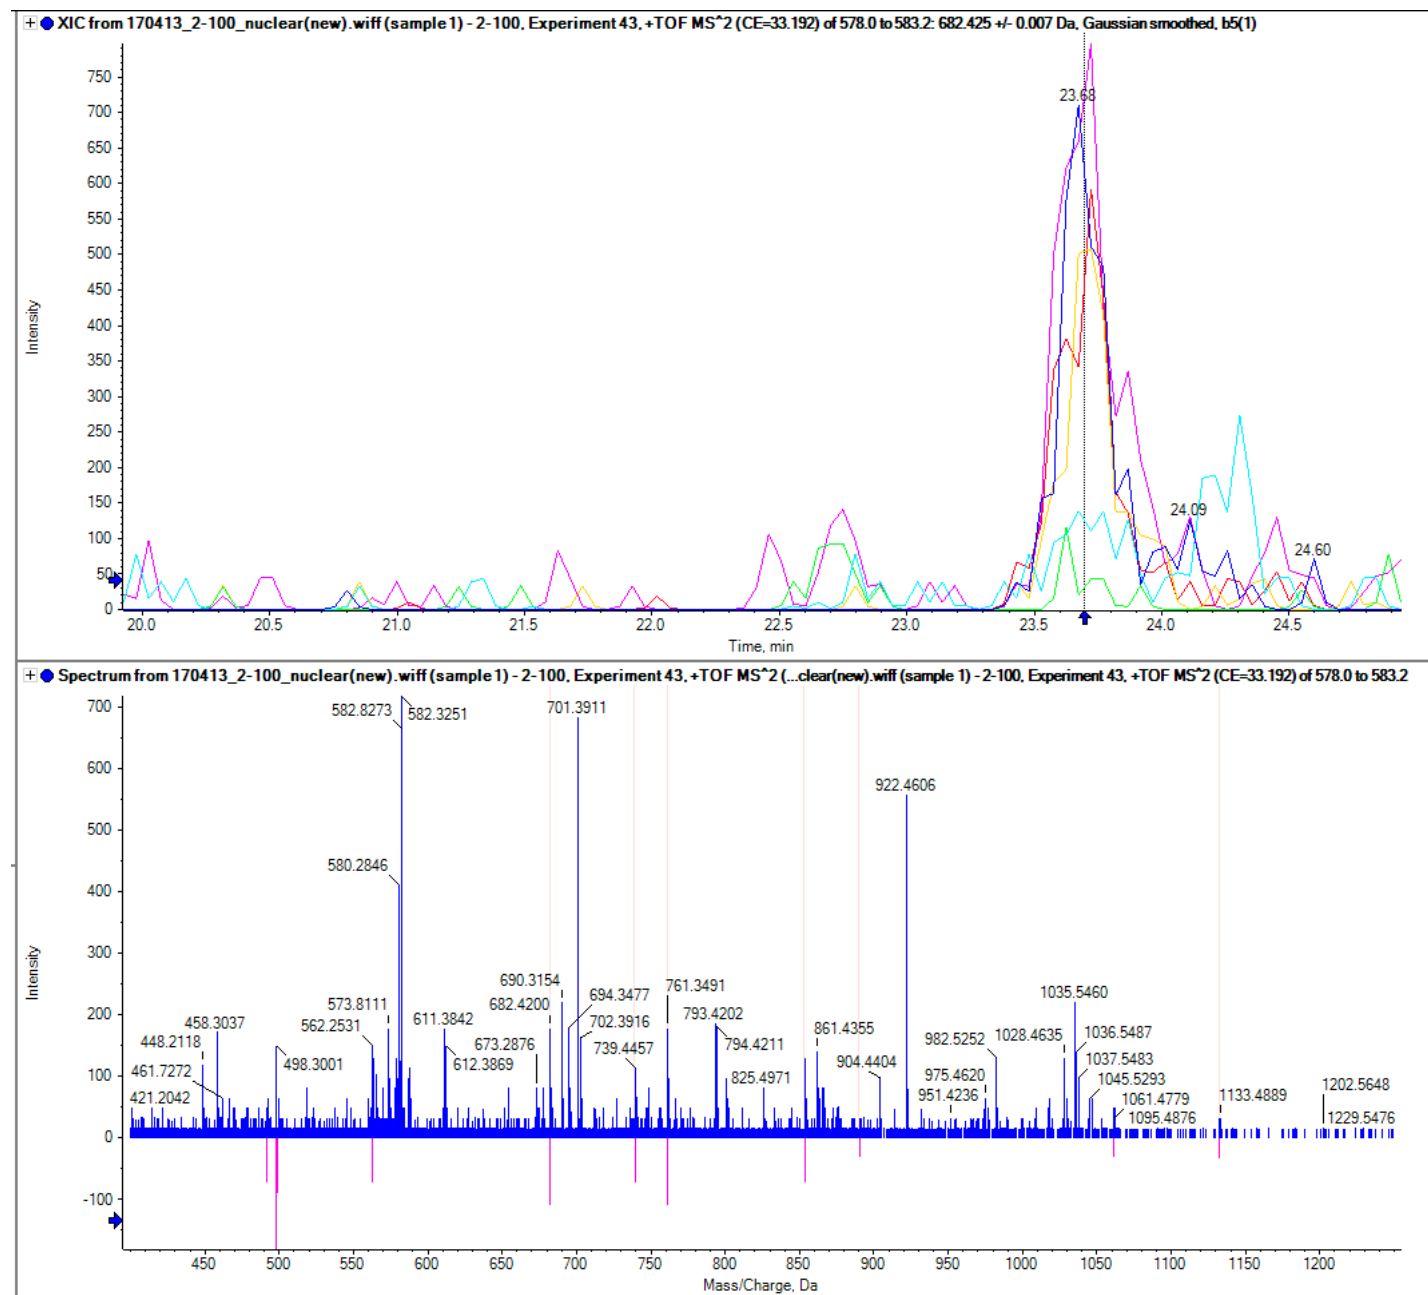

Filaggrin-2

FSNSSSNEFSK

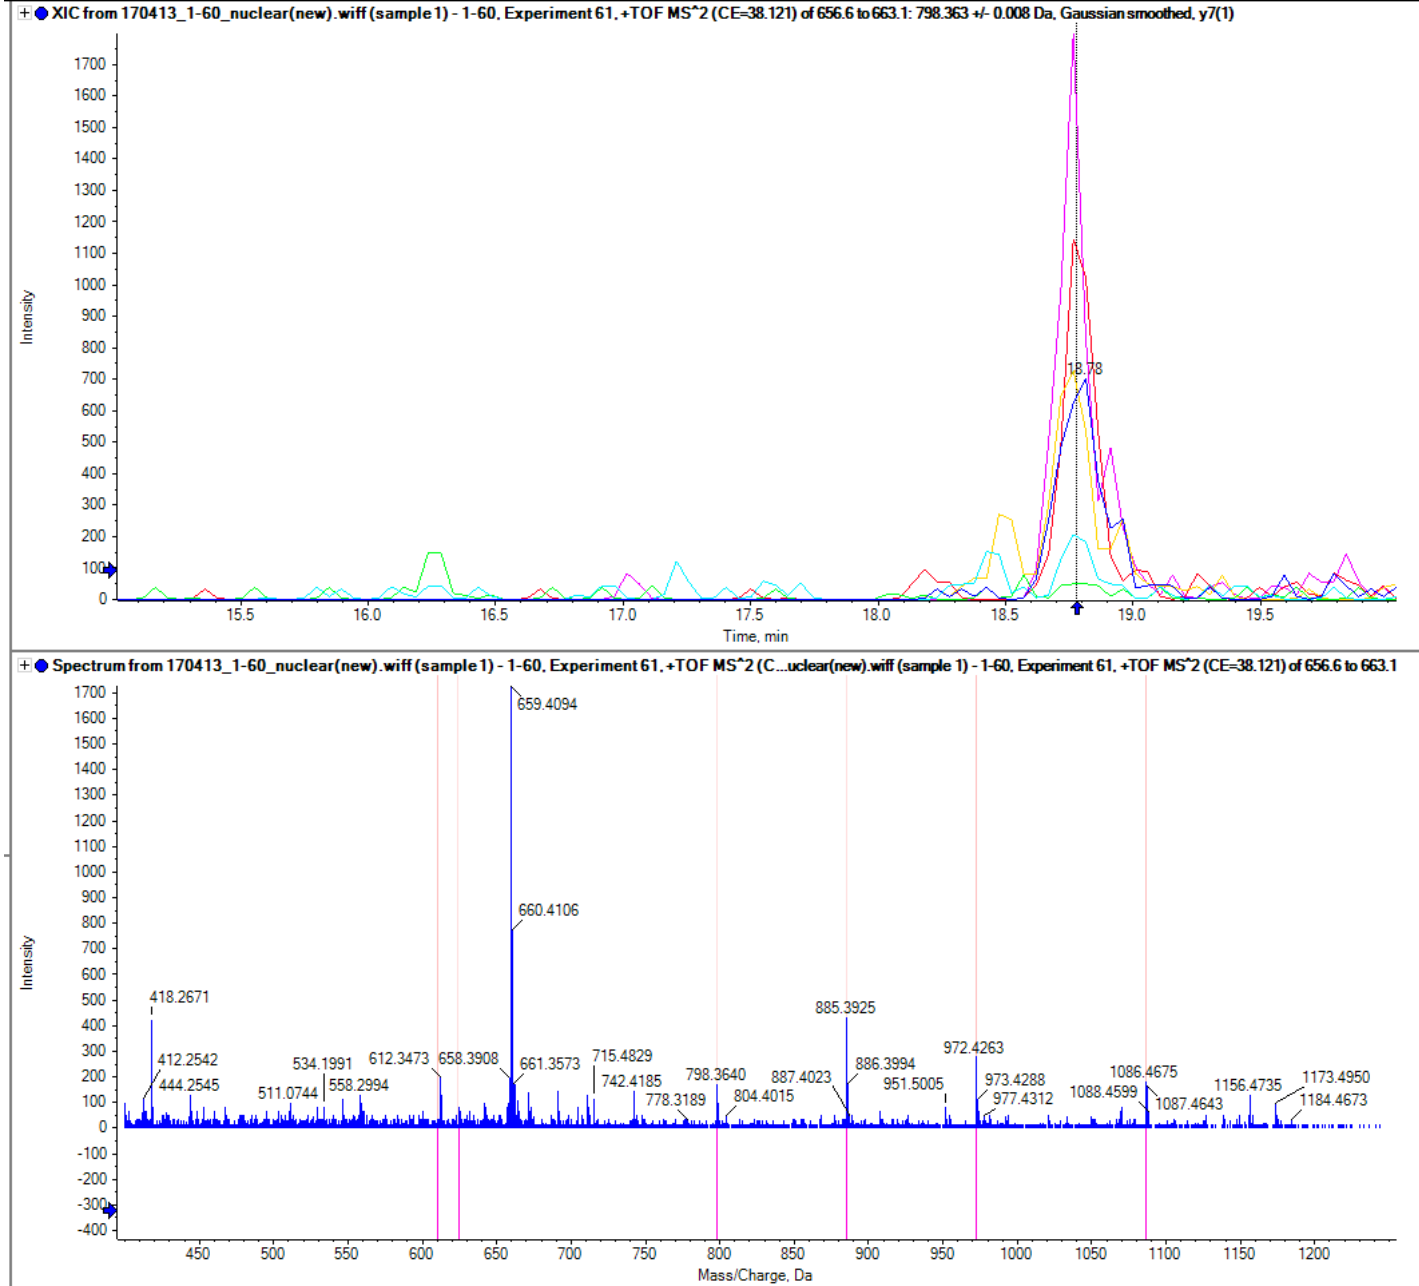

# 60S ribosomal protein L7a

VPPAINQFTQALDR

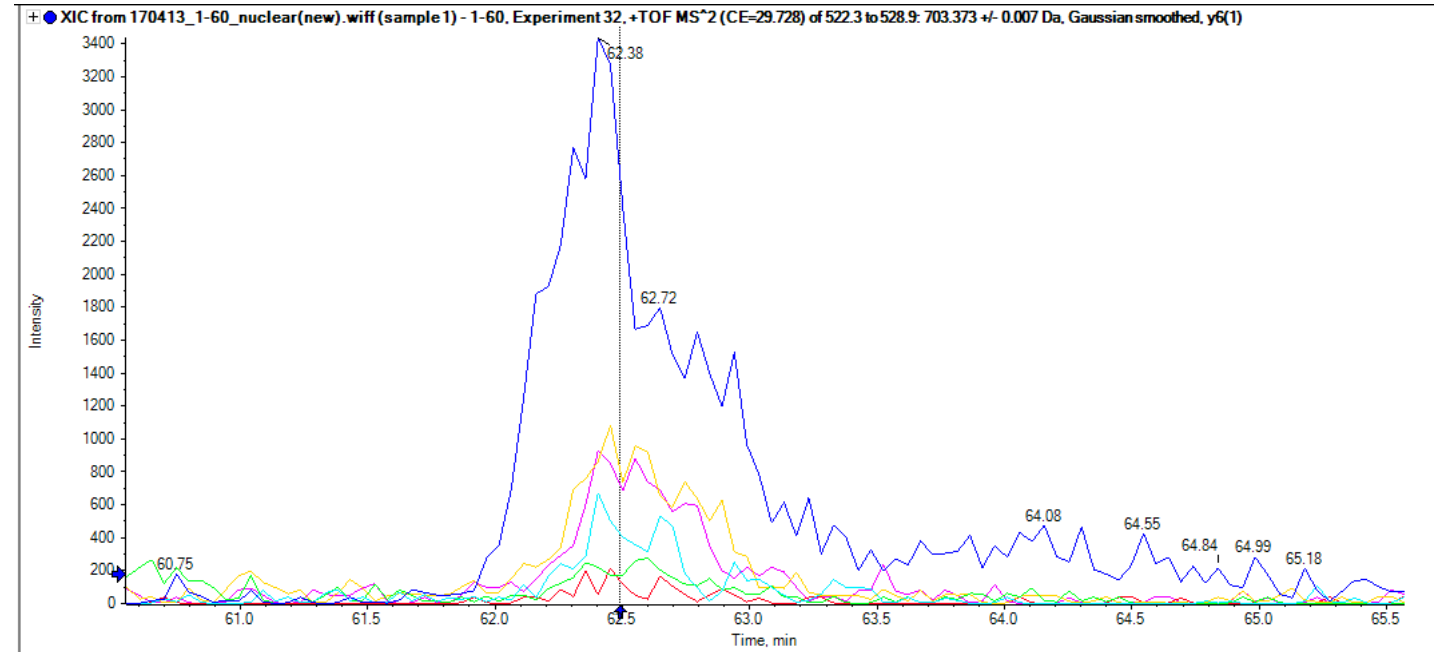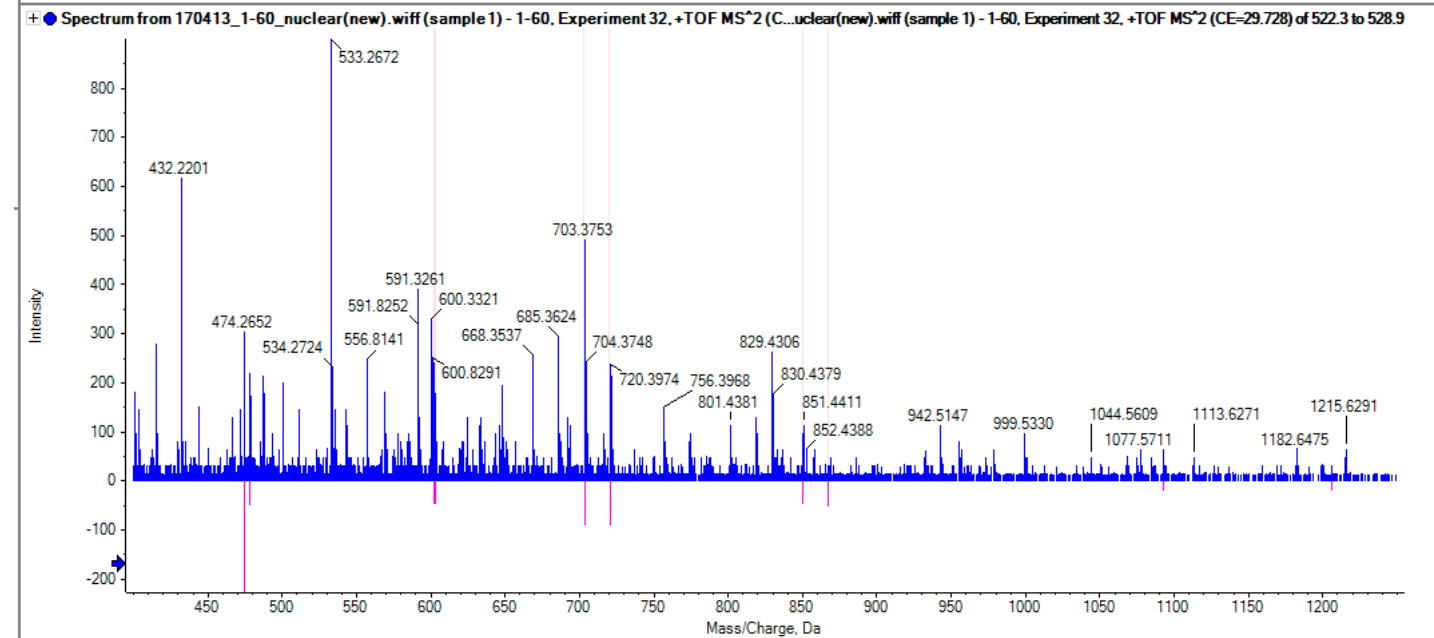

NADH-cytochrome b5 reductase 2

TLADHLGMIAGGTGITPMLQLIR

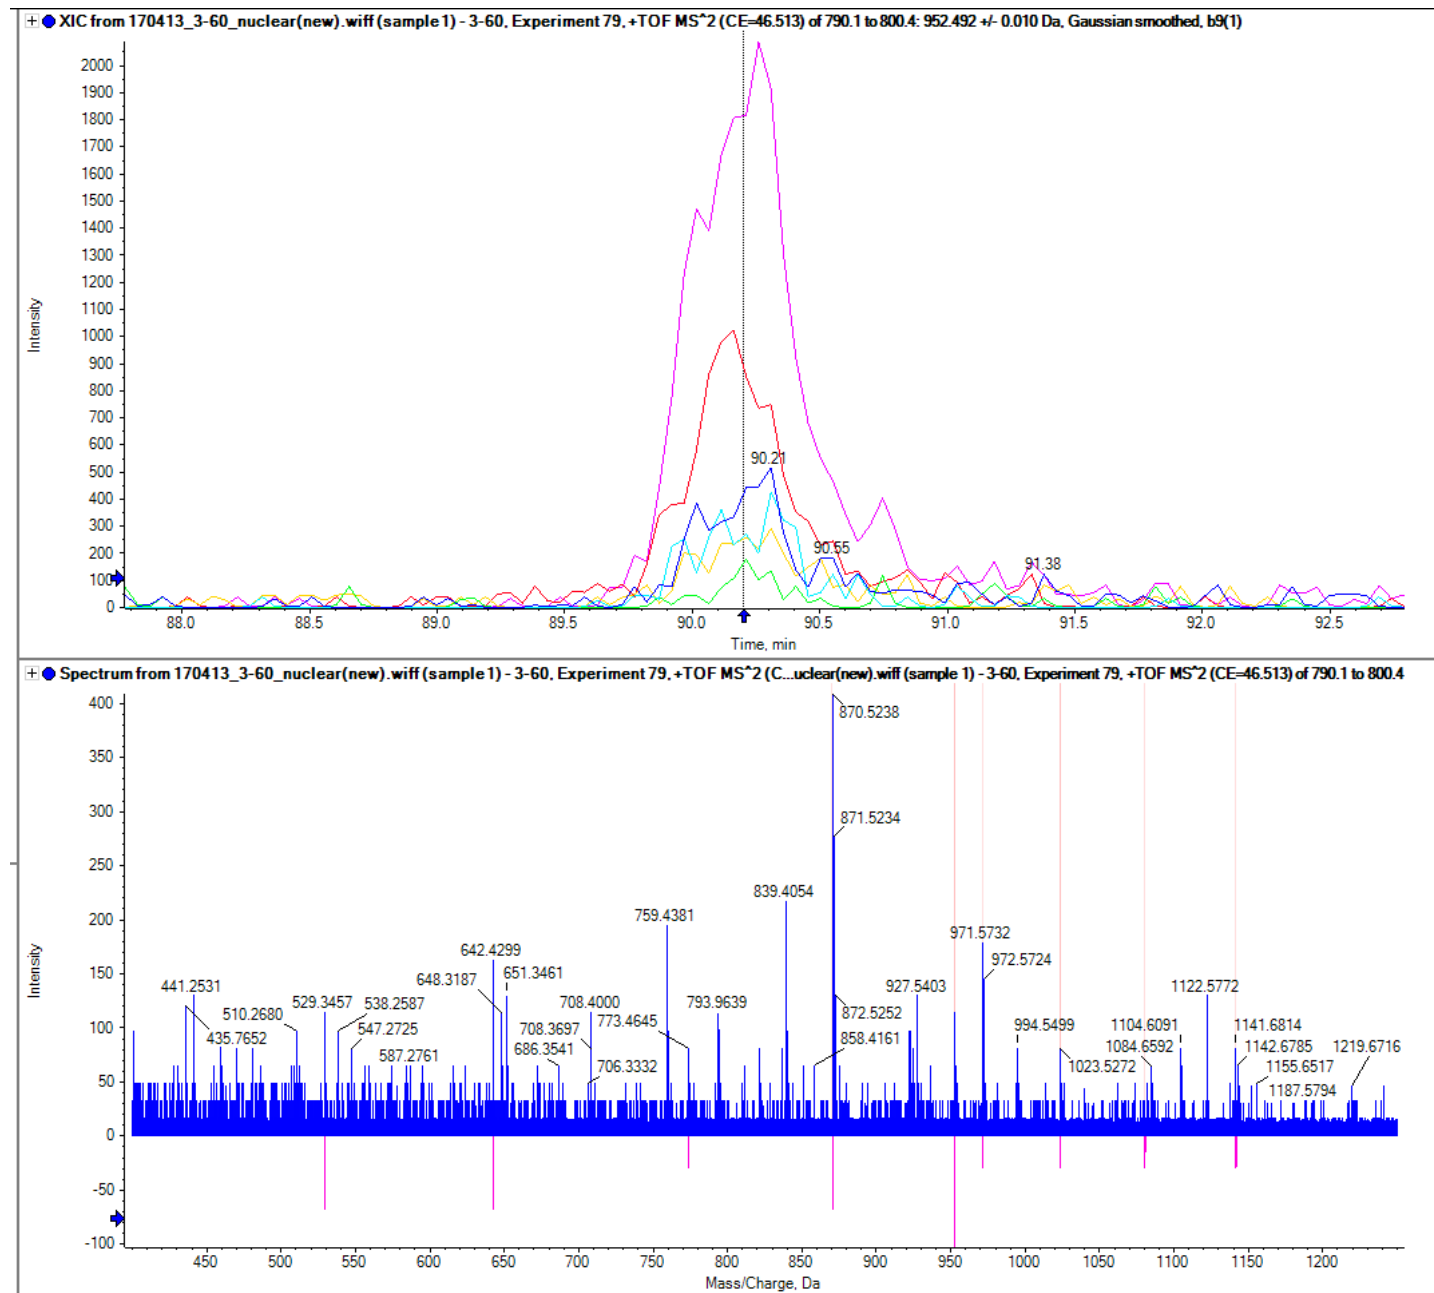

Glutamate-rich protein 3

AWKPTAEQPELAEFTEK

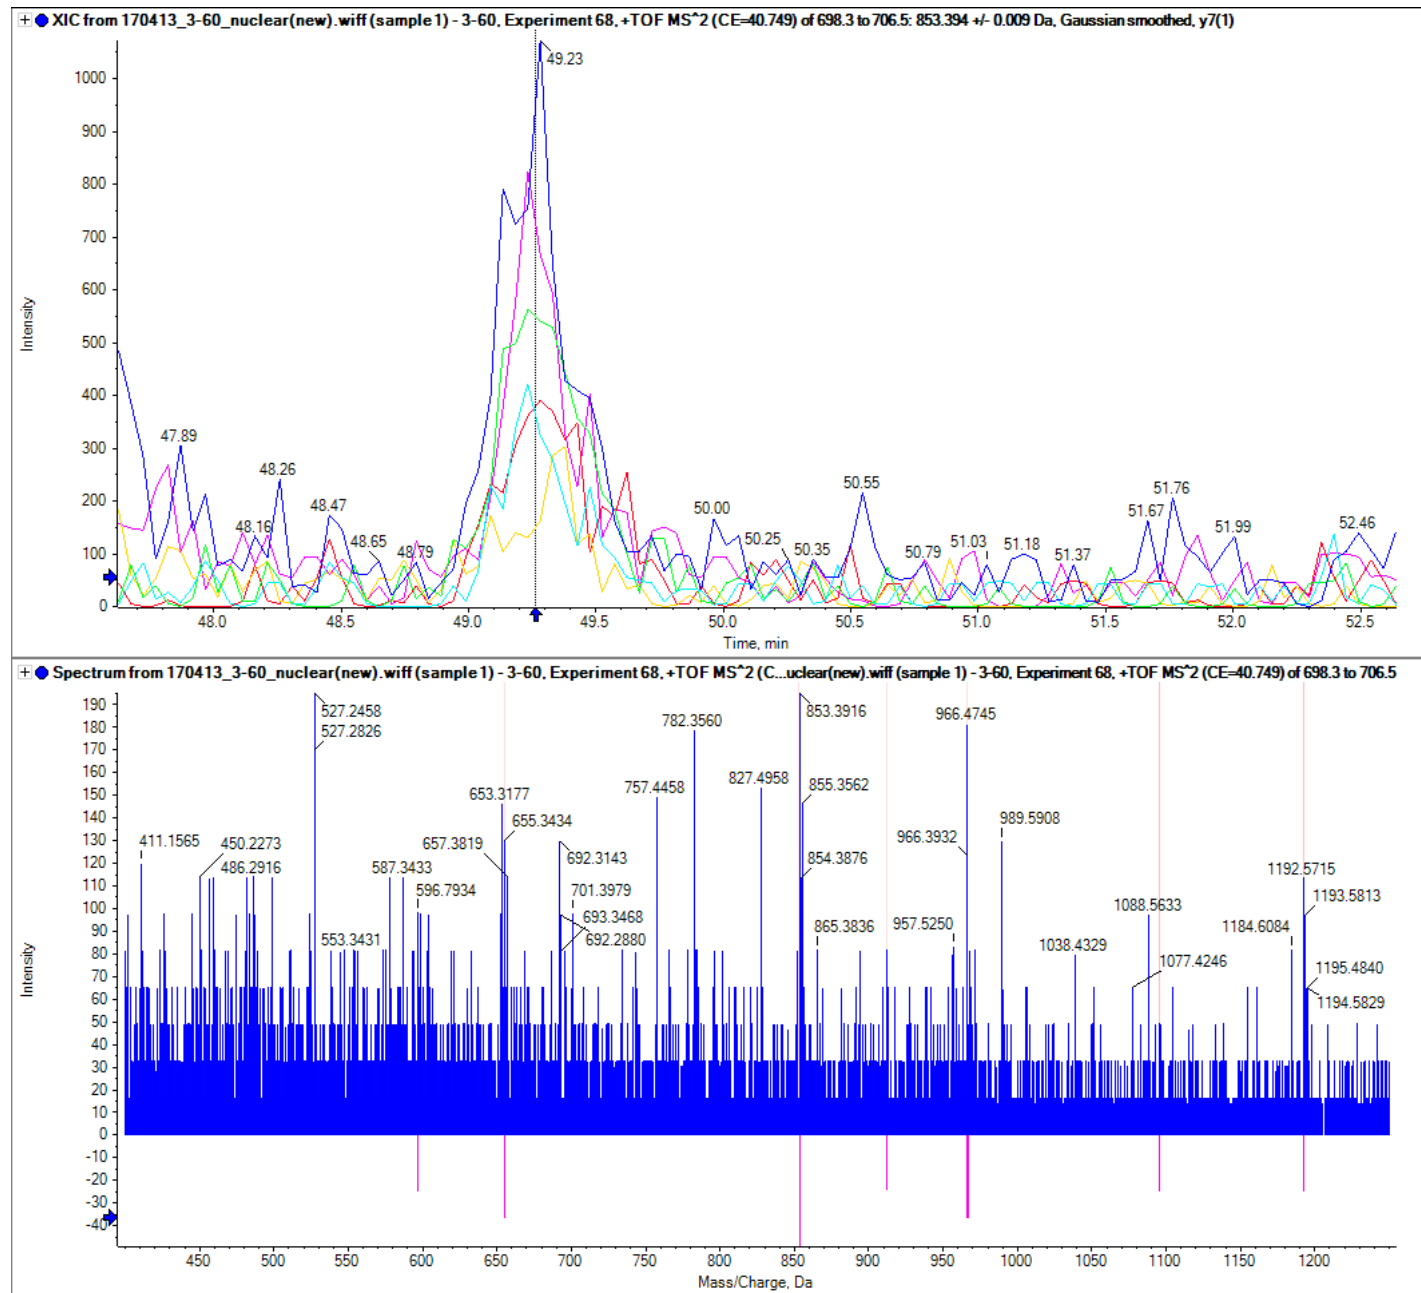

# Isoform 5 of Nitrilase homolog 1

RPDLYGNLGHPLS

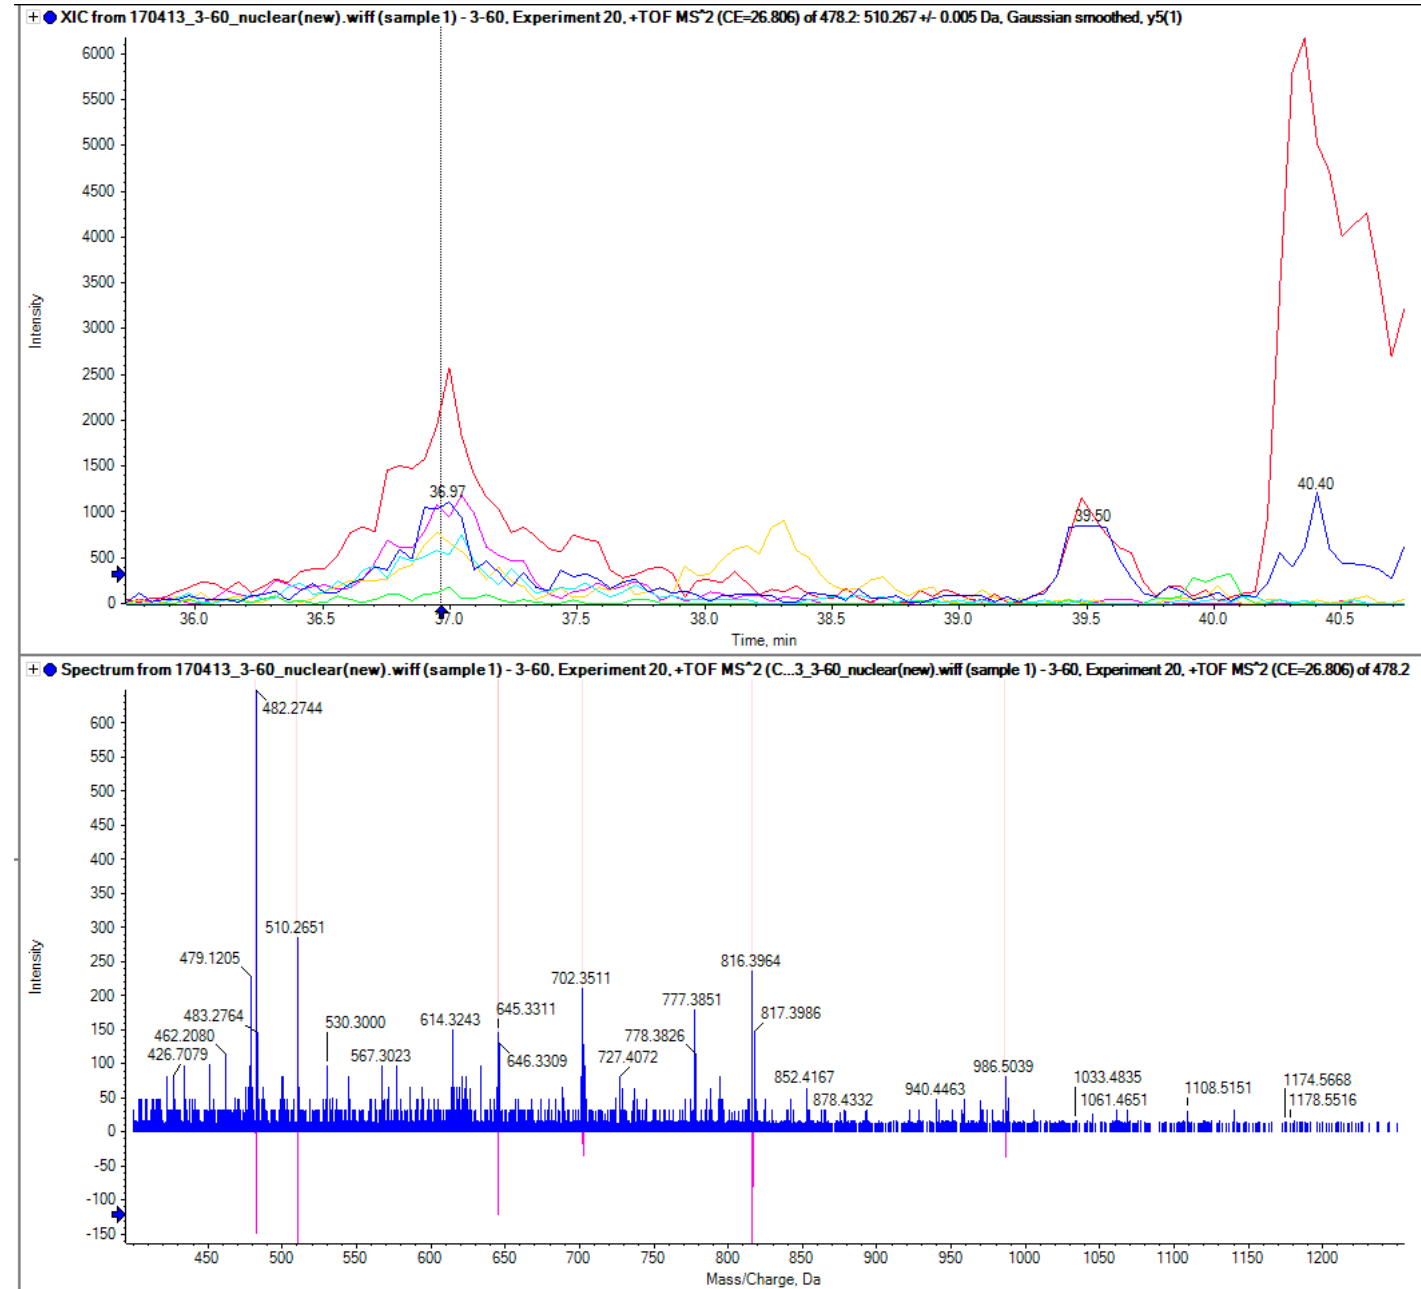

60S ribosomal protein L13

LATQLTGPVMPVR

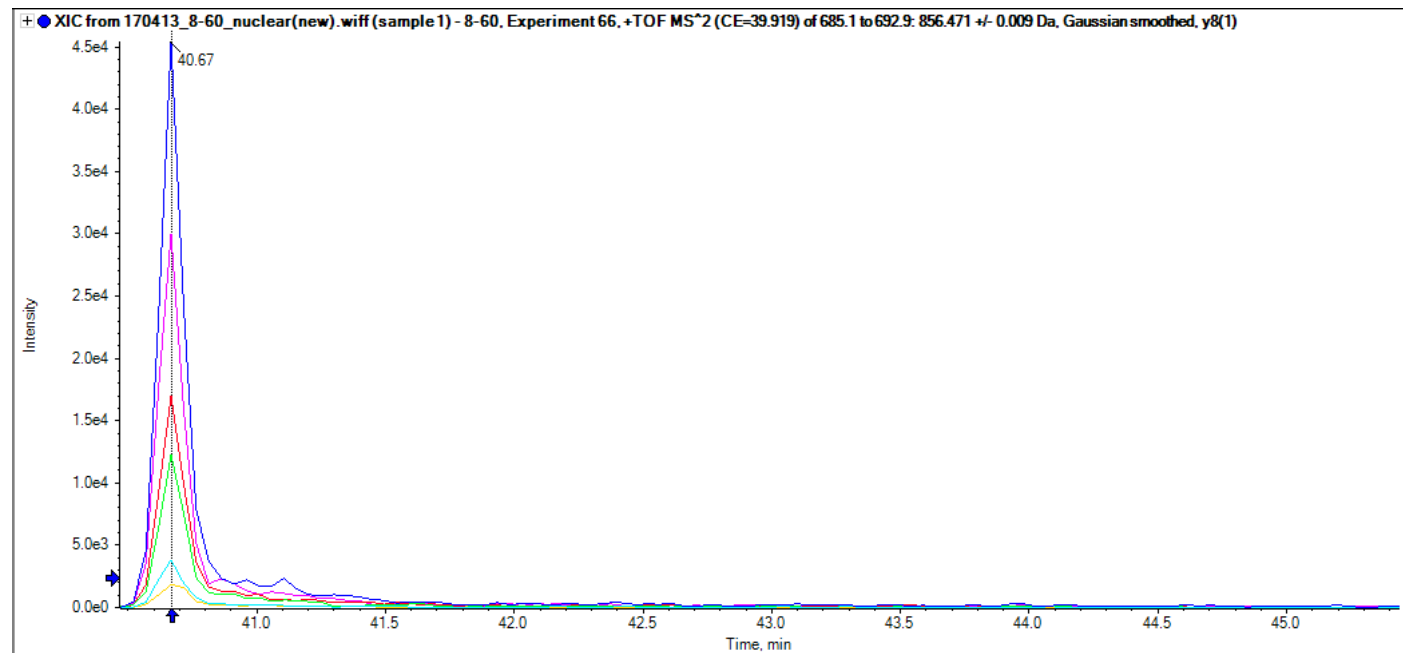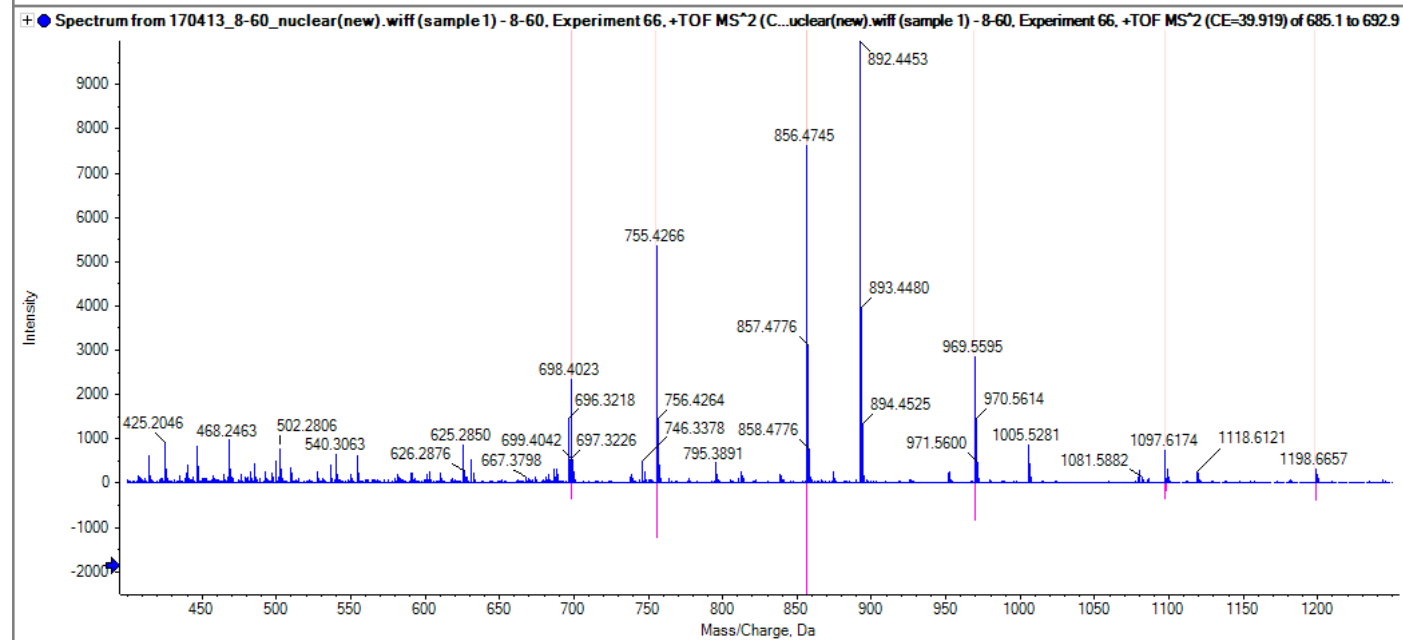

# EF-hand domain-containing protein 1

MALDPYTELR

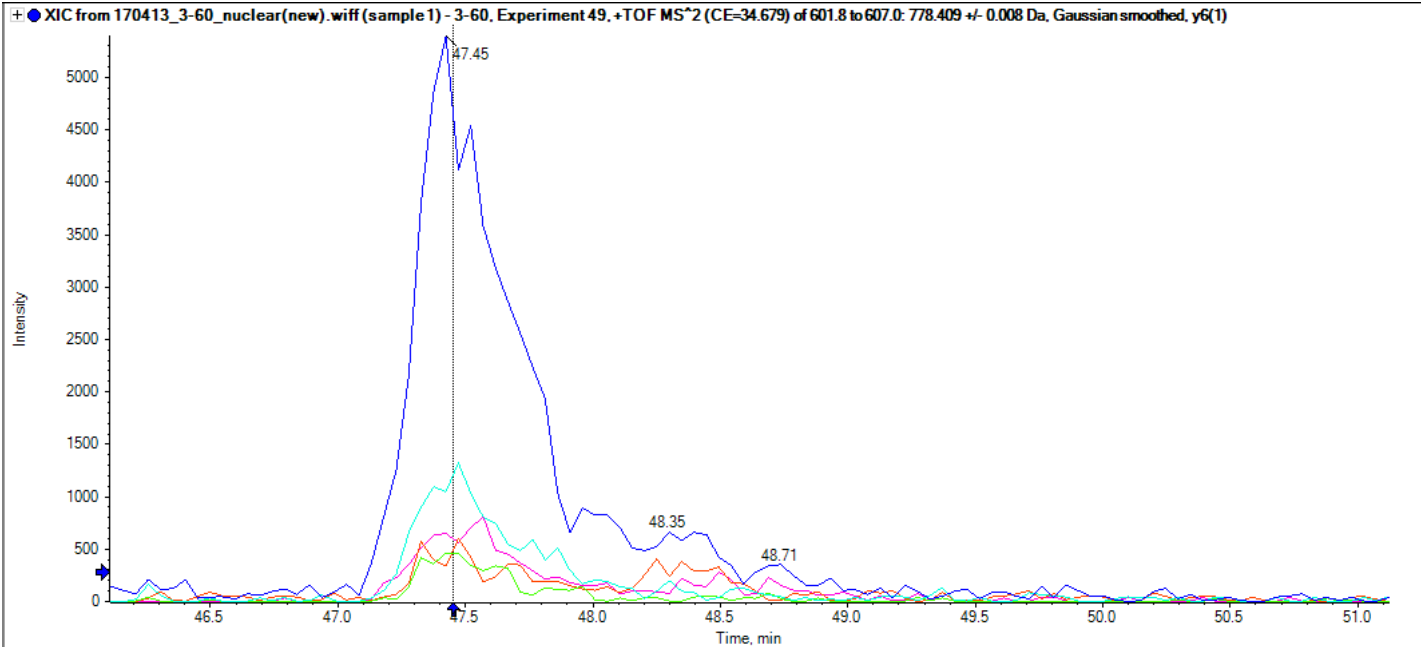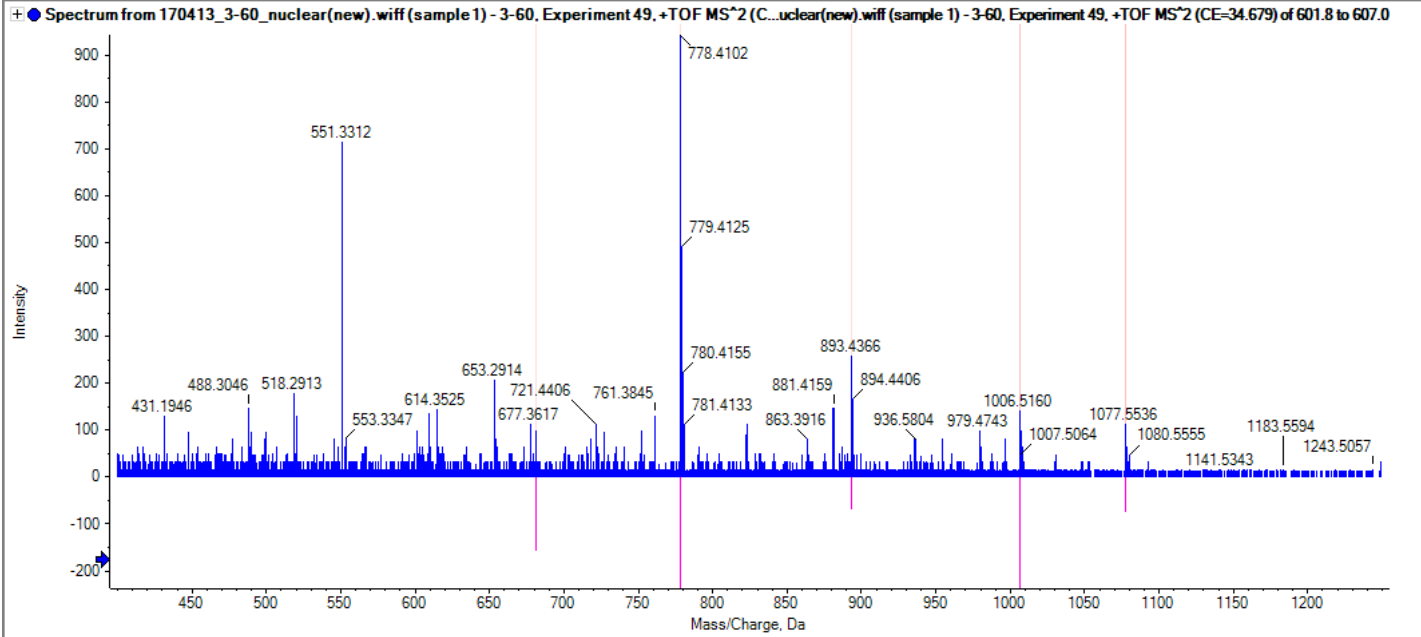



sp|Q9HAT0|ROP1A\_HUMAN

IGAGAPVYLAADVLEYLTAEILELAGNASR

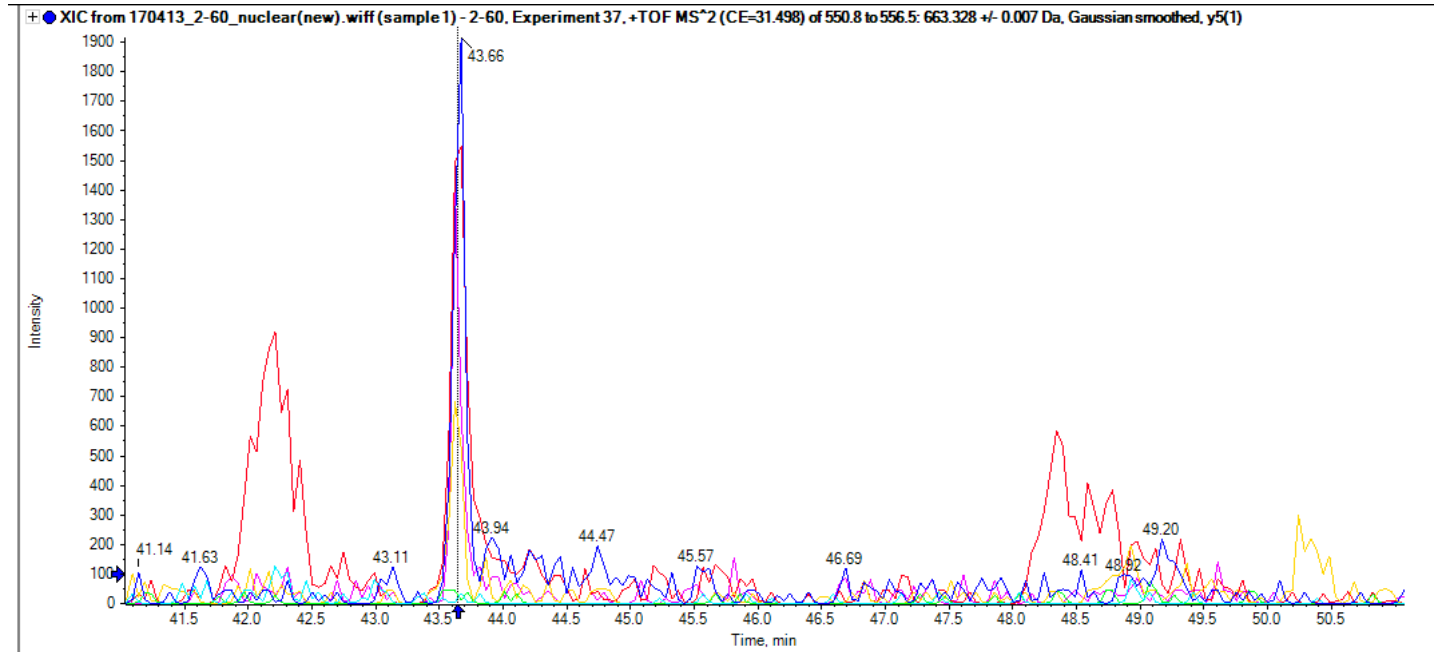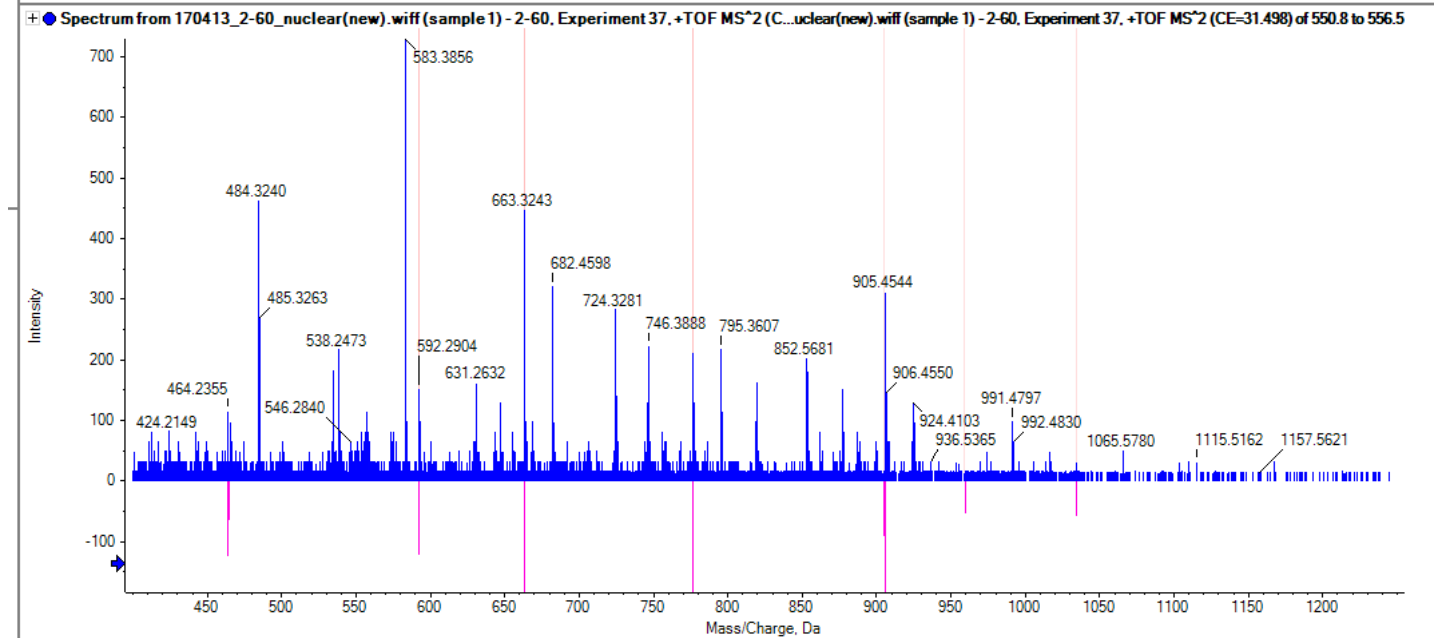

# Histone H2A type 1-A

MGAGAPVYLAADVLEYLTAEILELAGNASR

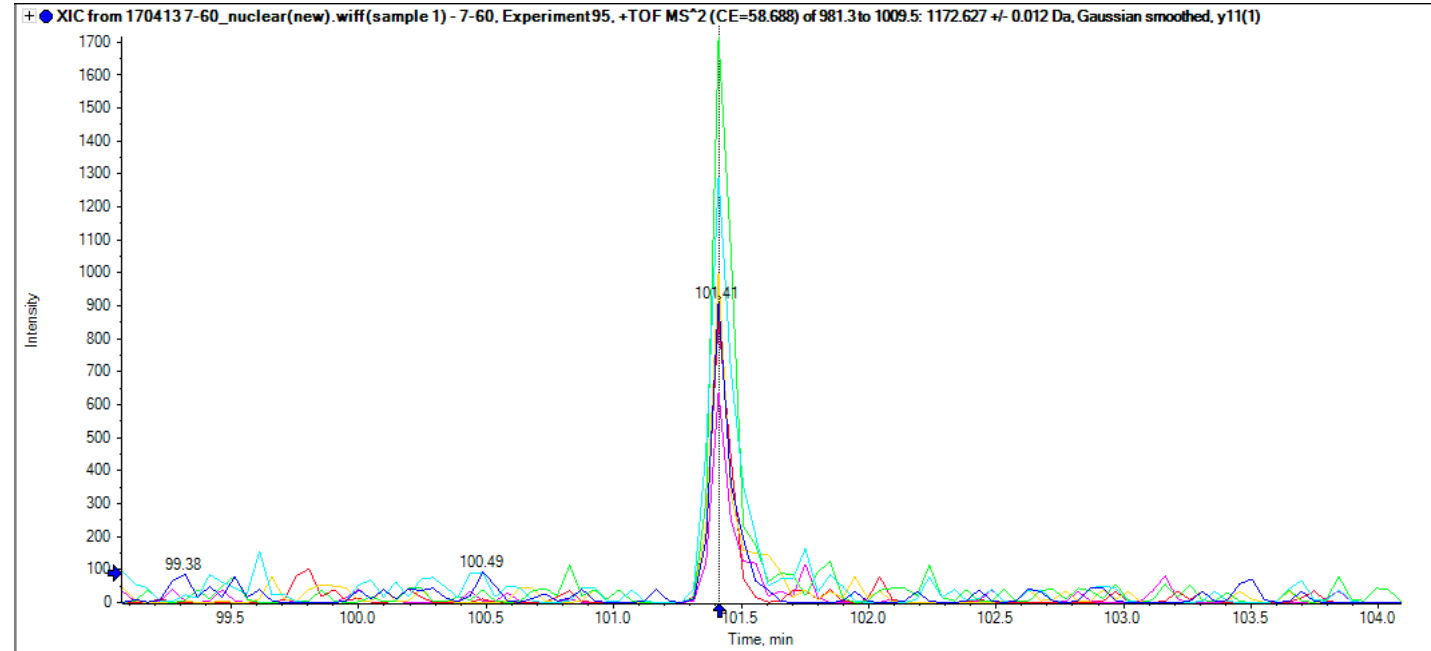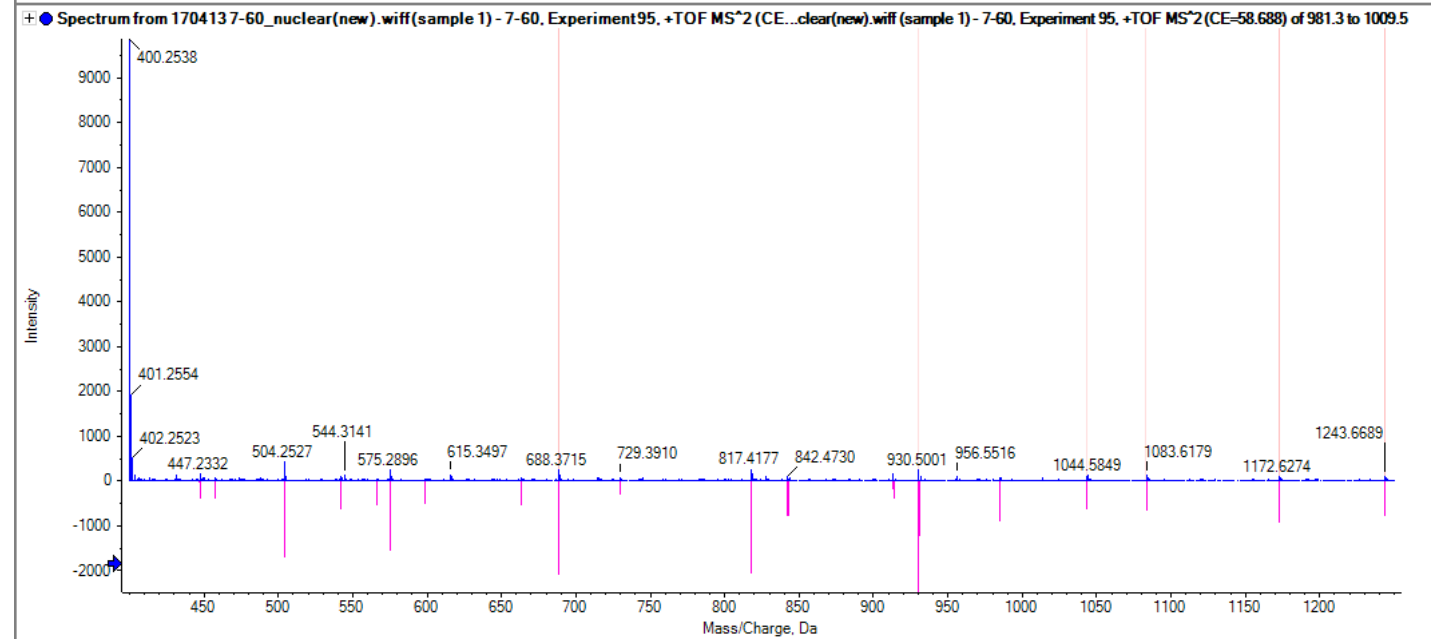

DNA (cytosine-5)-methyltransferase 1

LPLFPEPLHVFAPR

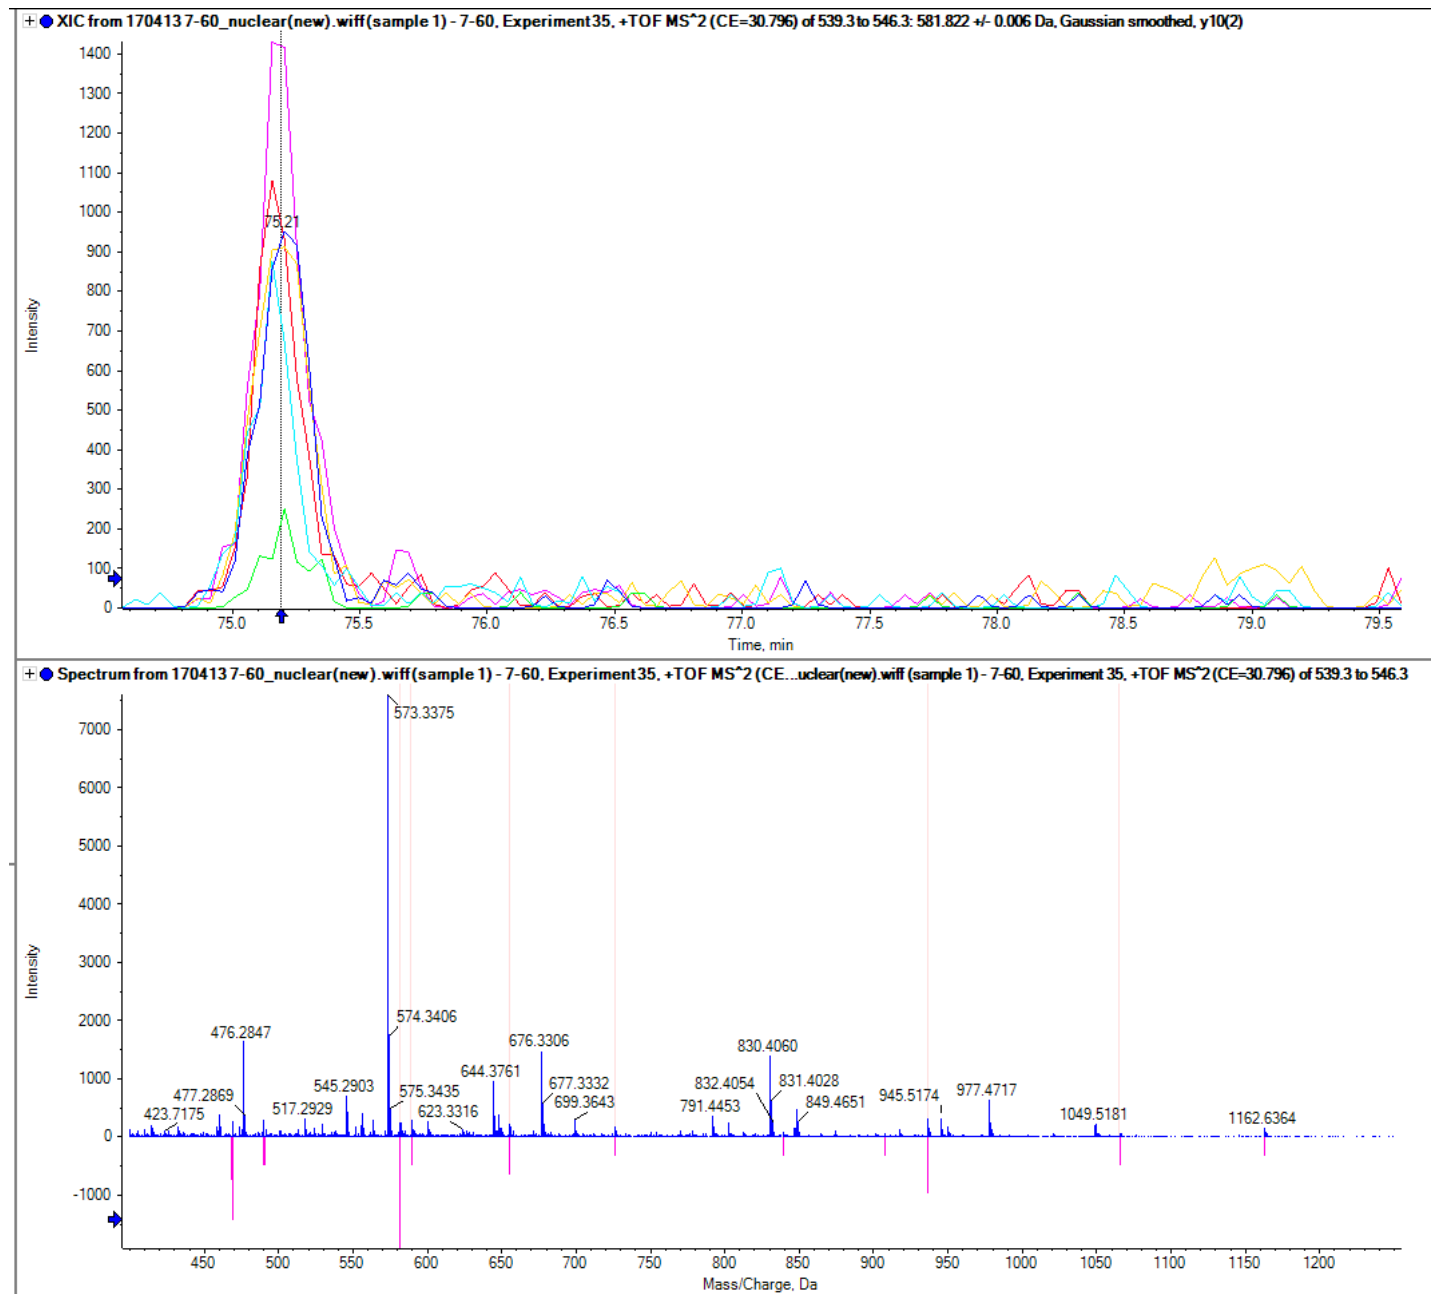

# Isoform 3 of Chemokine-like factor

LLFNPSGPYQK

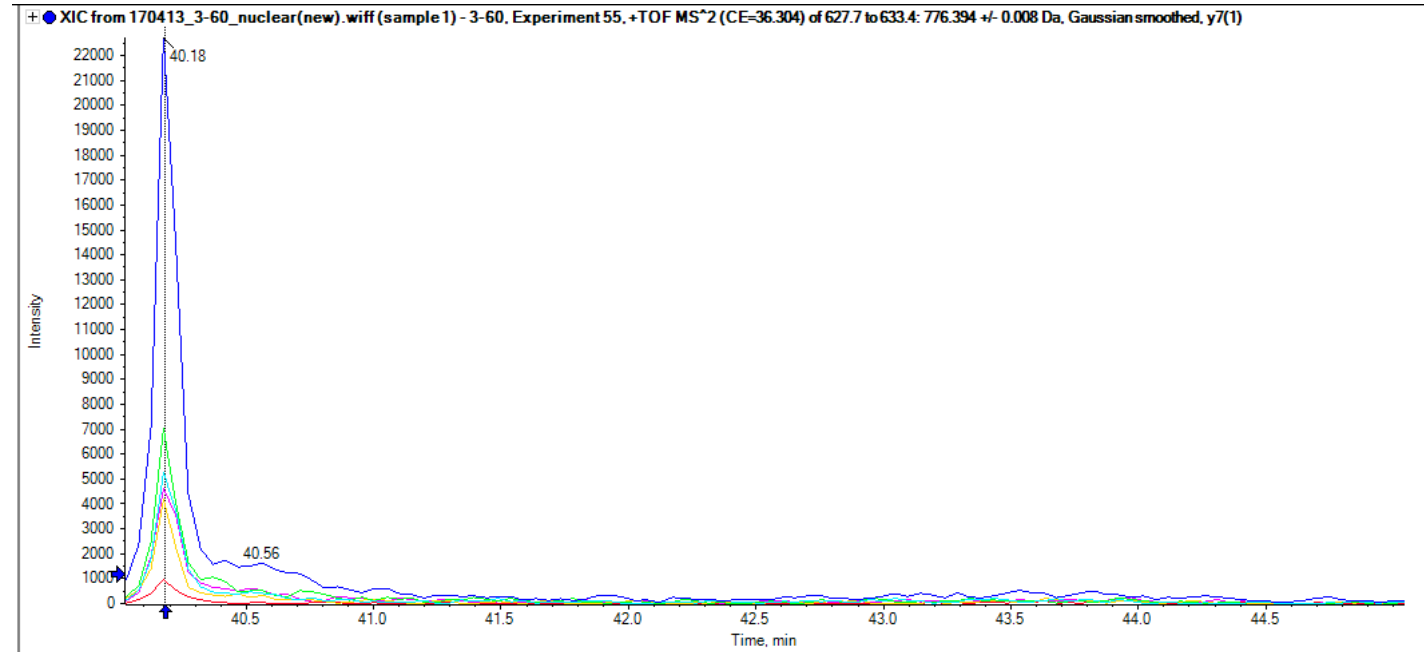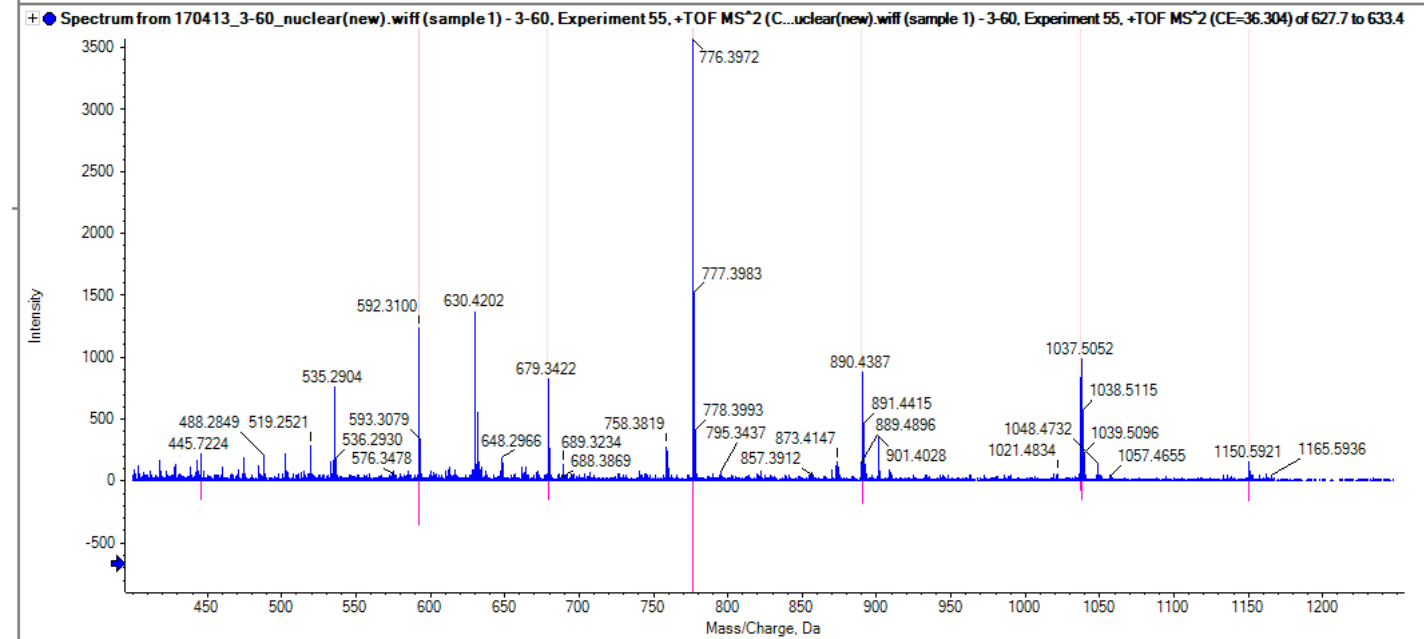

# Izumo sperm-egg fusion protein 4

MYFPGYFPNELR

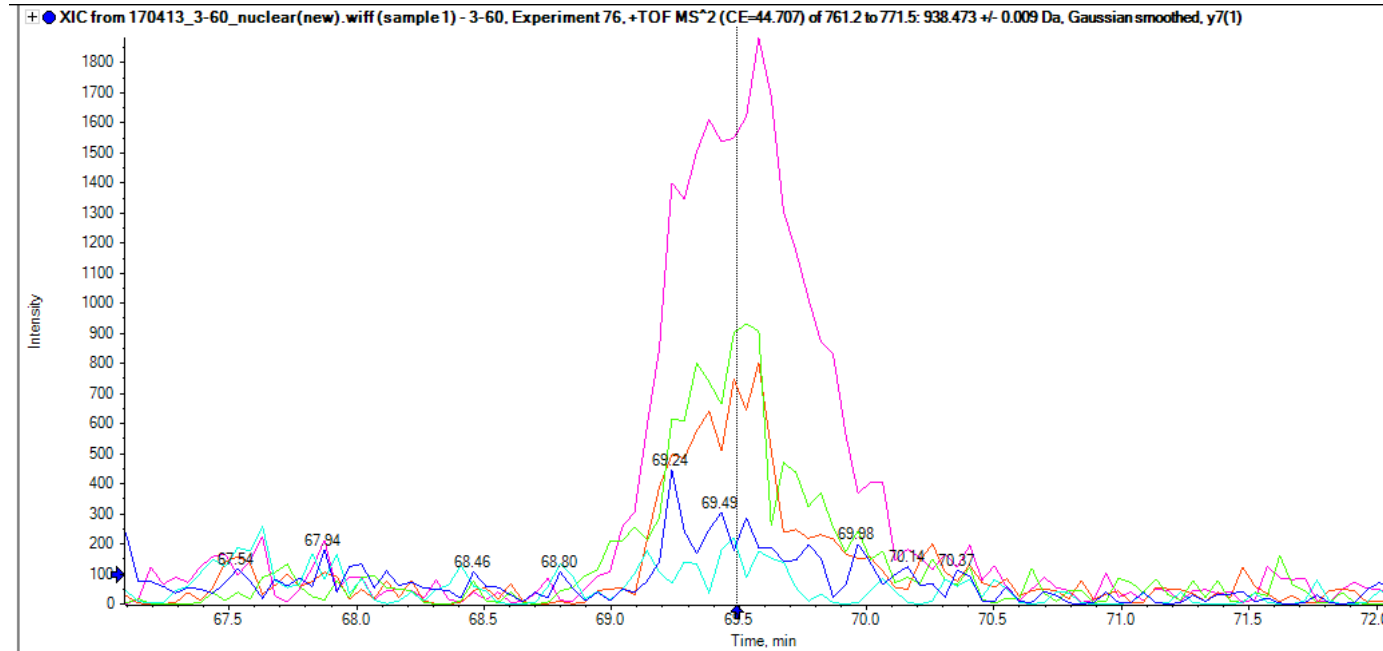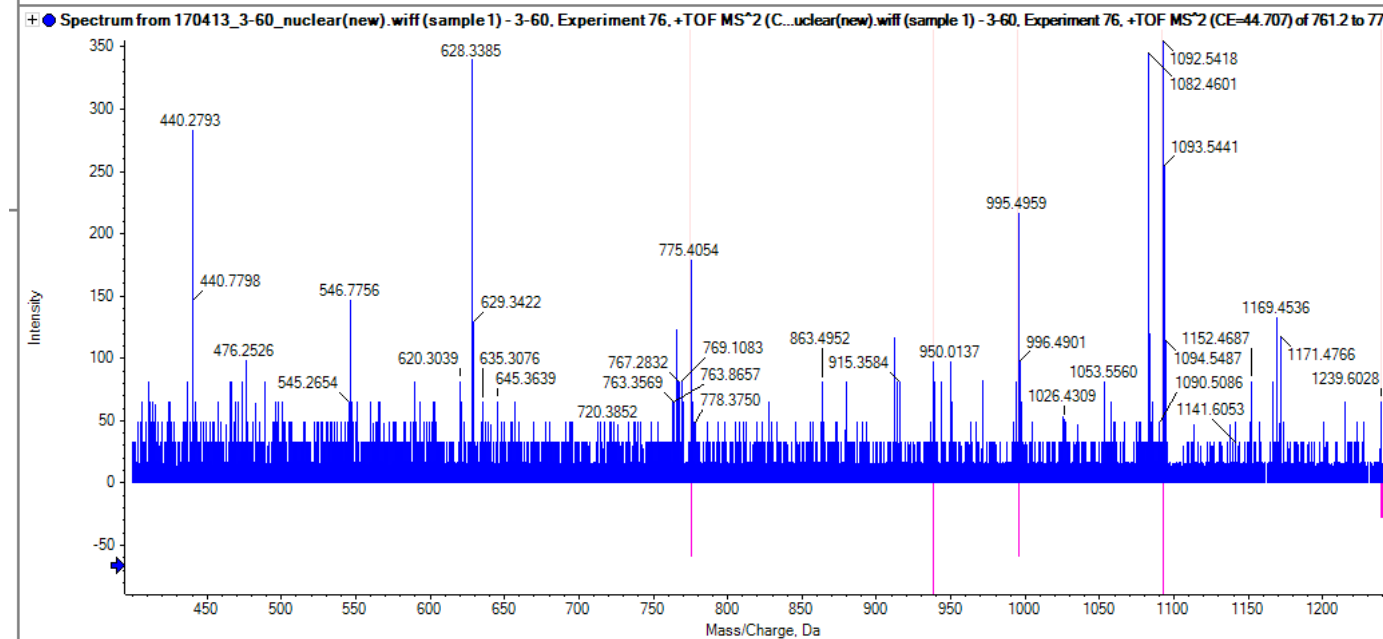

Uncharacterized protein C6orf10

TASQLAAPIIISQR

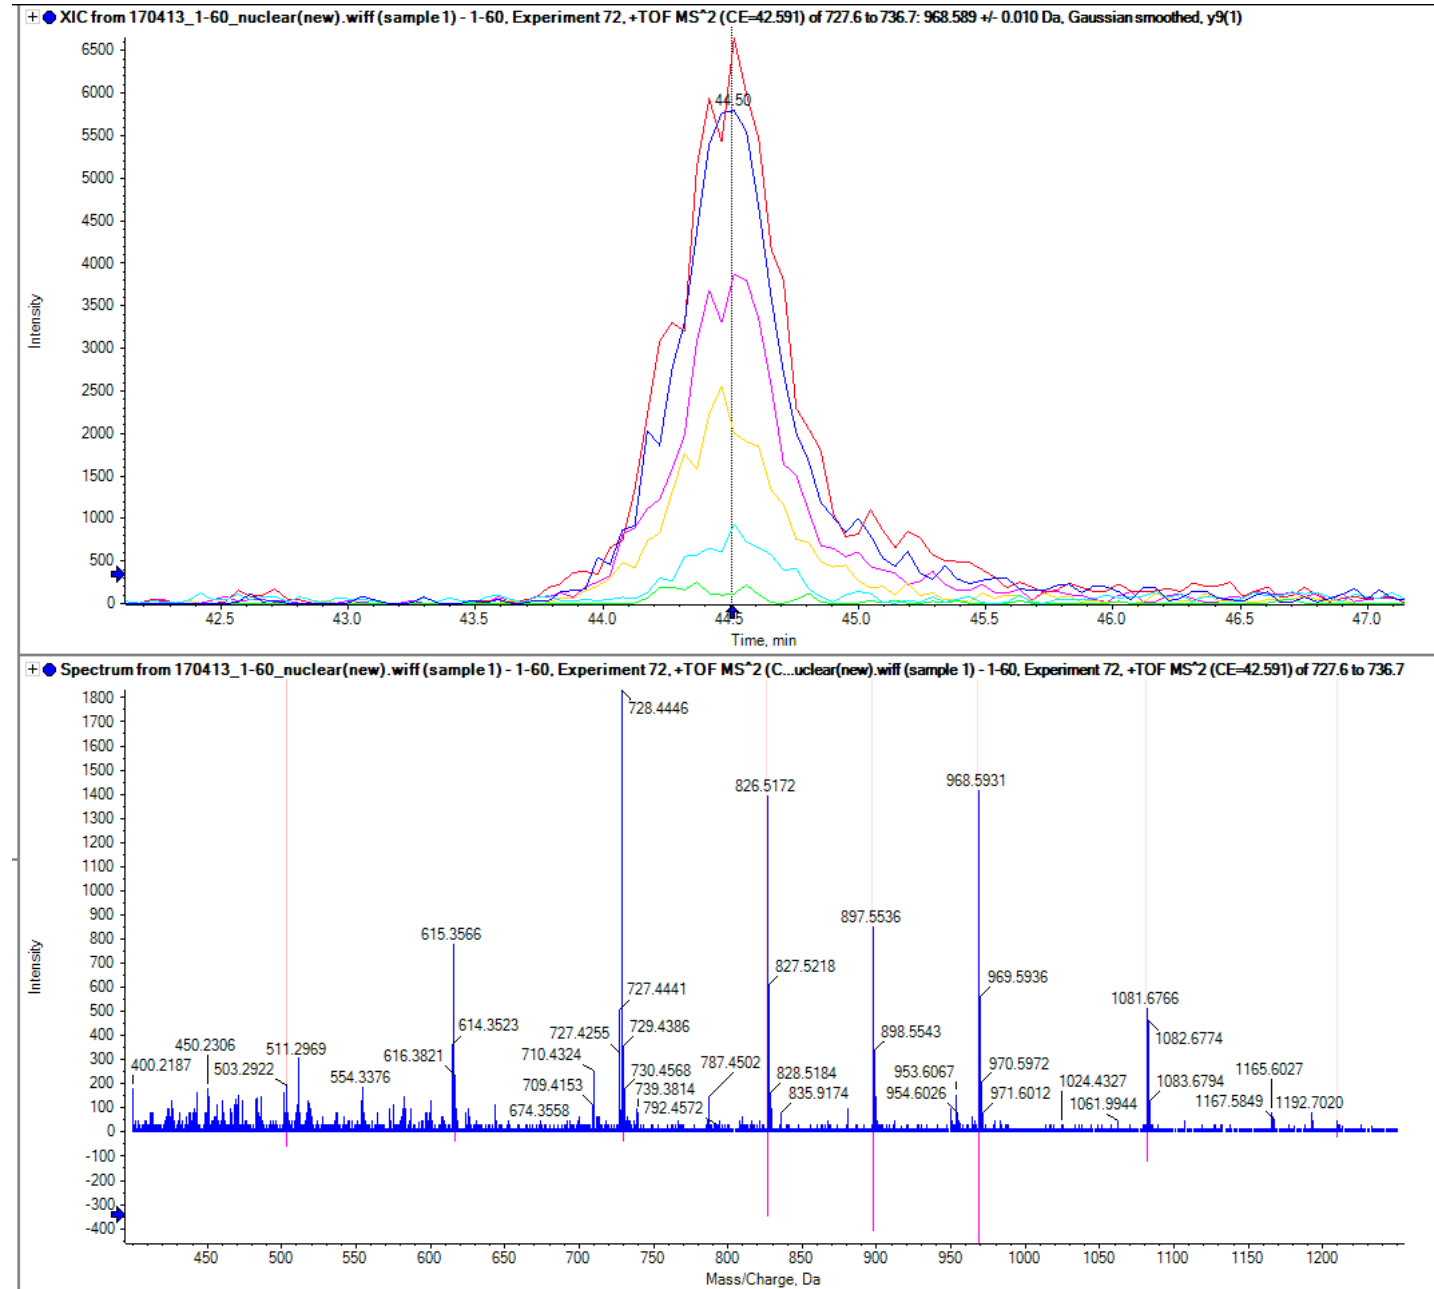

Isoform 2 of Barrier-to-  
autointegration factor-like  
protein

AYILLGQFLLMHK

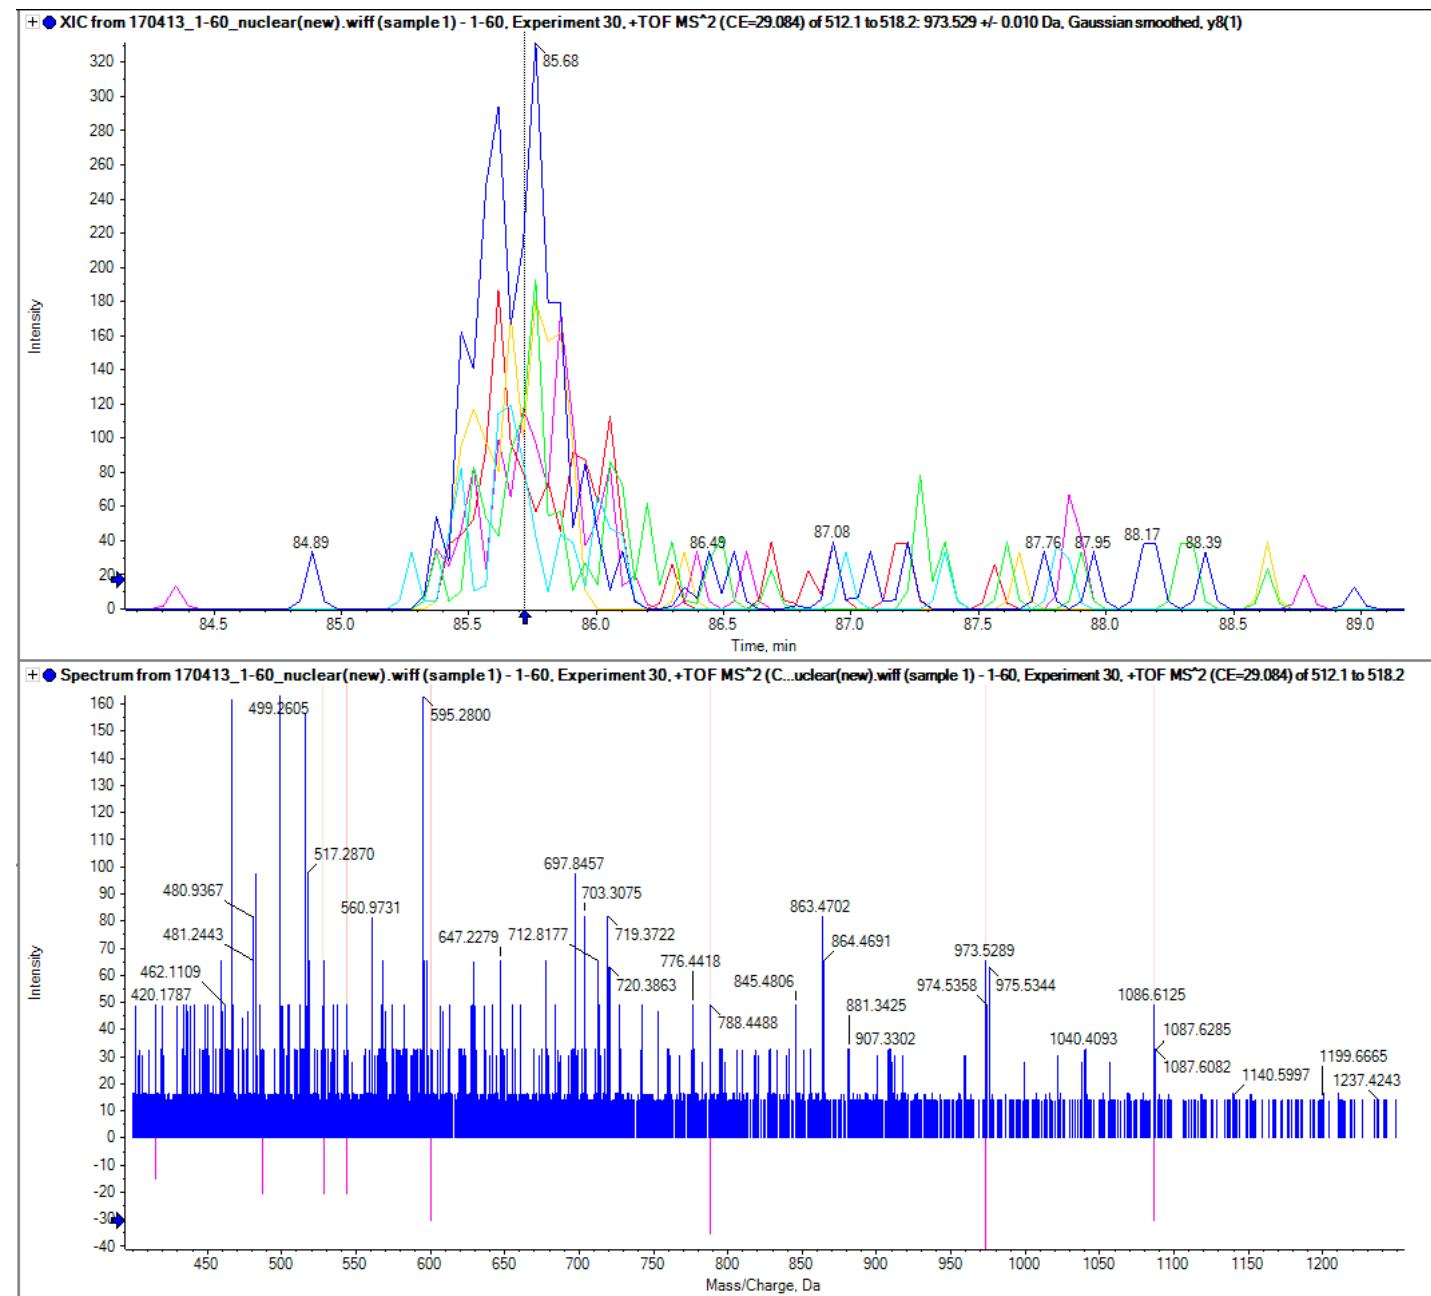

# BAG family molecular chaperone regulator 5

LAQNILSYLDLK

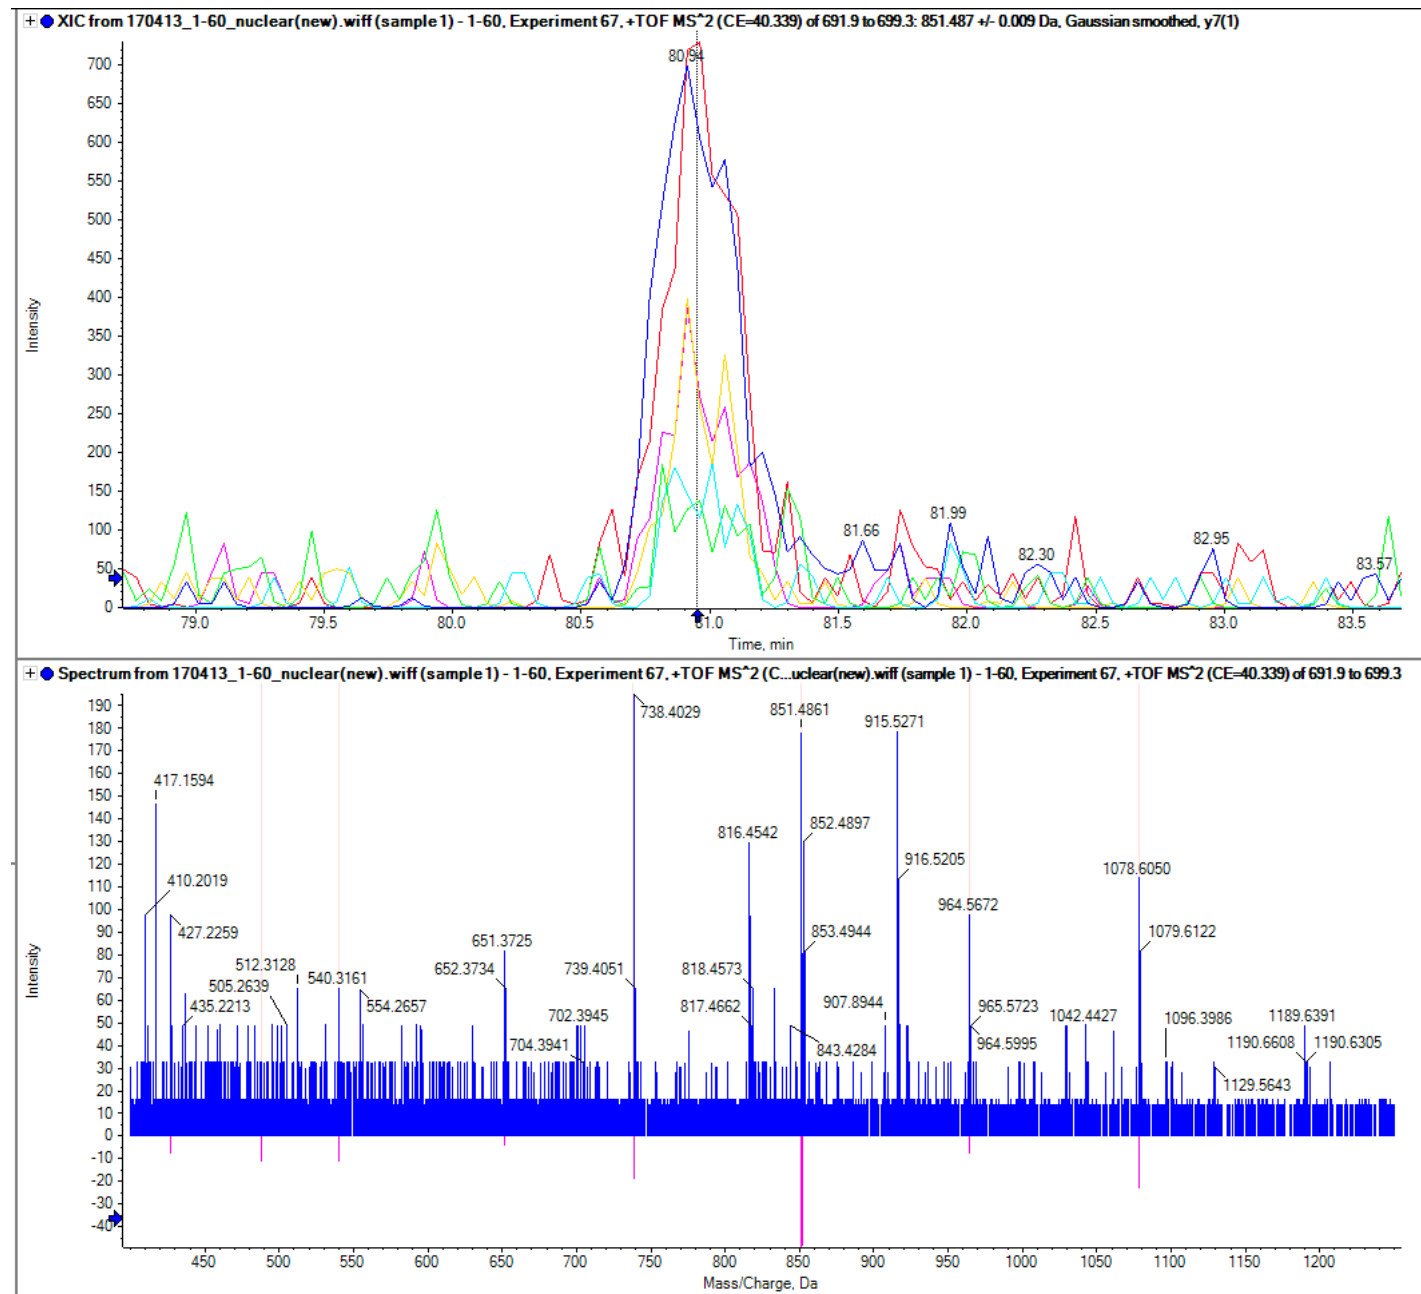



sp|Q6UWU2|GLB1L\_HUMAN

ILLFTTDGPEGLK

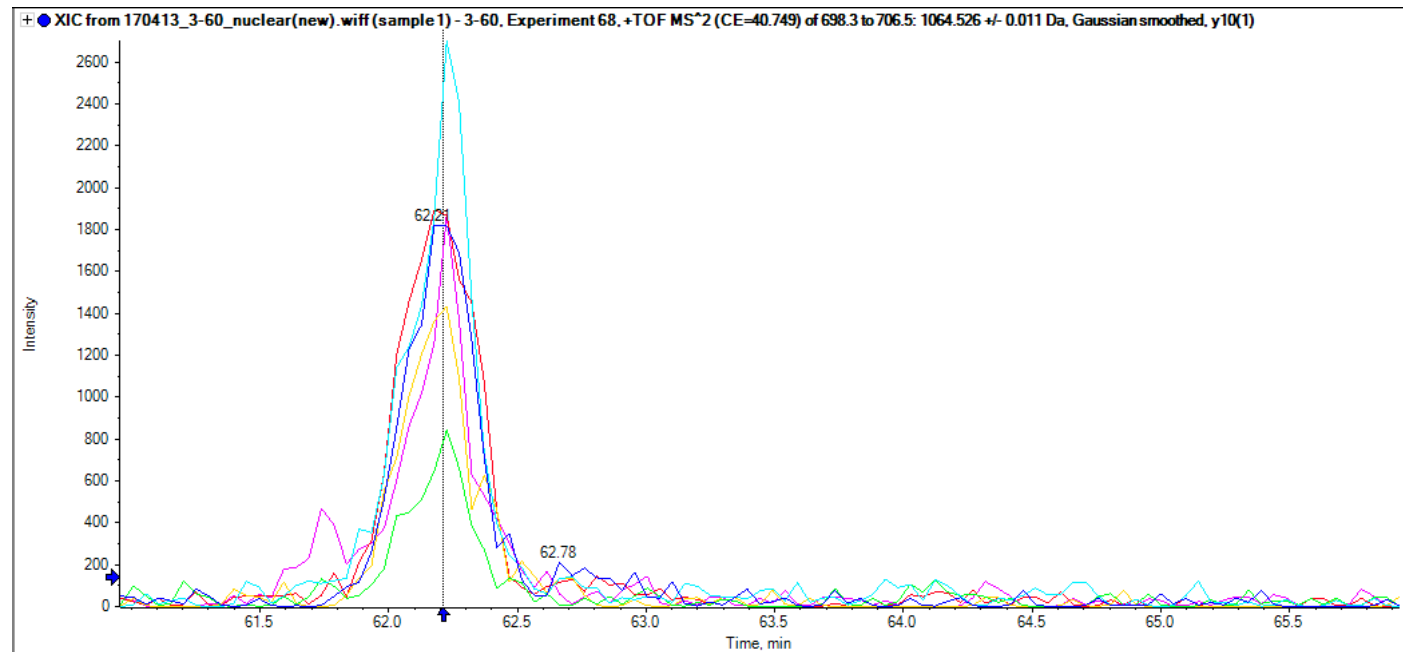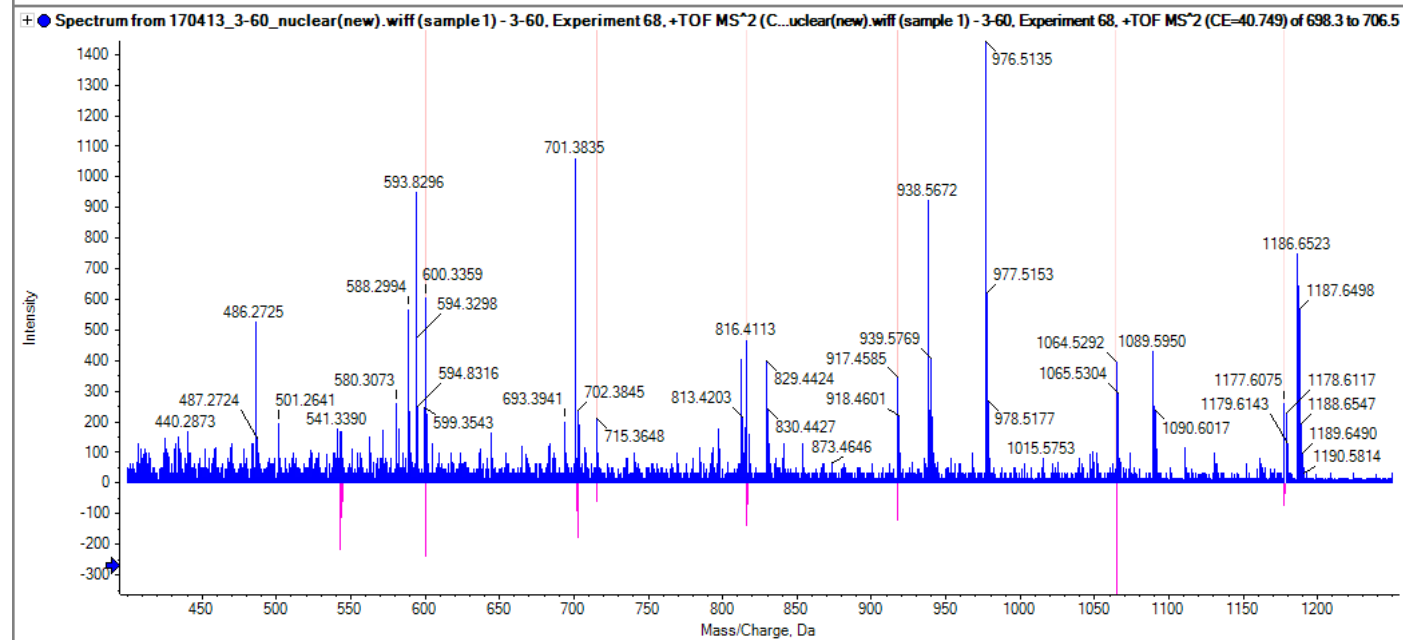

sp|P31040|SDHA\_HUMAN

LGANSLLDLVVFGFR

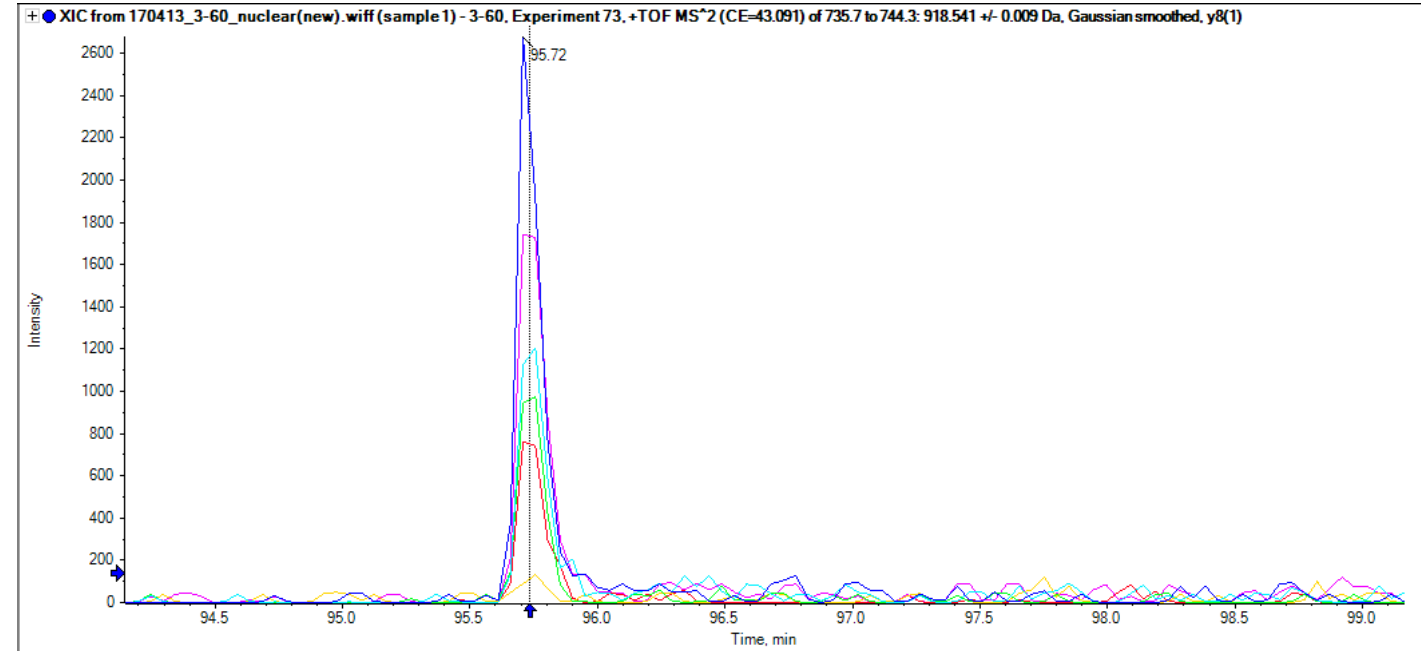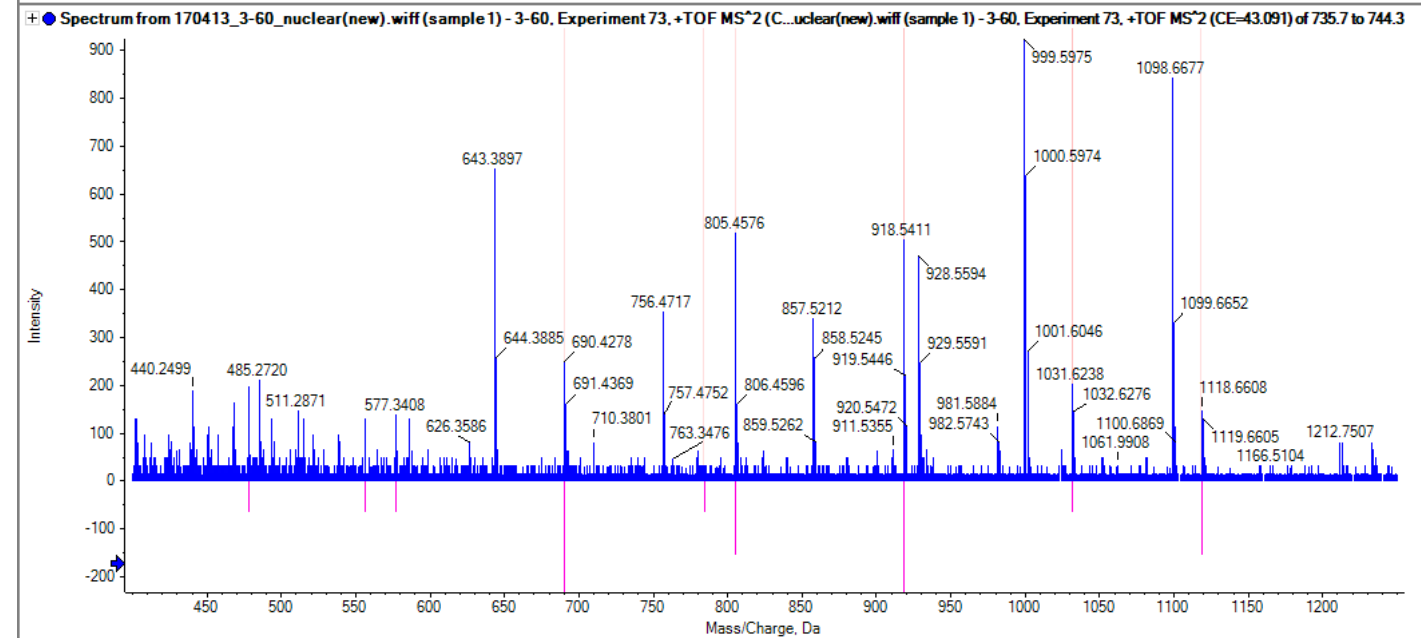

sp|P48637|GSHB\_HUMAN

EGIAQTVFLGLNR

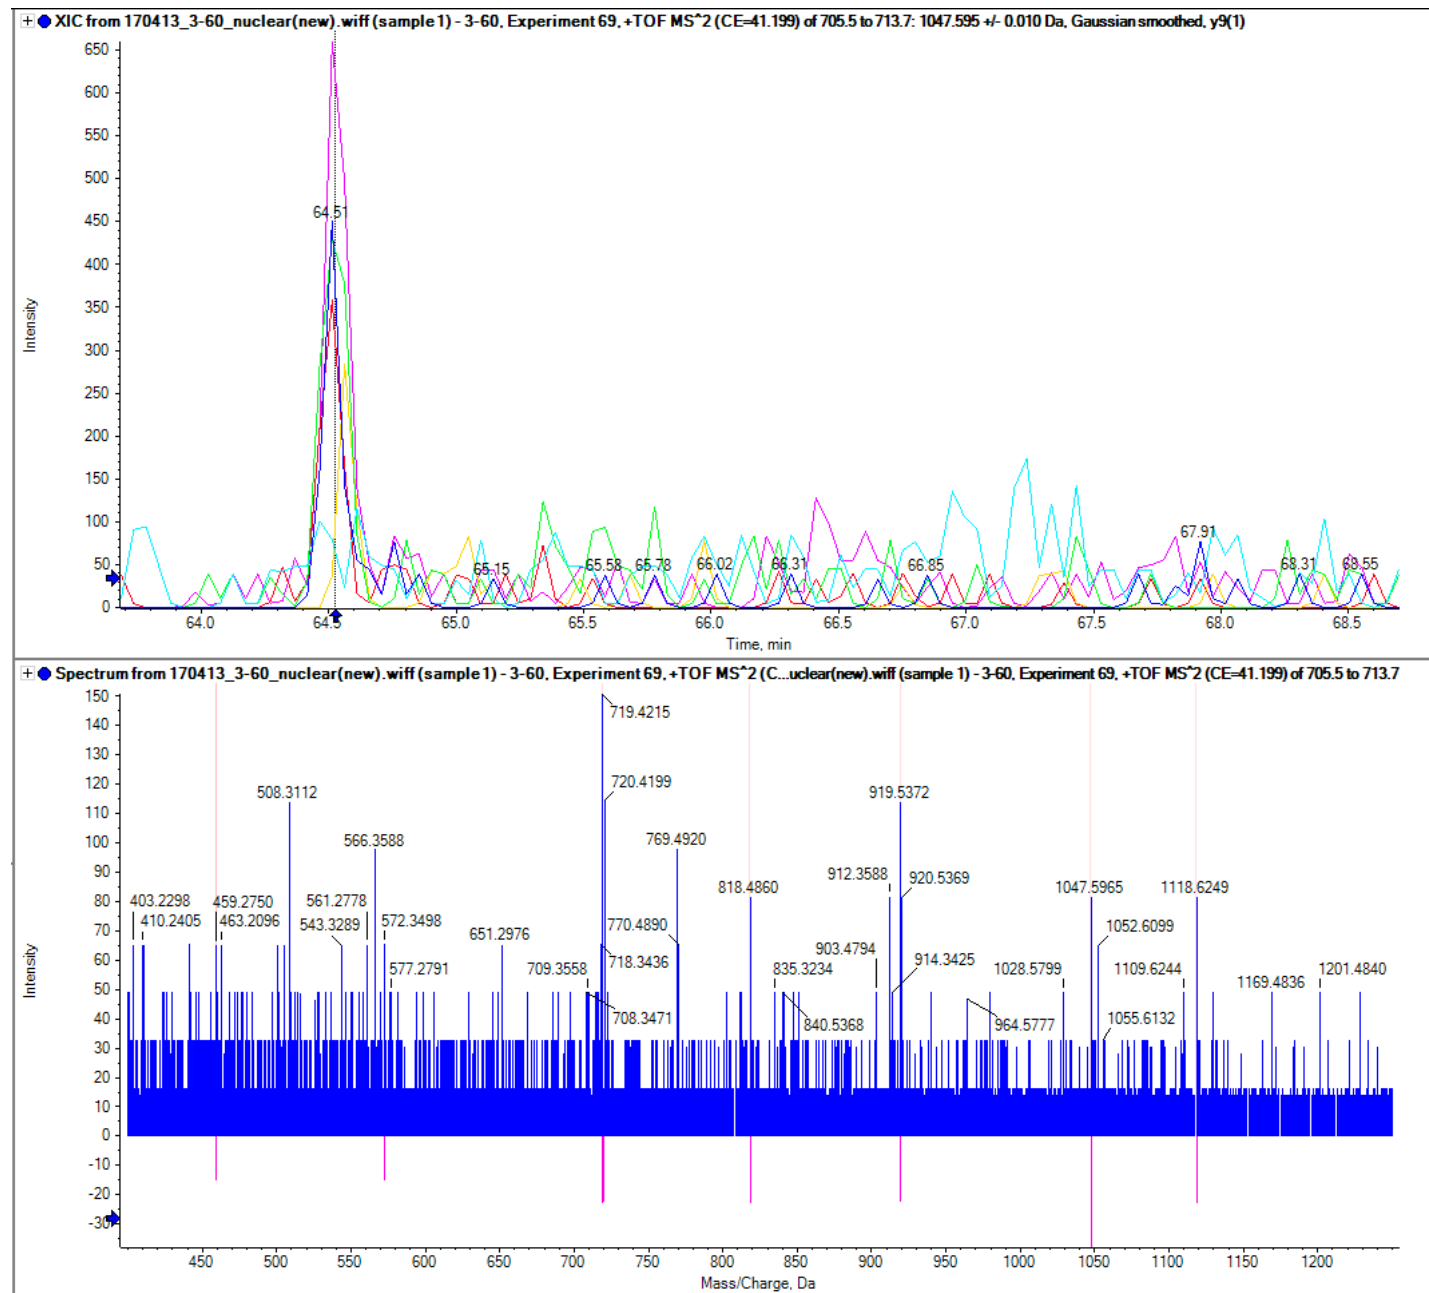

sp|P09211|GSTP1\_HUMAN

PPYTVVYFPVR

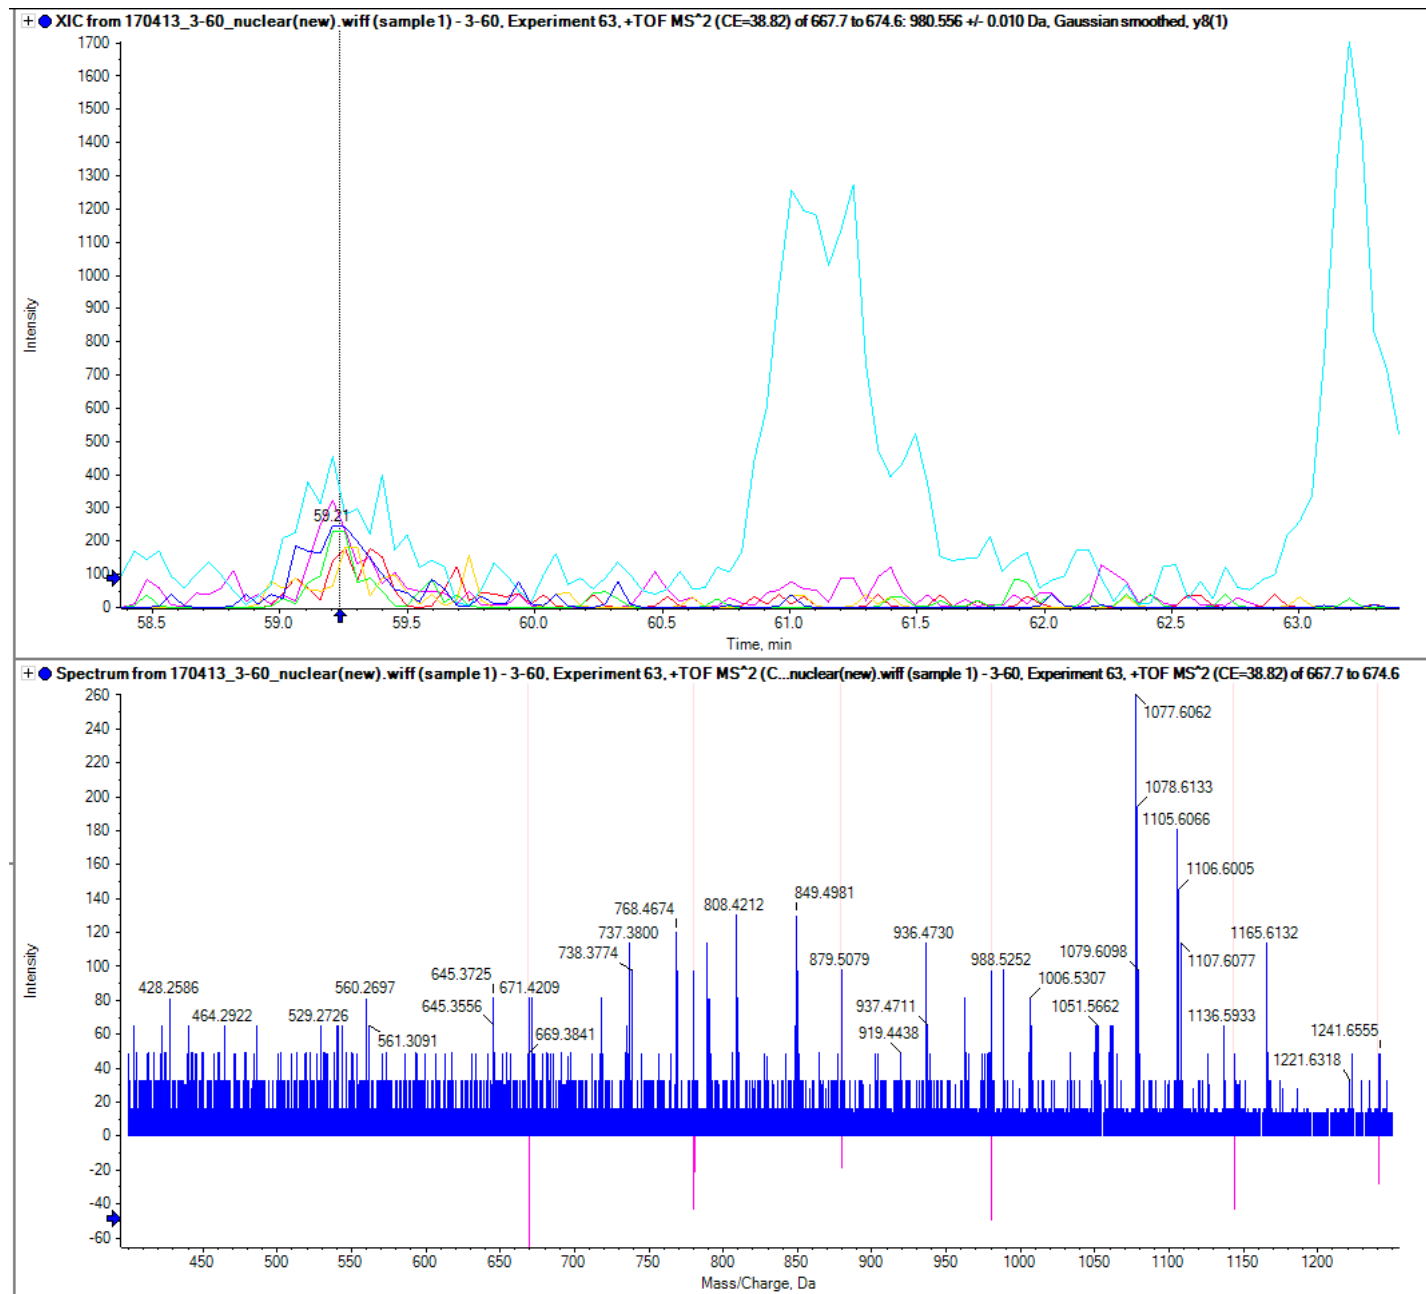

sp|POC1H6|H2BFM\_HUMAN

QVHQGLSLSQEAVSVMDSMIHDILDR

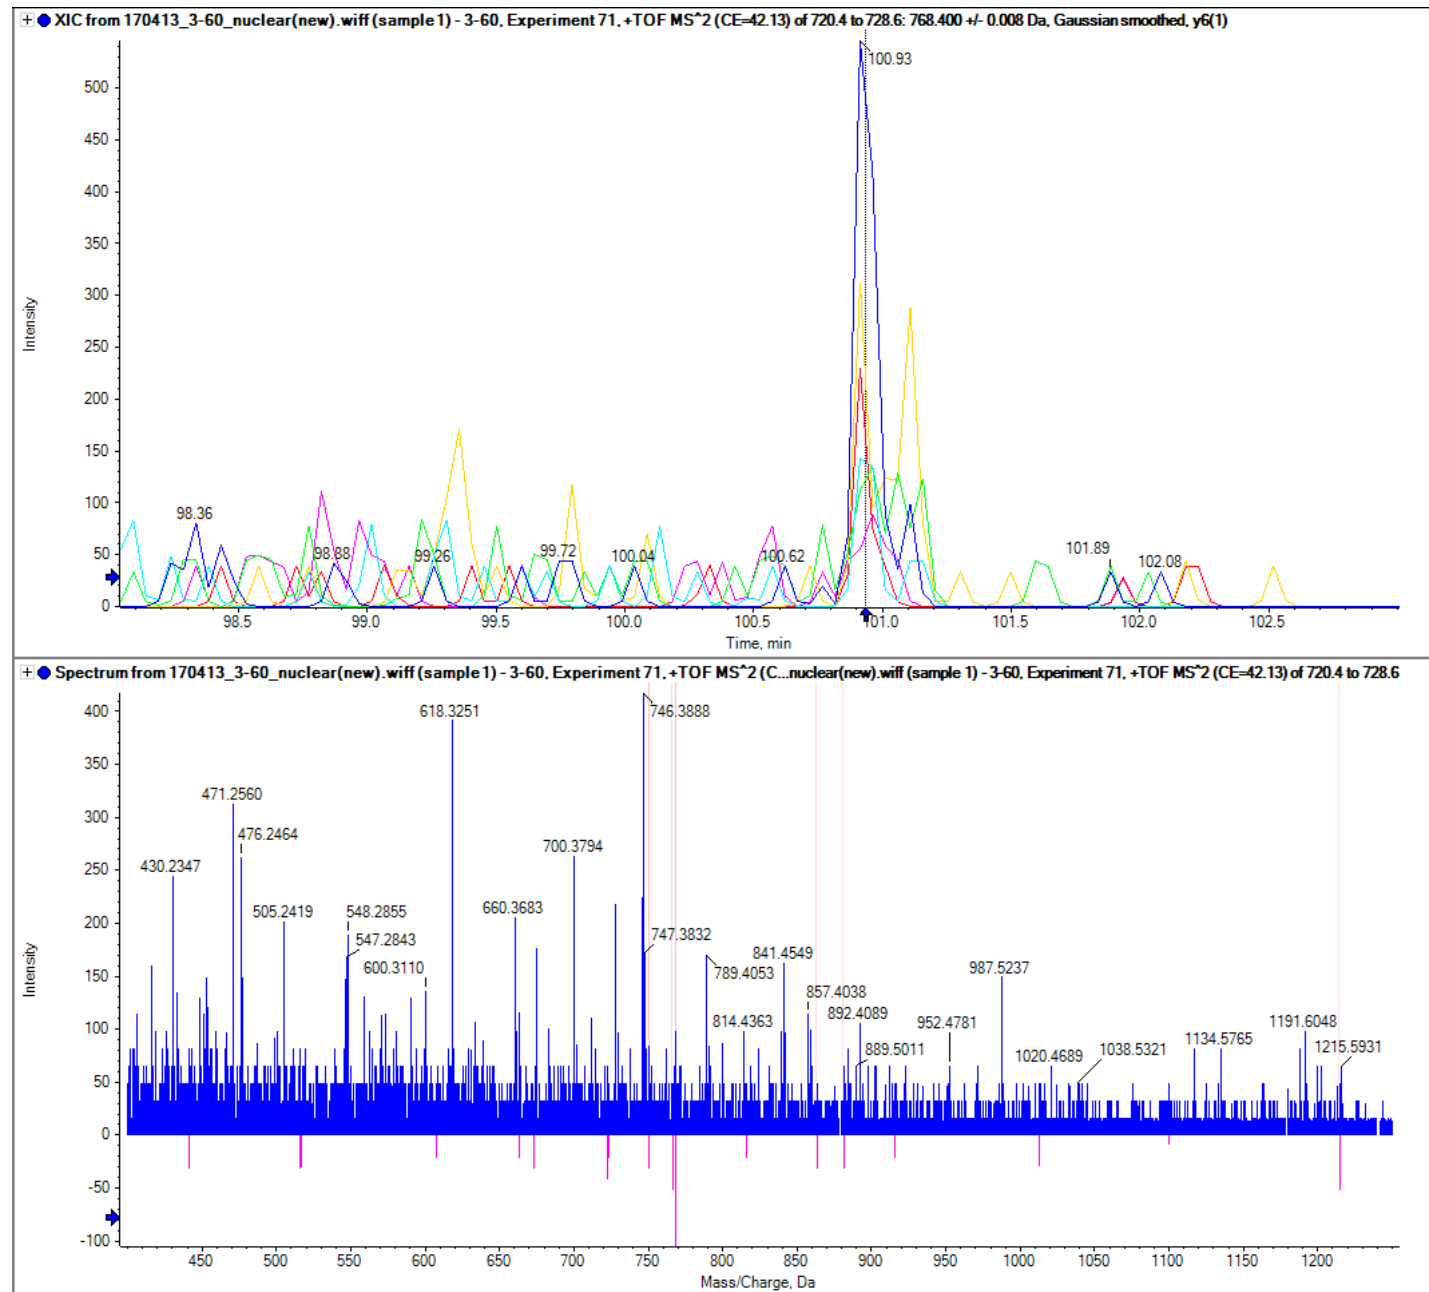

sp|P22735|TGM1\_HUMAN

GSGVNAAGDGTR

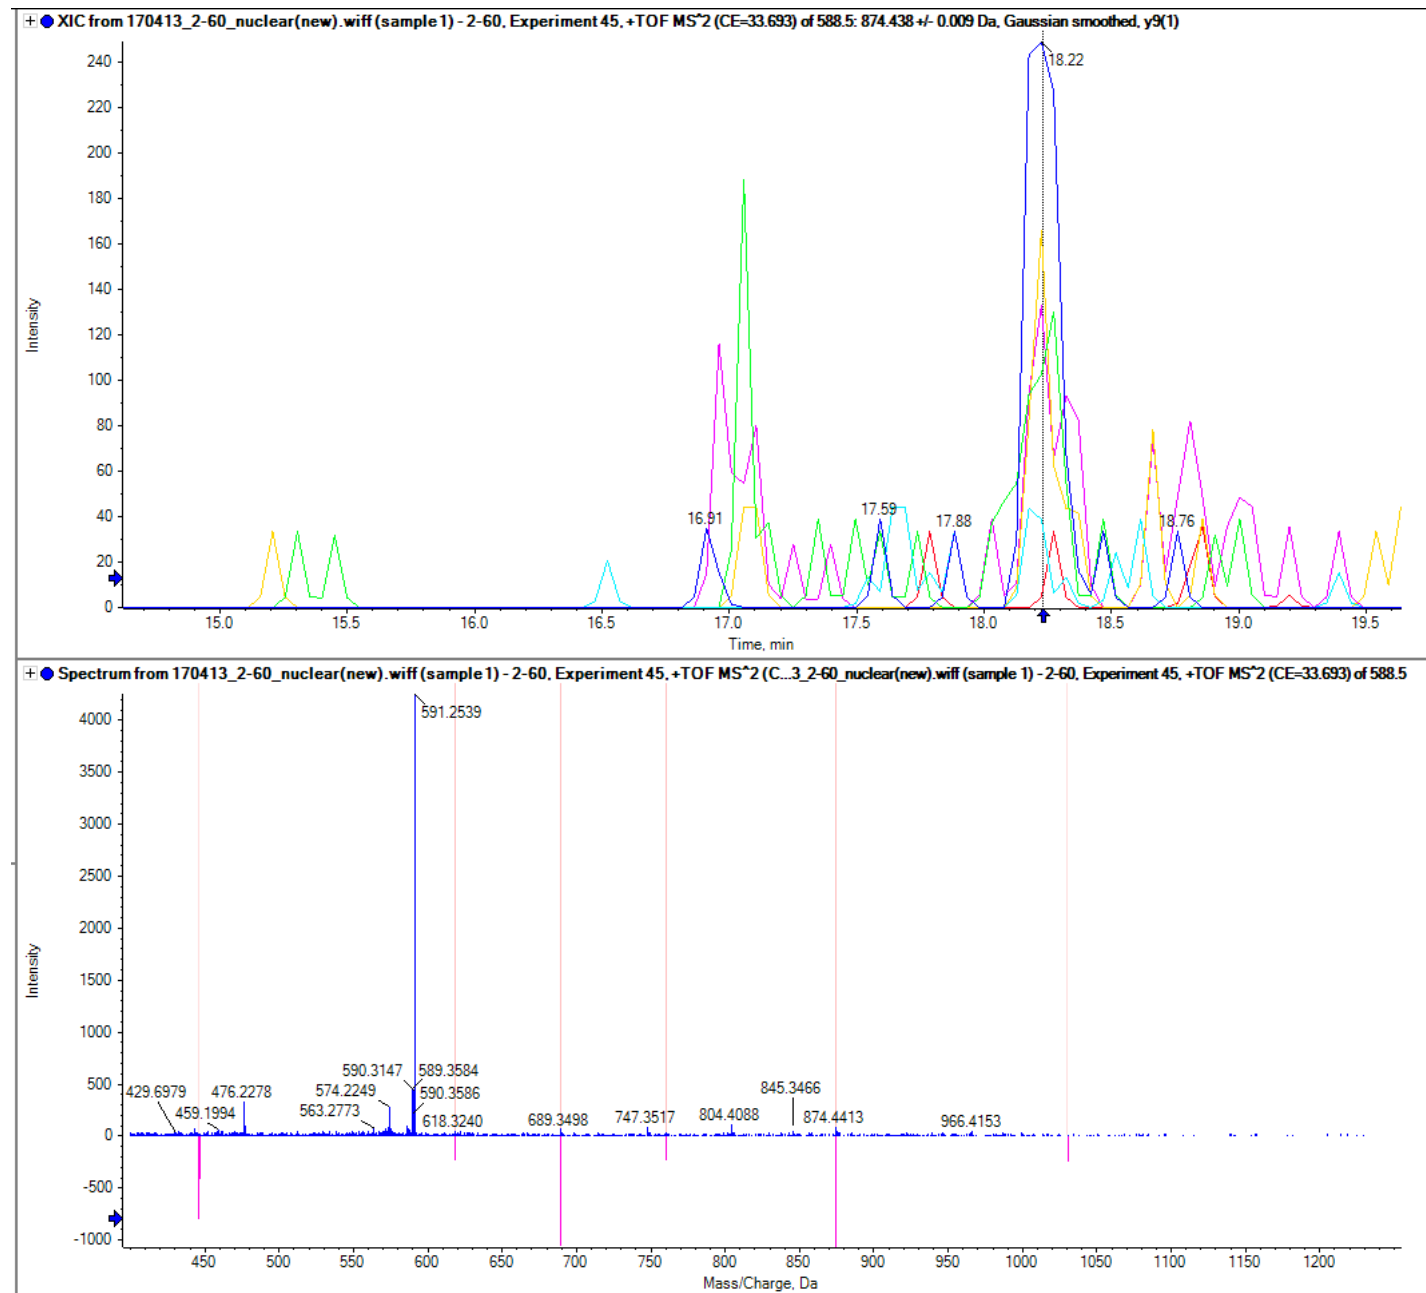

sp|Q8WW34|TM239\_HUMAN

VETDTIGAGEGPQQAVPWSAWVTR

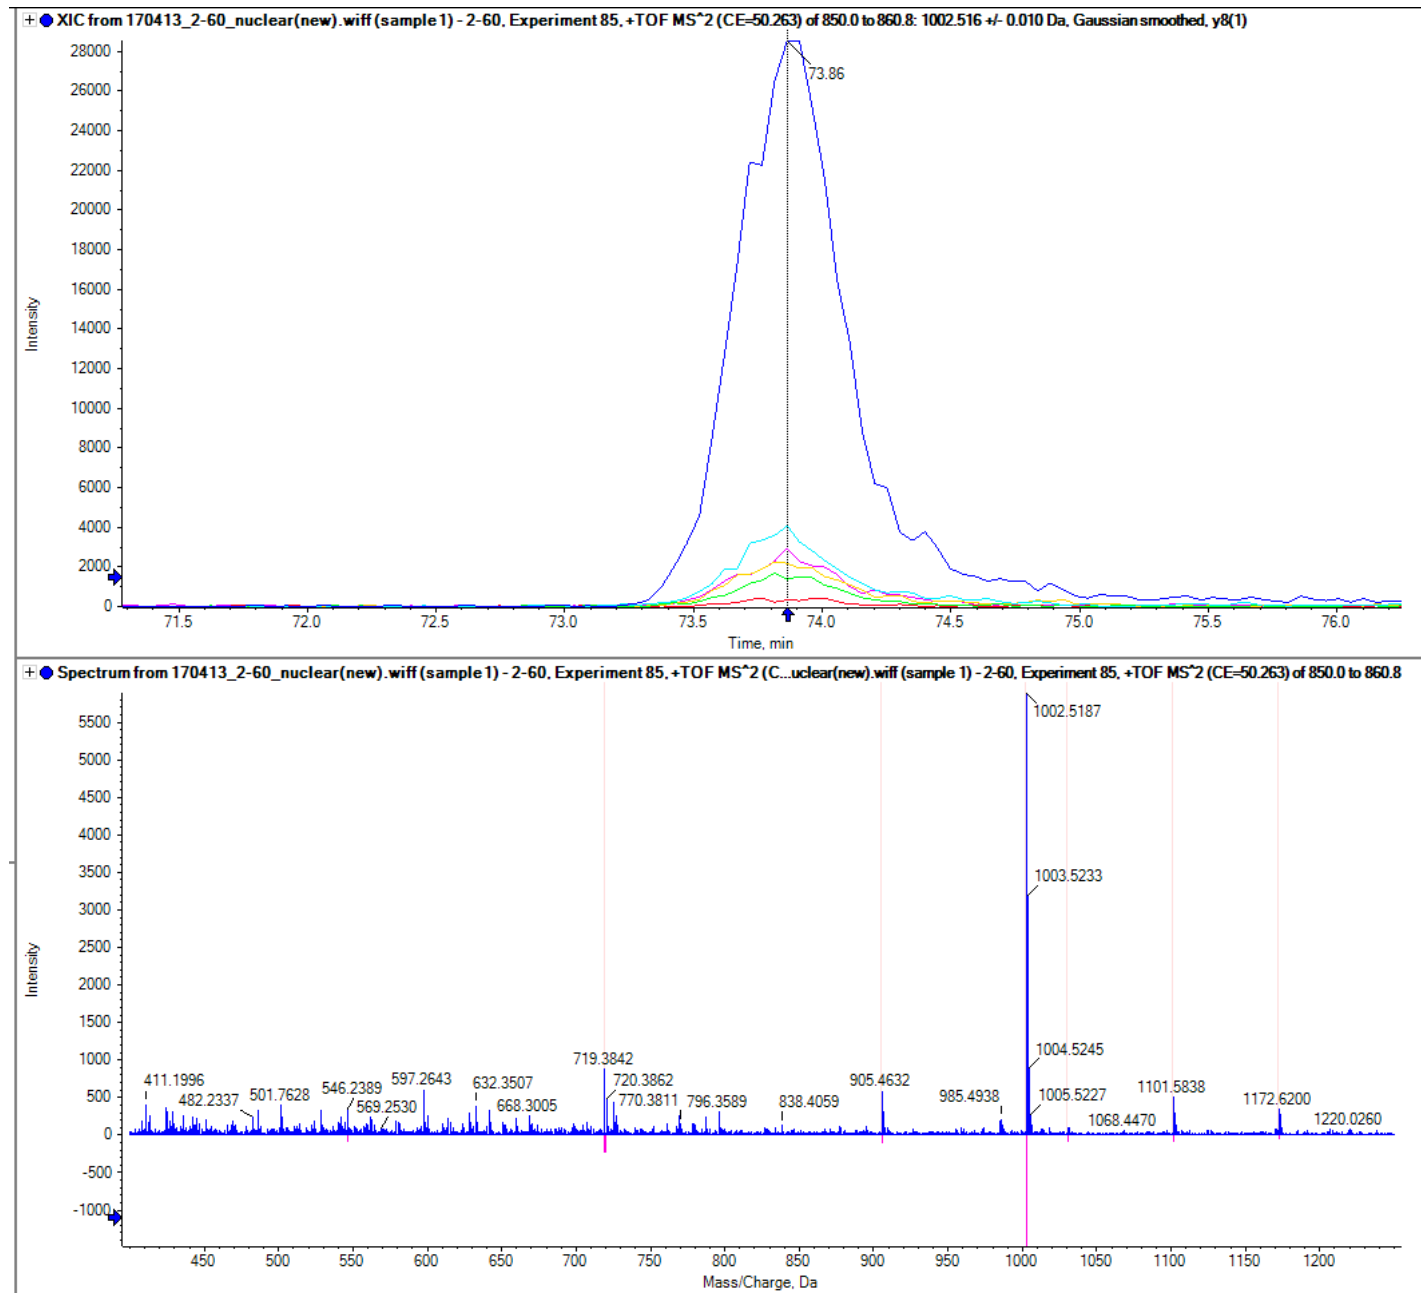

sp|P31937|3HIDH\_HUMAN

IITMLPTSINAIEAYSGANGILK

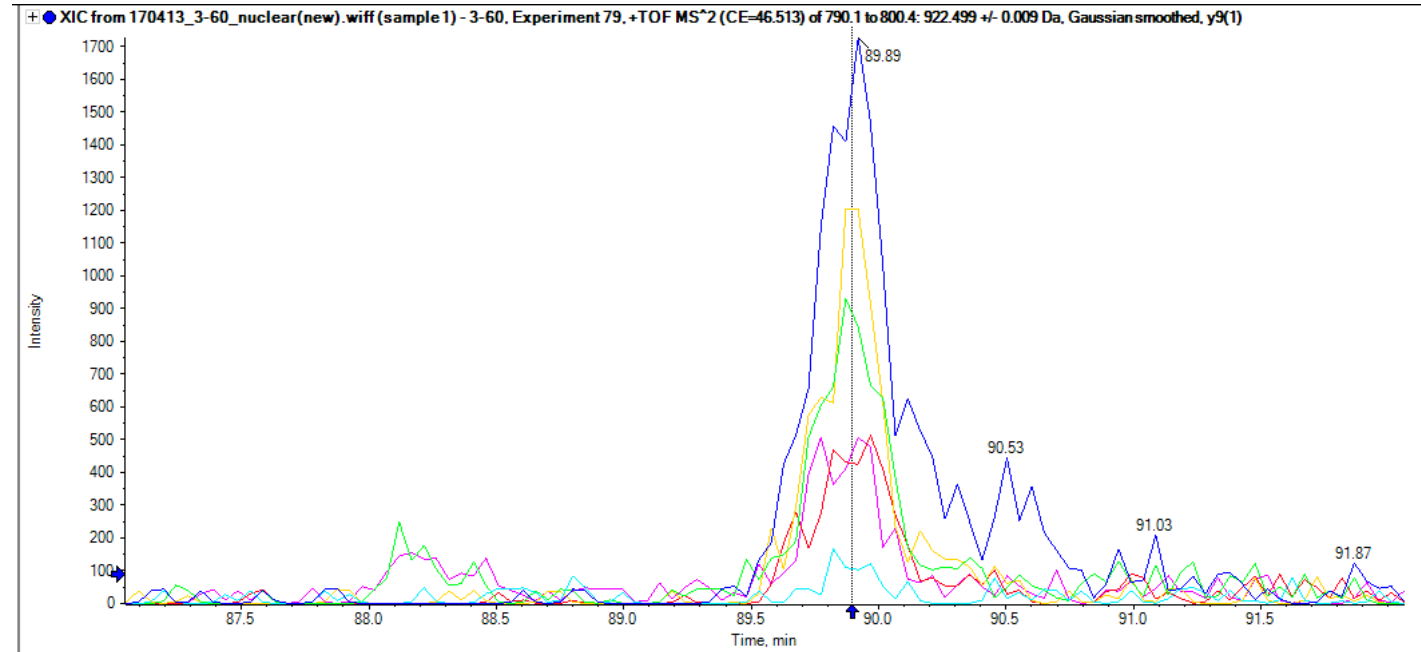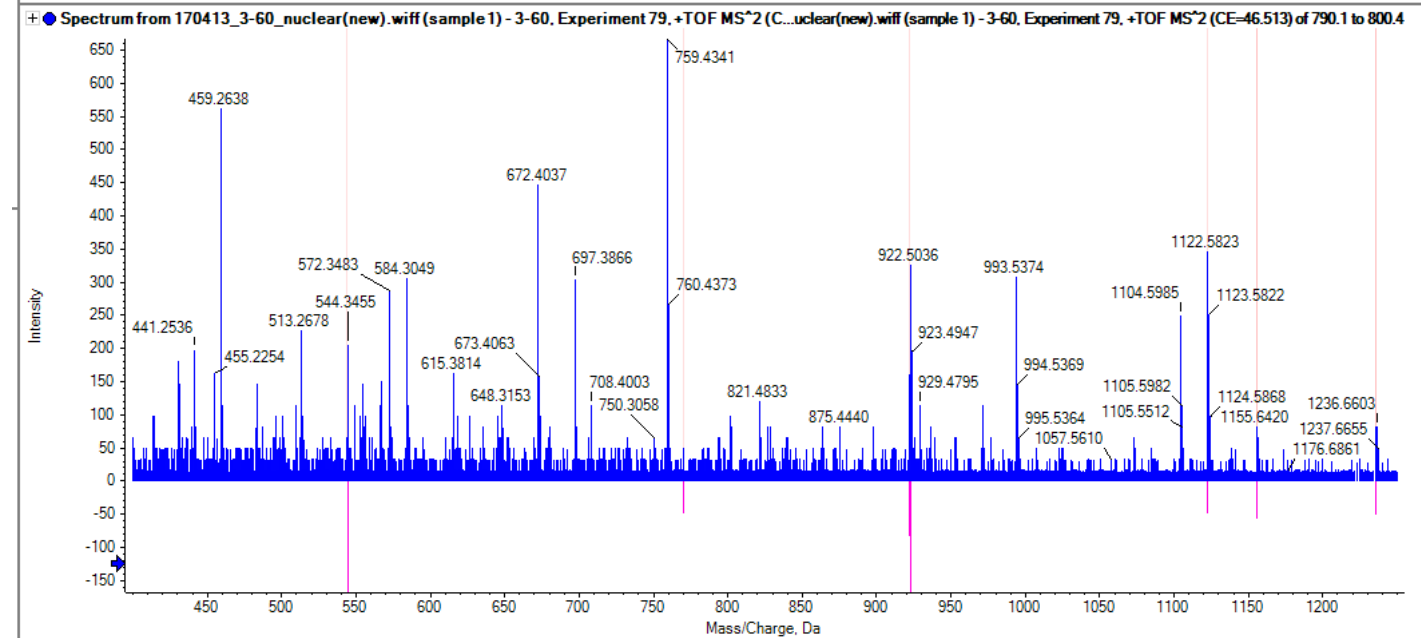



sp|Q8N5M9|JAGN1\_HUMAN  
LLDSWFTSTQEK

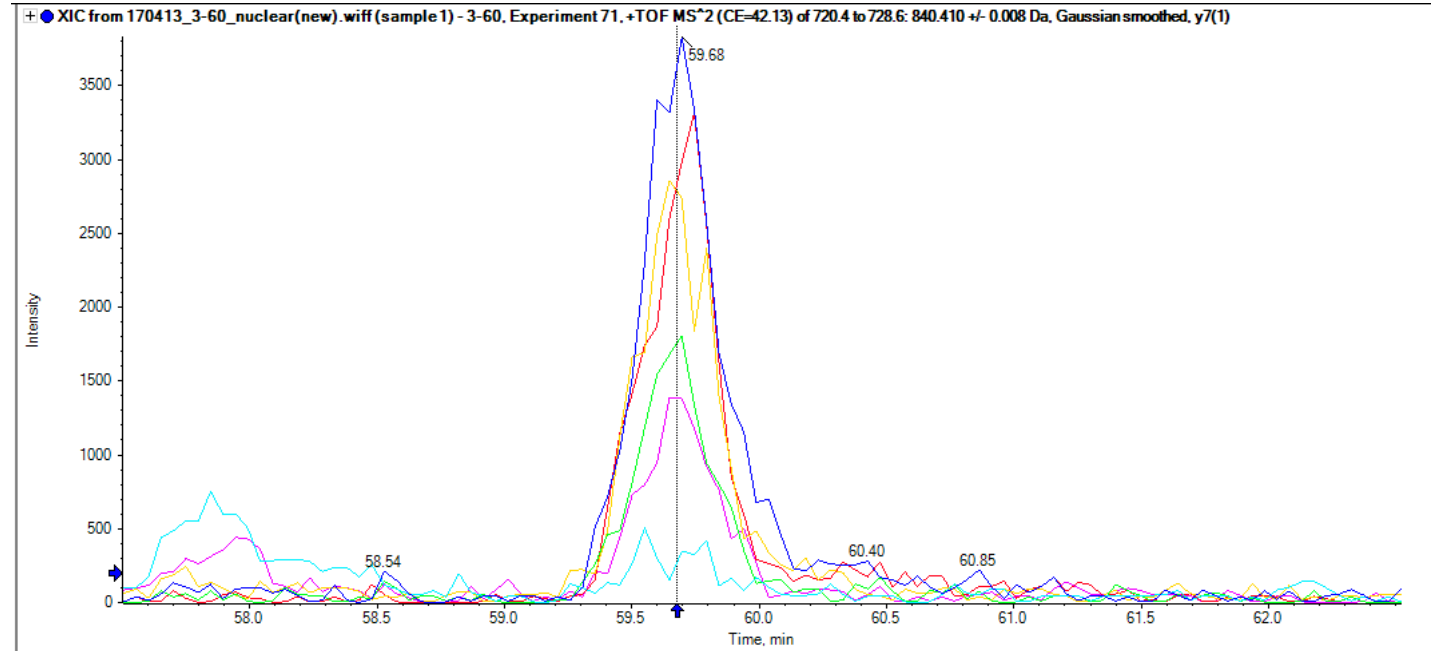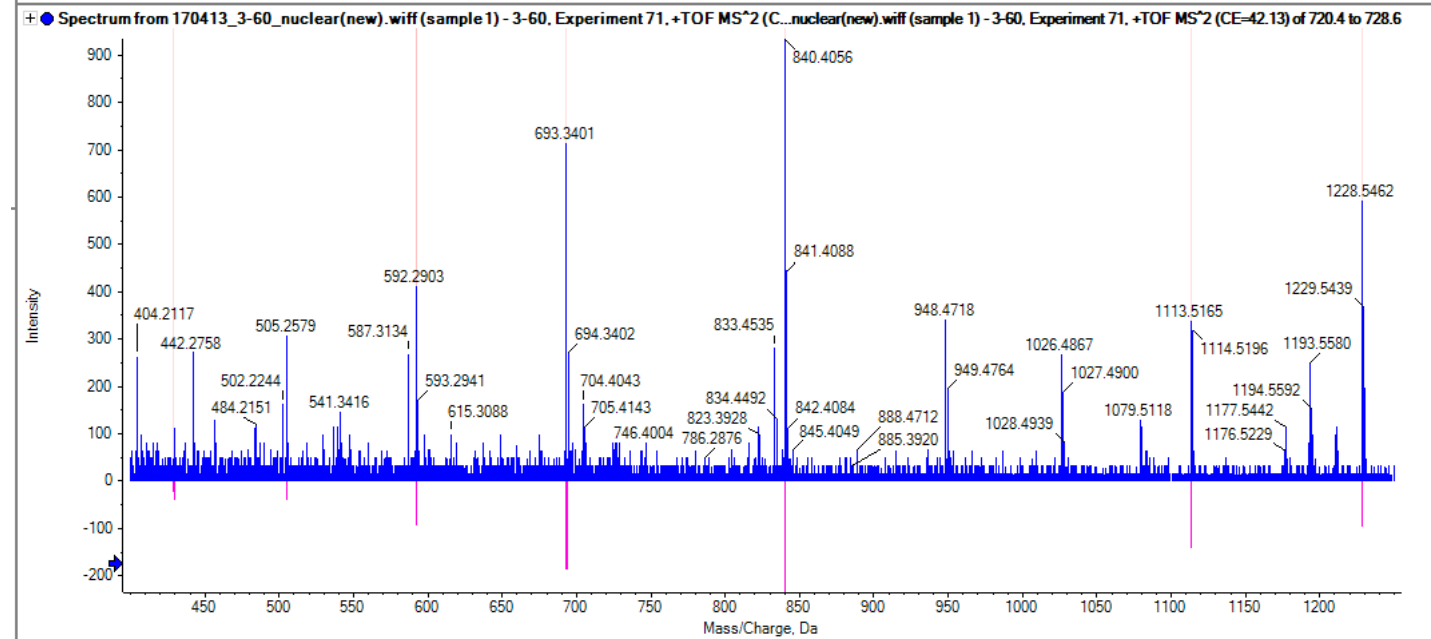

sp|Q6EEV6|SUMO4\_HUMAN

VAGQDGSVVQFK

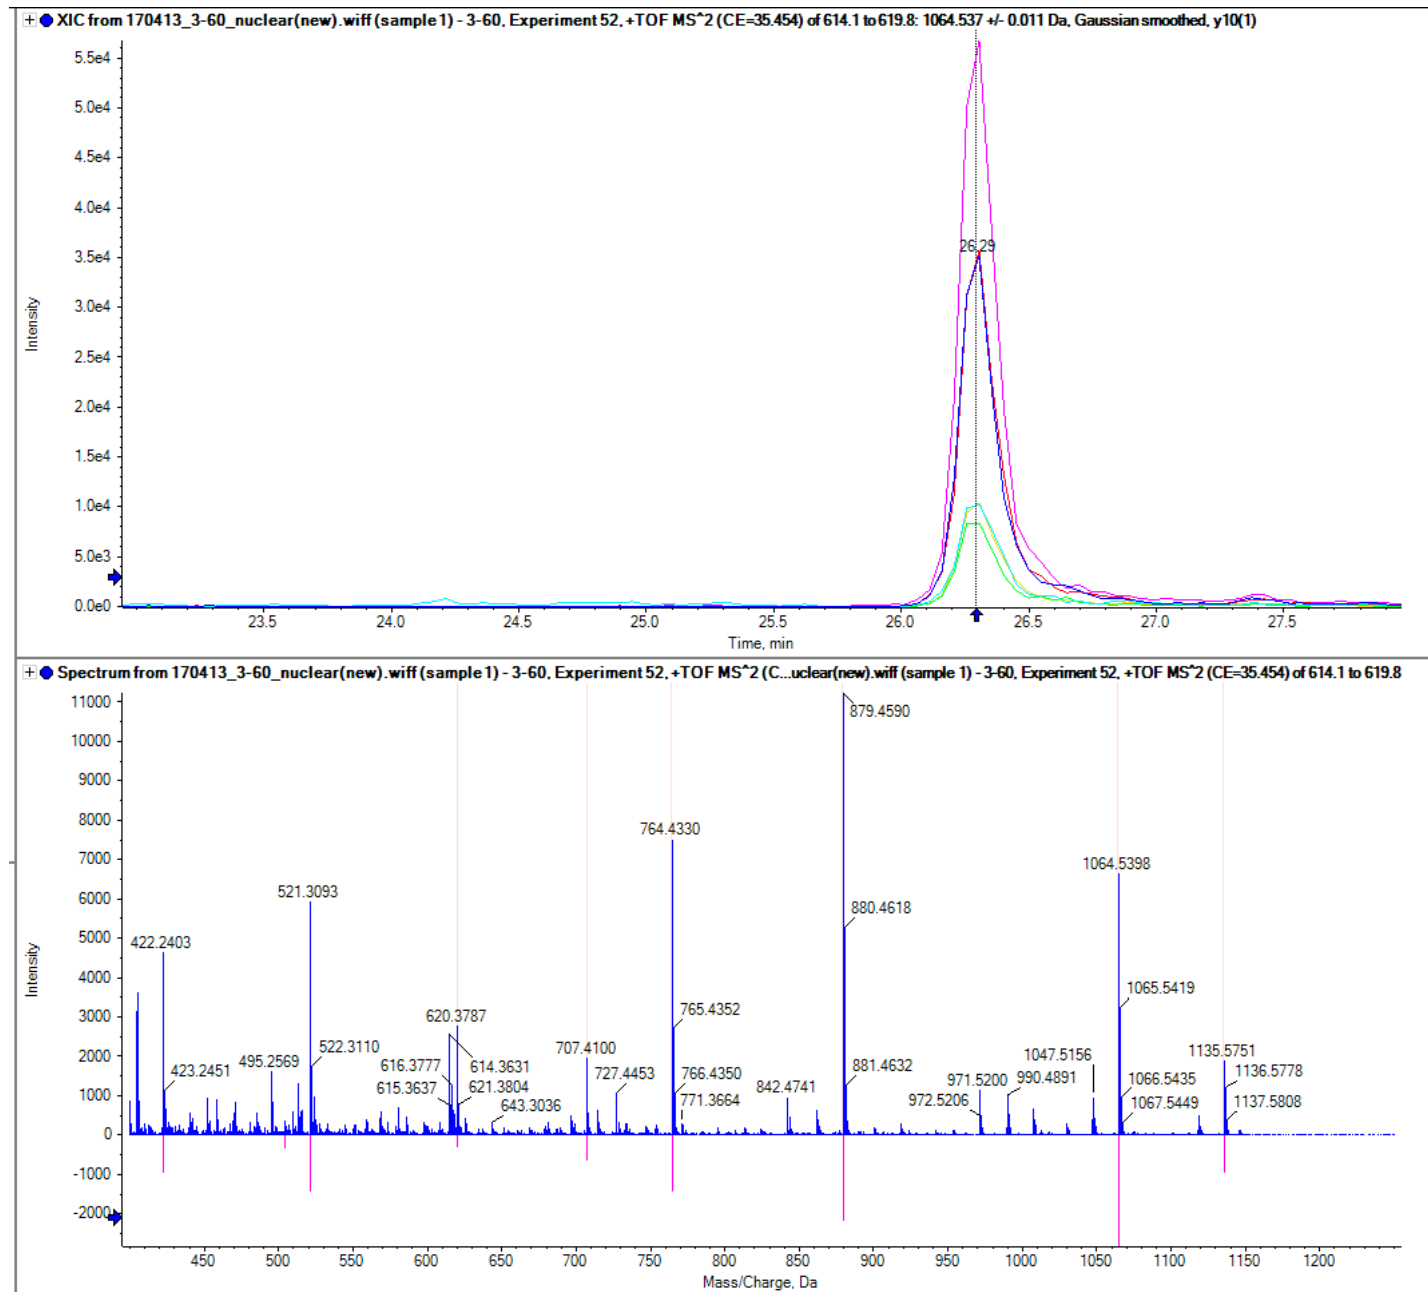

sp|P49450|CENPA\_HUMAN

SPSPTPTGPSR

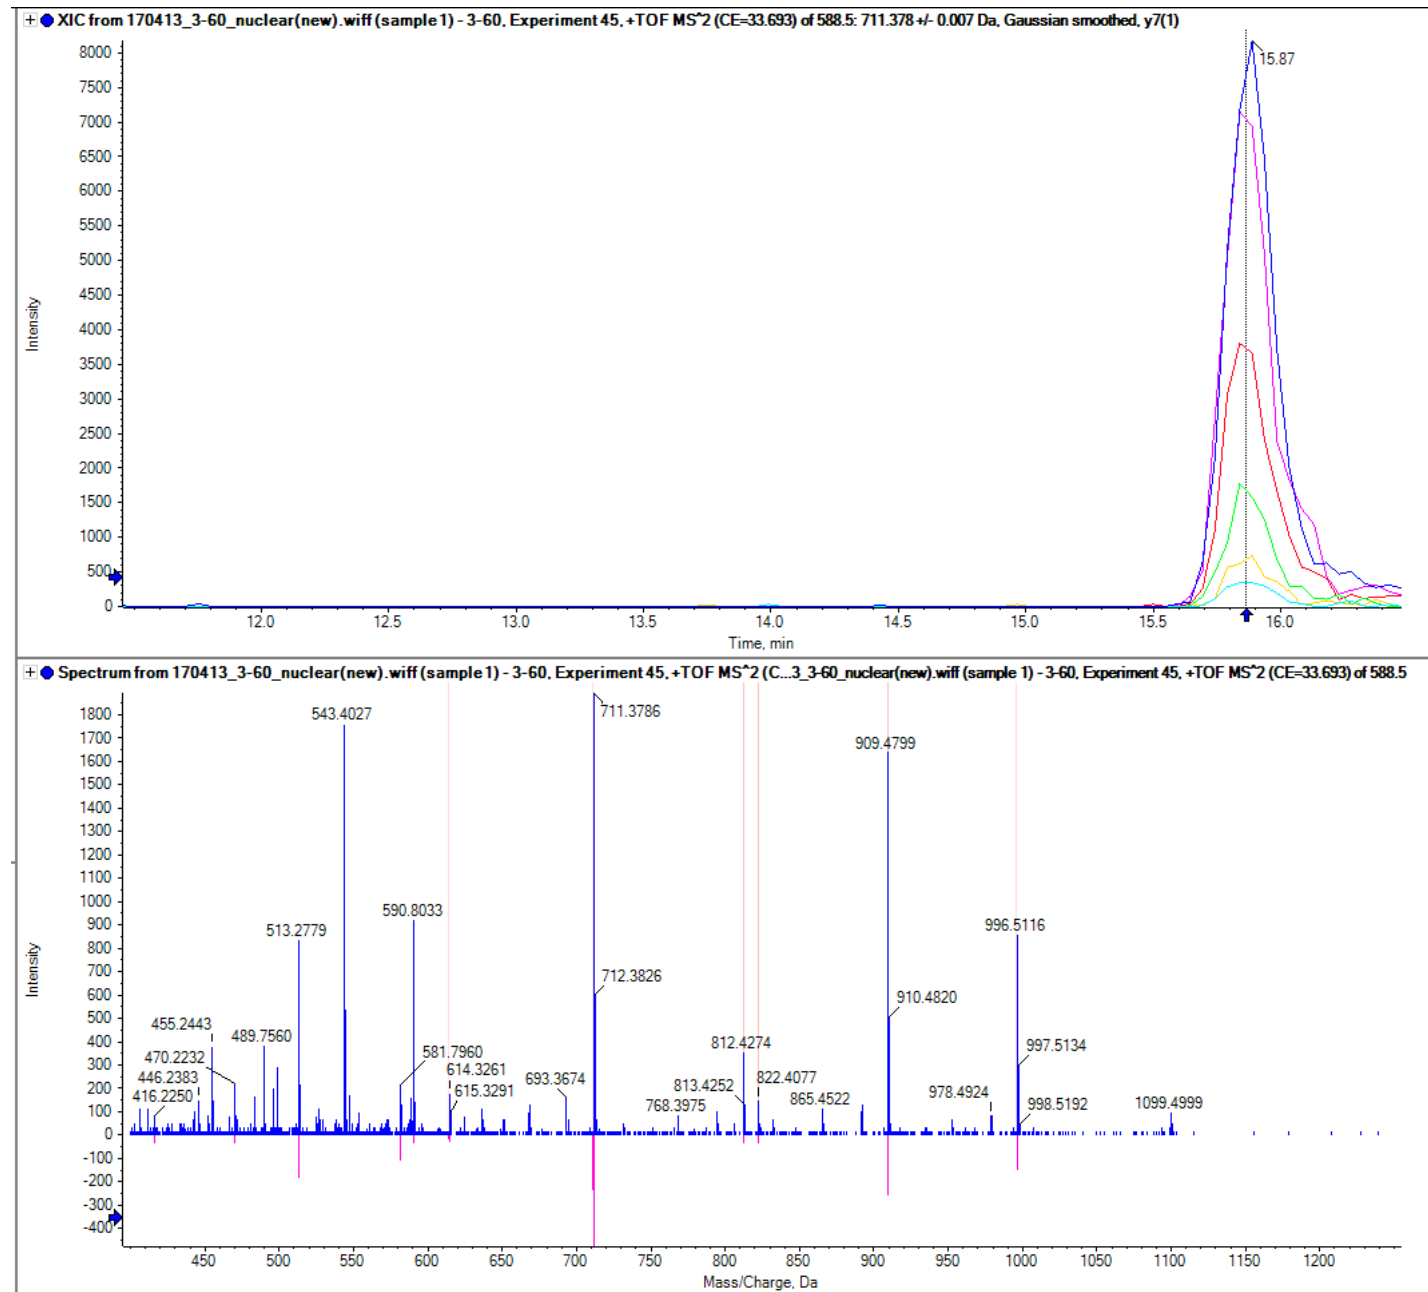

sp|O14647|CHD2\_HUMAN

MWEEYPDVYGV

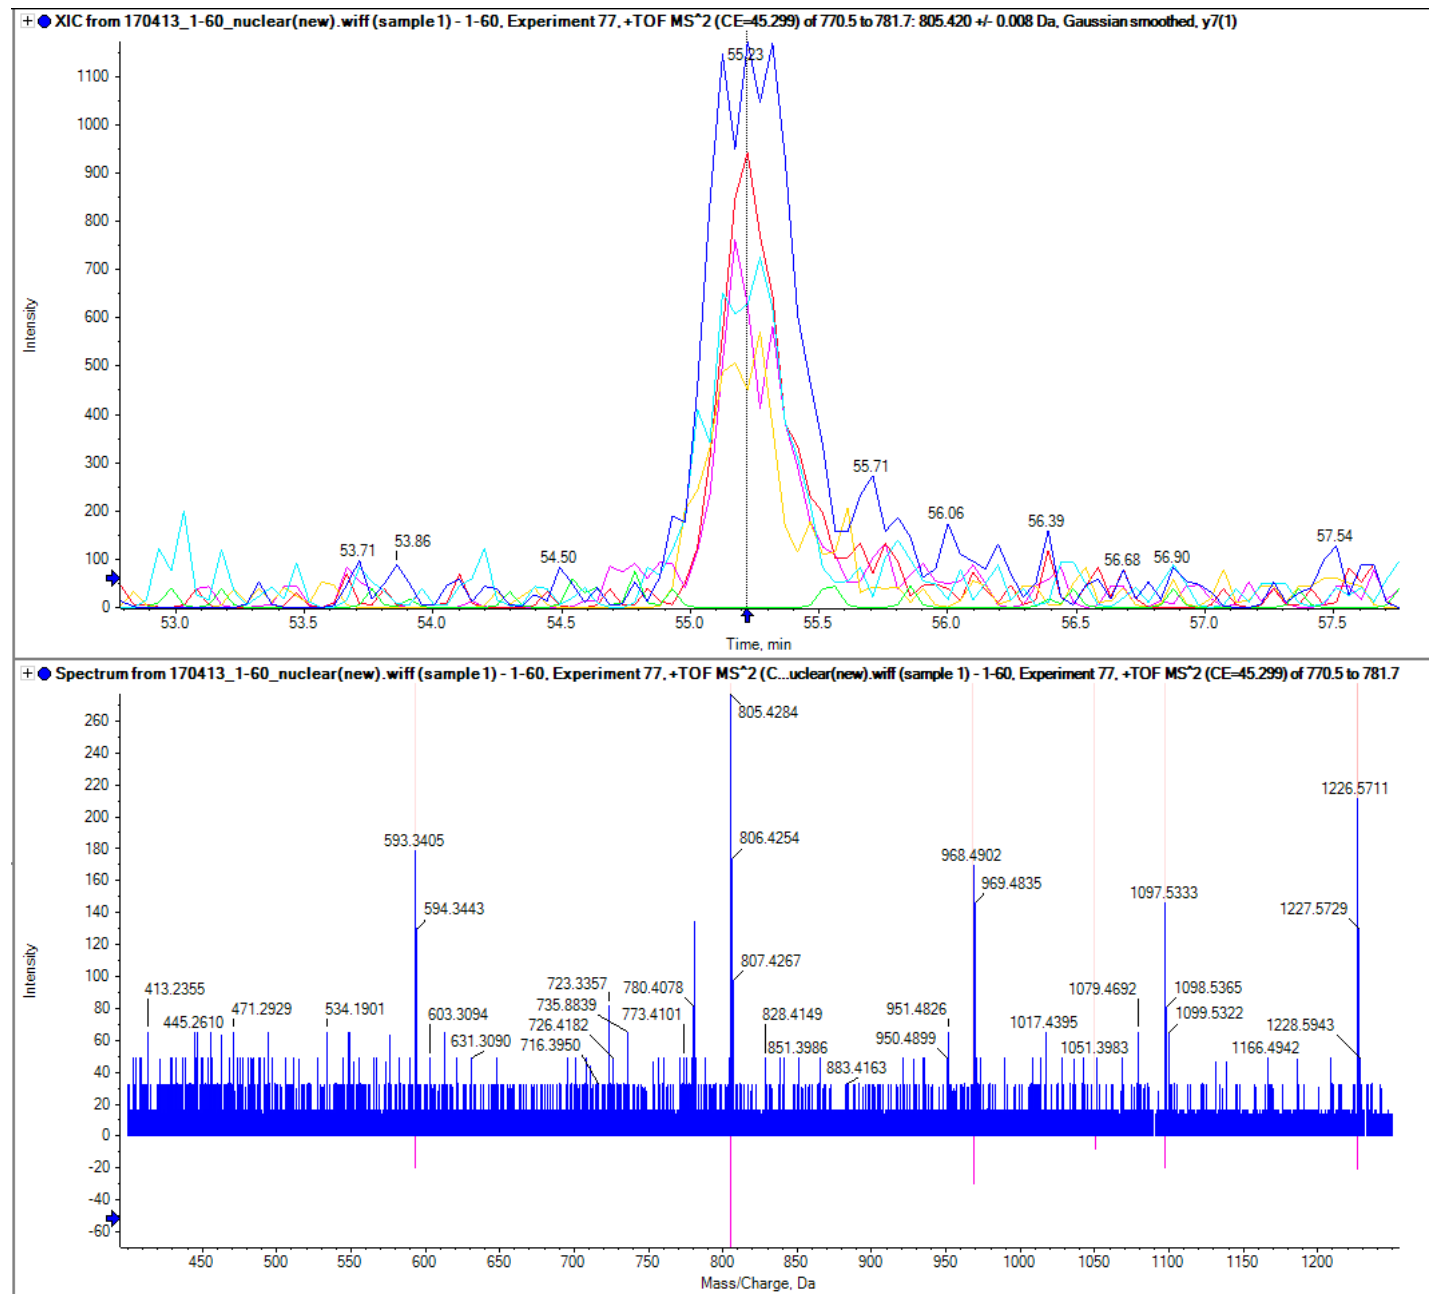

sp|P62310|LSM3\_HUMAN

GDGVVLVAPPLR

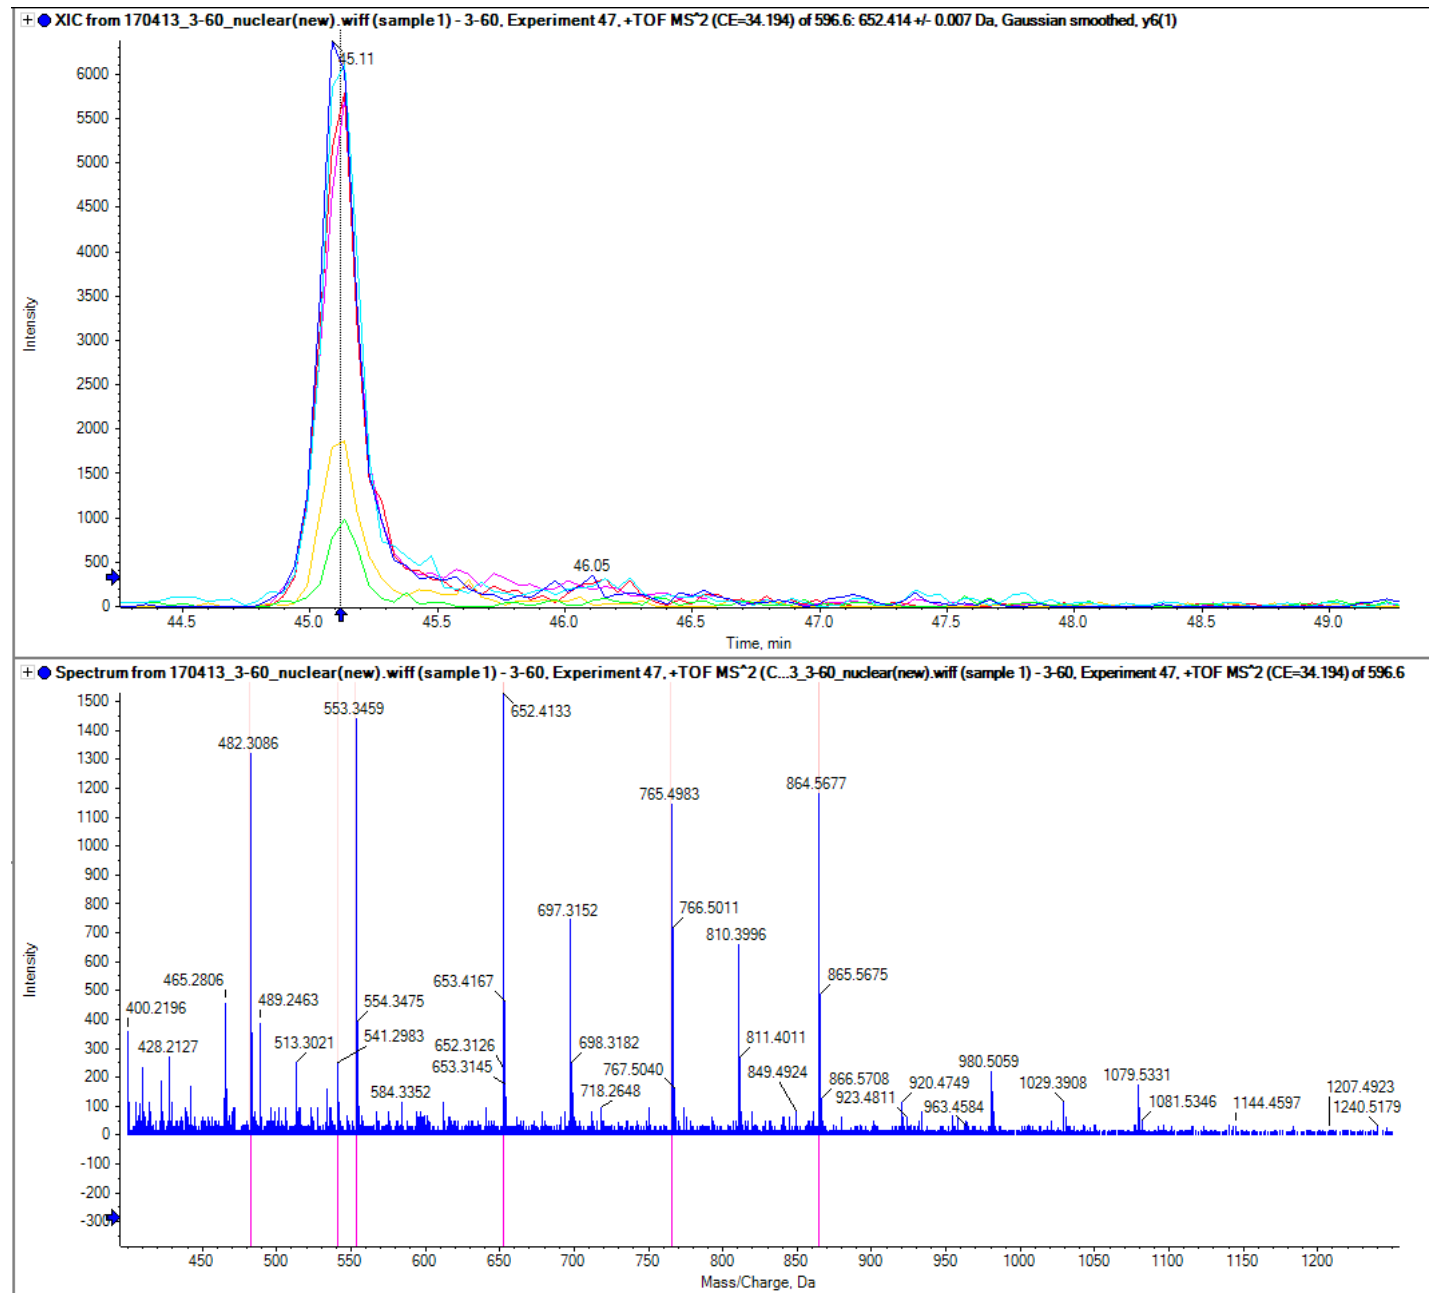

sp|P50914|RL14\_HUMAN

LVAIVDVIDQNR

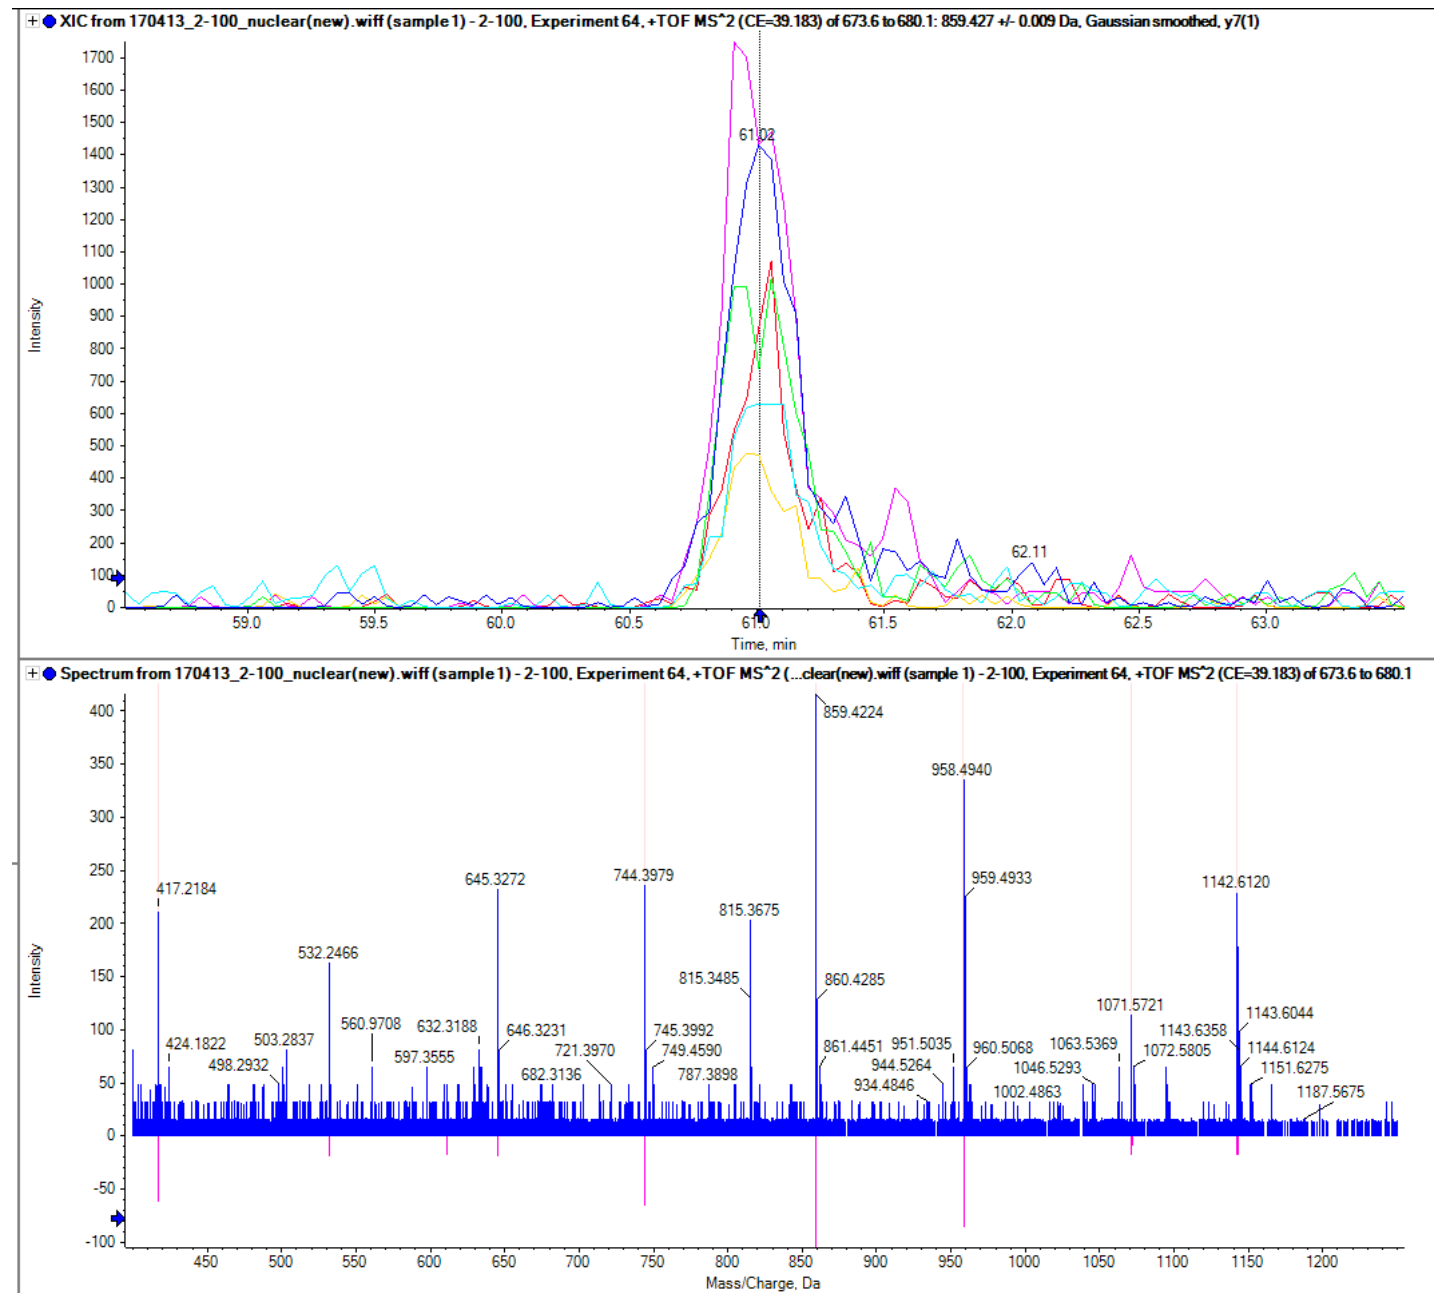

sp|Q9HAE3|EFCB1\_HUMAN

LSFADYELAVR

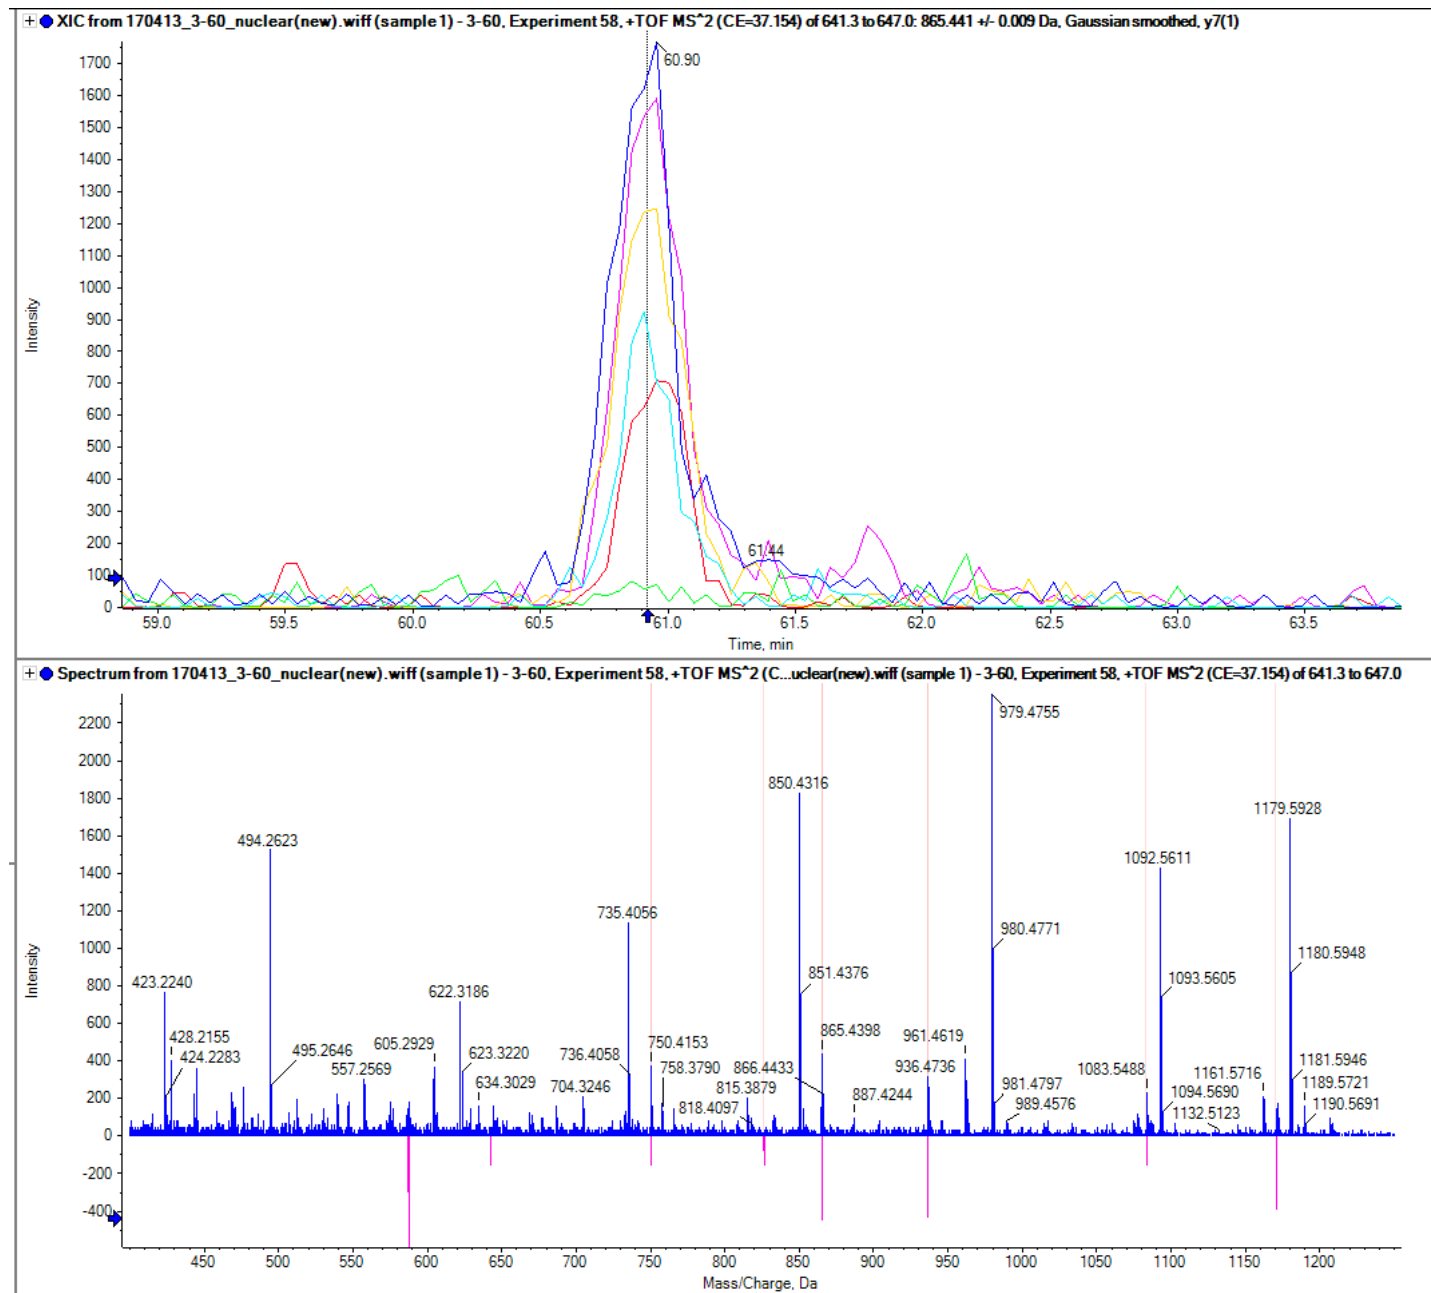

sp|P31153|METK2\_HUMAN

FVIGGPQGDAGLTGR

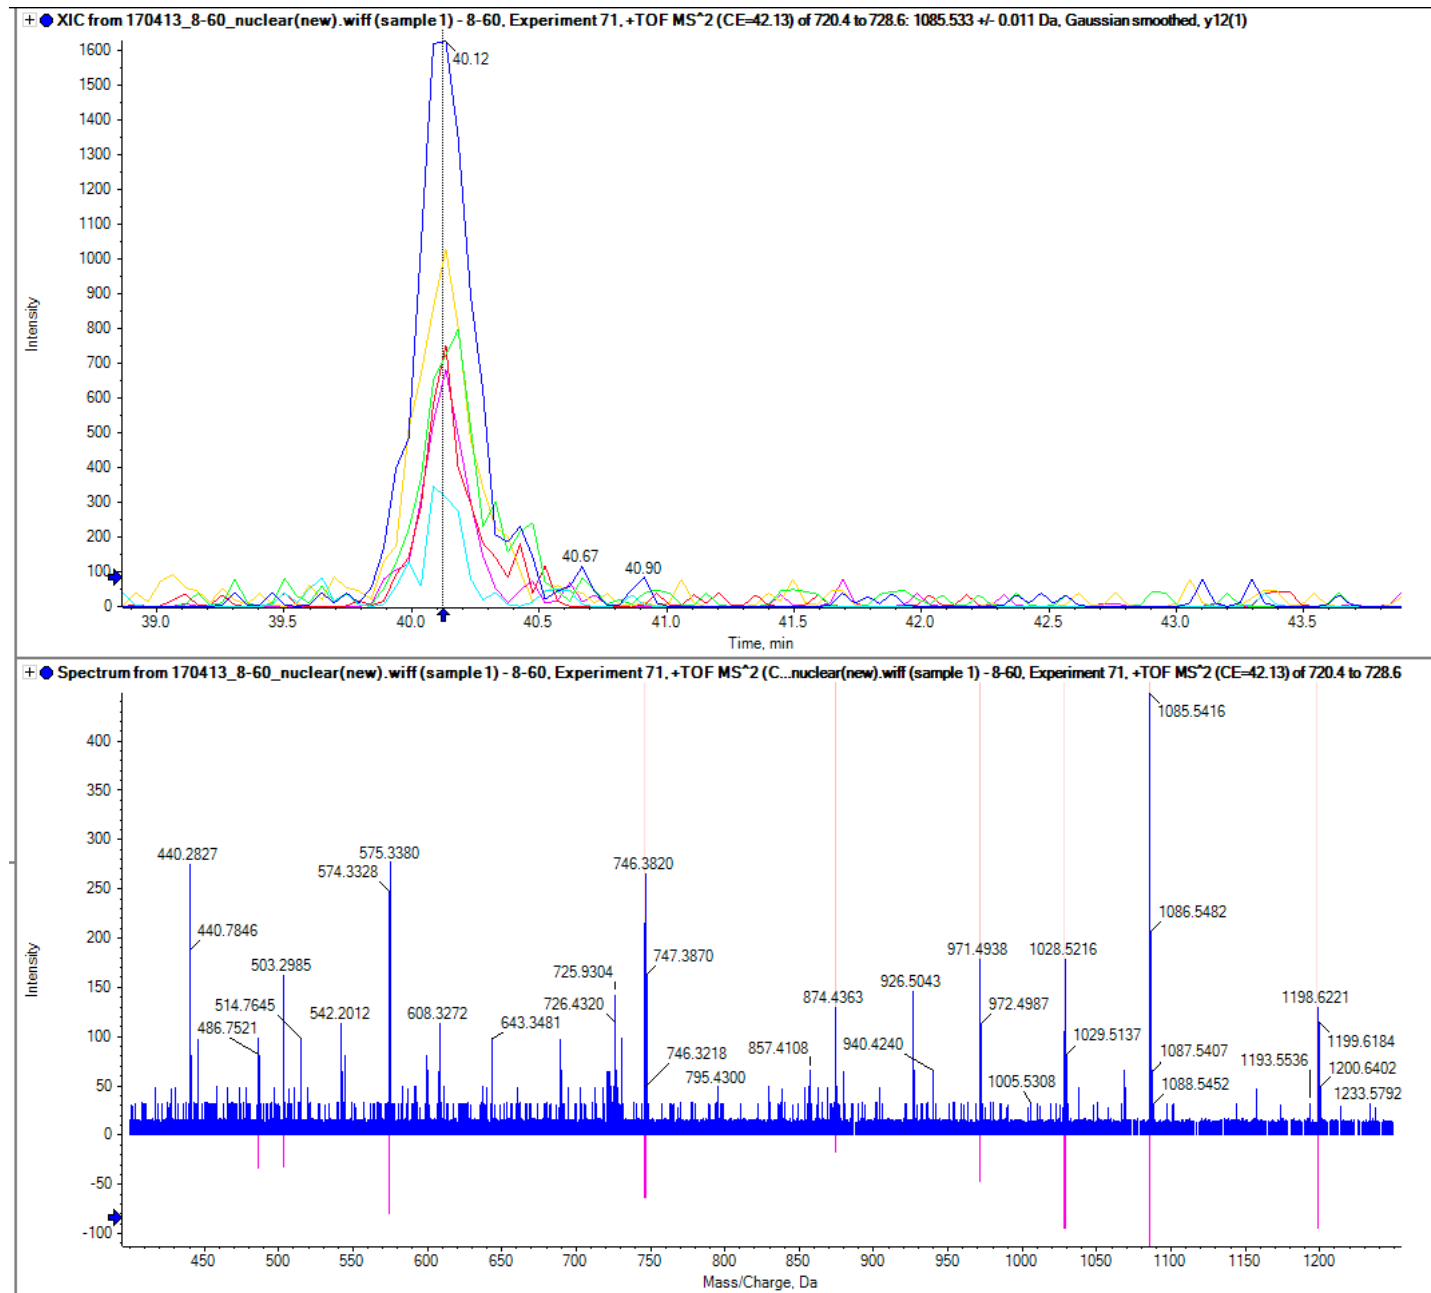



sp|O00487|PSDE\_HUMAN

MLGEFVDDYTVR

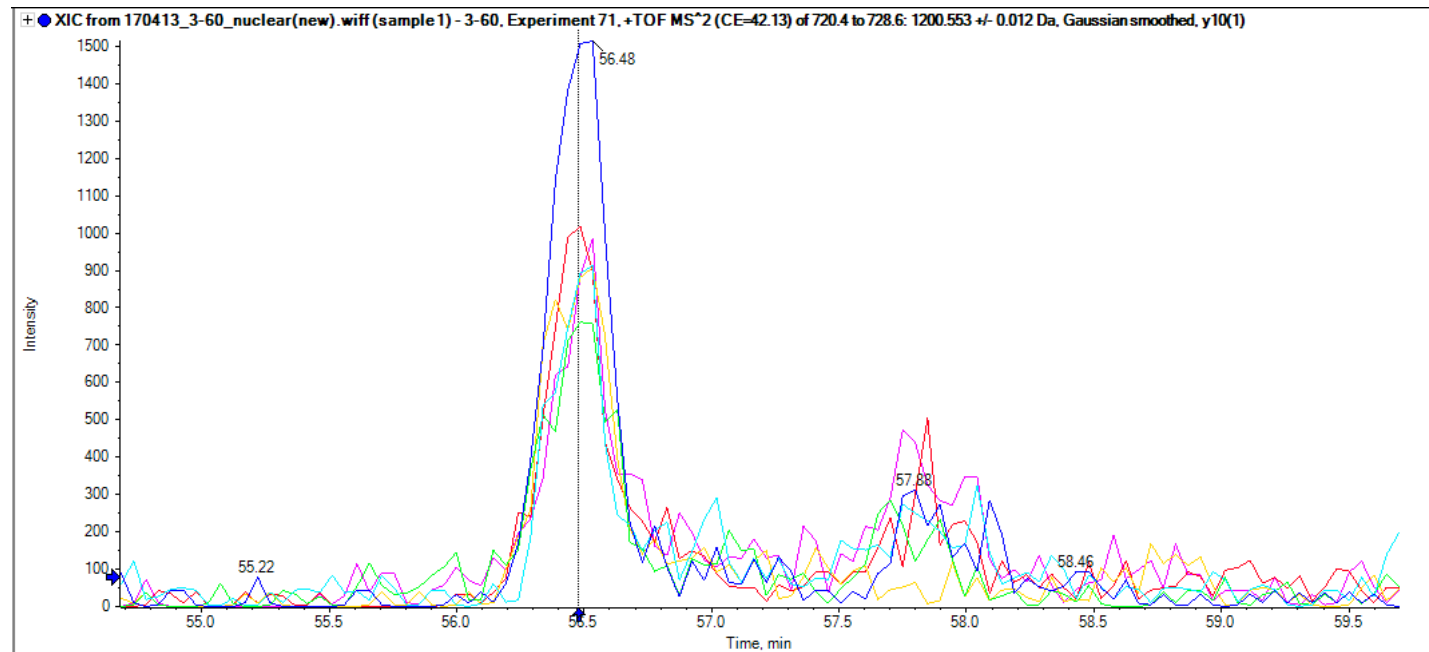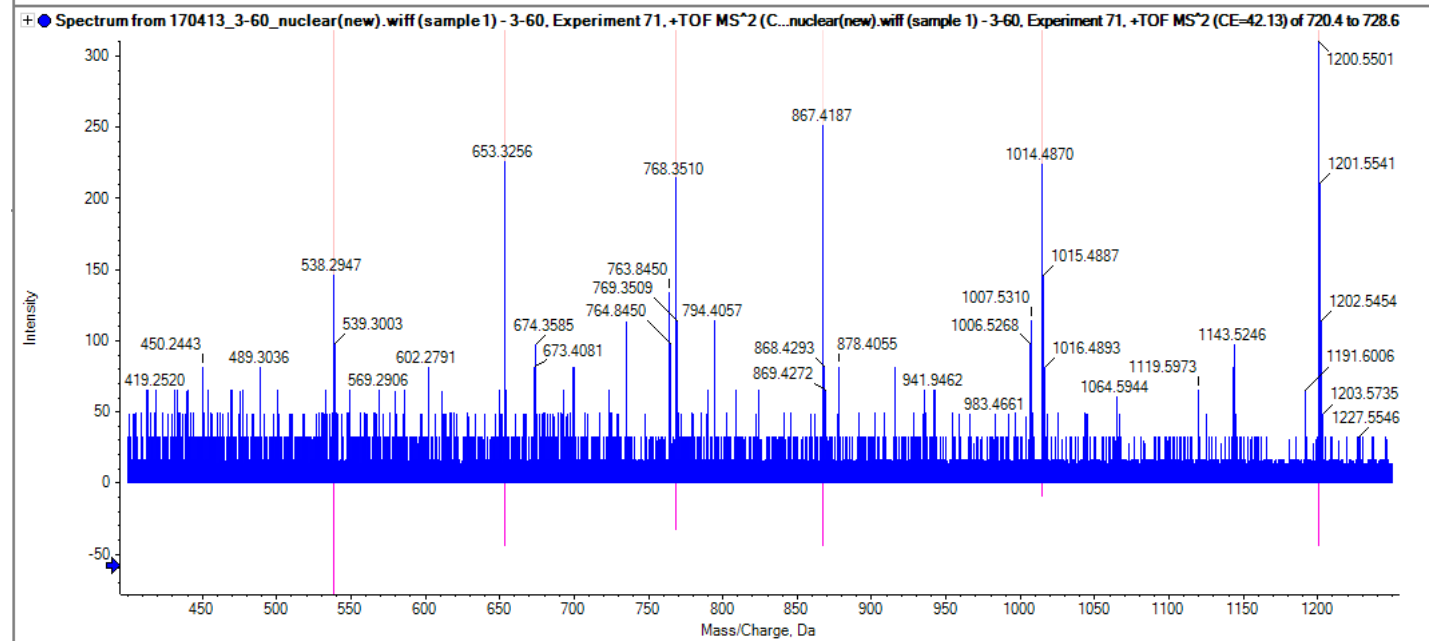

sp|Q96KX0|LYZL4\_HUMAN

FNPMAIYENTR

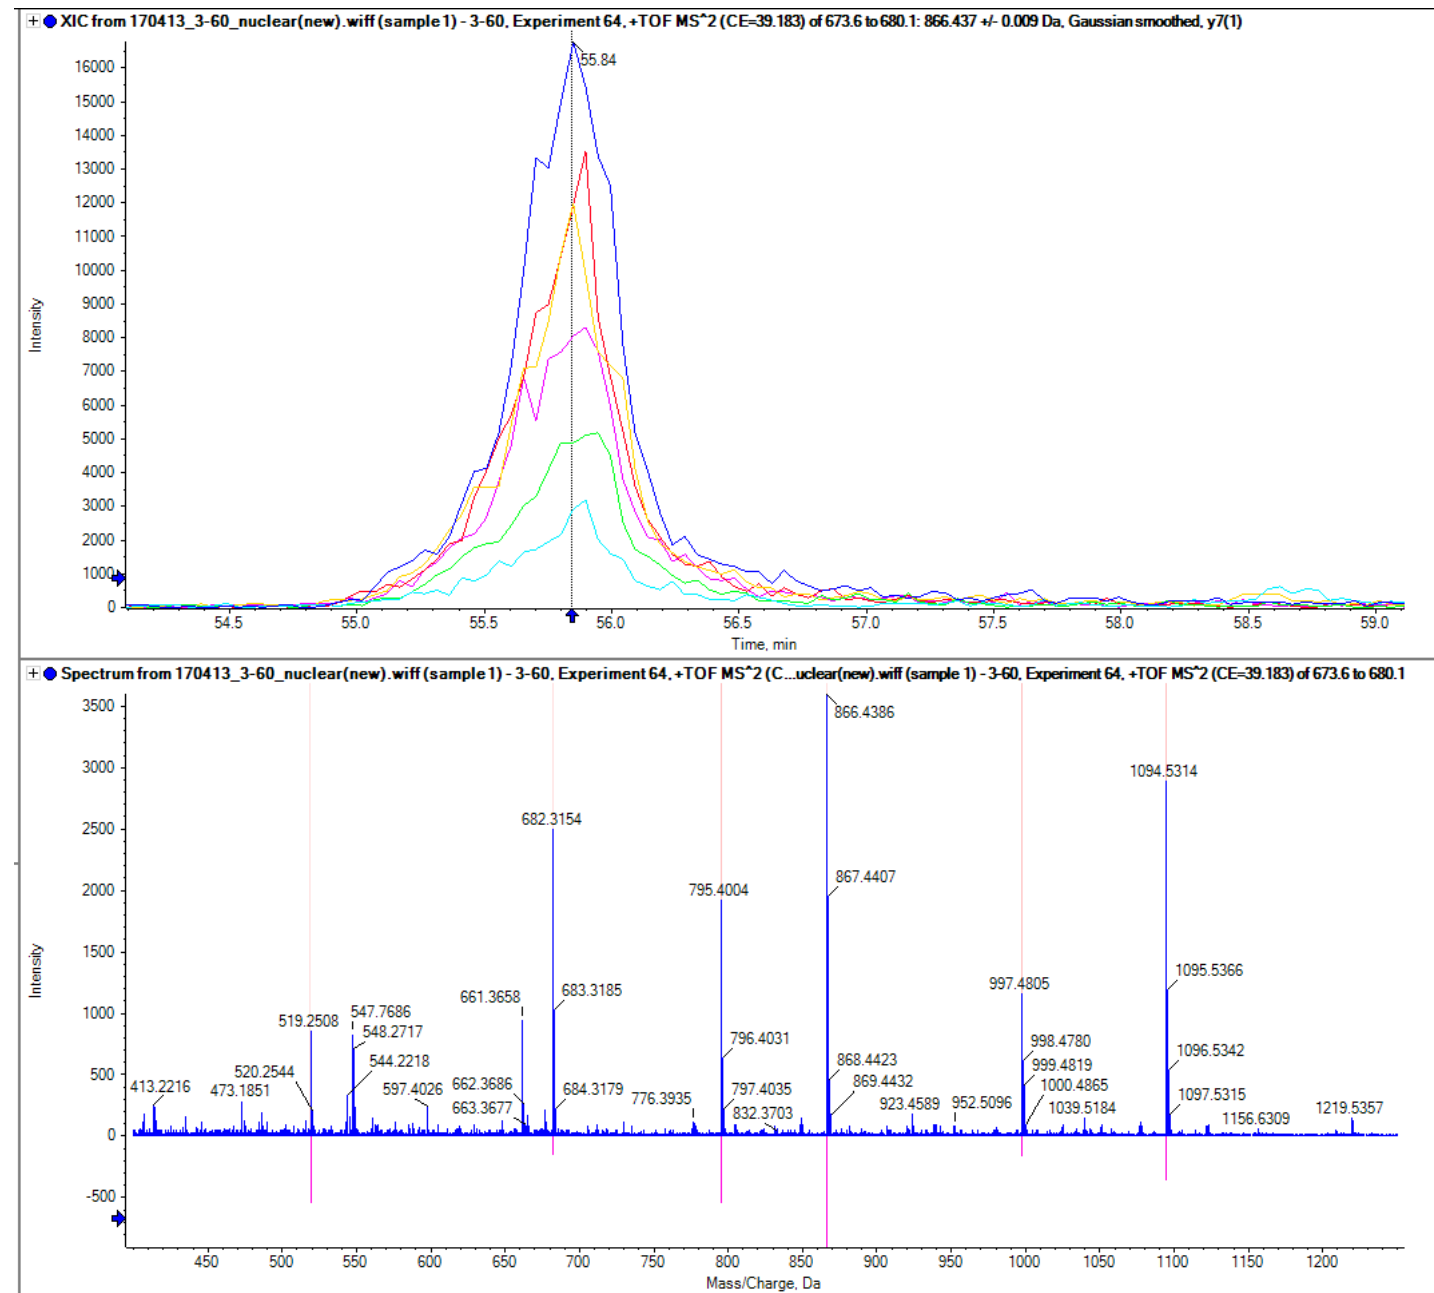

sp|Q9UKR5|ERG28\_HUMAN

LYTGKPNLVNGLQAR

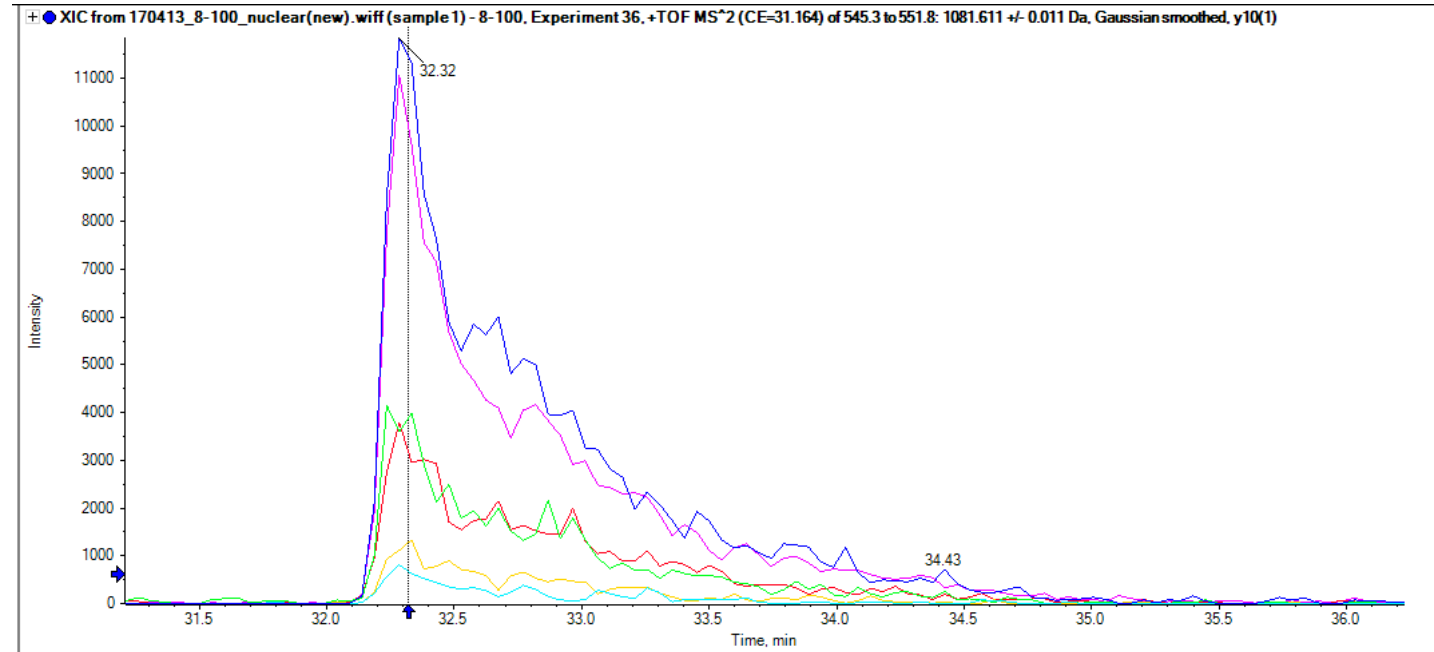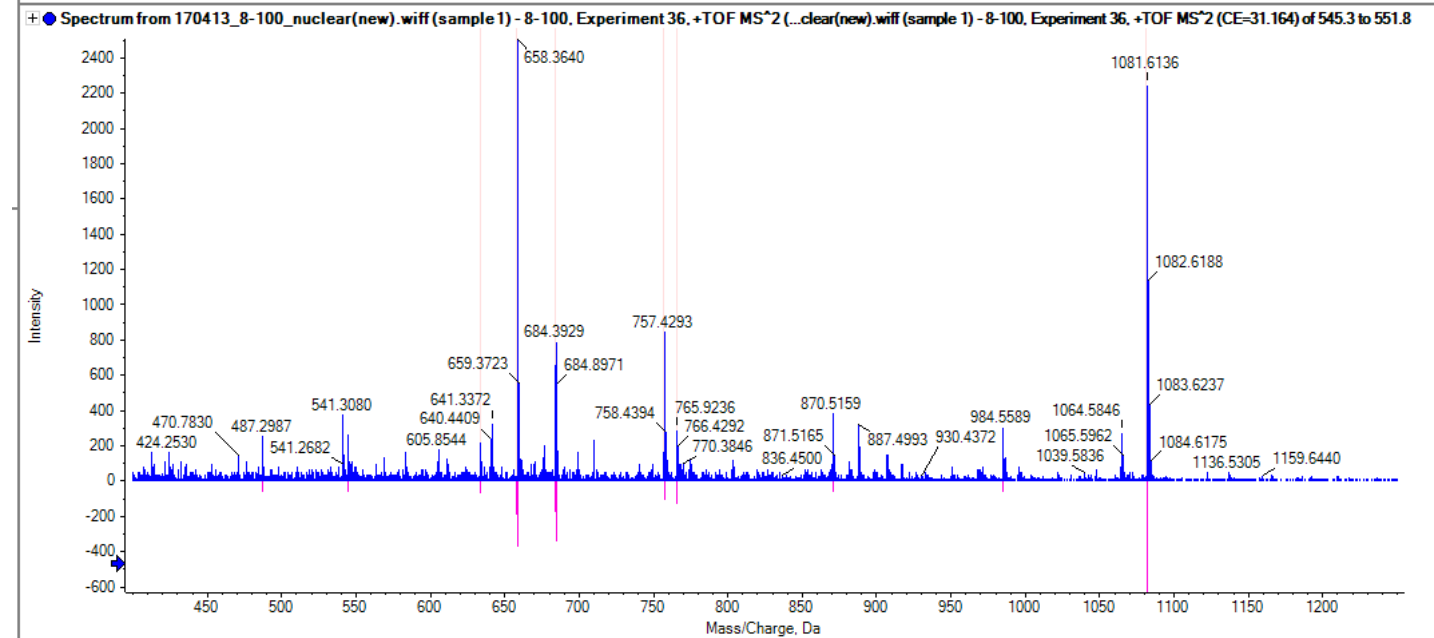

sp|P16219|ACADS\_HUMAN

GISAFLVPMPTPGLTLGK

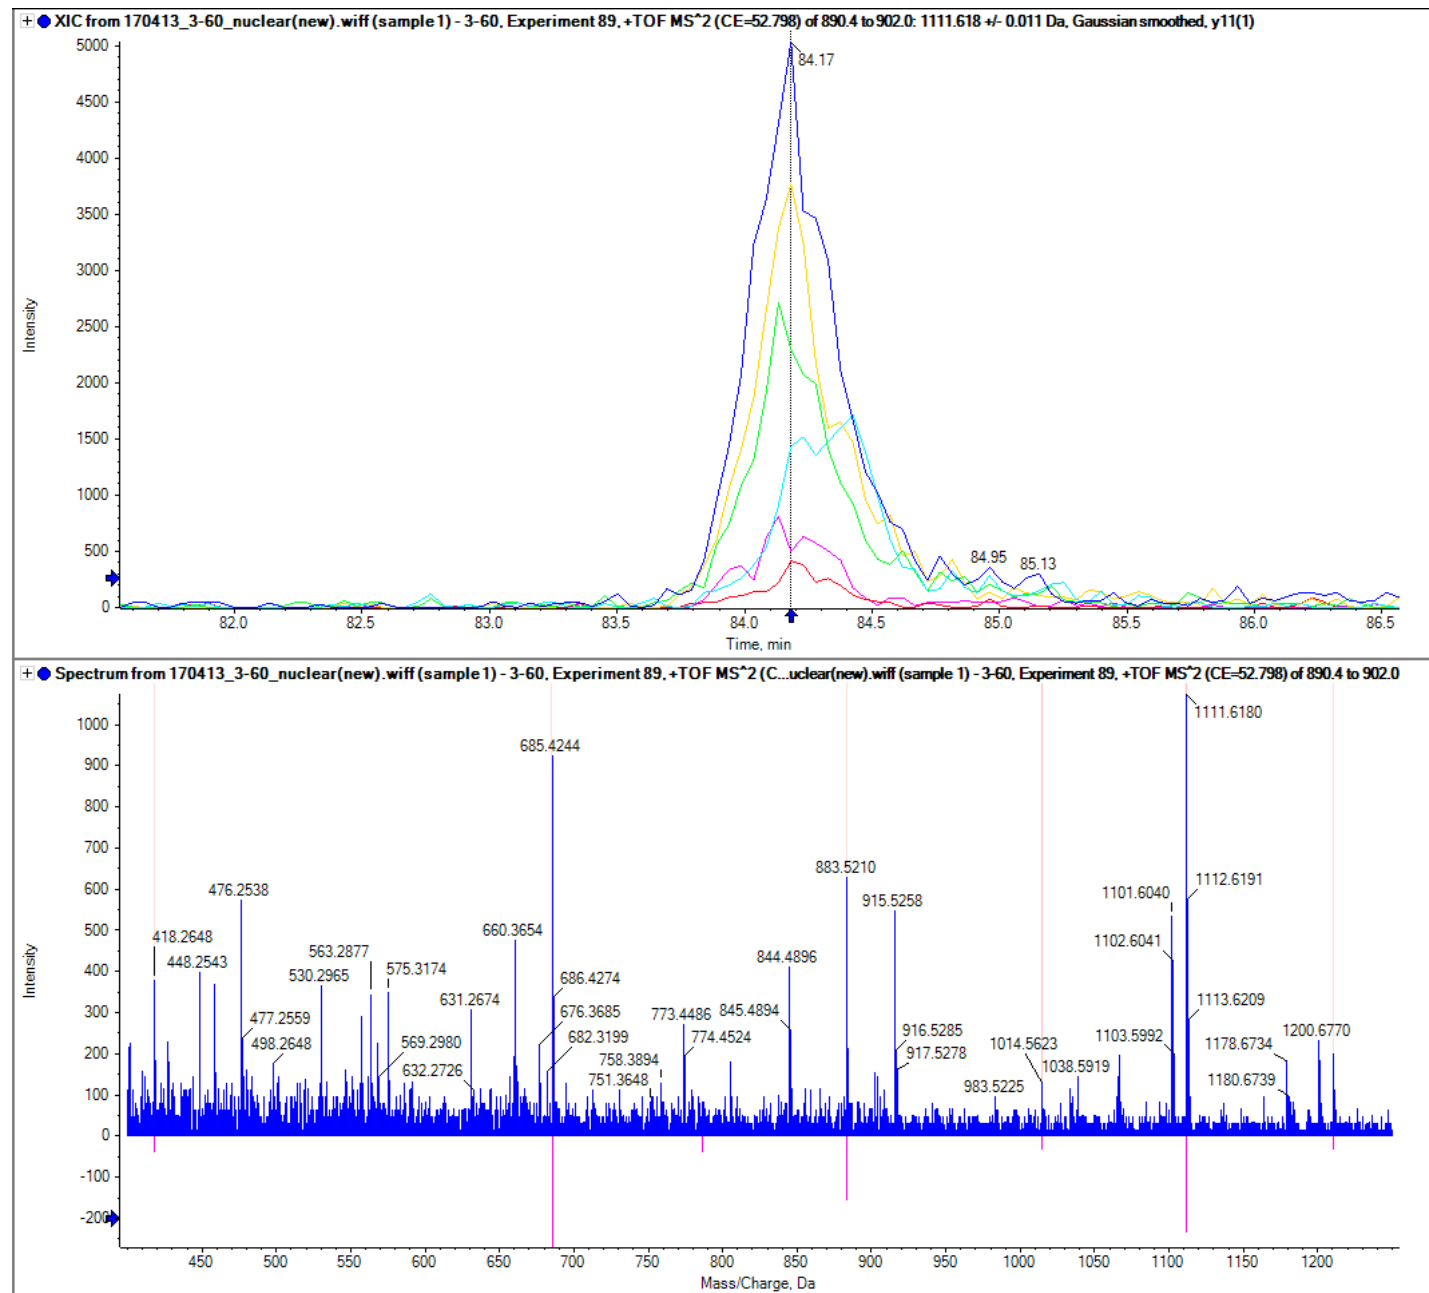

sp | Q9NQT6 | FSCN3\_HUMAN

[1Ac]-MDETEWIHR

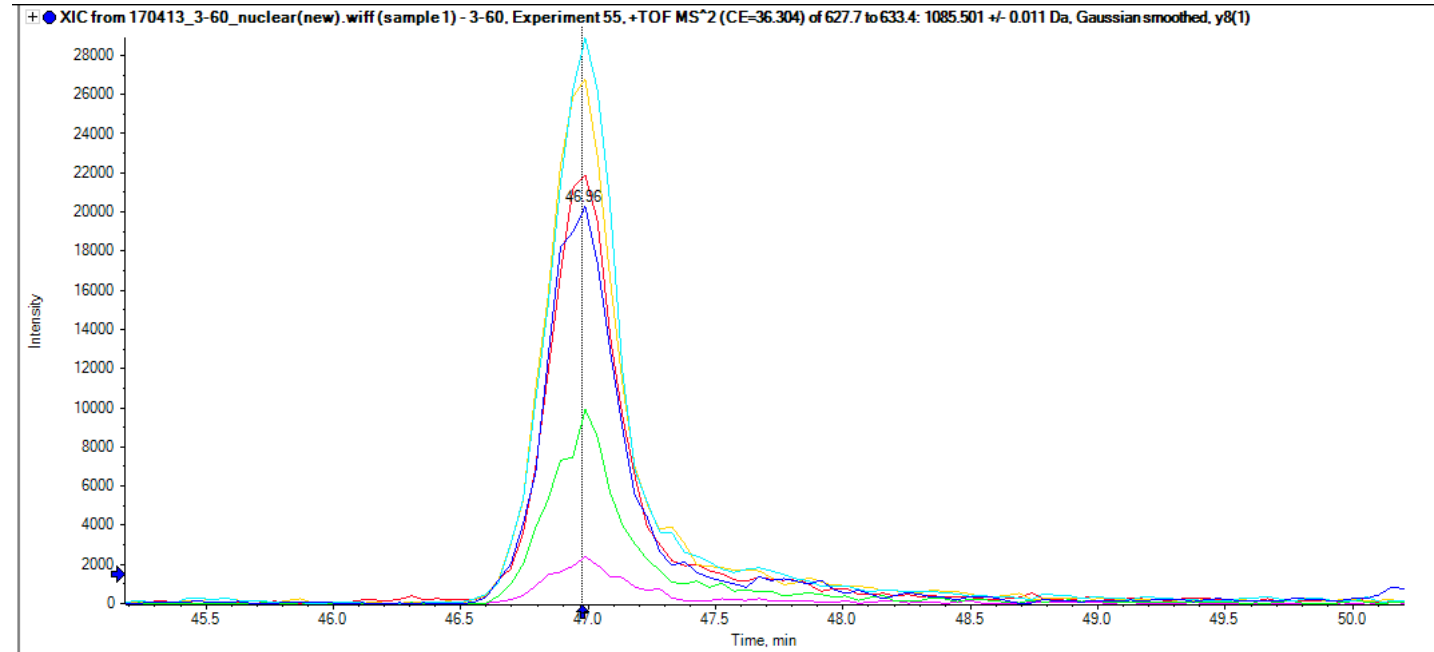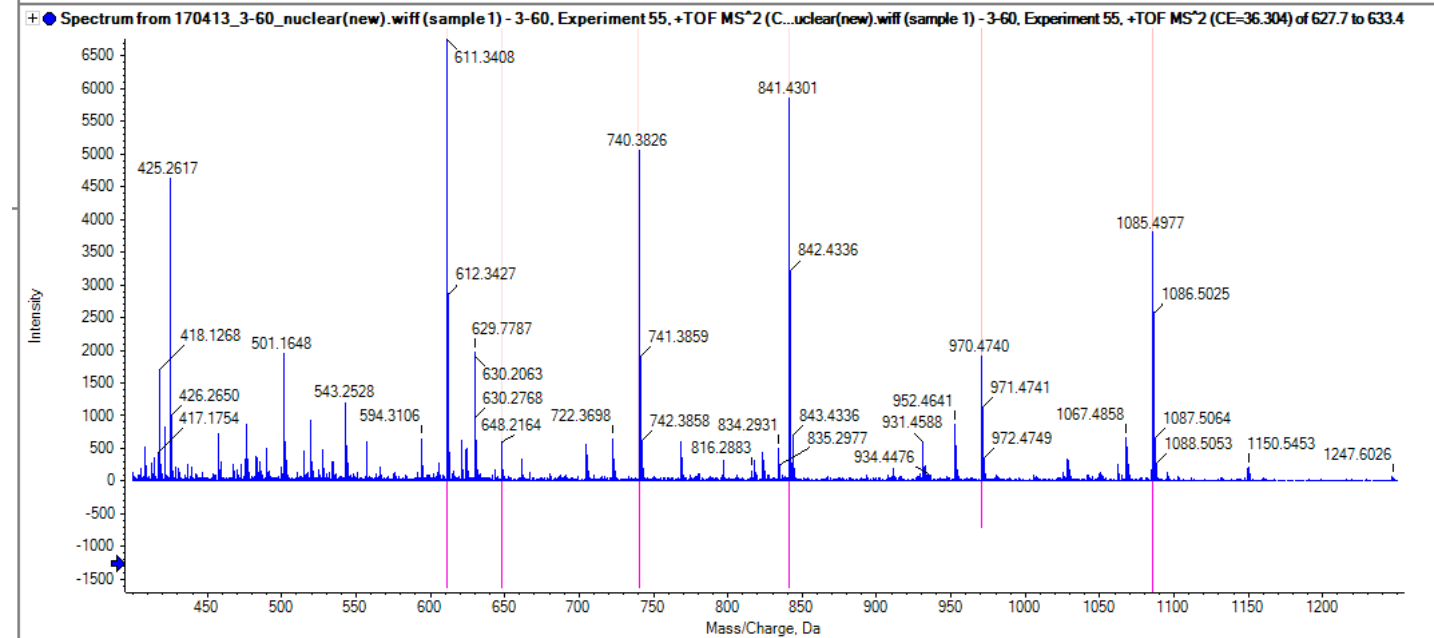

sp|P28838|AMPL\_HUMAN

WAHLDIAGVMTNK

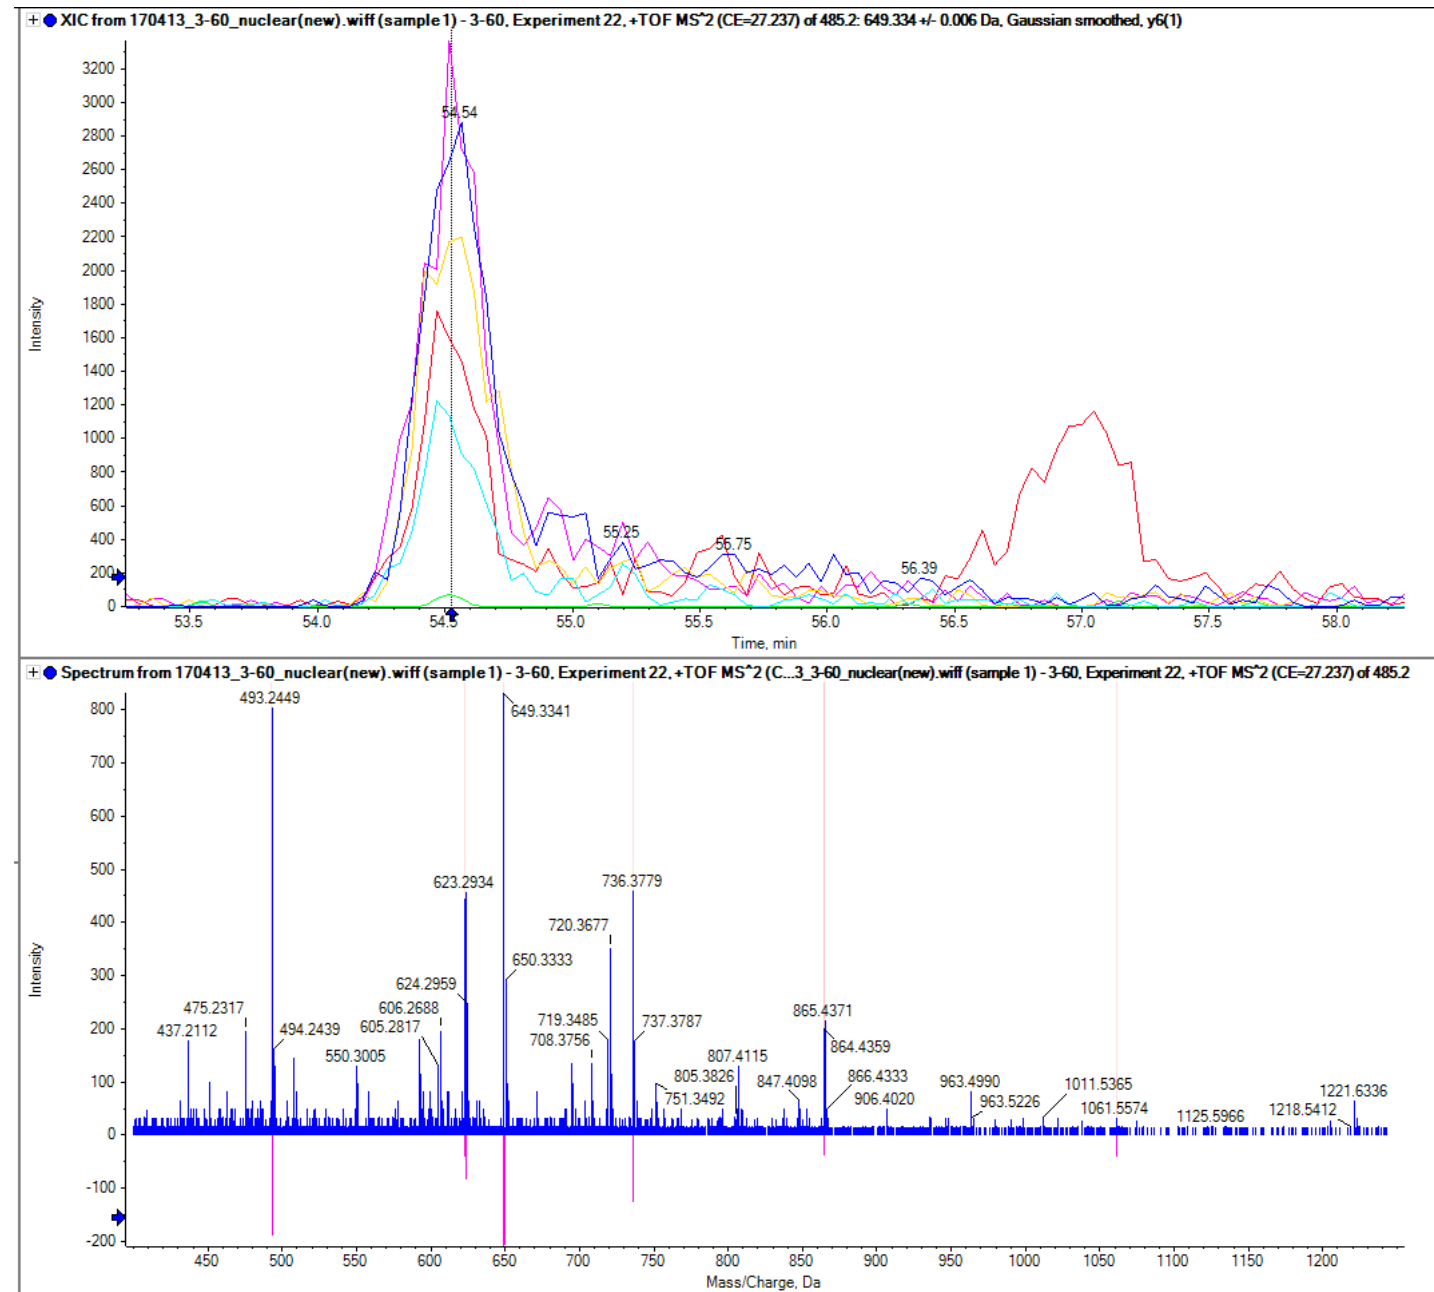

sp|O43298|ZBT43\_HUMAN

VEFPDFSSTILQK

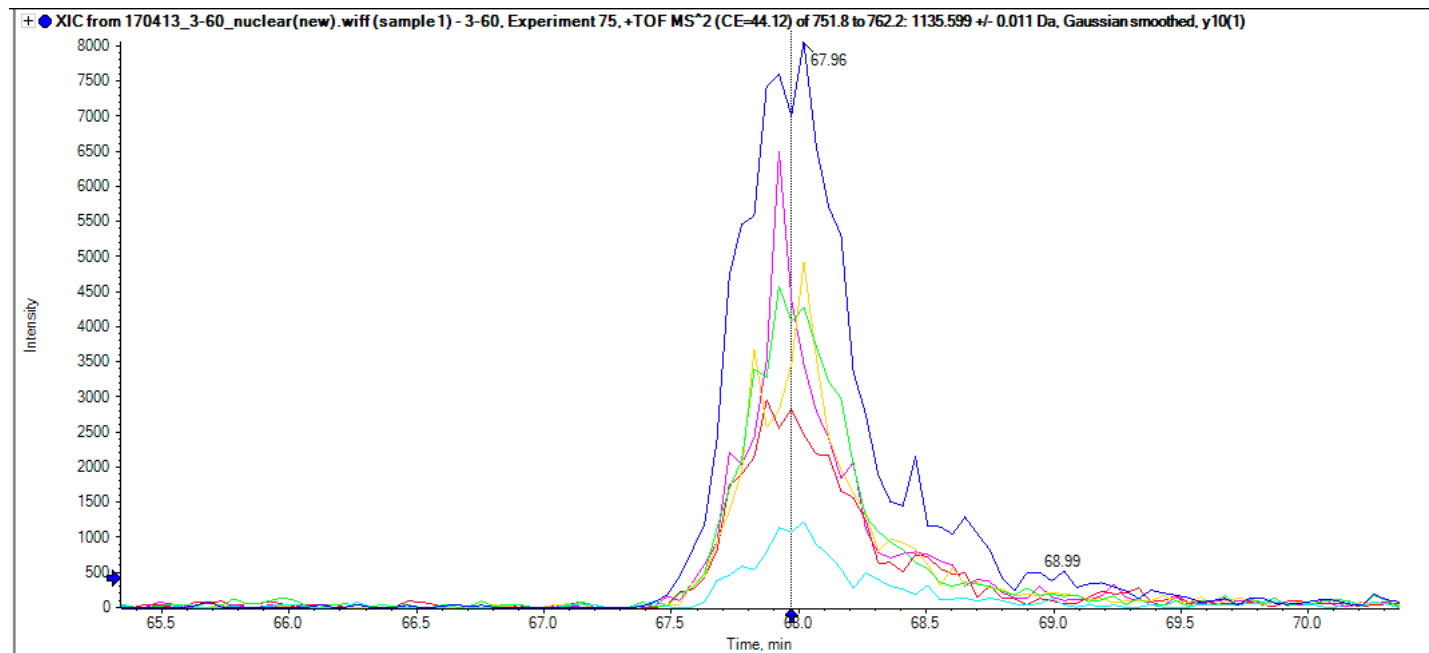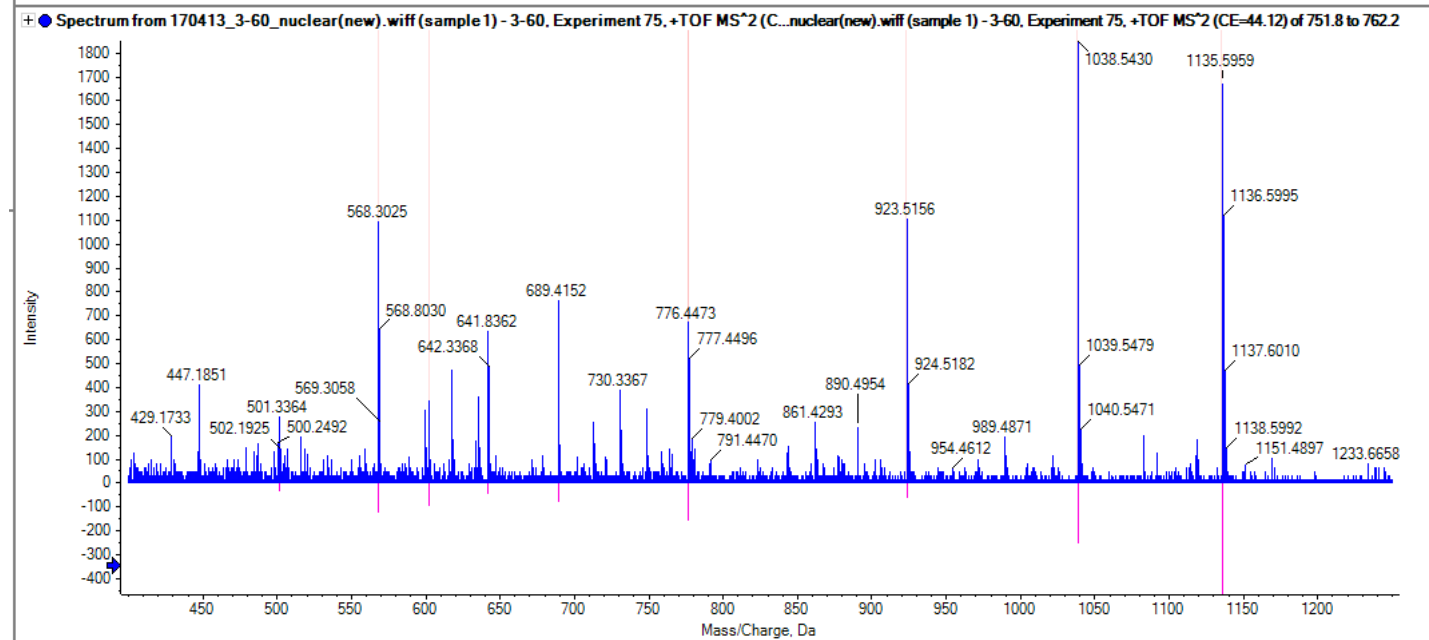

sp|Q9UIA9|XPO7\_HUMAN

NYVLNYLATRPK

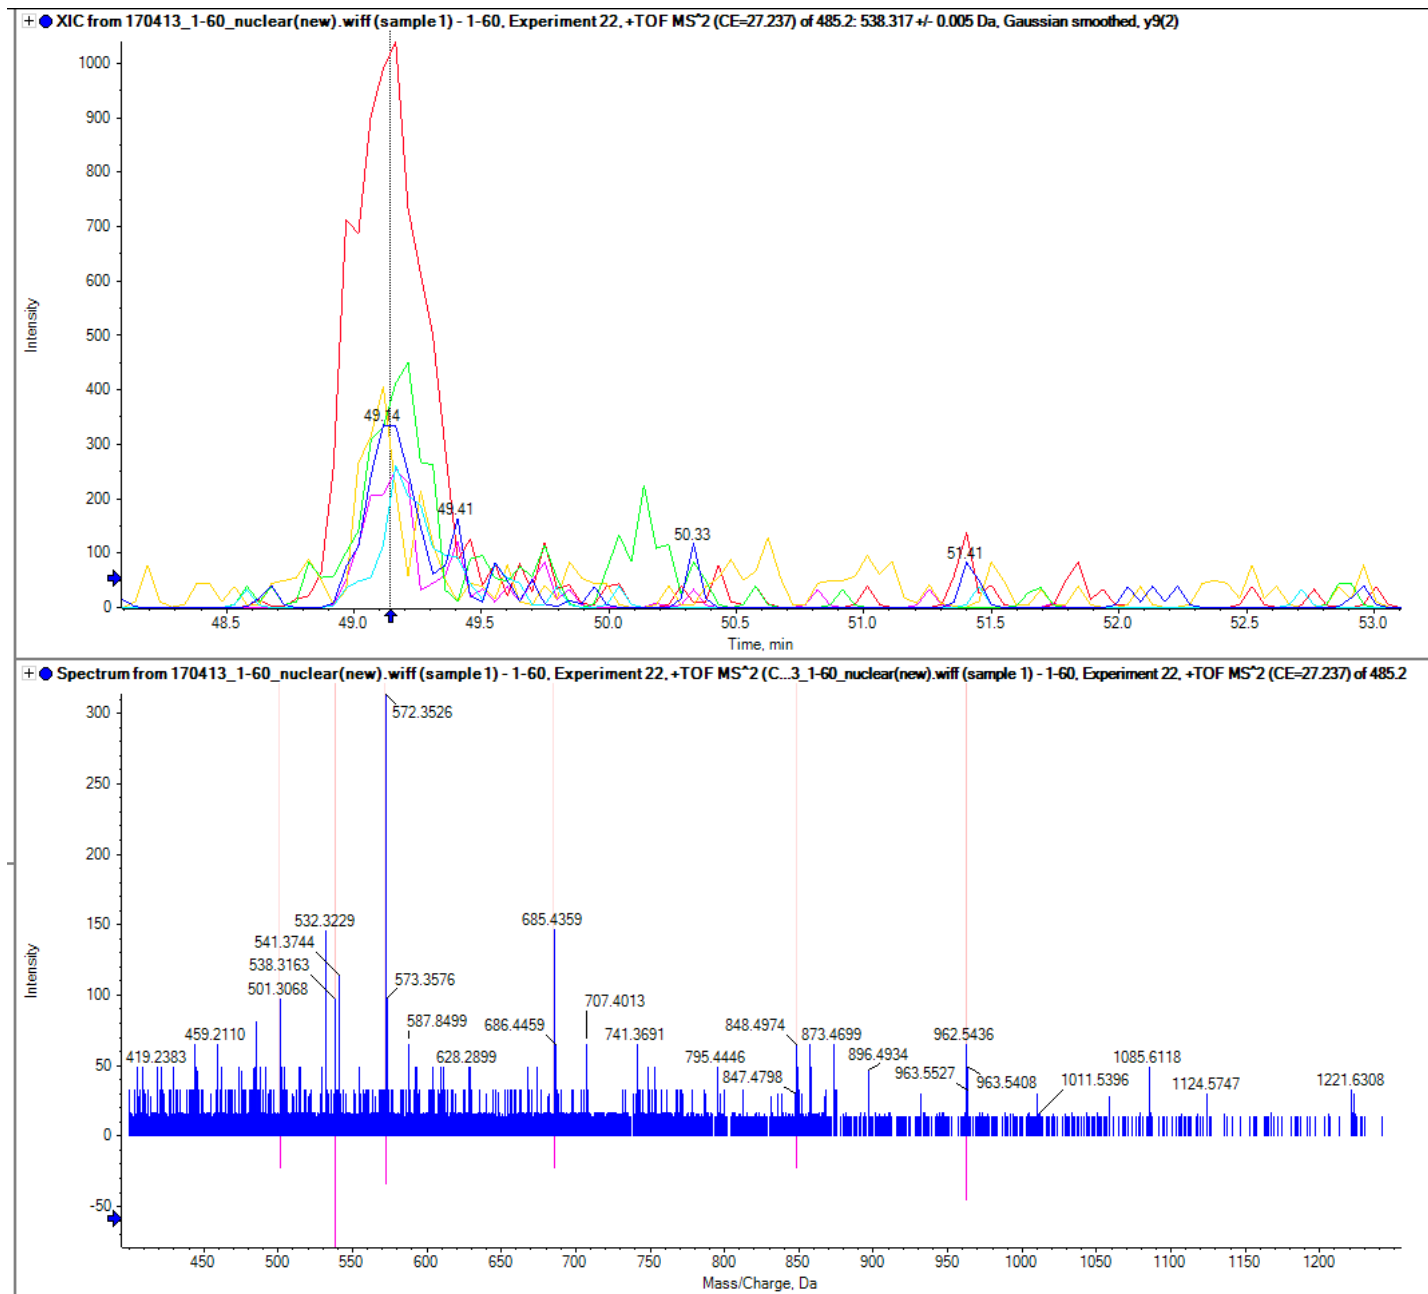



sp|P54578|UBP14\_HUMAN

AQLFALTGVQPAR

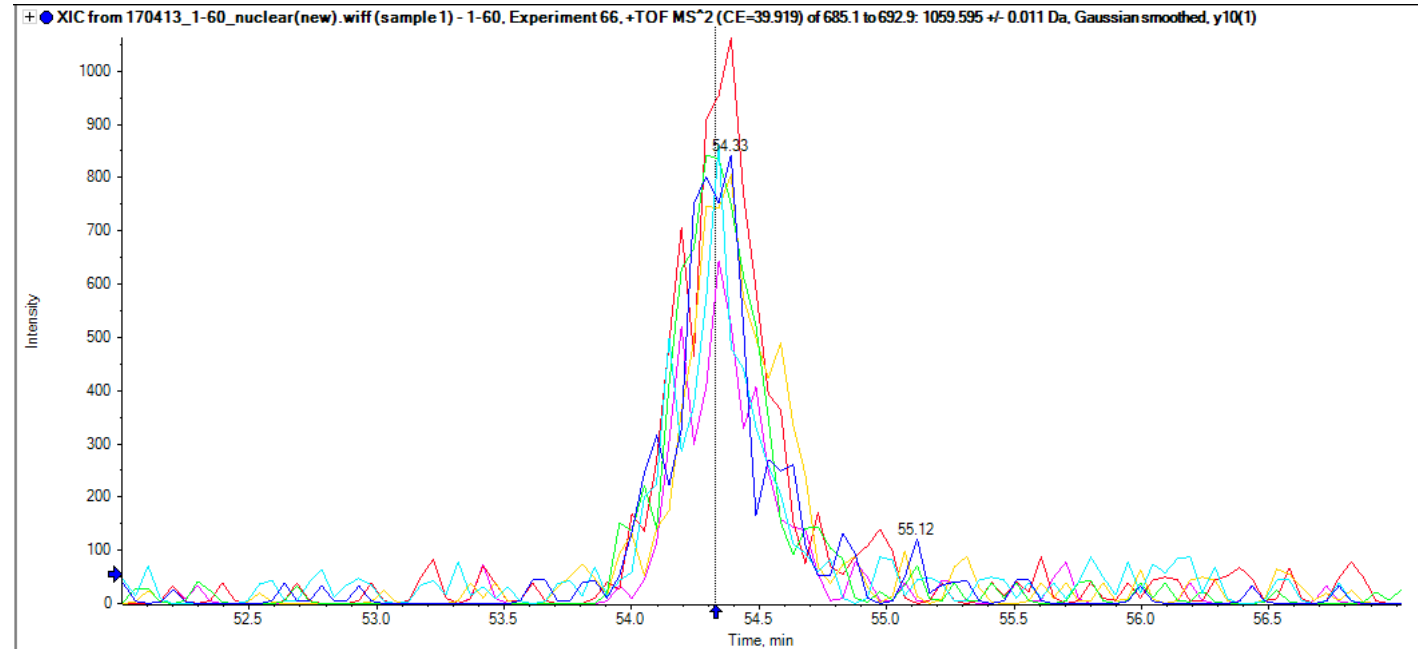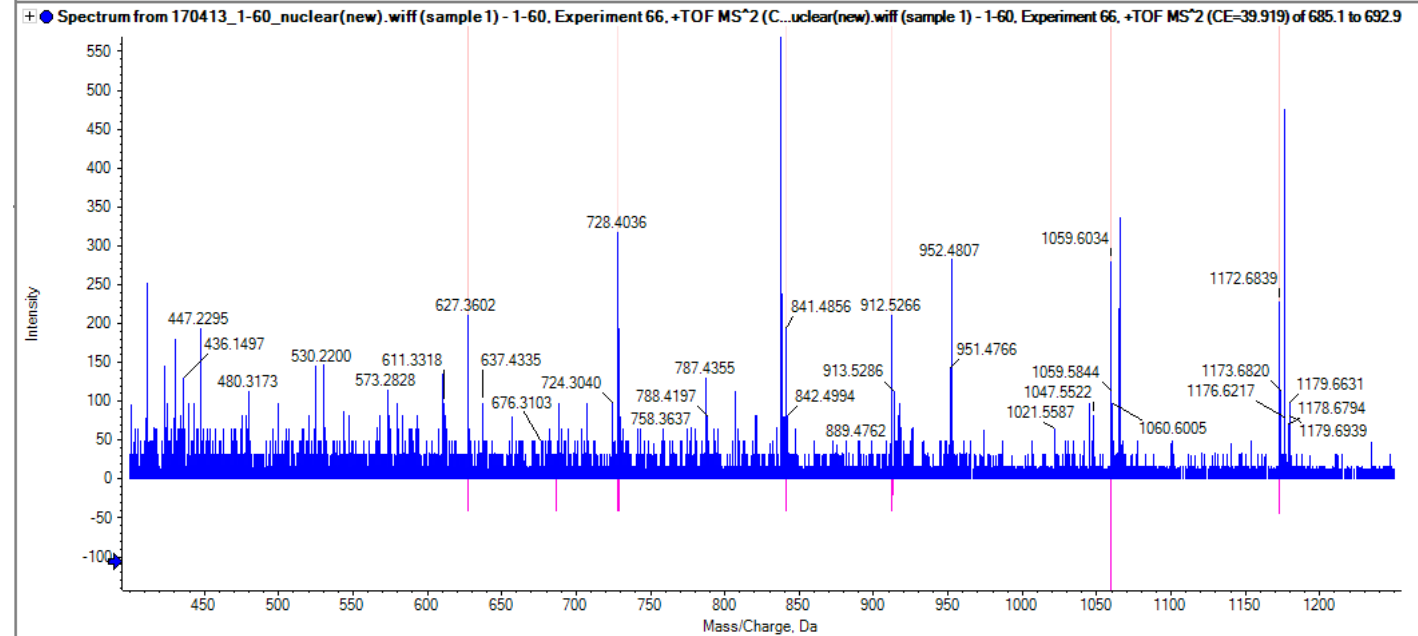

sp|P48163|MAOX\_HUMAN

QITDNIFLTTAEVIAQQVSDK

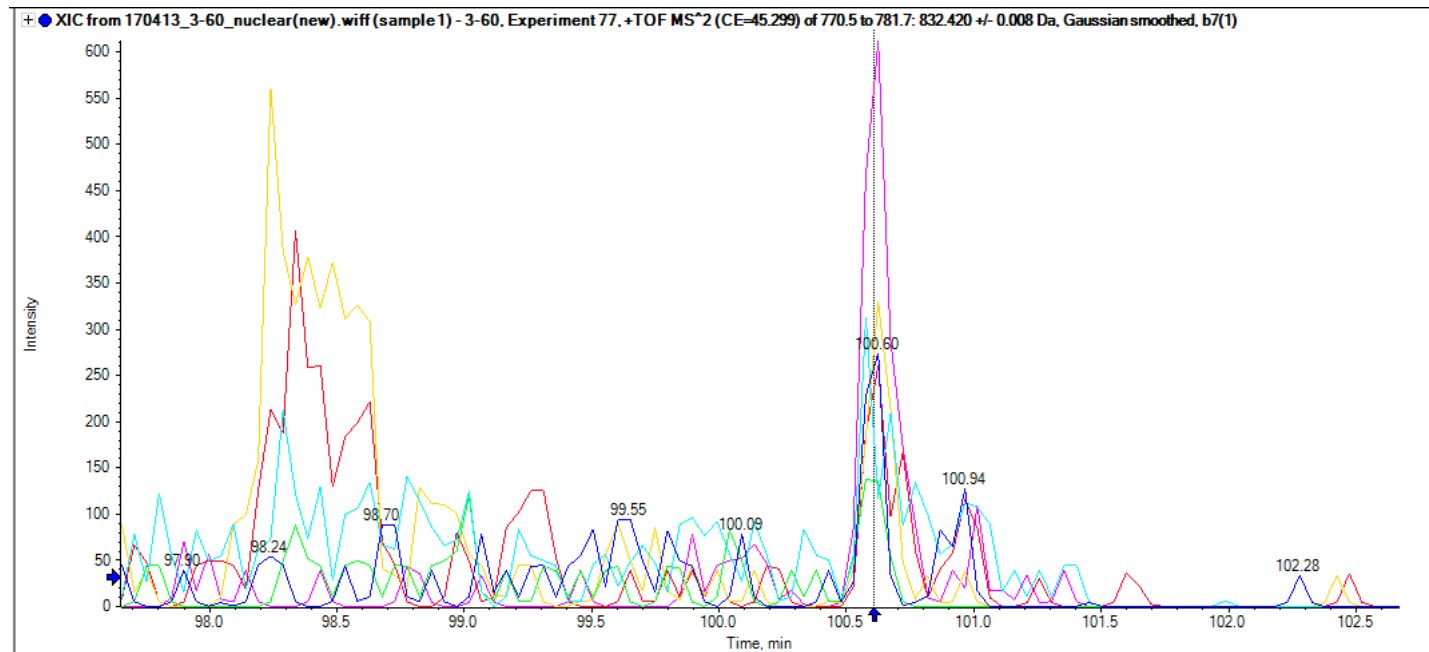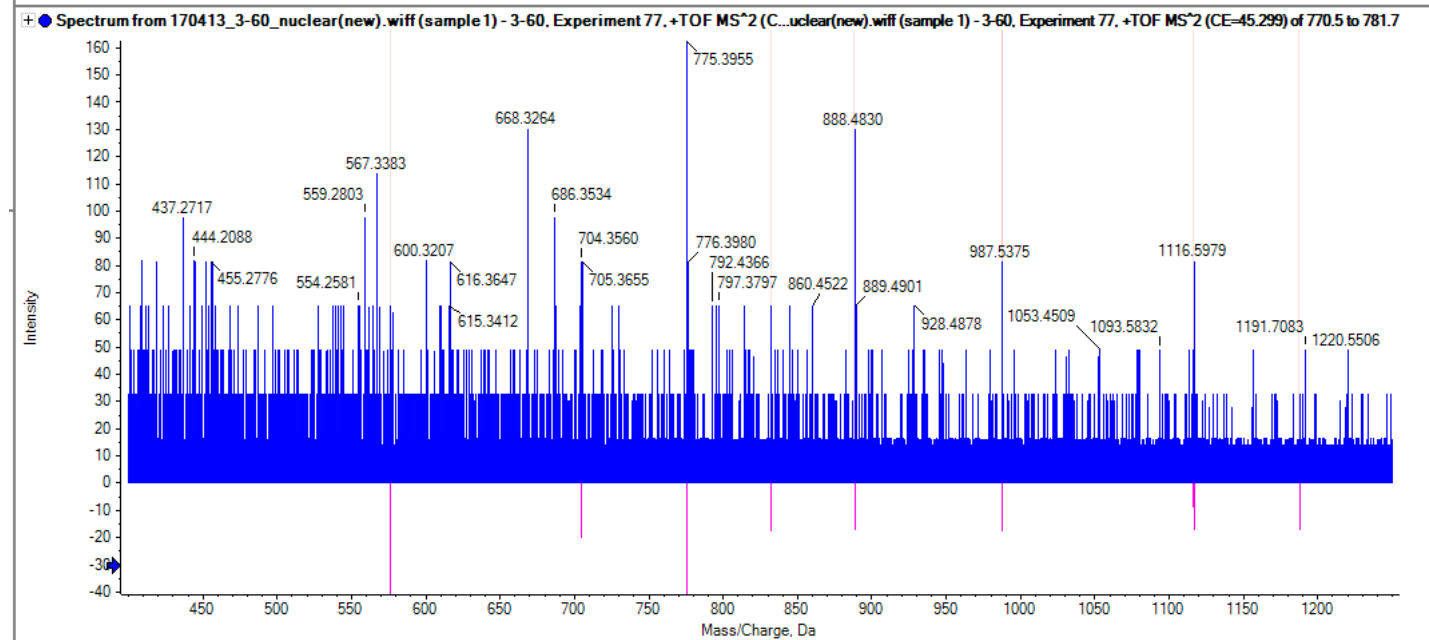

sp|Q96E40|SACA9\_HUMAN

TLVSQSNDLSSLR

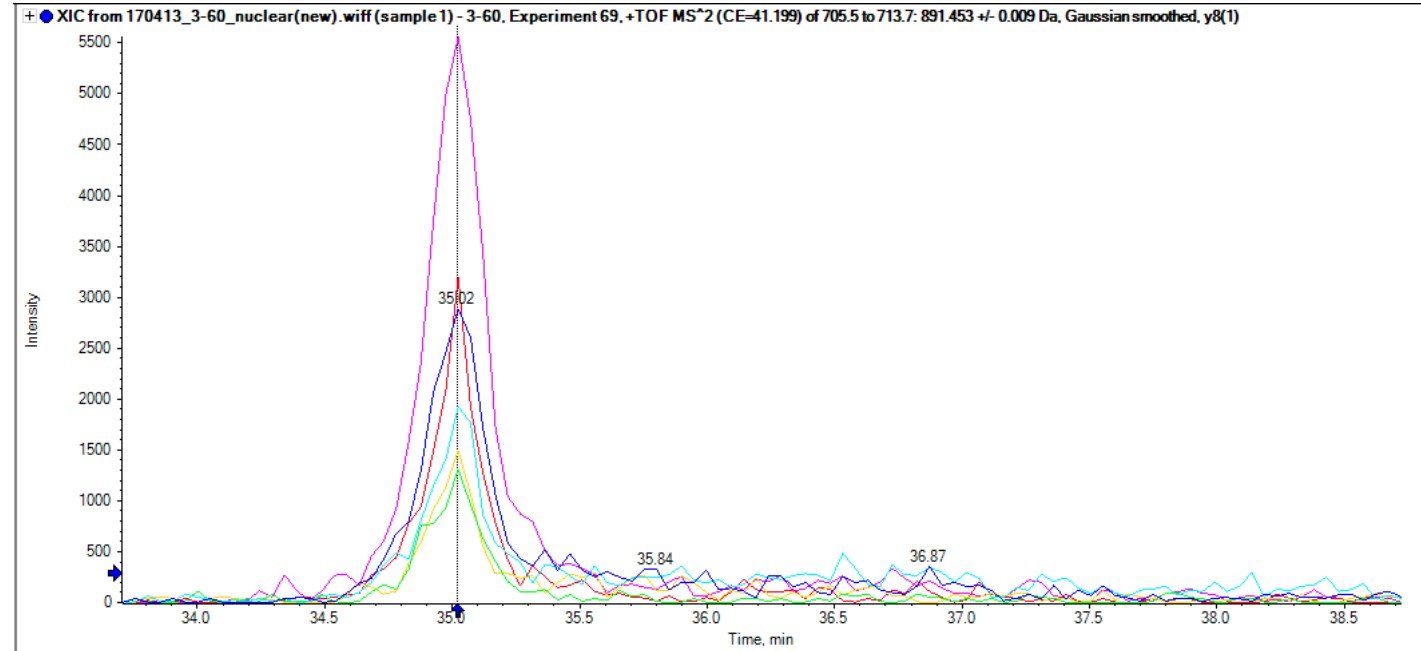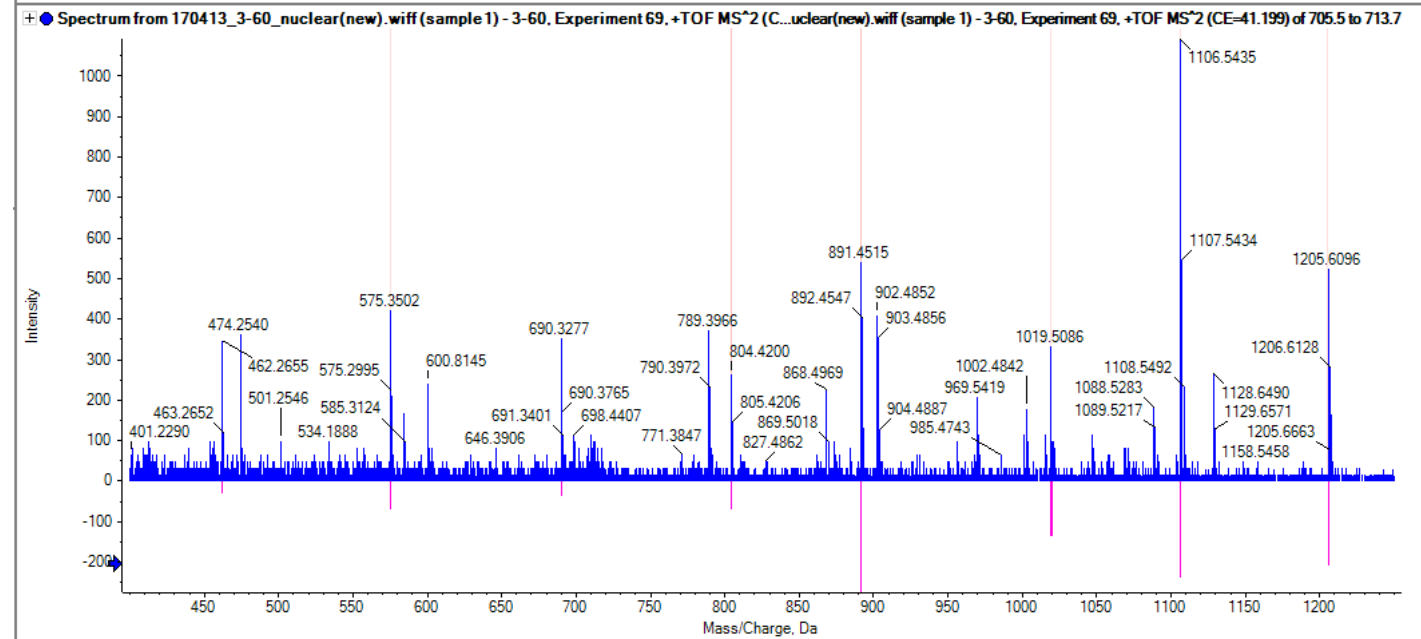

sp|Q8WVD3|RN138\_HUMAN

ALDLENIMR

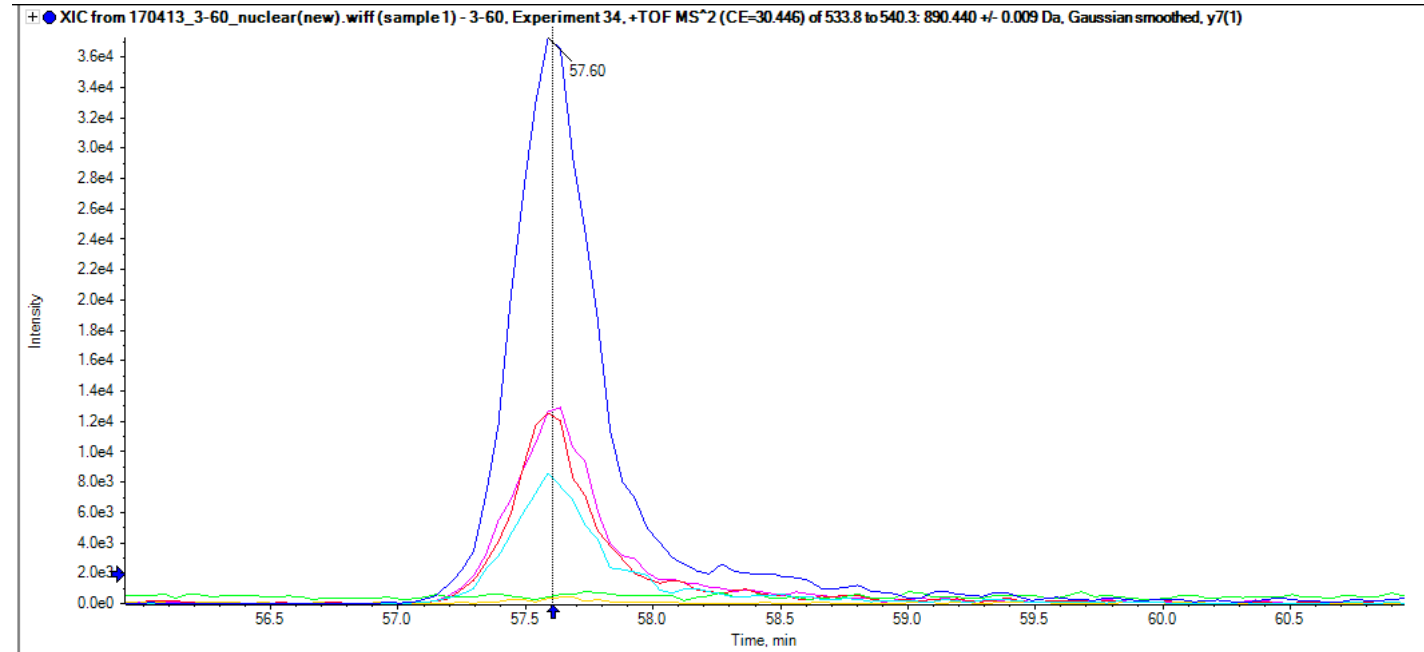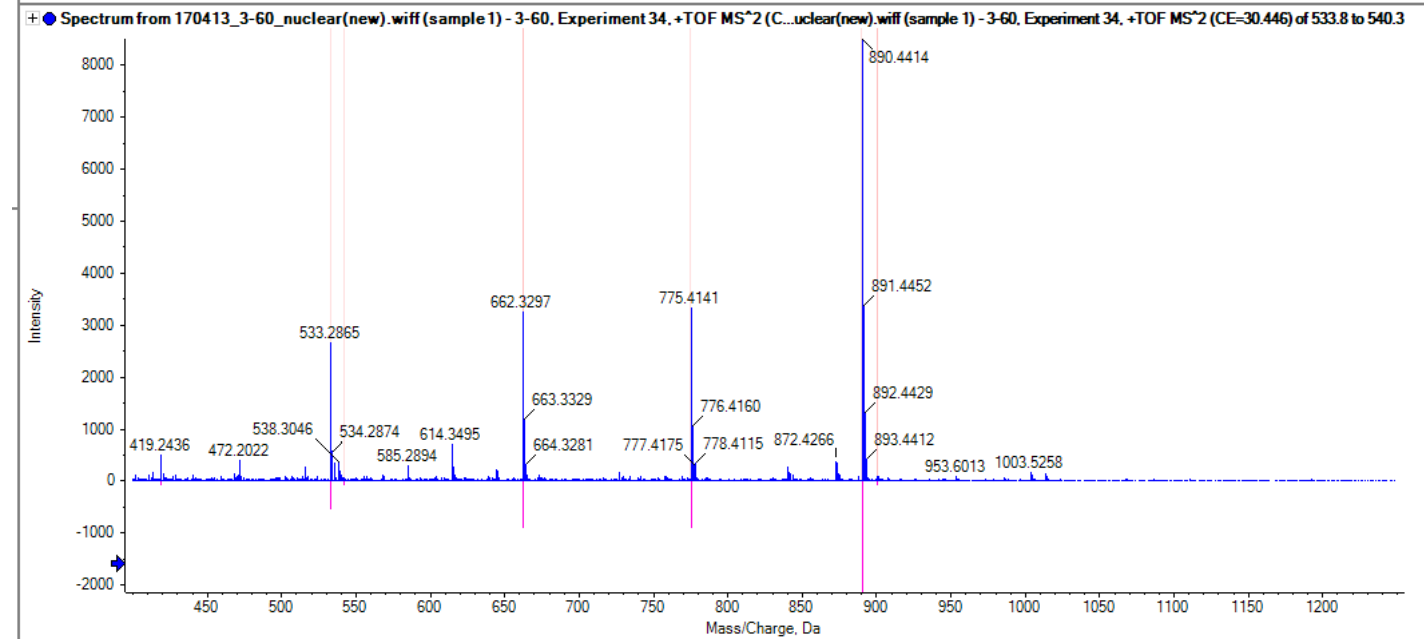

sp|O00231|PSD11\_HUMAN

TGQAAELGGLLK

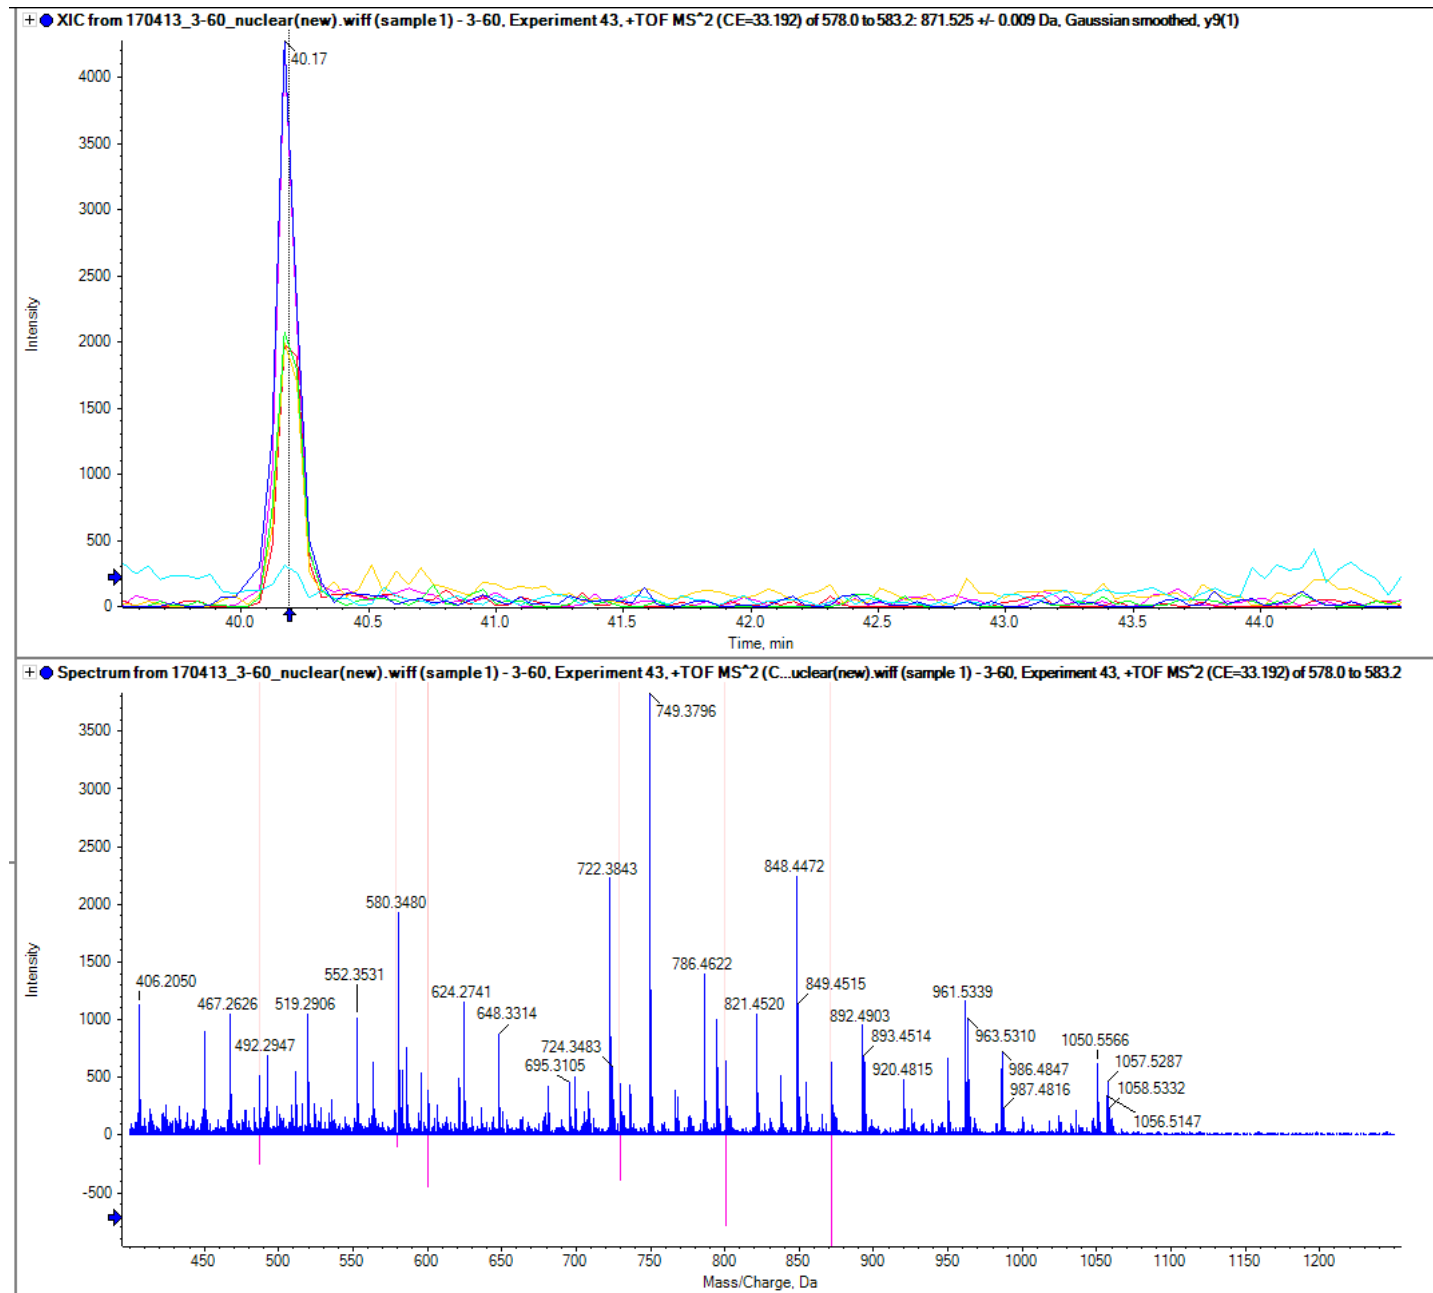

sp|P35237|SPB6\_HUMAN

FKLEESYDMESVLR

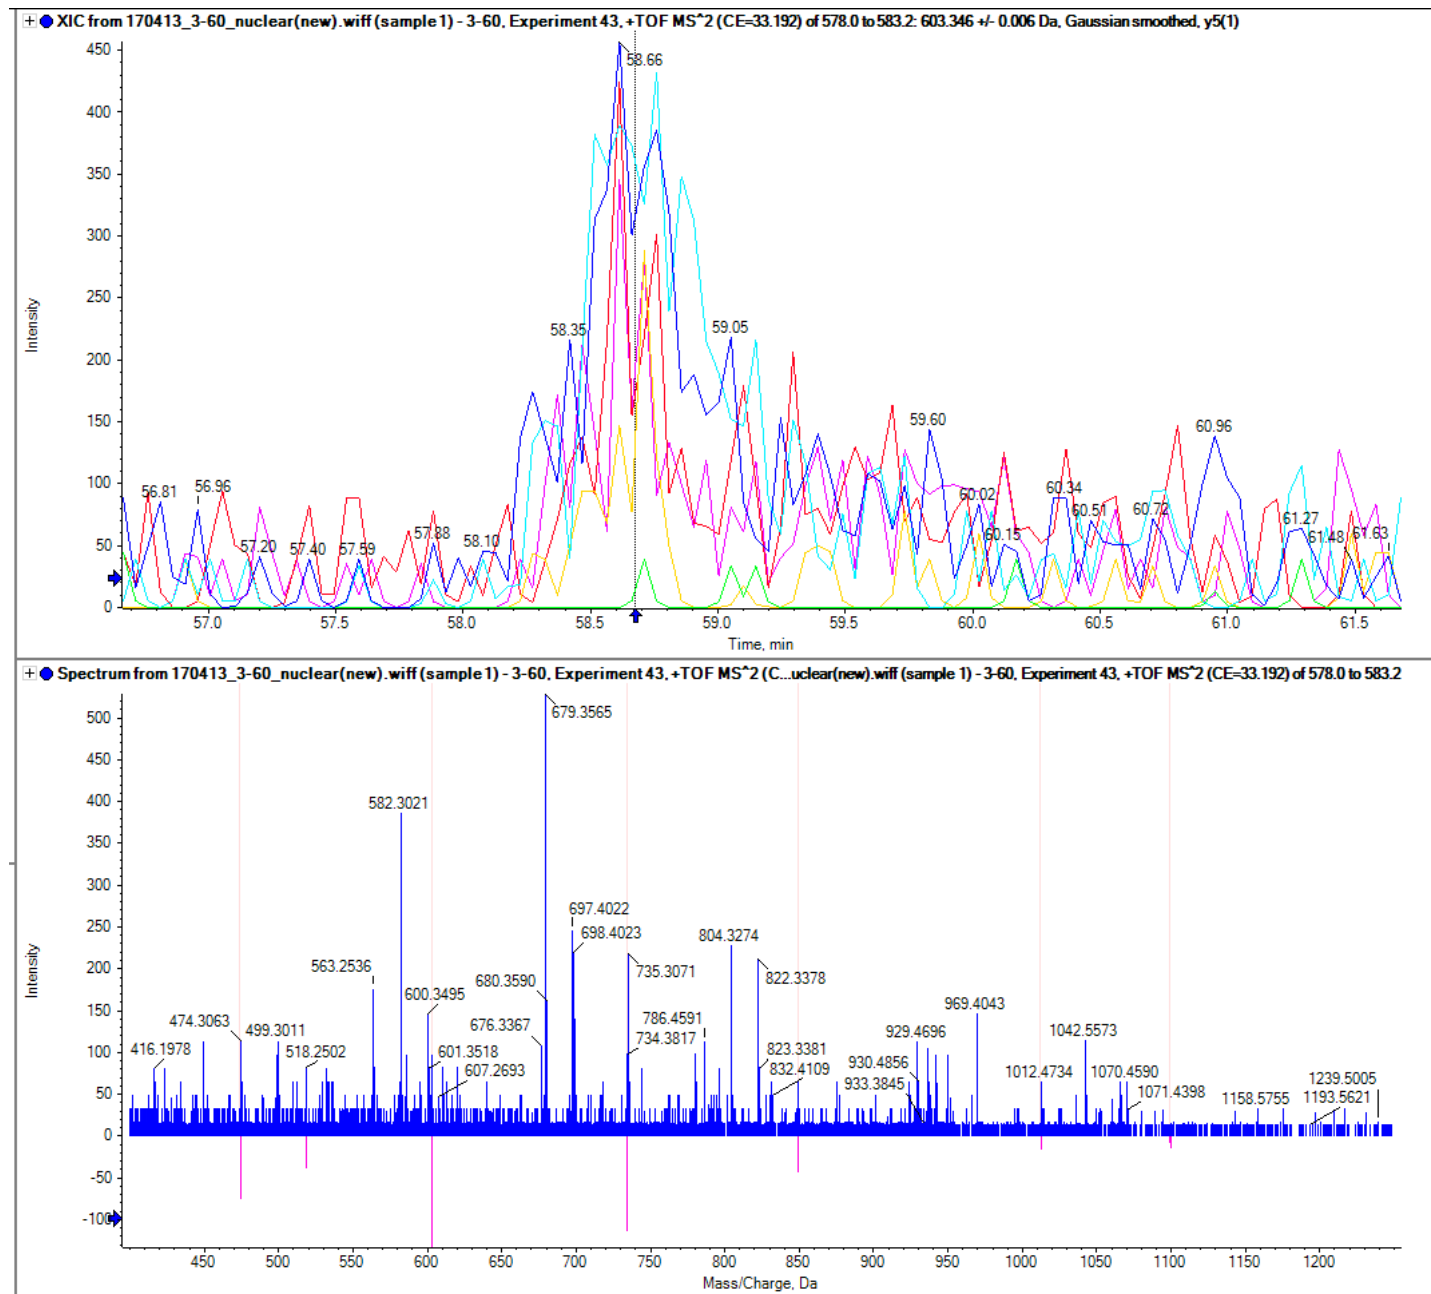

sp|Q9Y657|SPIN1\_HUMAN

VSALEVLPRD

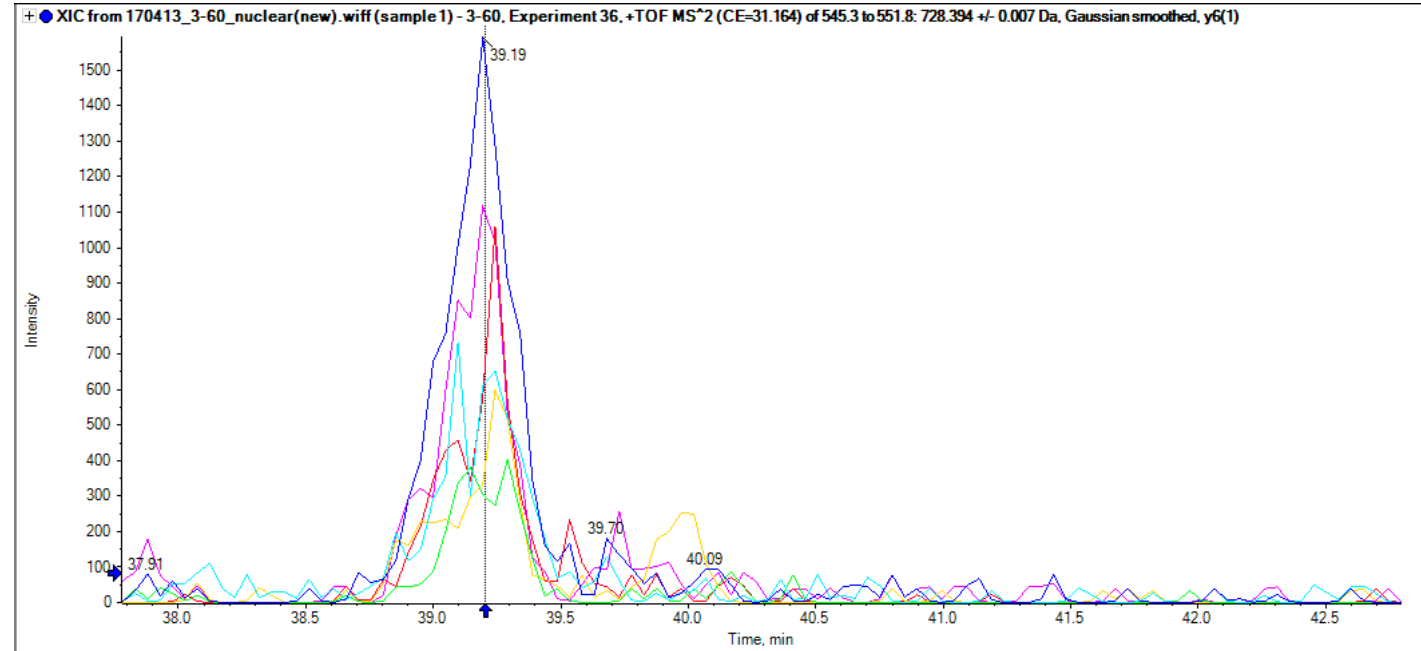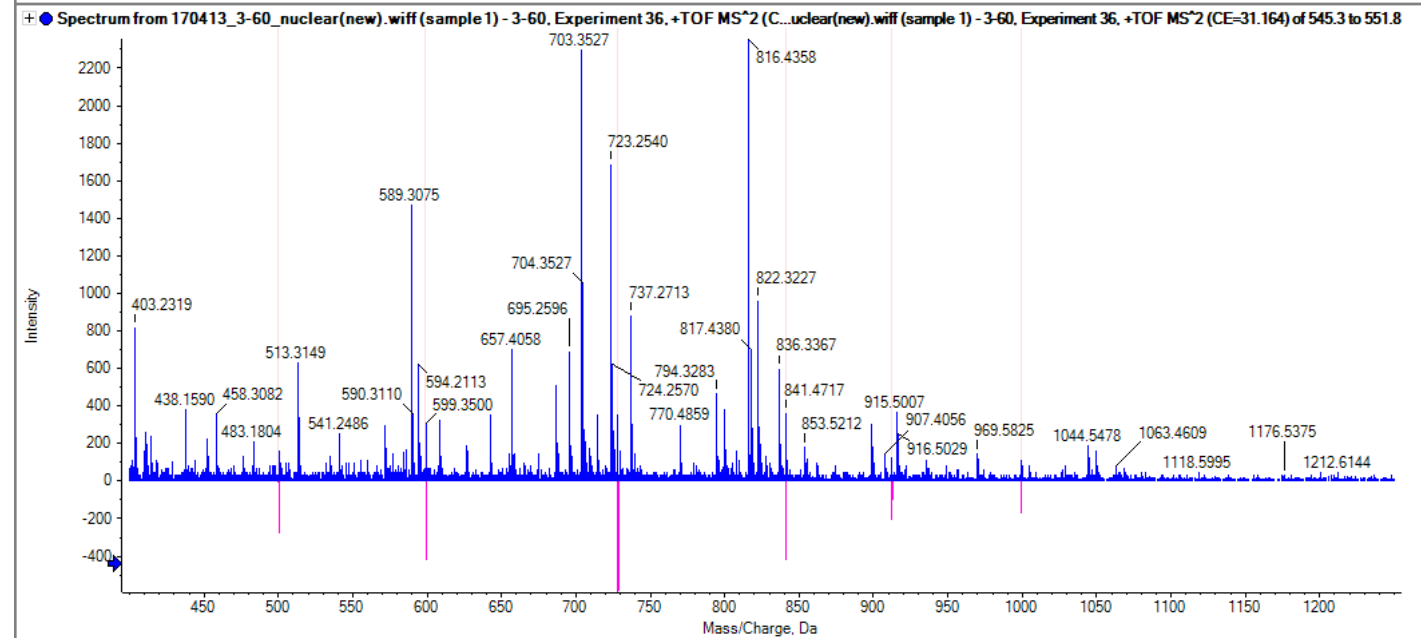

sp|Q9NZC3|GDE1\_HUMAN

GGSHDAPENTLAAIR

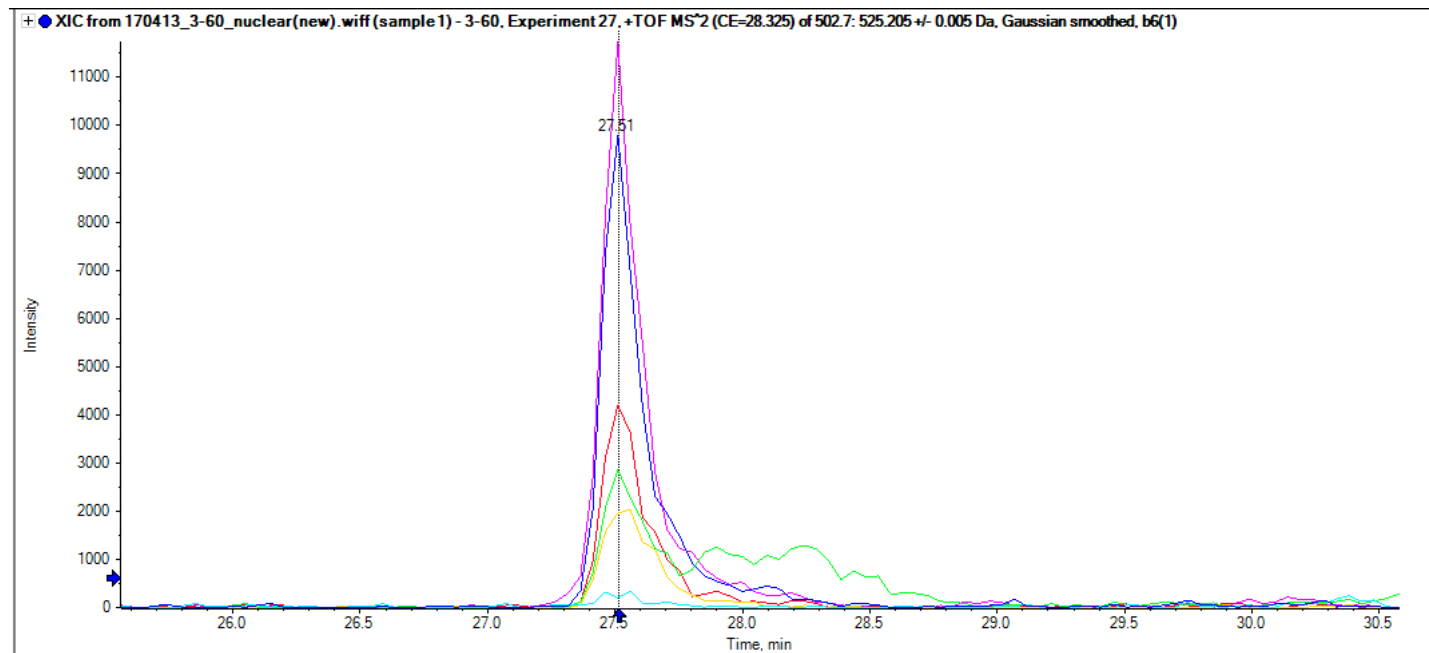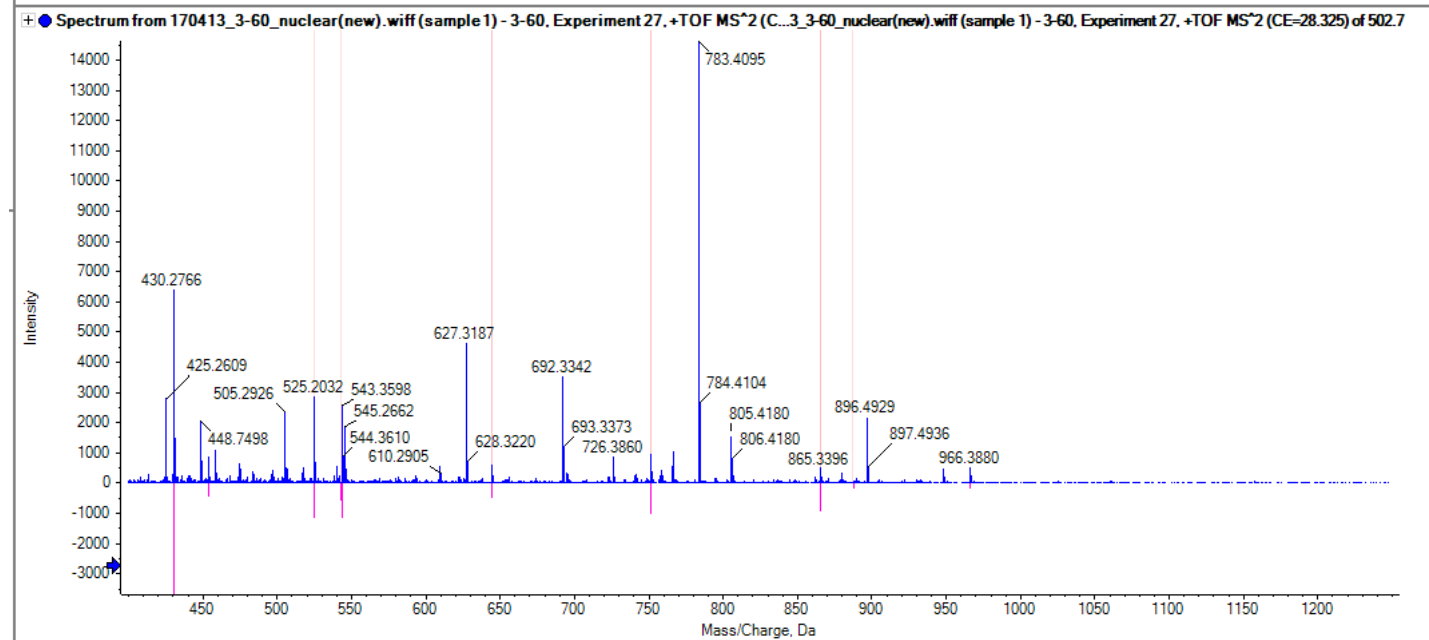



sp|Q96JQ2|CLMN\_HUMAN

ALLAWVQR

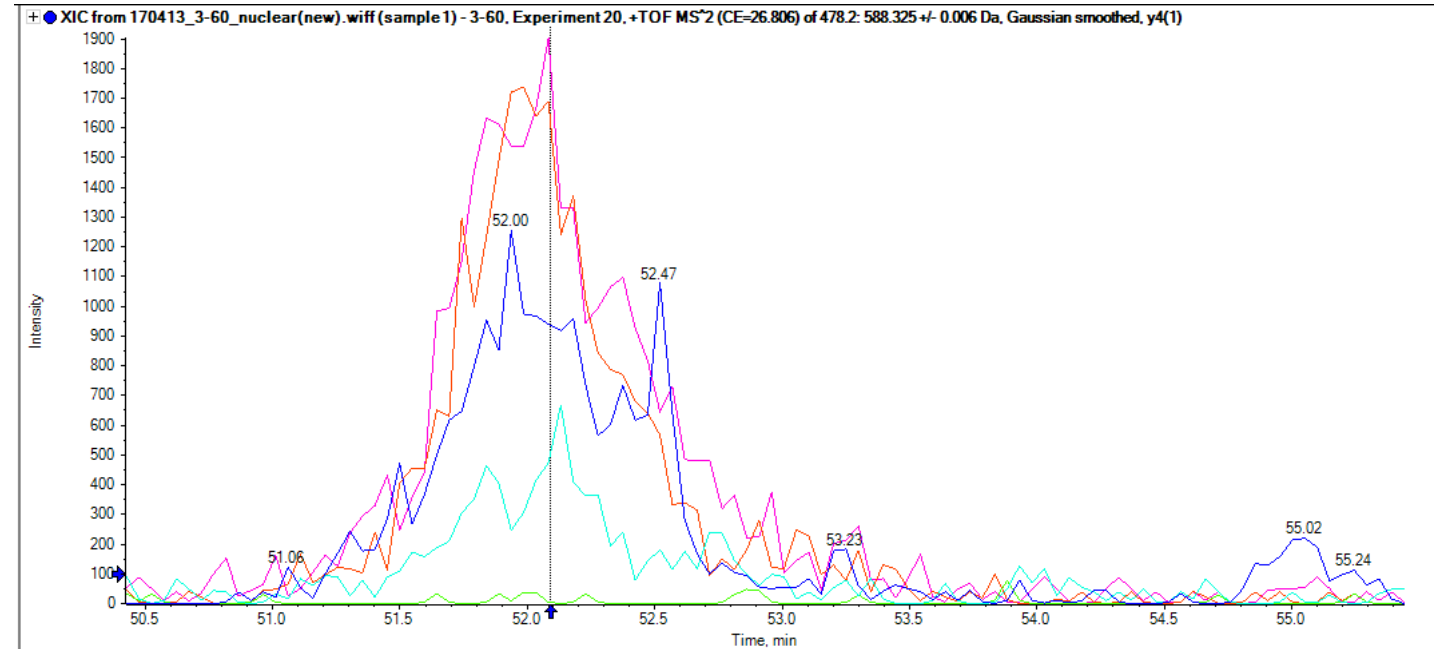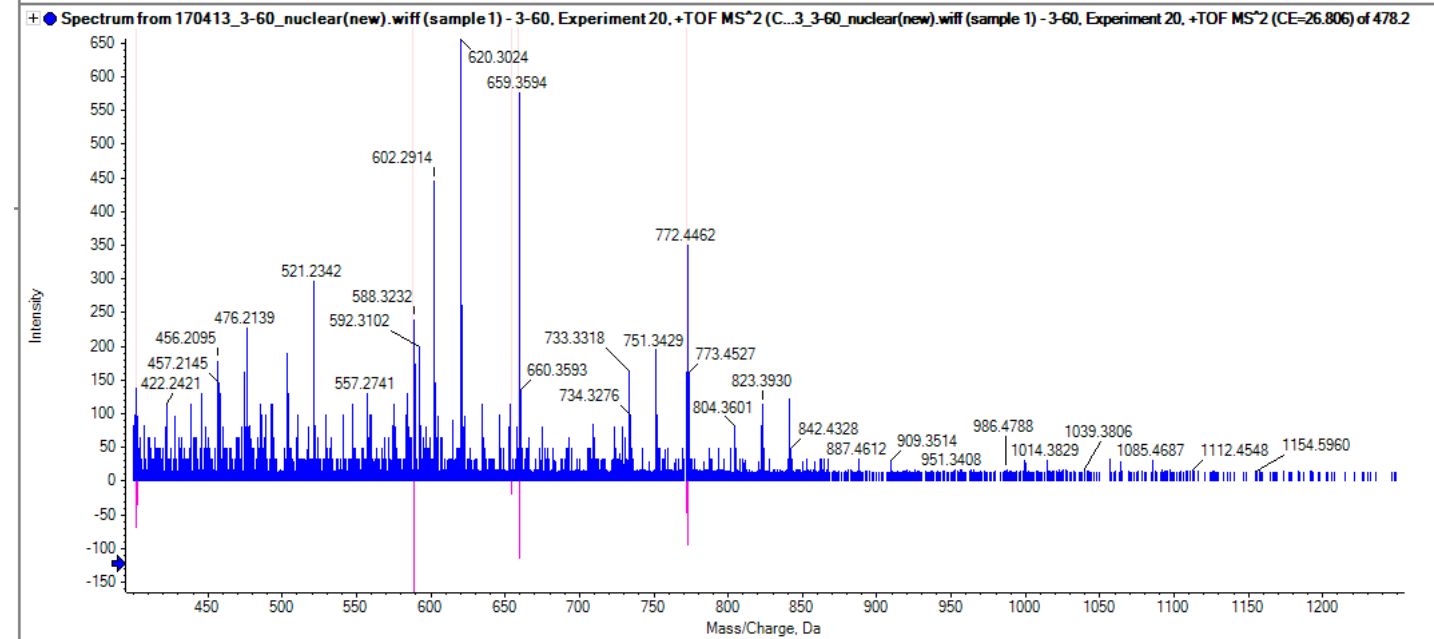

sp|Q9UI14|PRAF1\_HUMAN

ATIRPWSTFVDQQR

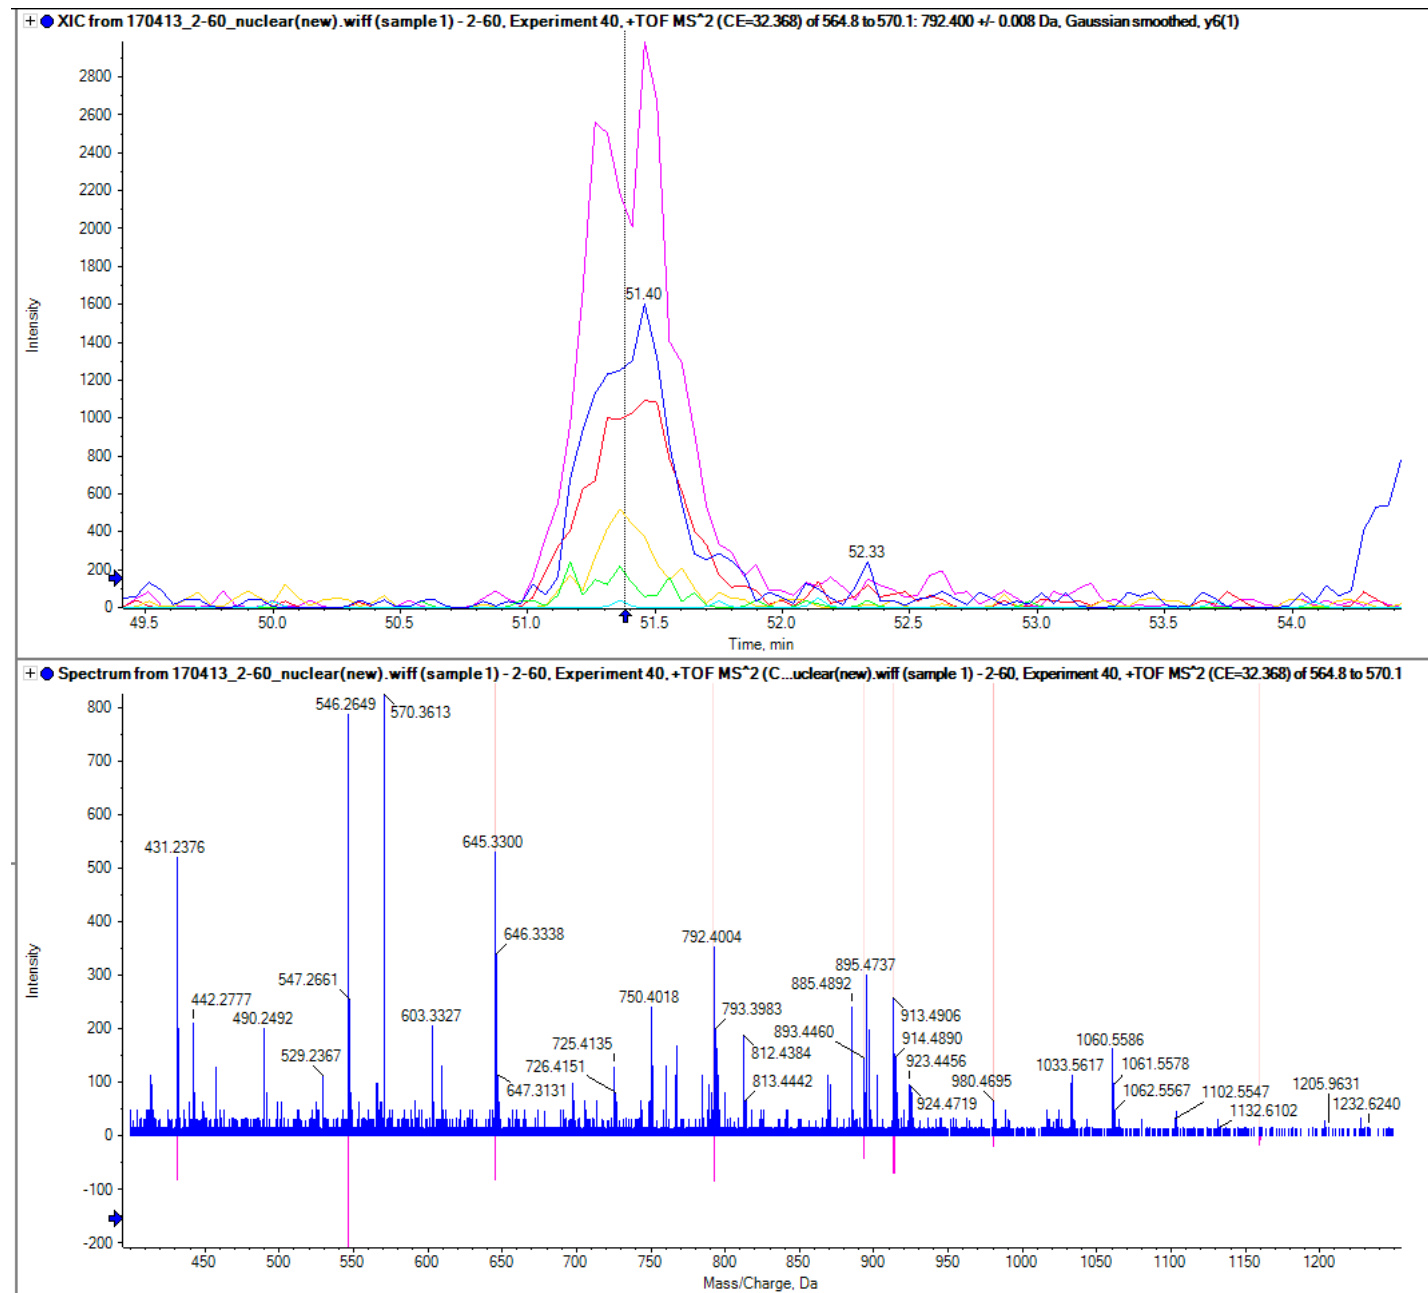

sp|P62241|RS8\_HUMAN

ISSLLEEQFQQGK

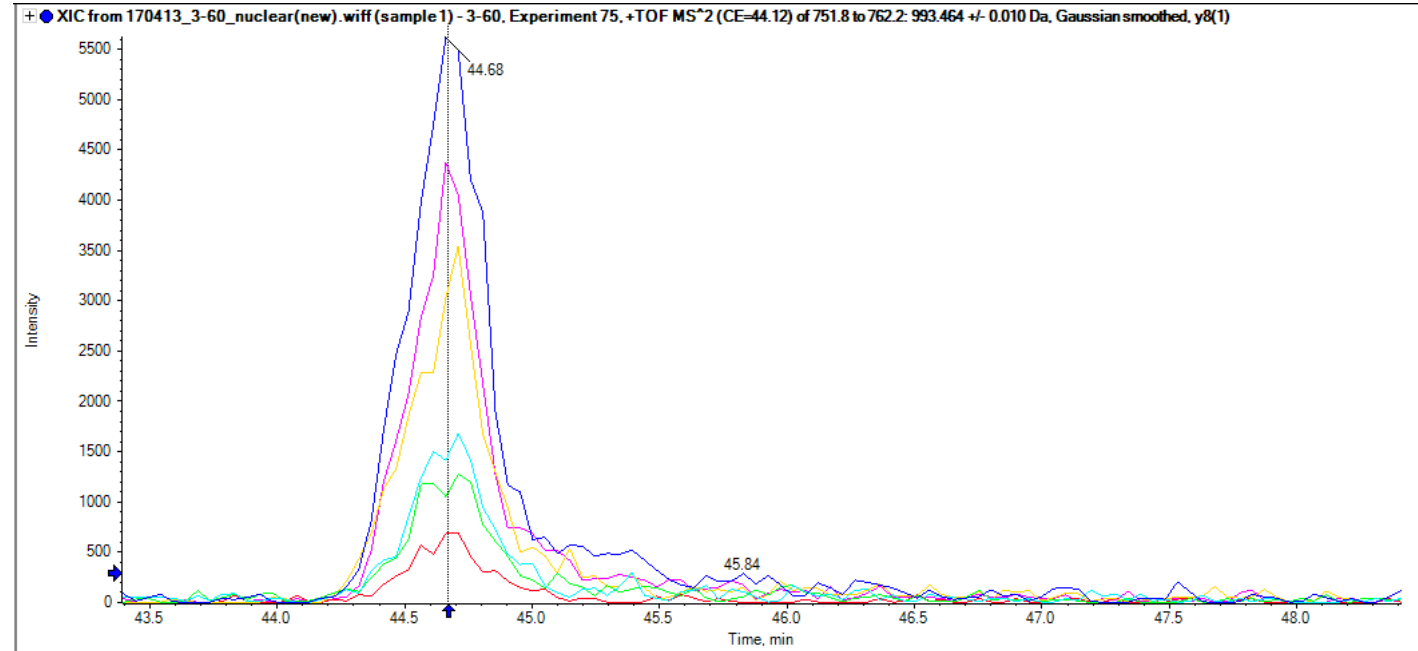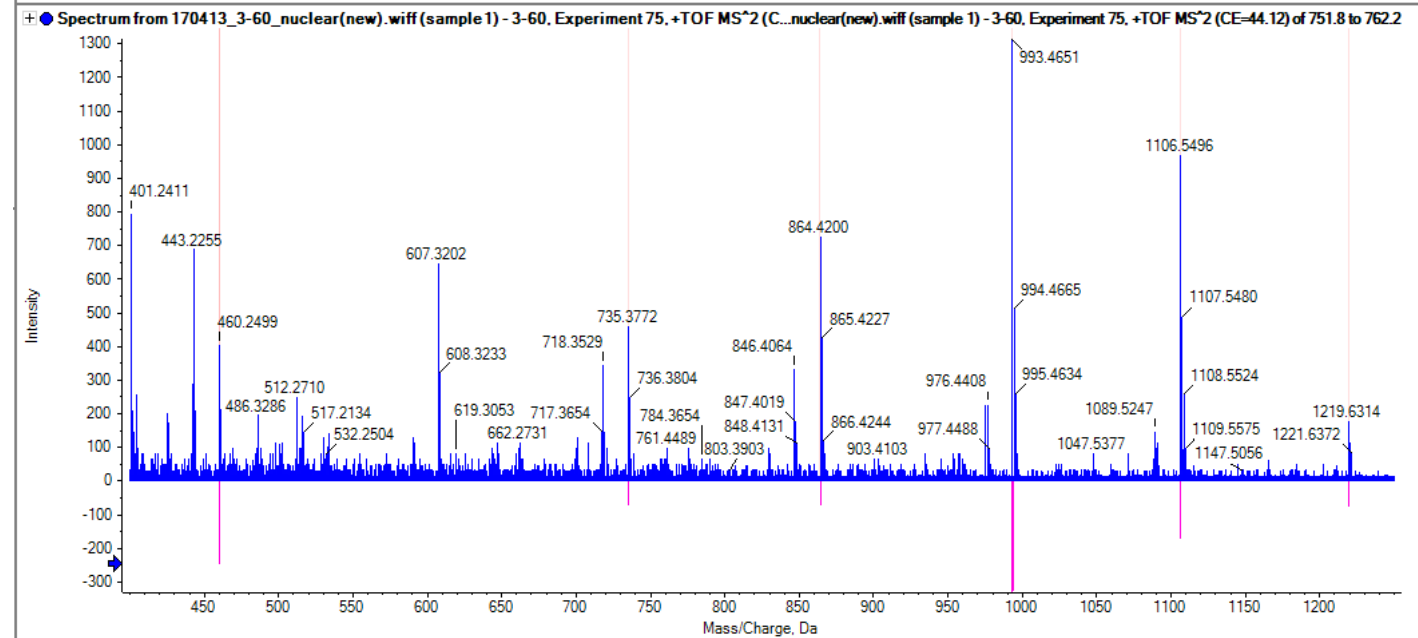

sp|Q99436|PSB7\_HUMAN

LPYVTMGSGSLAAMAVFEDK

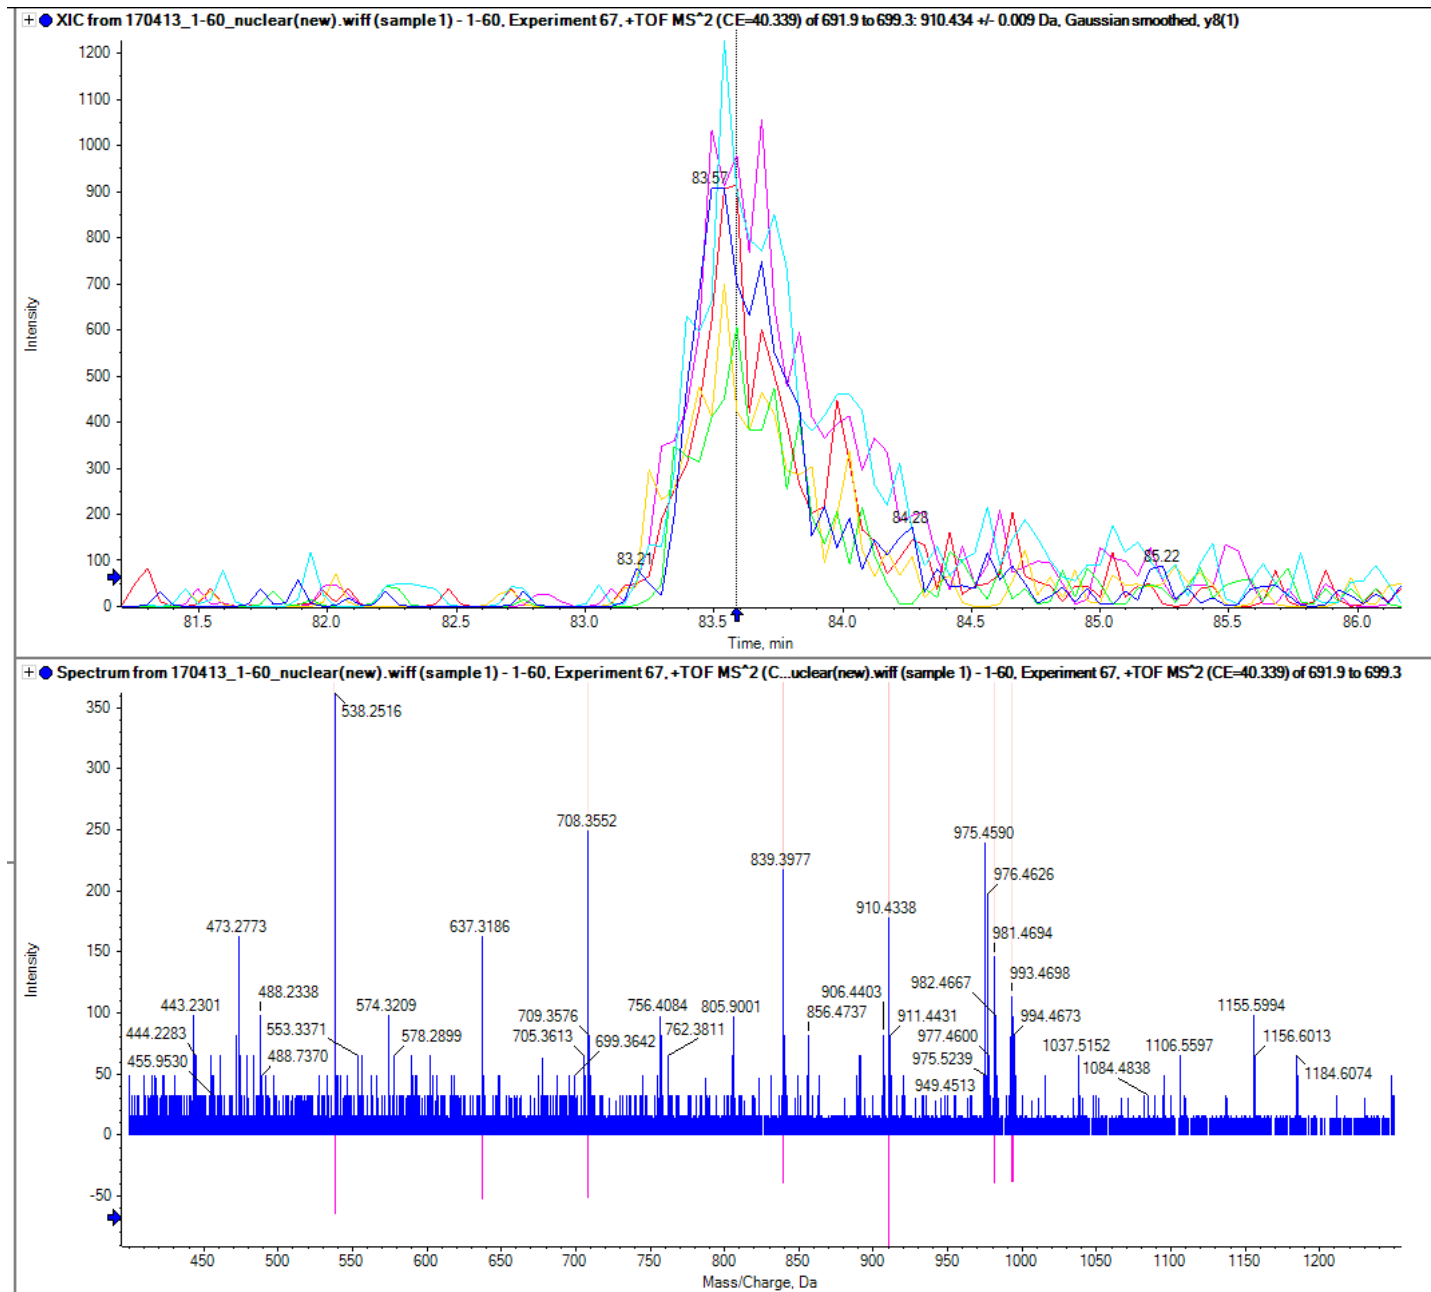

sp|P51665|PSMD7\_HUMAN

VVVHPLVLLSVVDHFNR

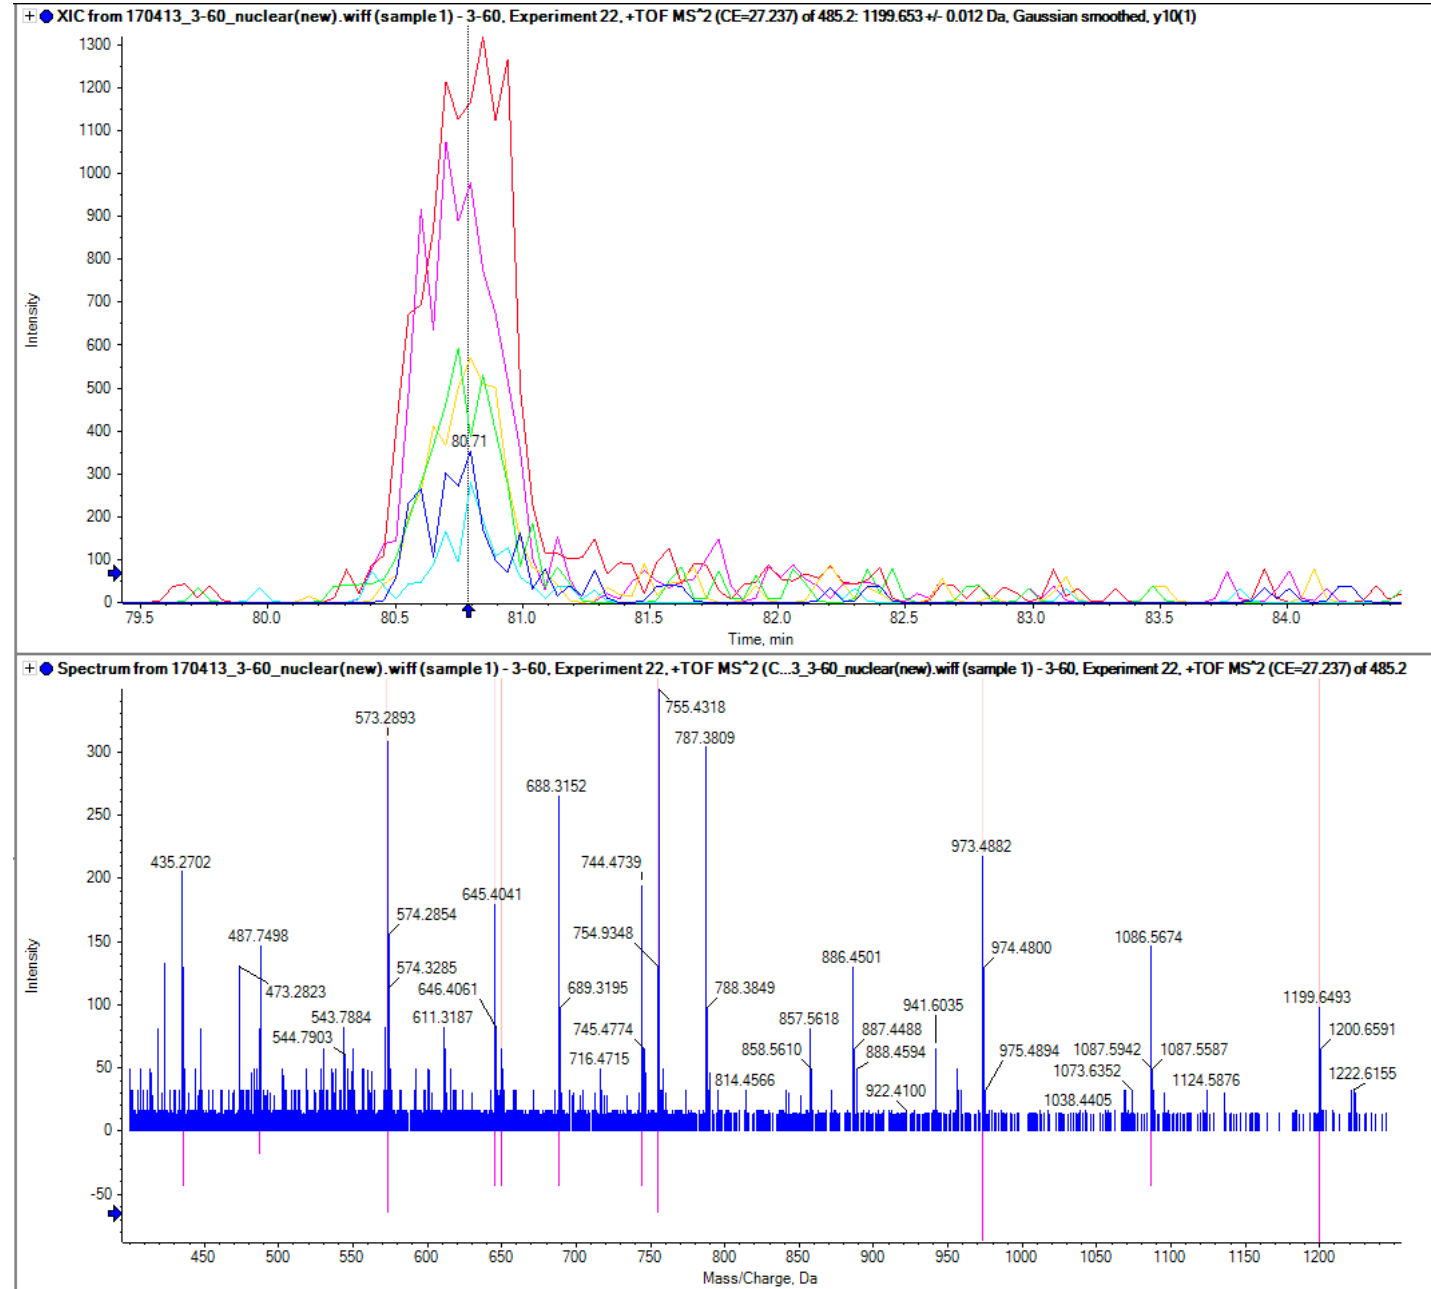

sp|Q5W111|SPRY7\_HUMAN

VNLNQIPLGR

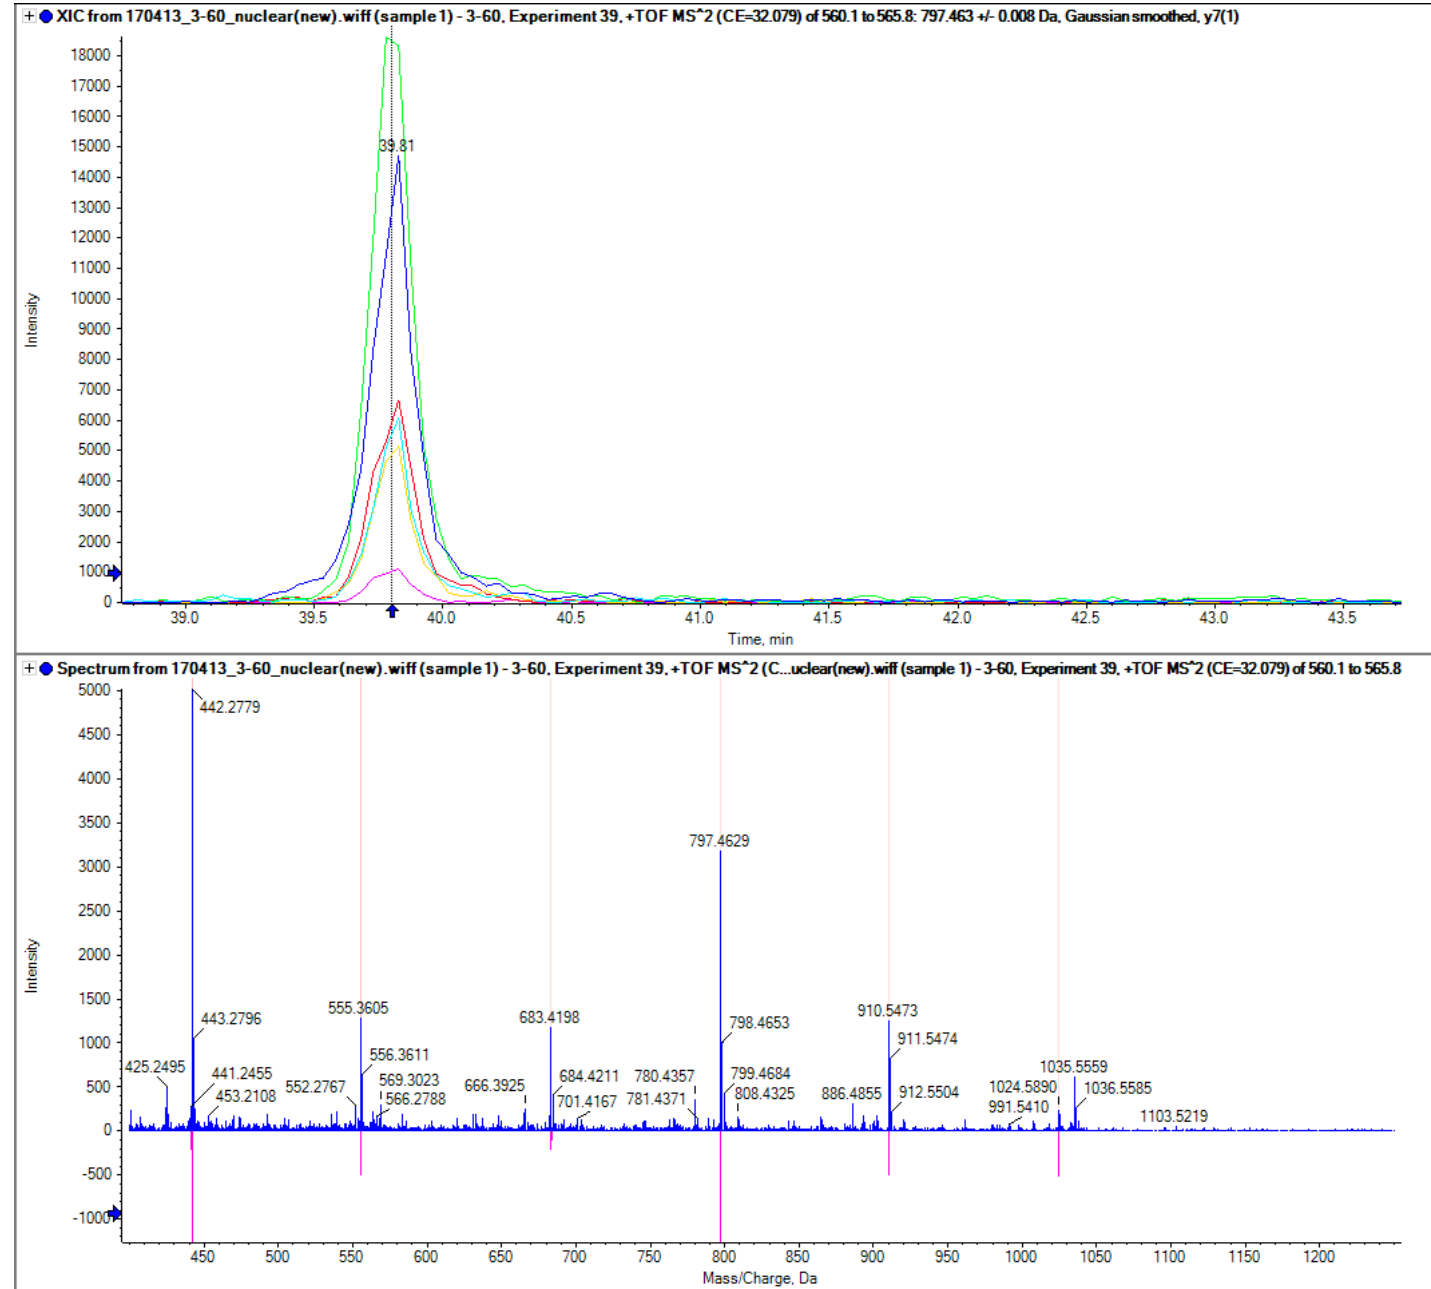

sp|Q9UPP1|PHF8\_HUMAN

STTPMAPGVFLTQR

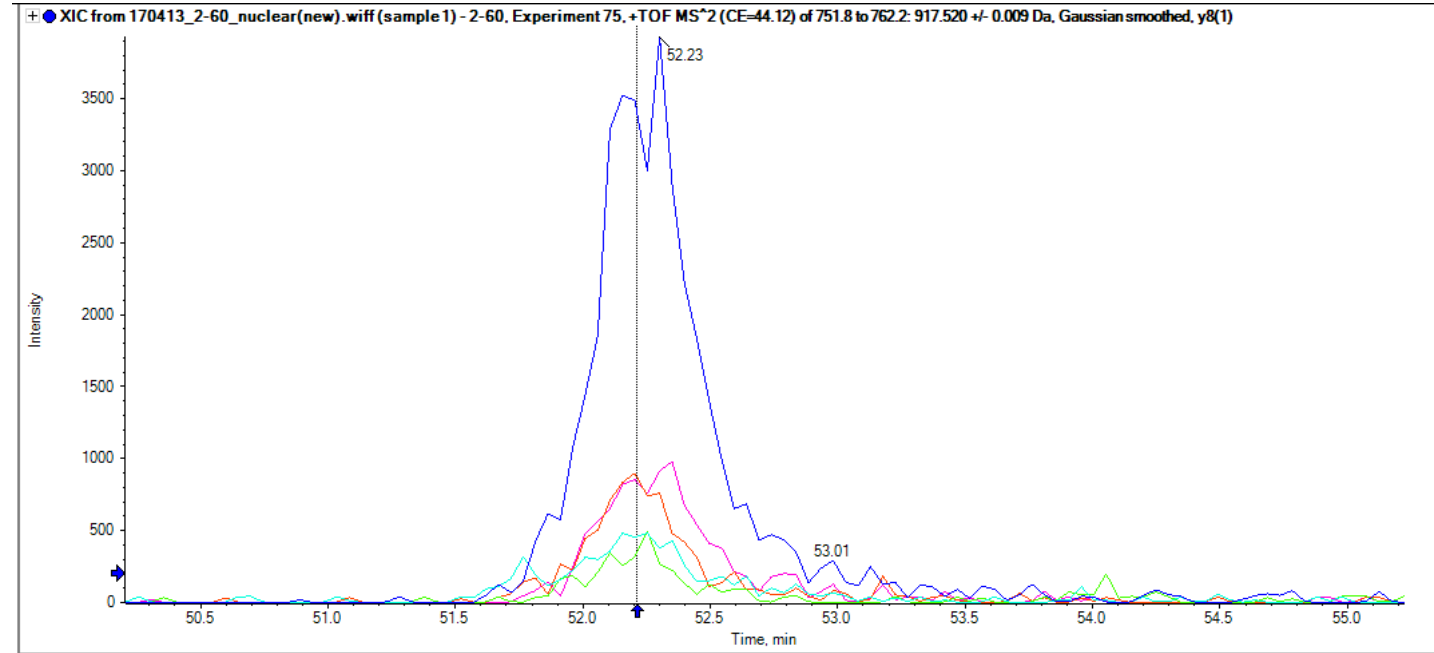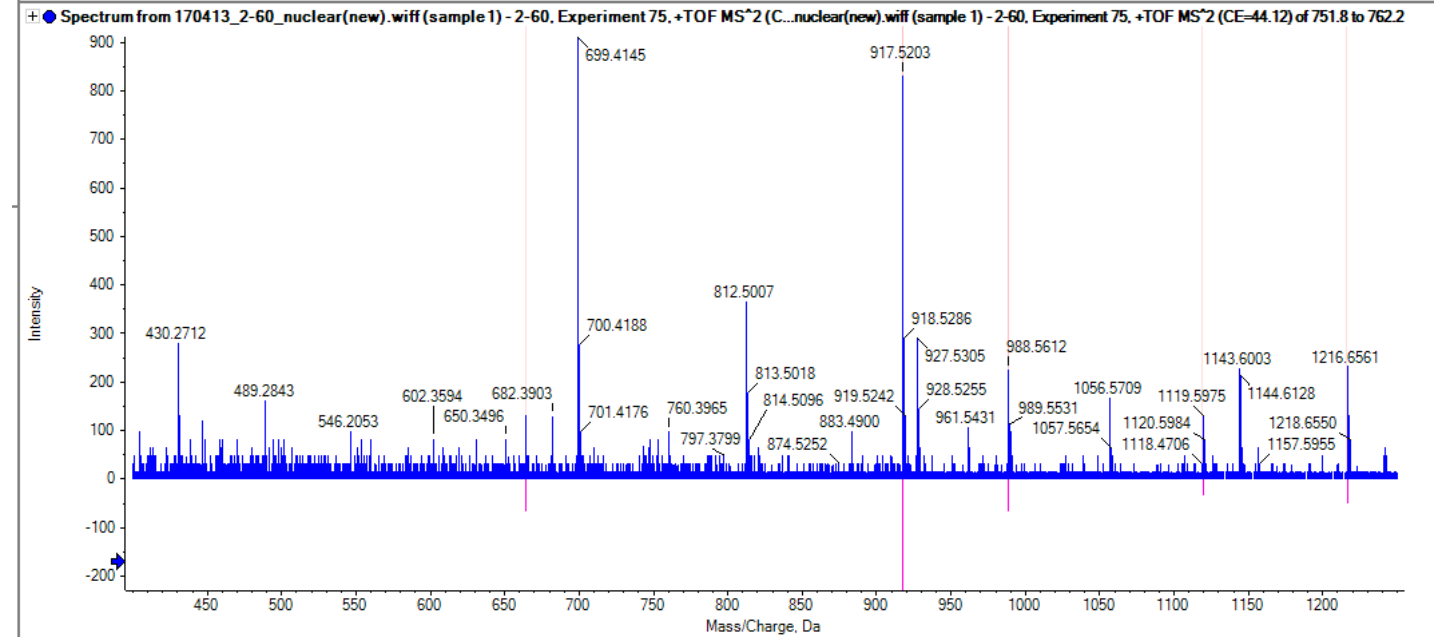

sp|A1A519|F170A\_HUMAN

MEEVTLSEVVR

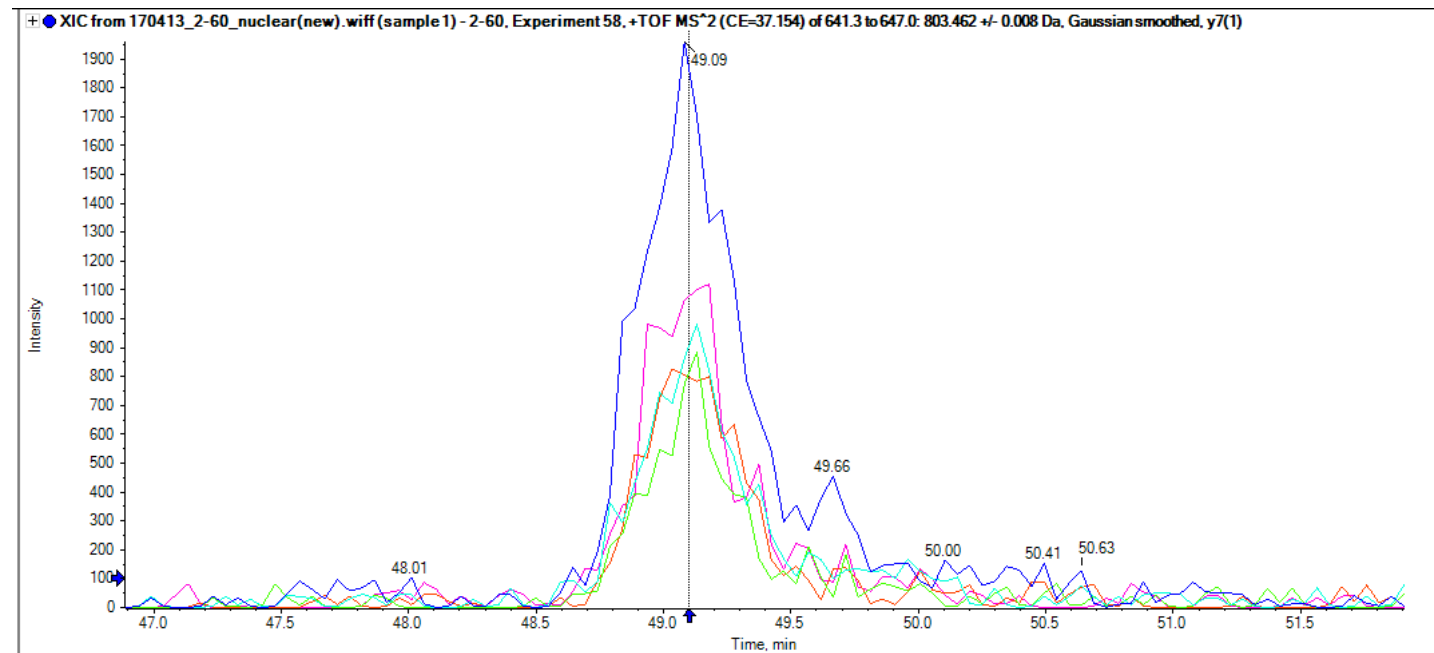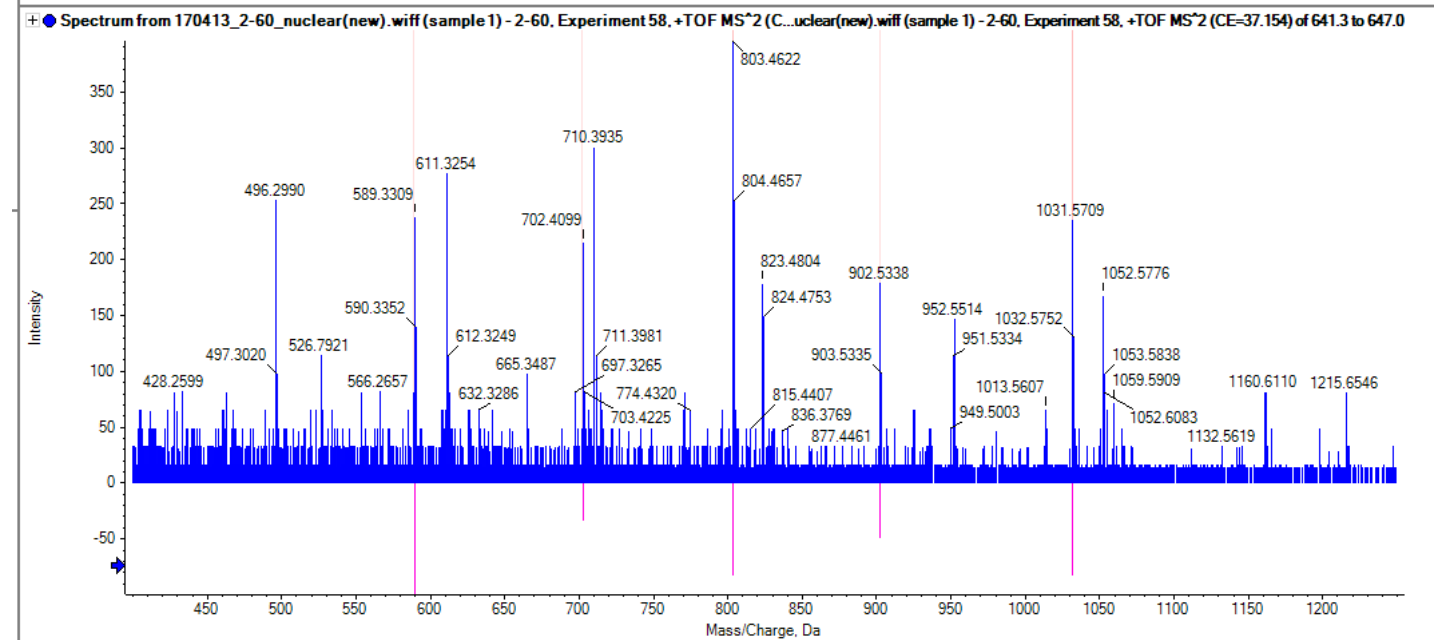



sp|P04075|ALDOA\_HUMAN

IGEHTPSALAIMENANVLAR

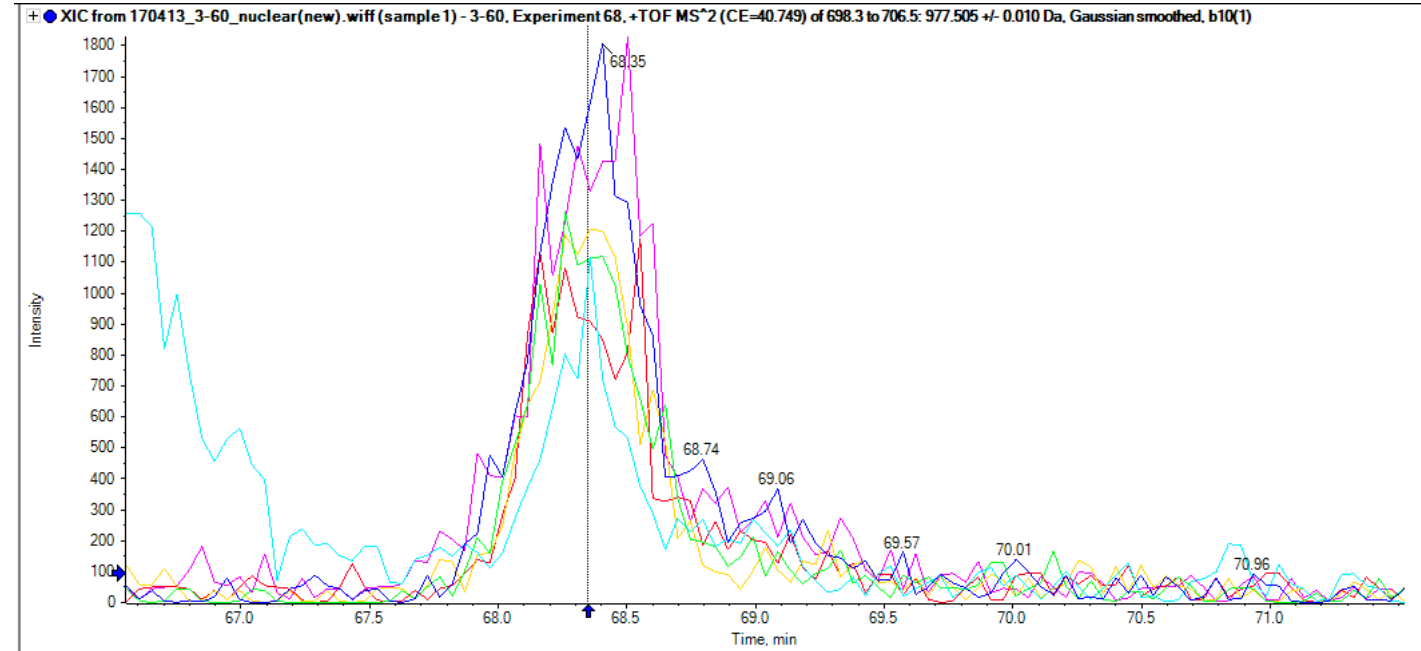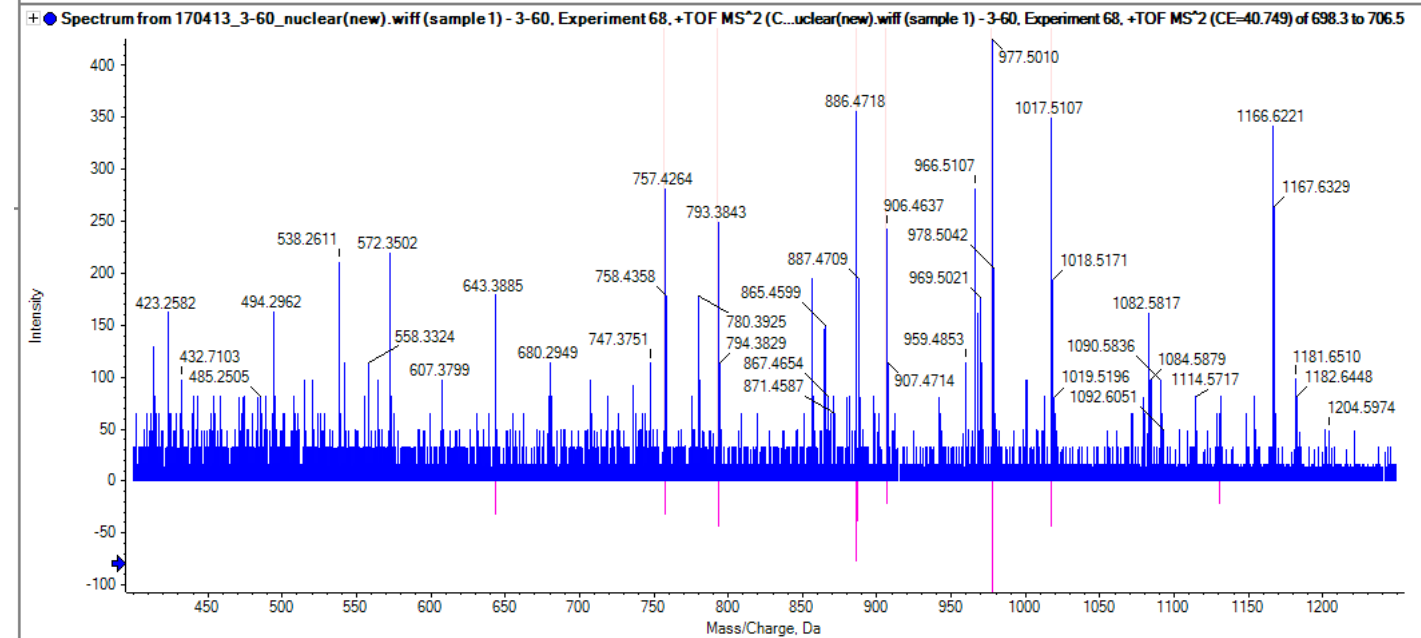

sp|Q9HAN9|NMNA1\_HUMAN

SNIHVVNEWIANDISSTK

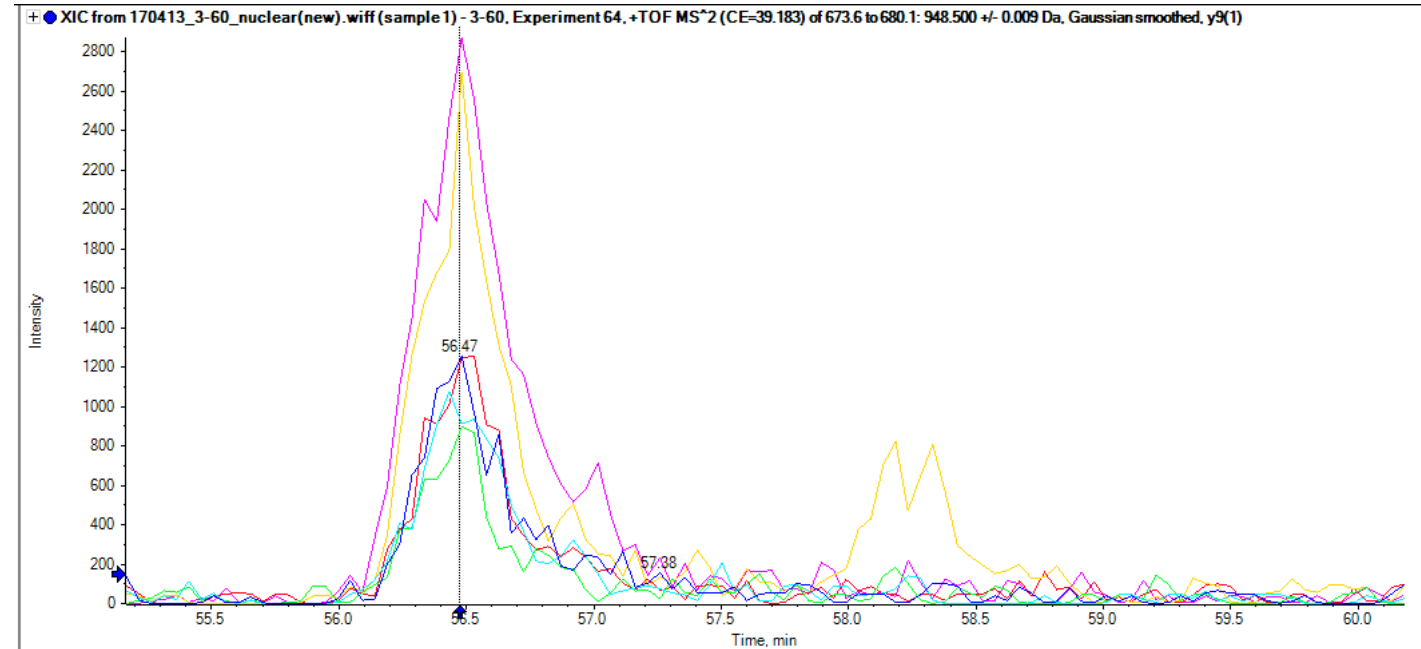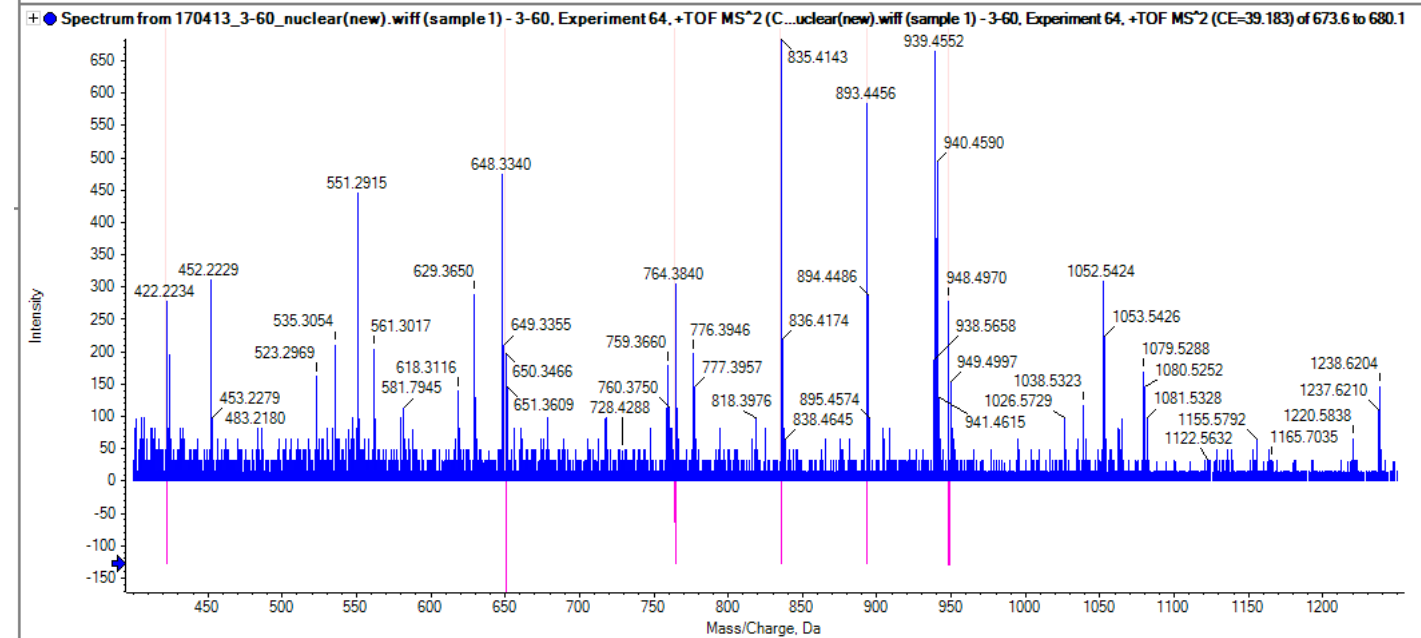

sp|Q96M98|PACRG\_HUMAN

RENIGDLIQETLEAFER

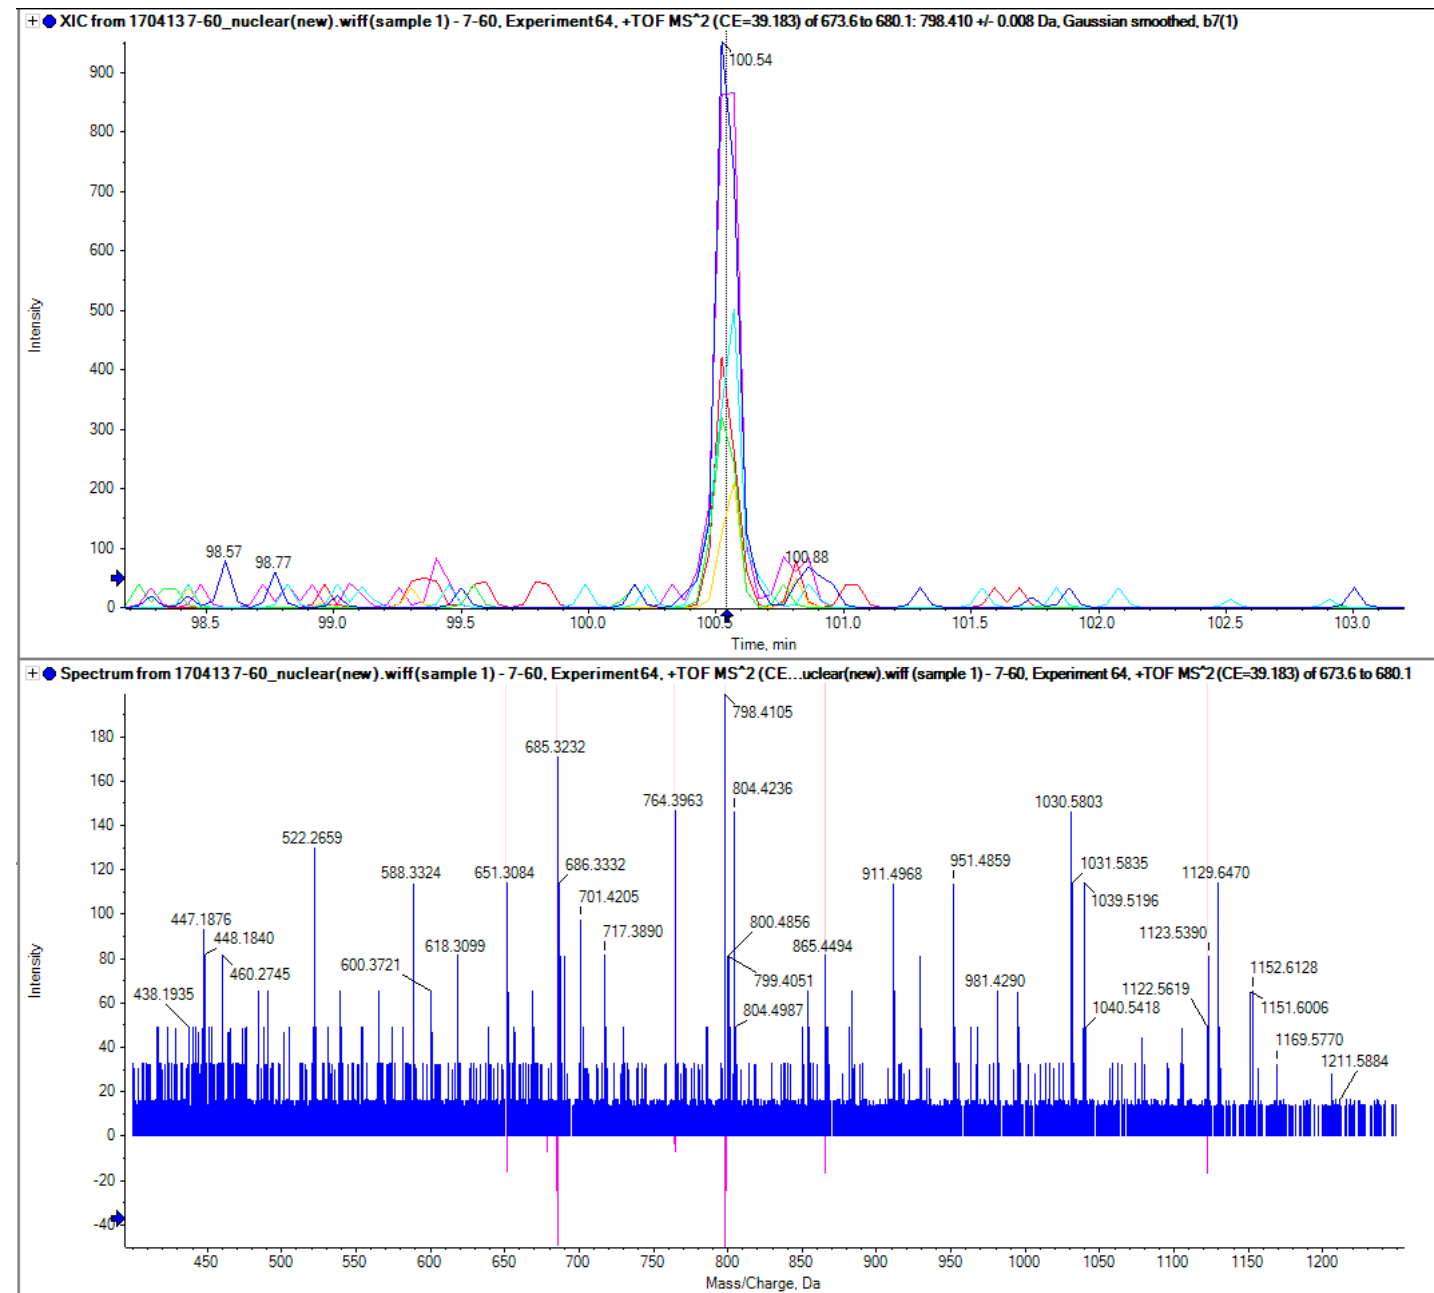

sp|P49189|AL9A1\_HUMAN

VSFTGSVPTGMK

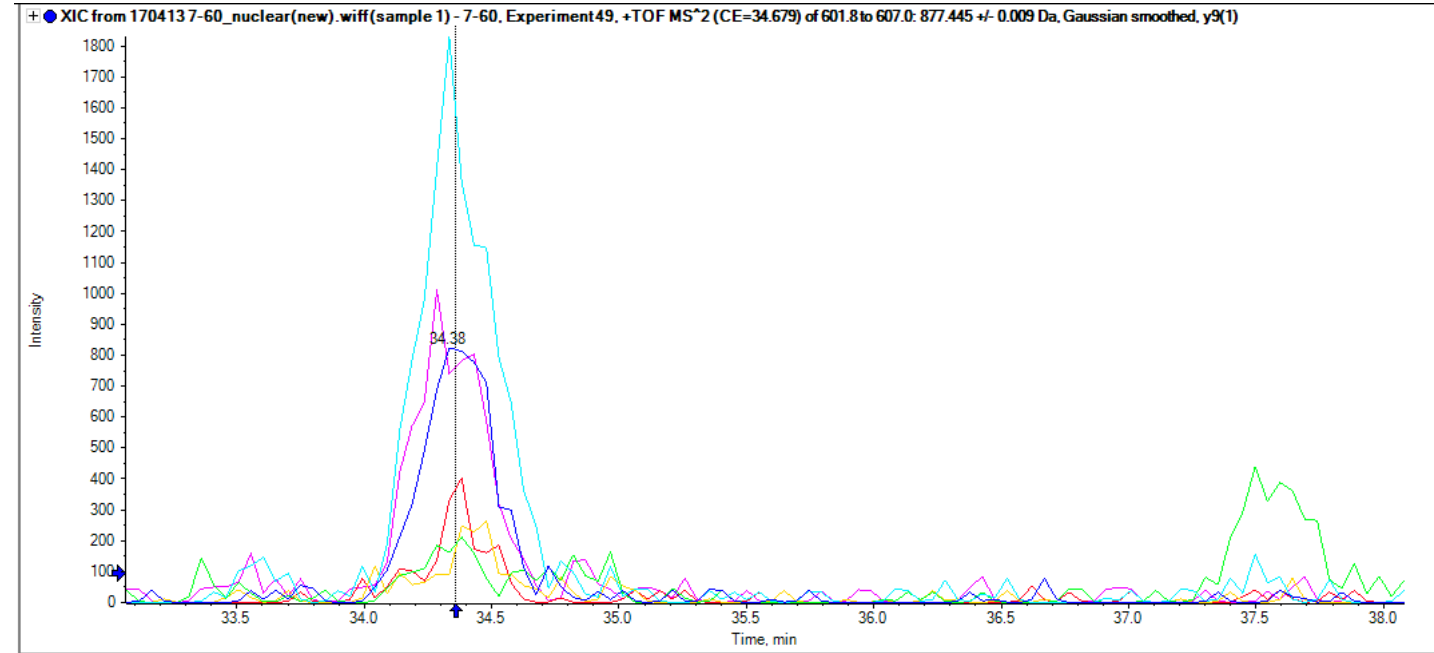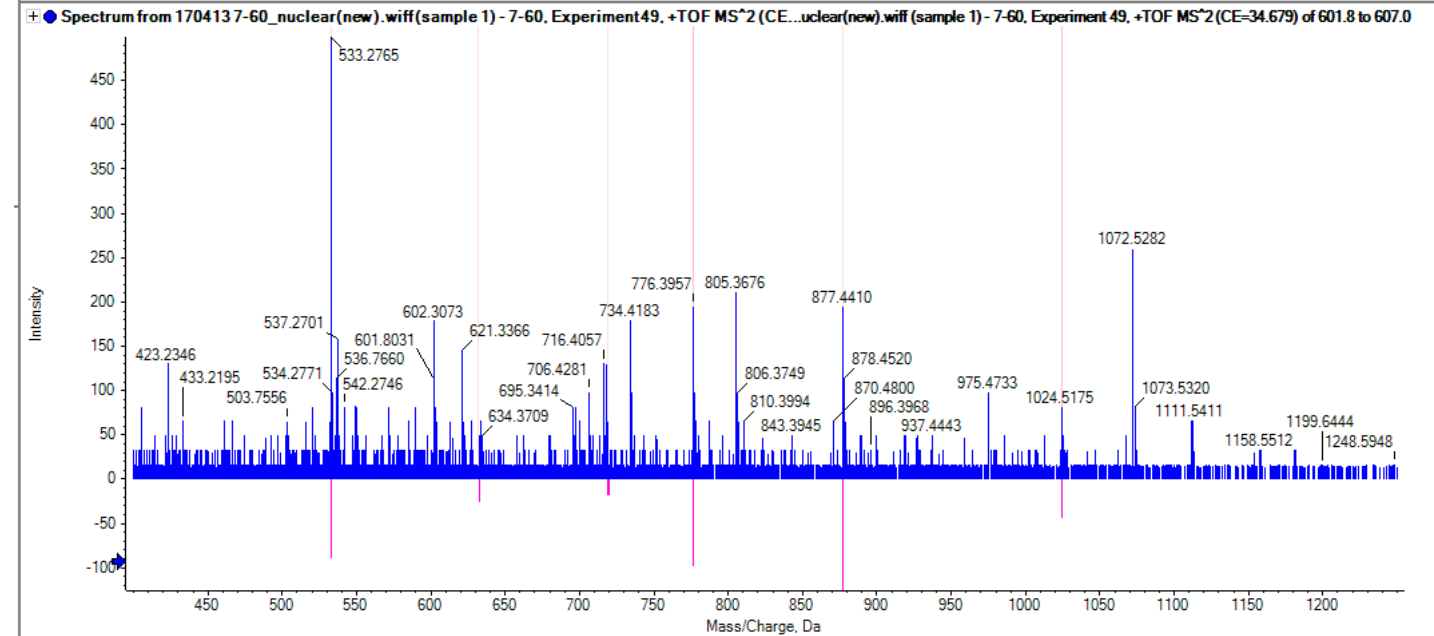

sp|P62314|SMD1\_HUMAN

NREPVQLETL SIR

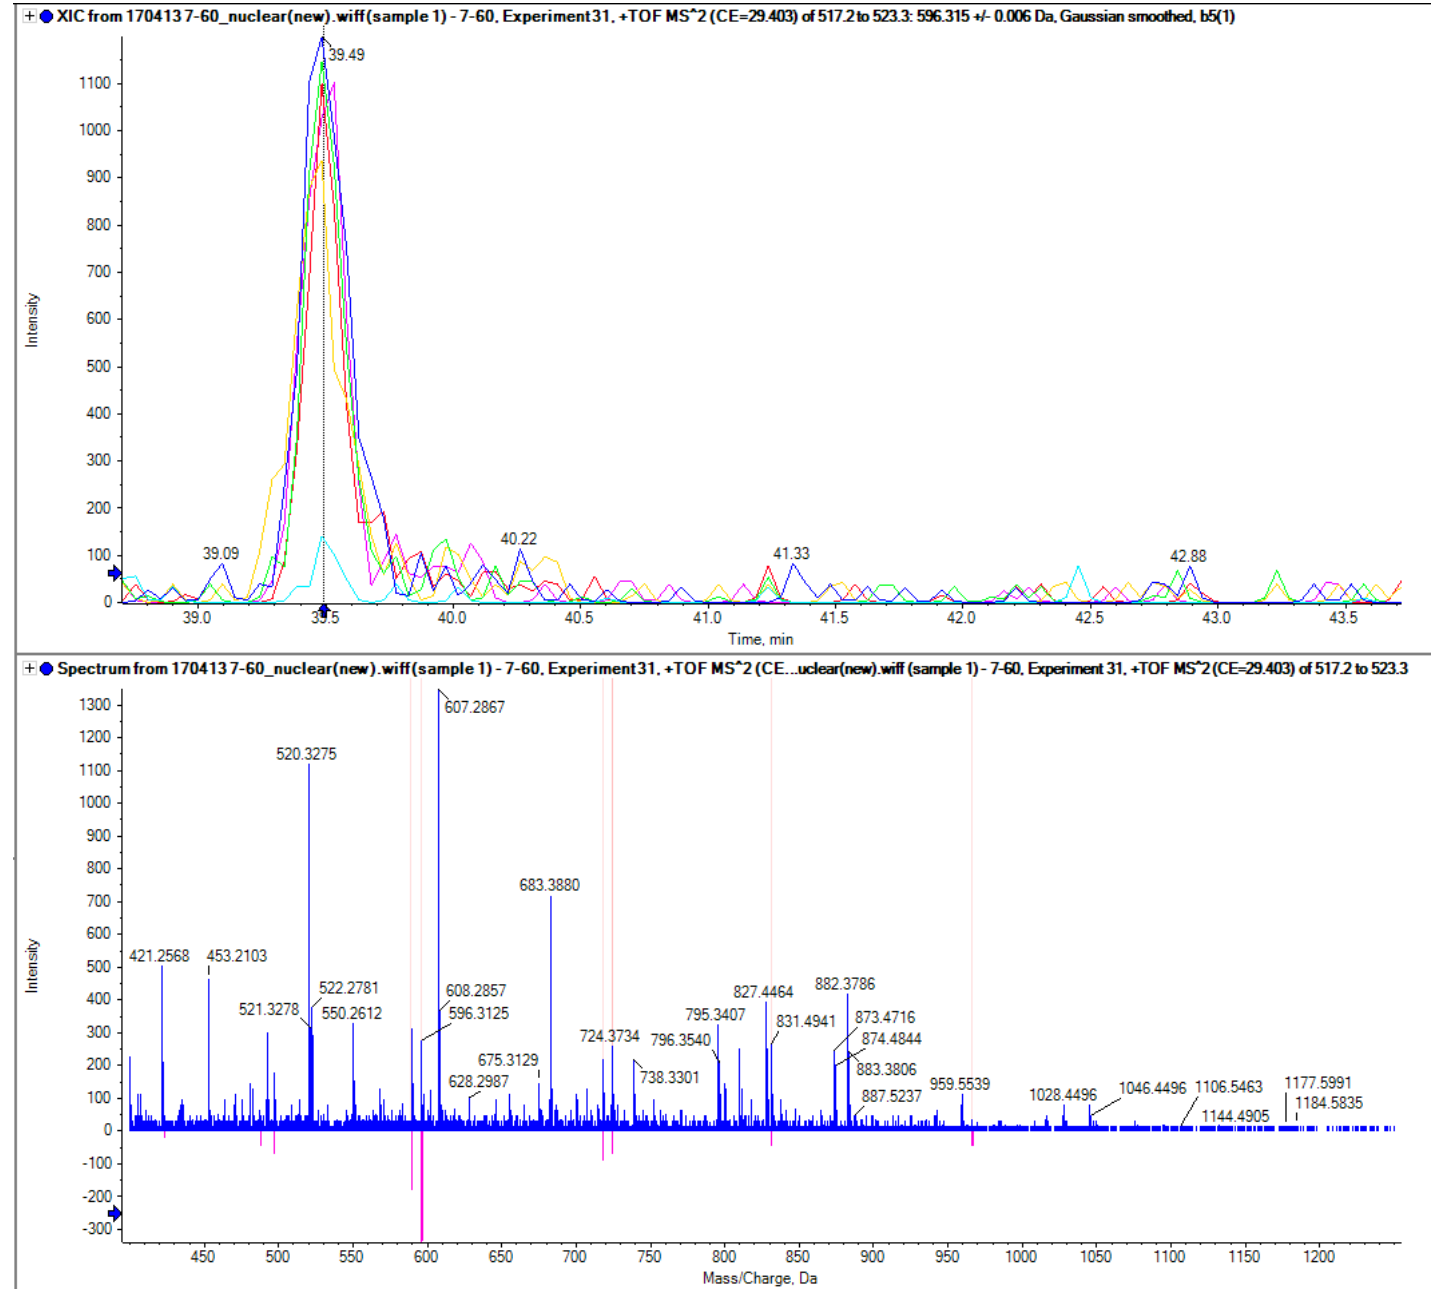

sp|P62753|RS6\_HUMAN

DIPGLDTTVPR

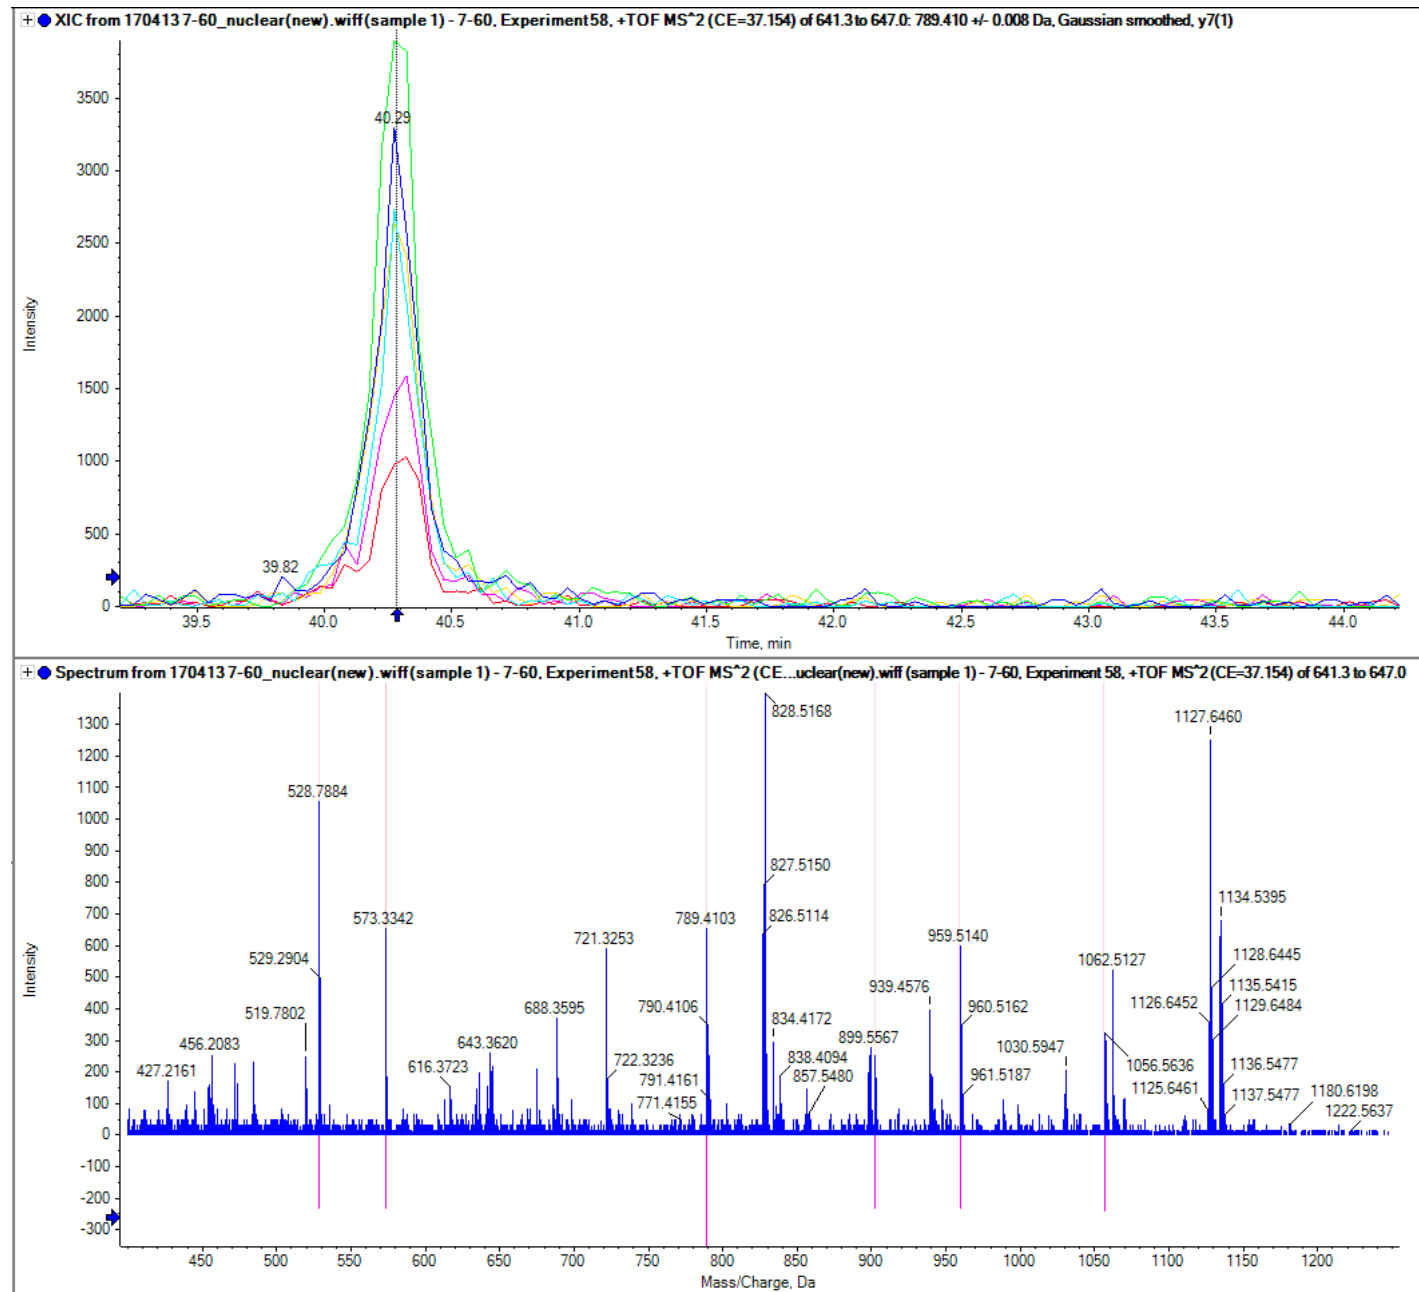

sp|Q16531|DDB1\_HUMAN

EMLGGEIIPR

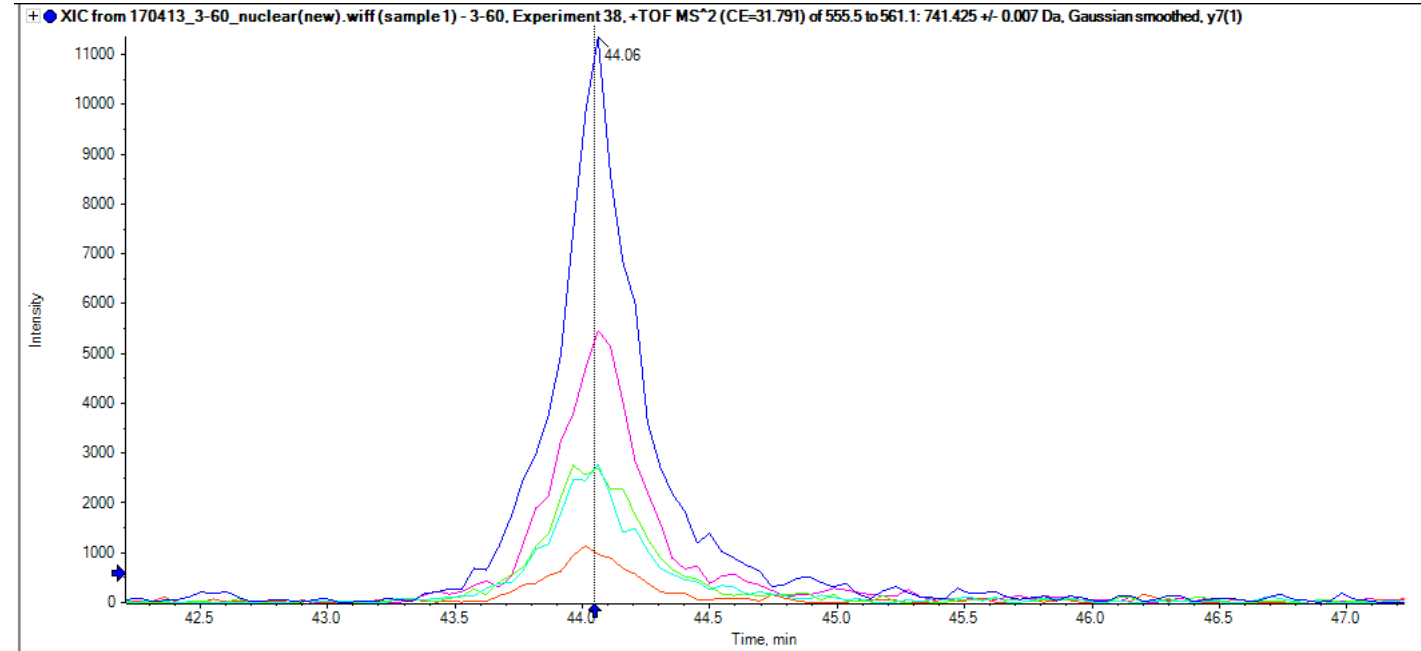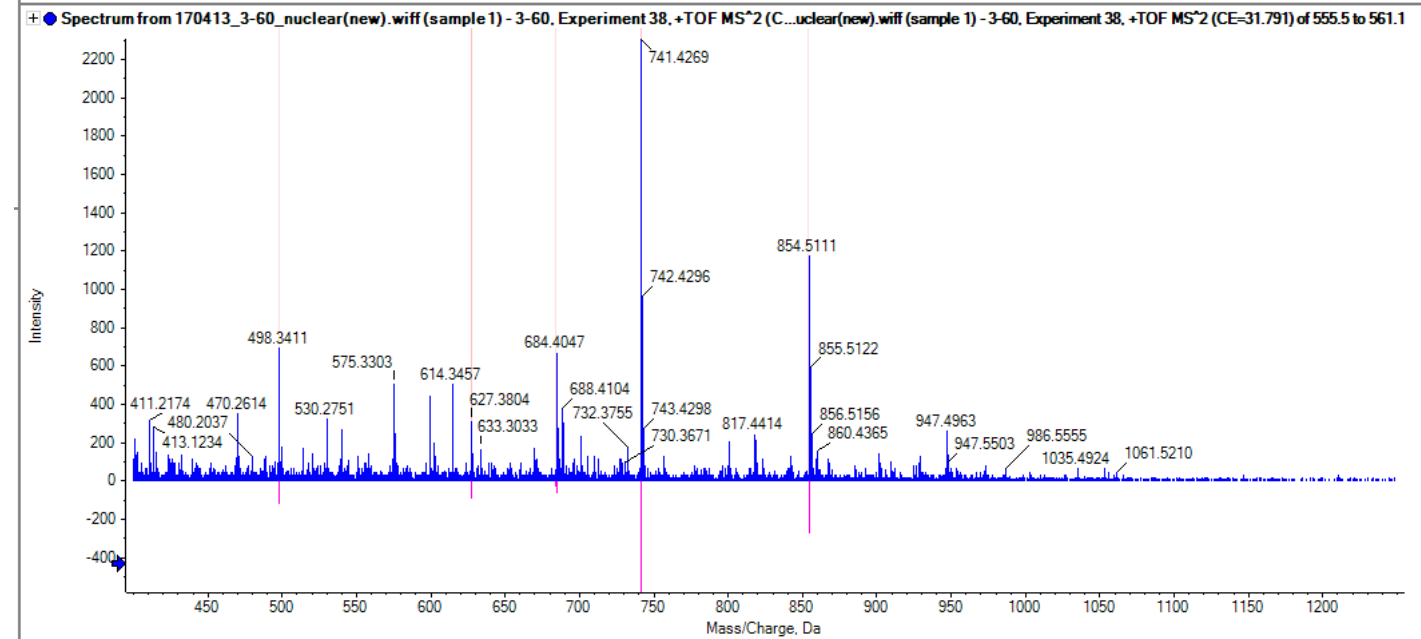

sp|P15531|NDKA\_HUMAN

YMHSGPVVAMVWEGLNVVK

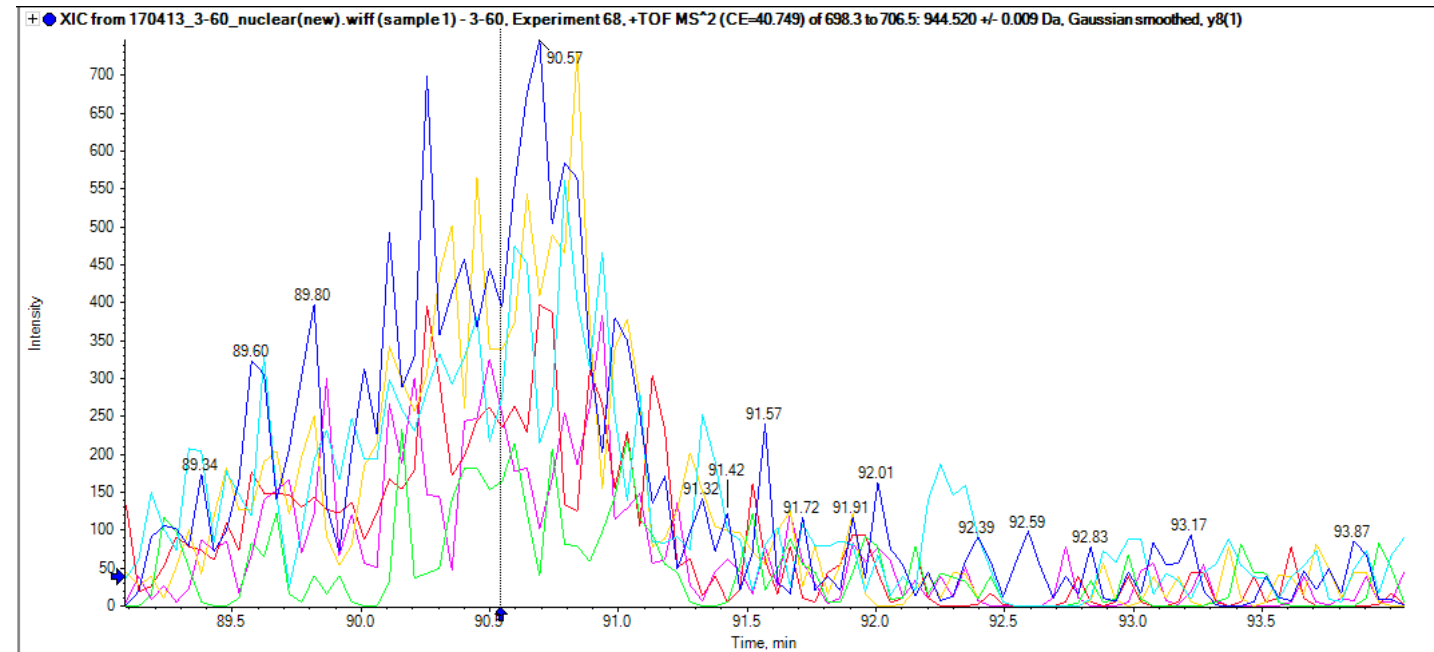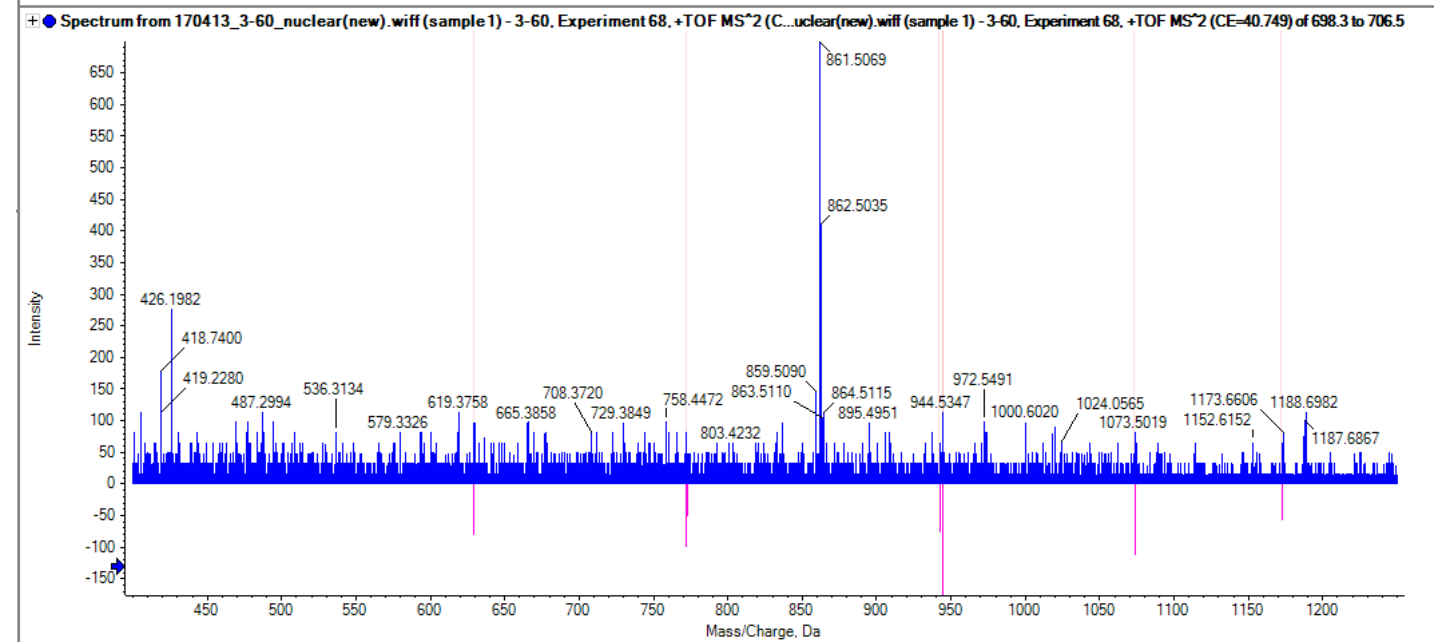



sp|P62910|RL32\_HUMAN

GQILMPNIGYGSNK

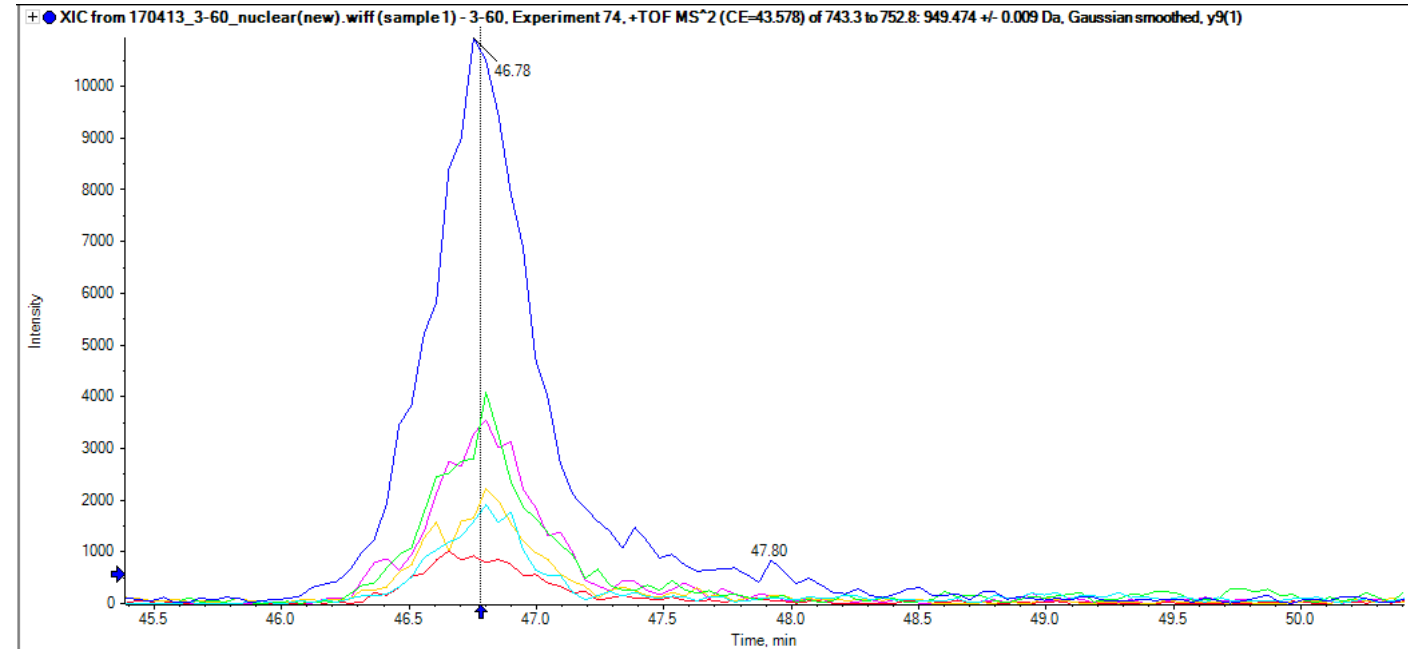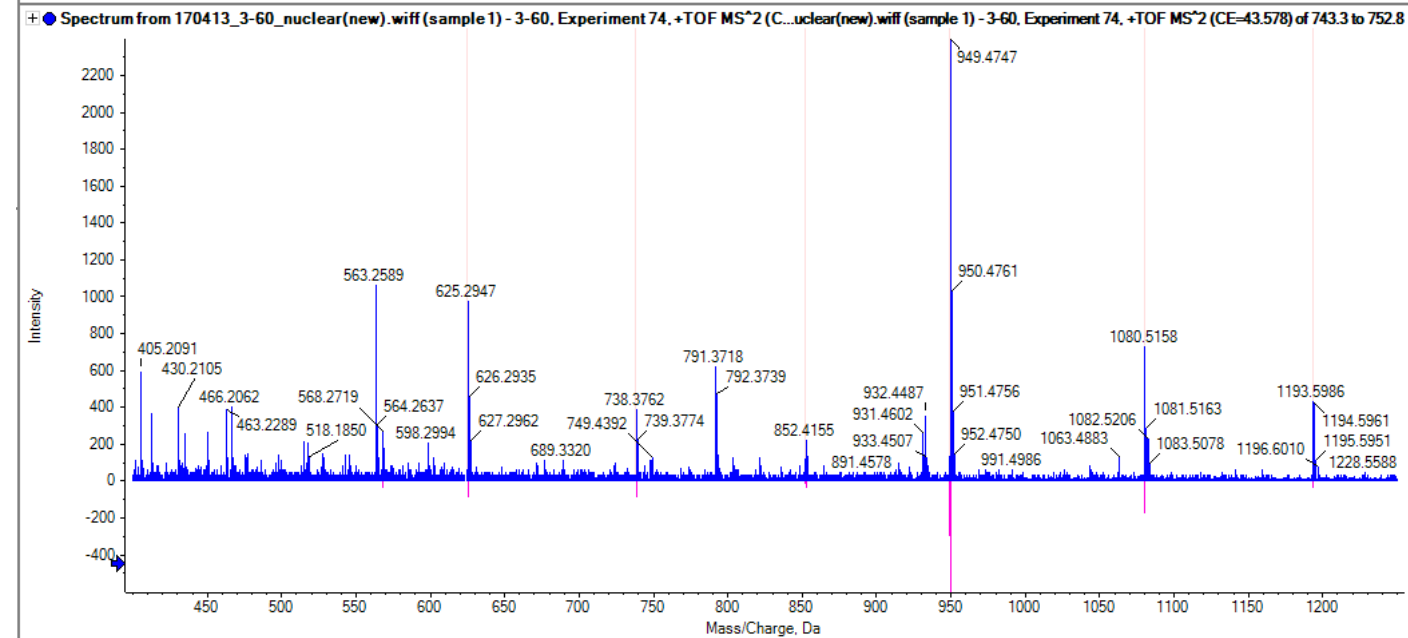

sp|Q68G75|LEMD1\_HUMAN

LGFSPPILPSTR

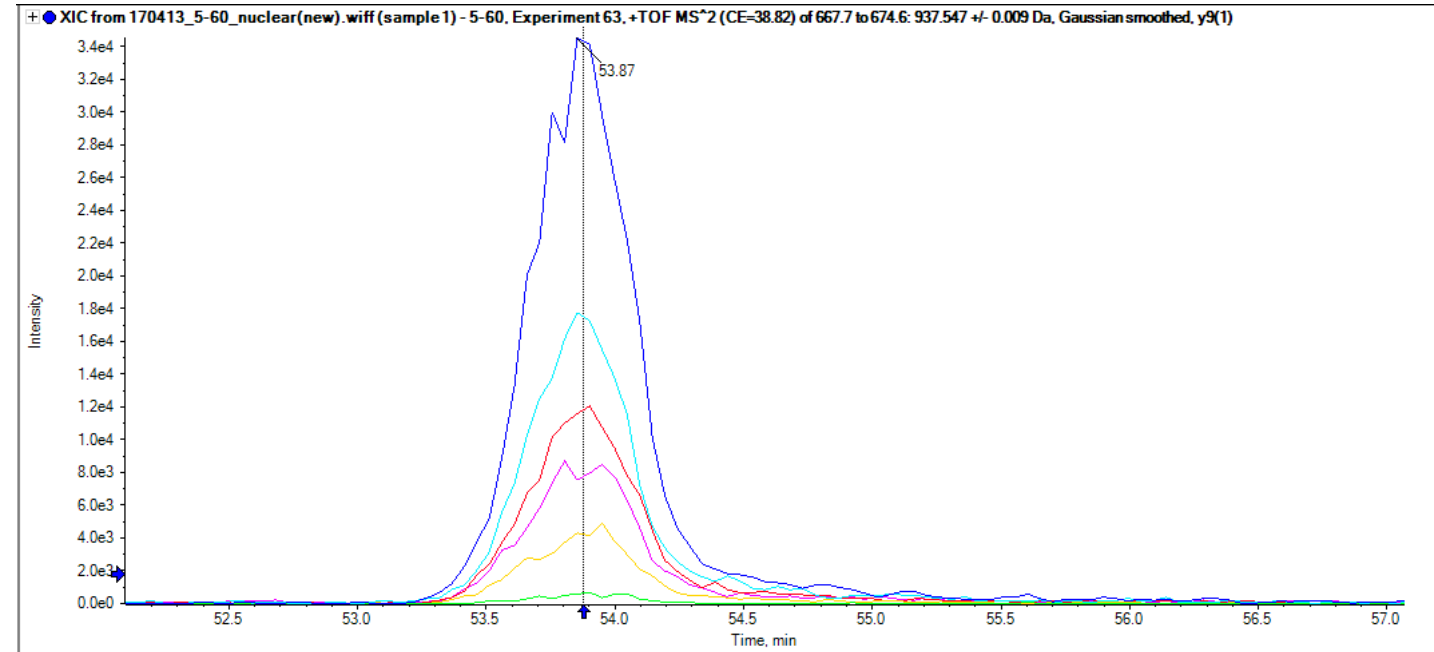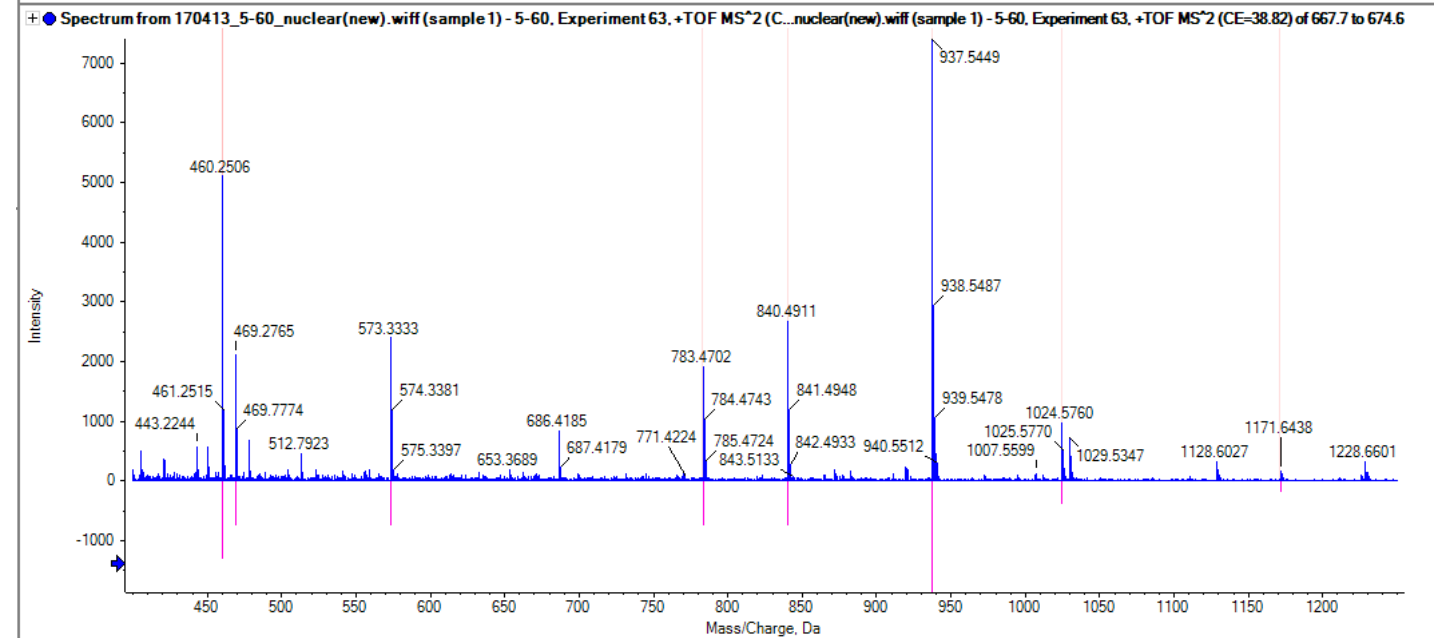

sp|P14618|KPYM\_HUMAN

GDLGIEIPAEK

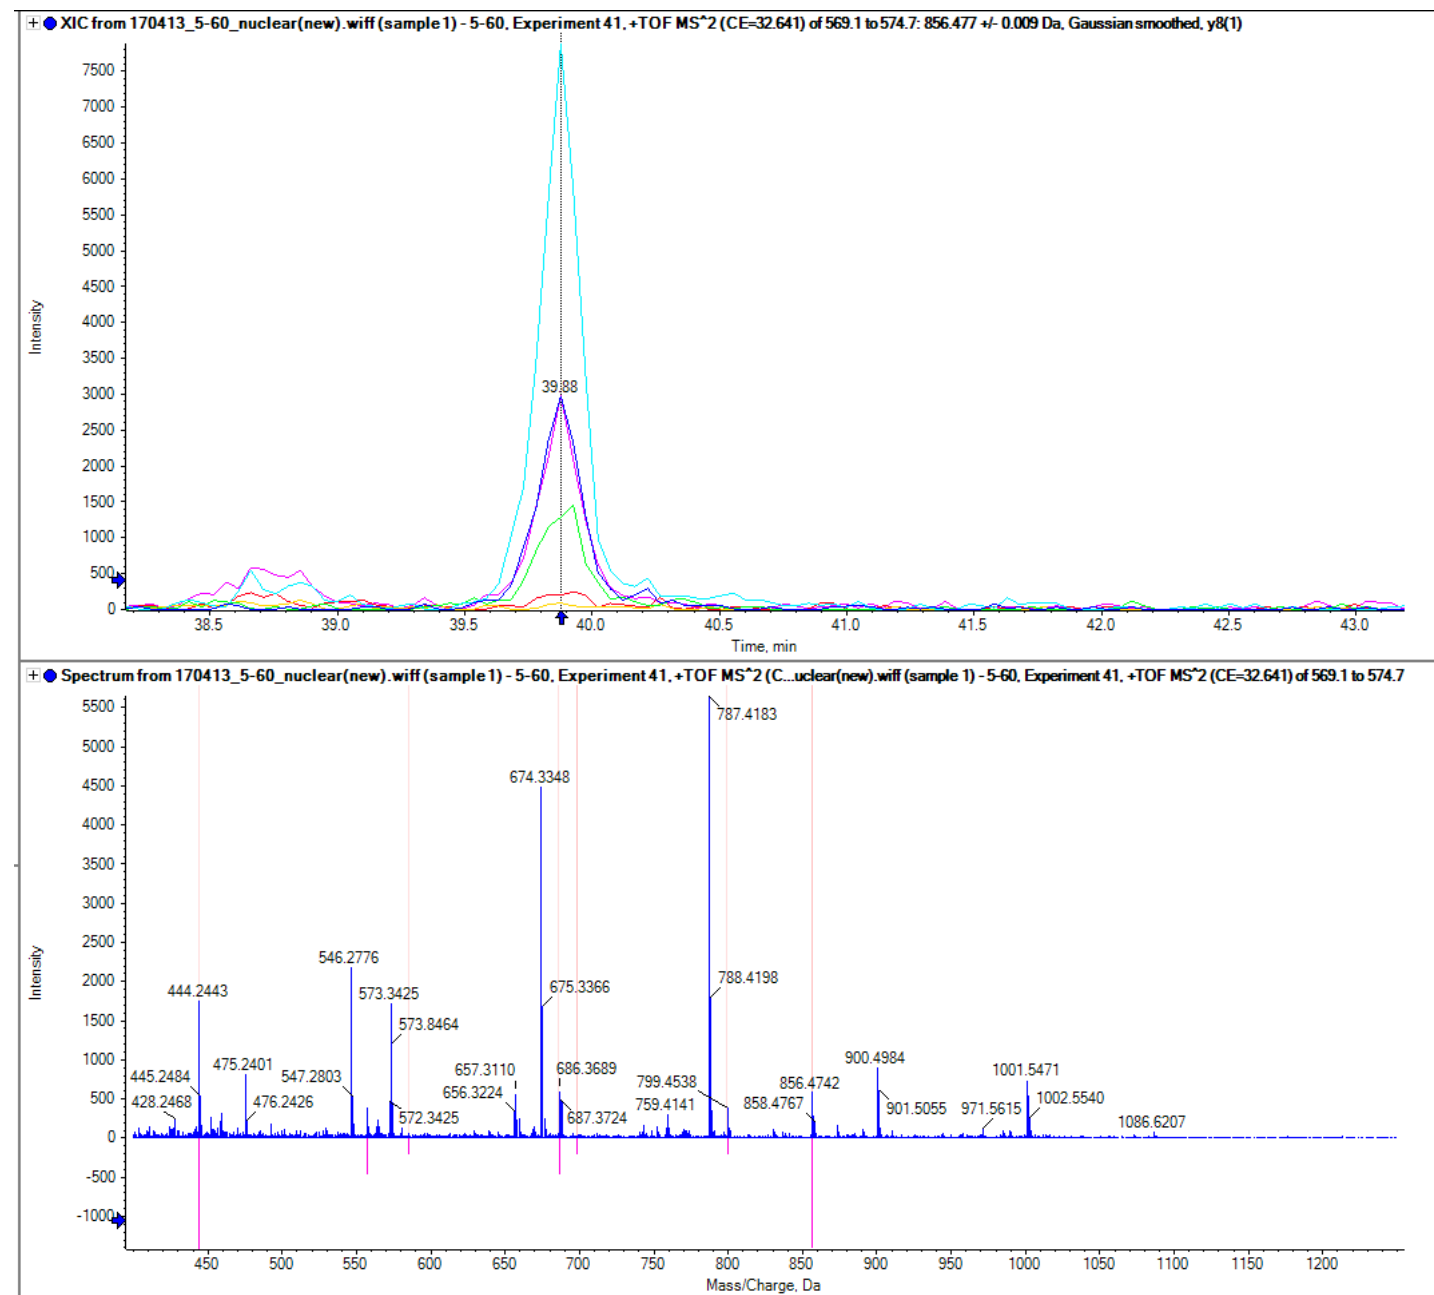

sp|O15050|TRNK1\_HUMAN

GDLGIEIPAEK

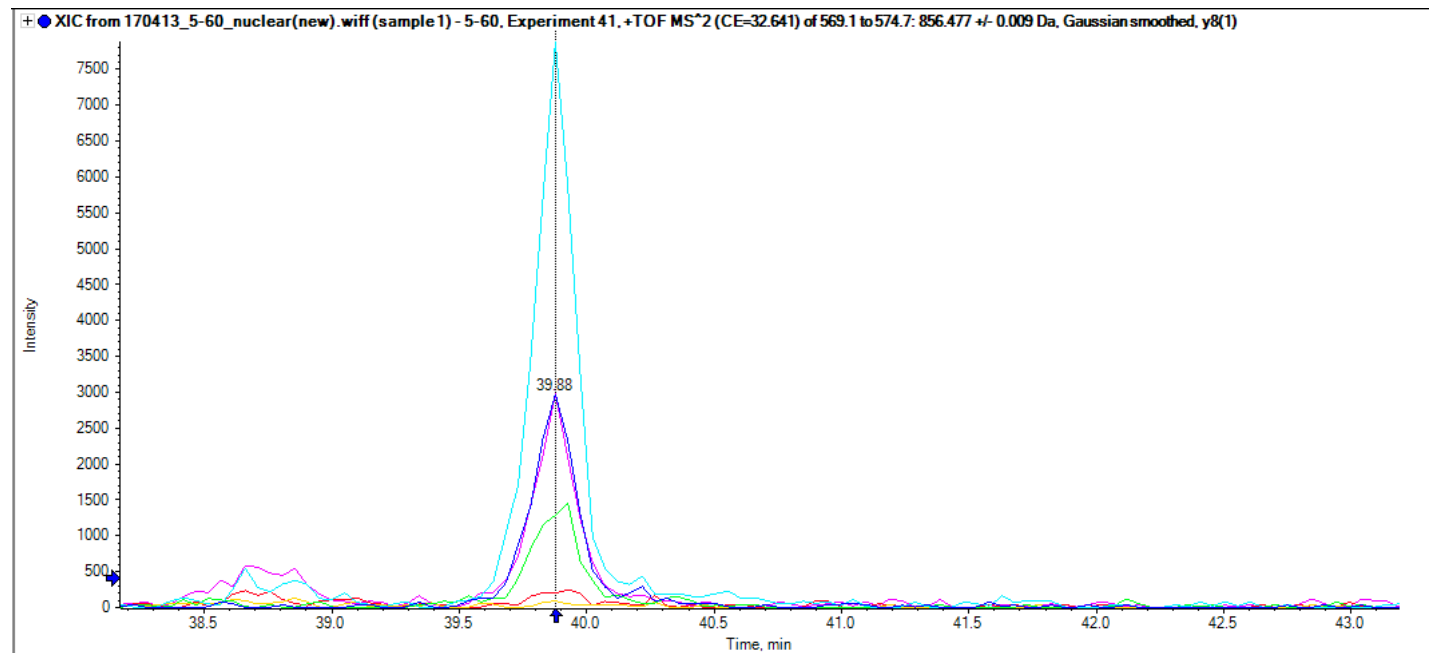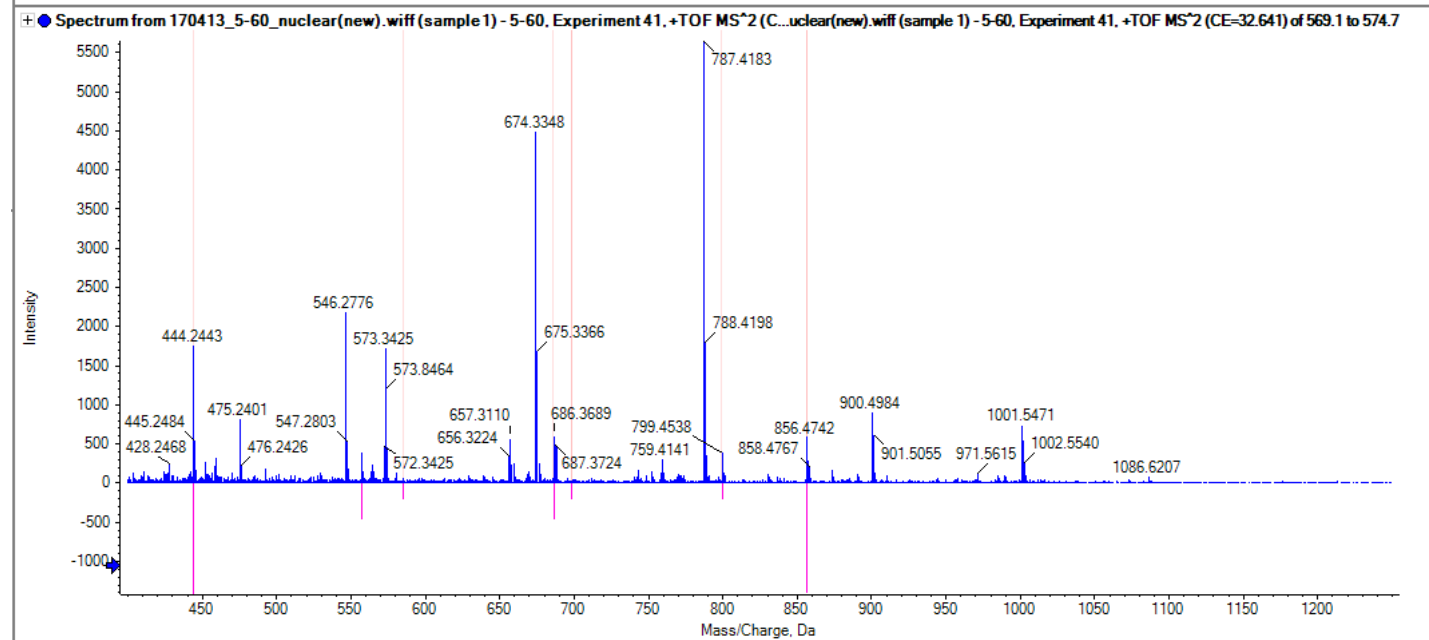

sp|Q8WW32|HMGB4\_HUMAN

YQEEMNYYVGK

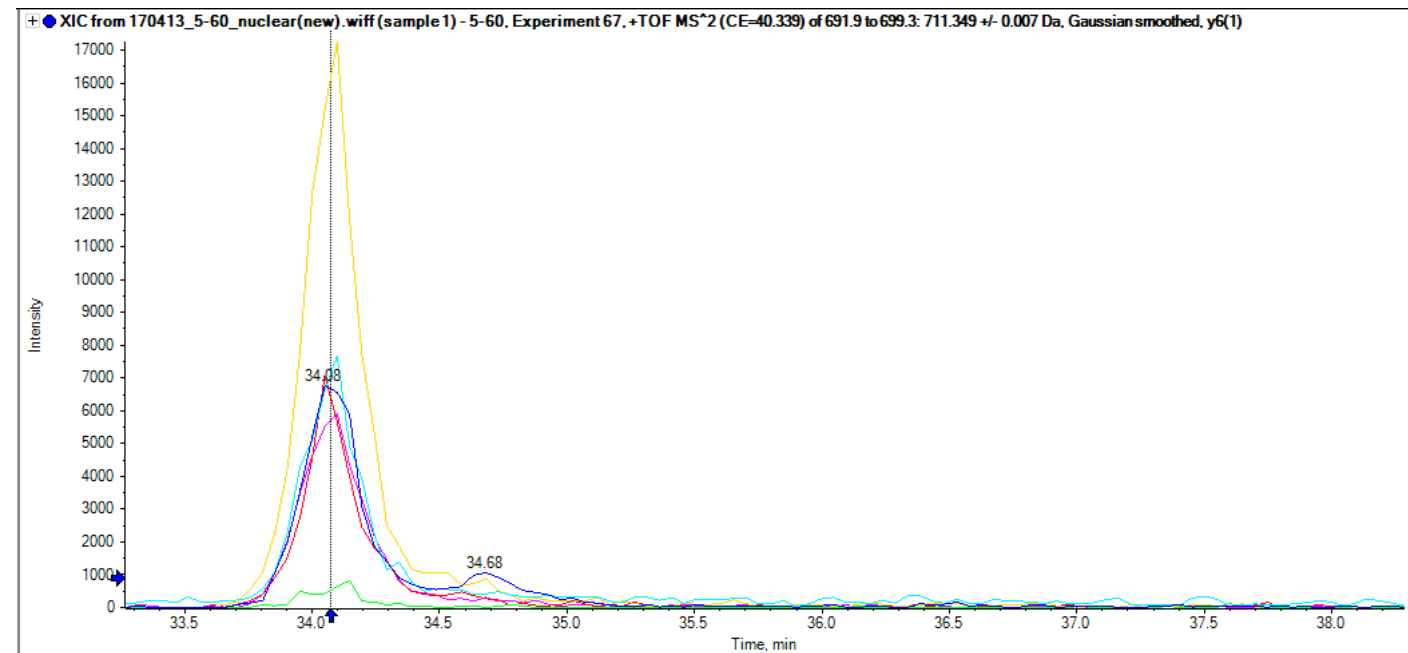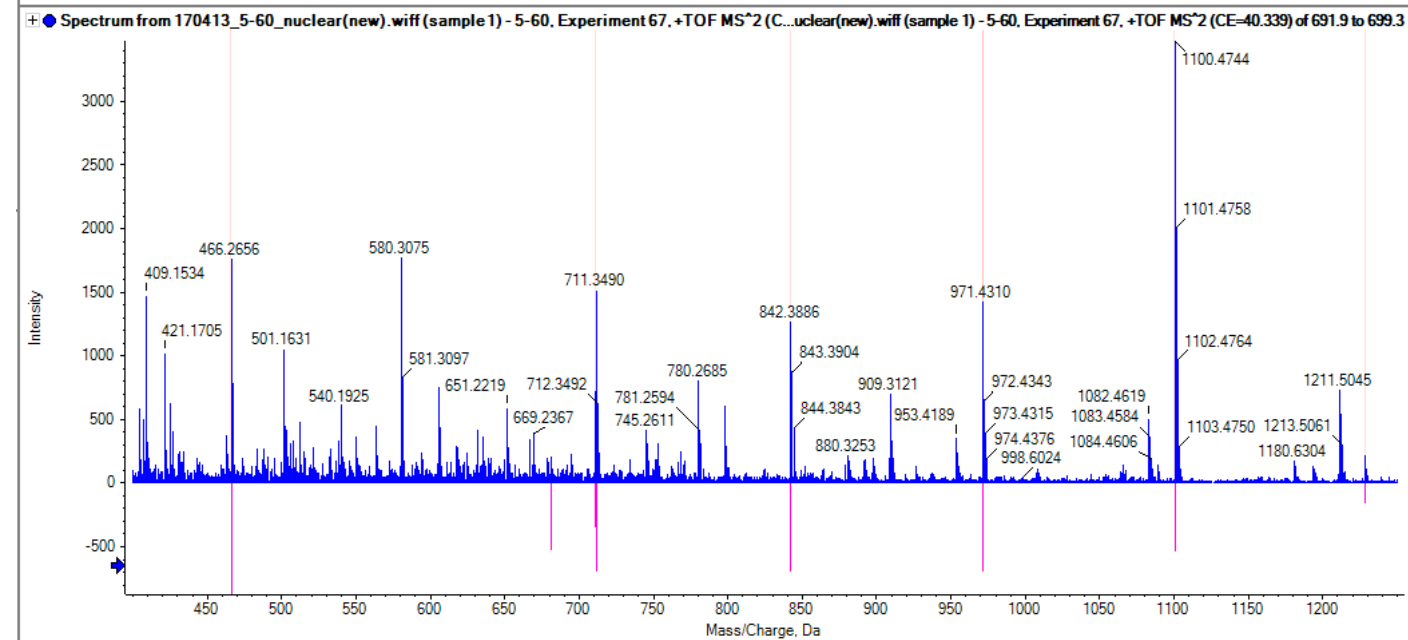

sp|Q9UIF3|TEKT2\_HUMAN

FVPEVDTFTR

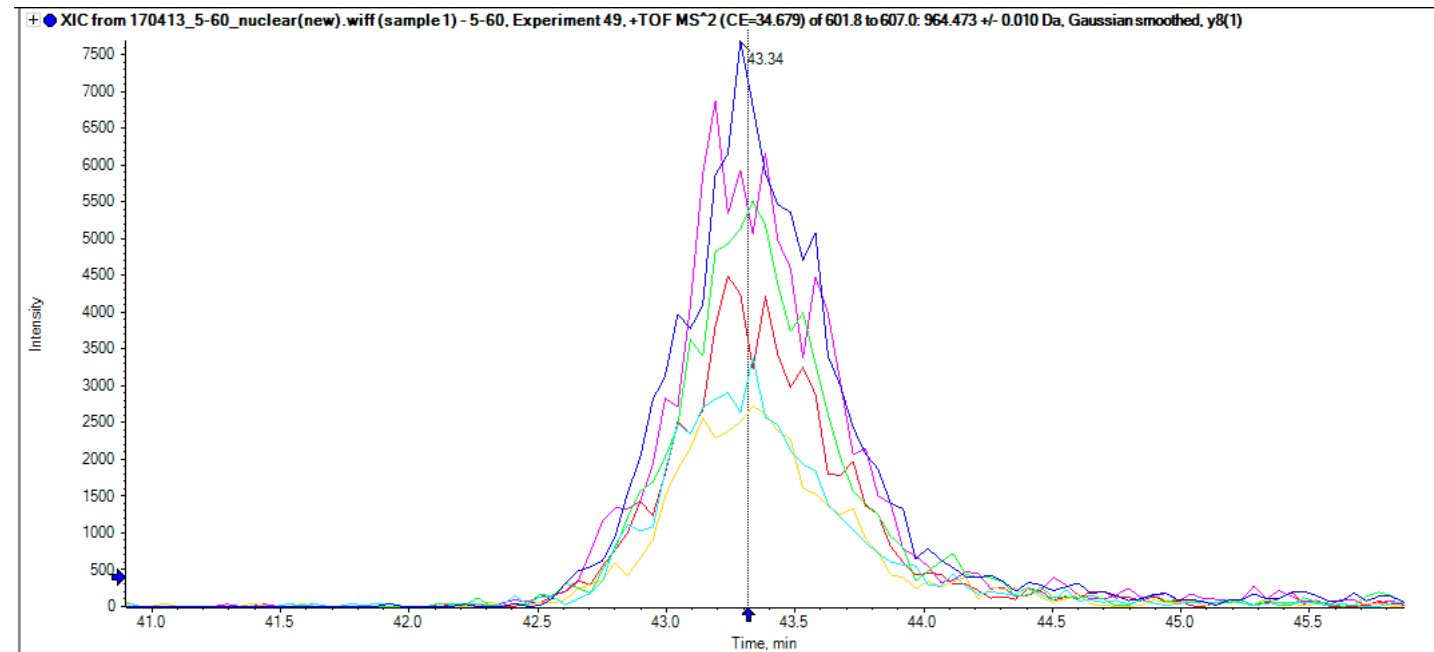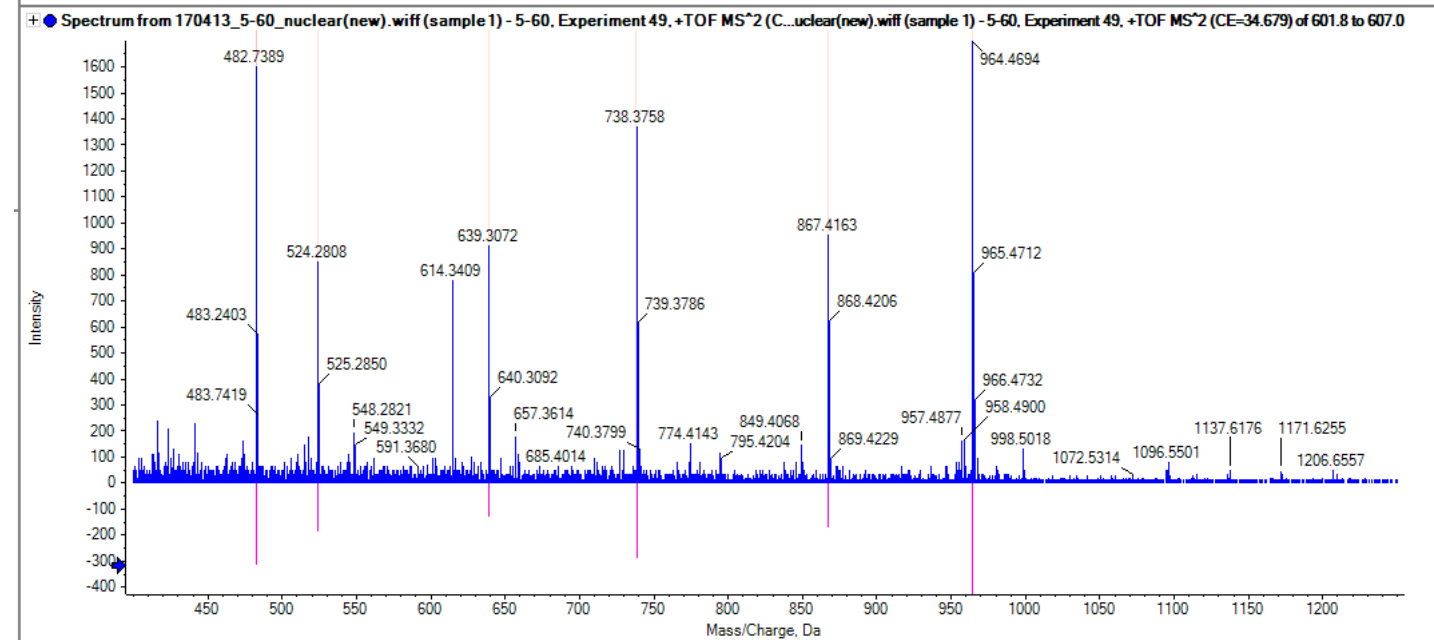

sp|Q7Z6W1|TMCO2\_HUMAN

NLEGIIVAQKPATK

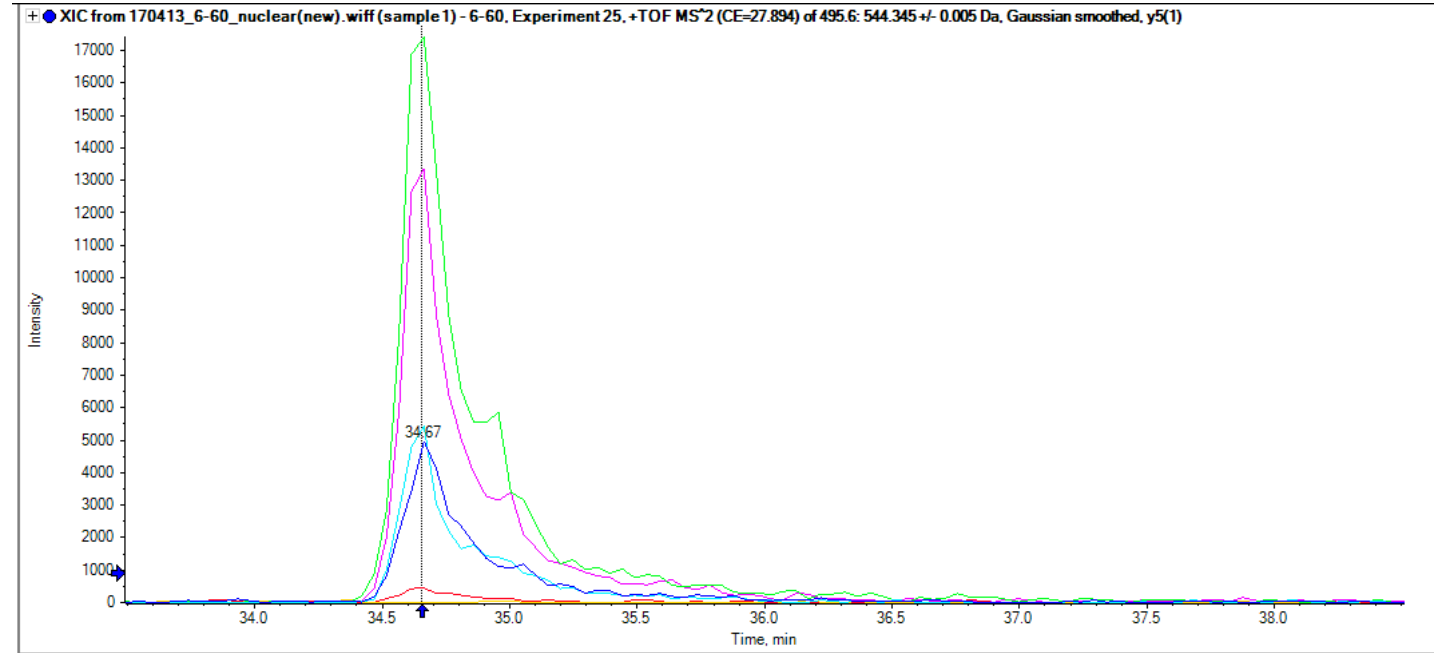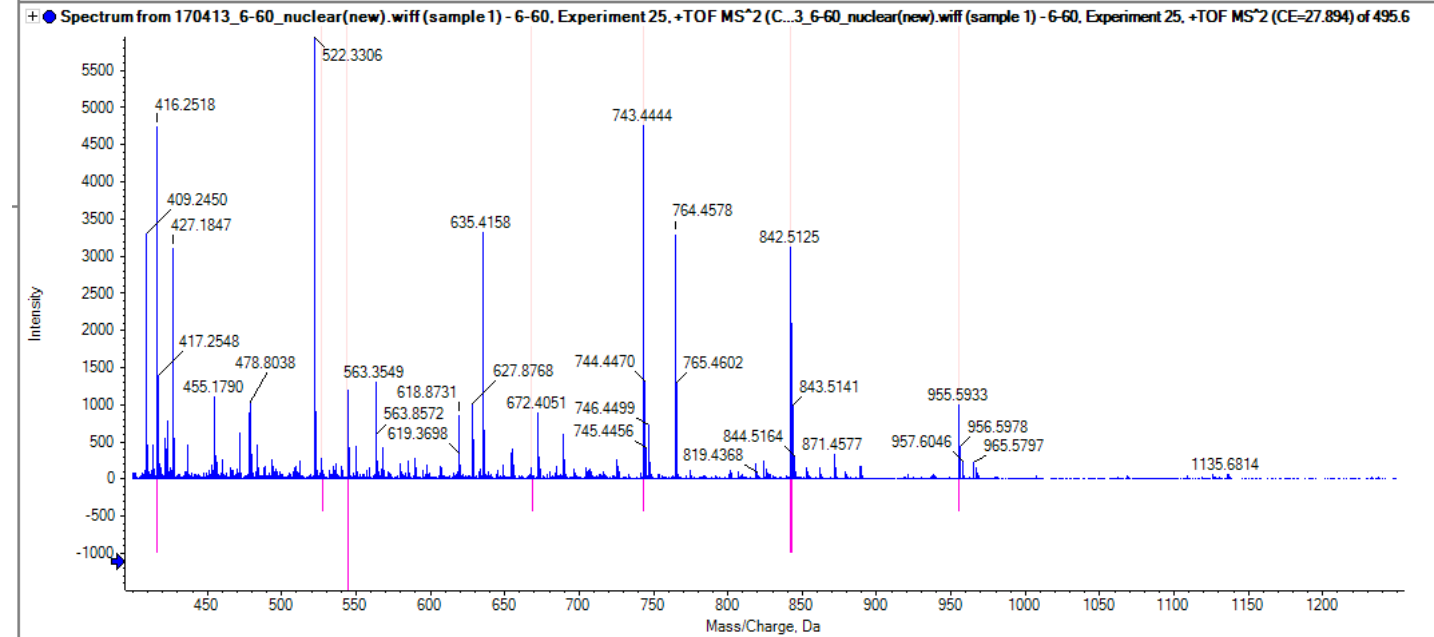

sp|Q09FC8|ZN415\_HUMAN

VTTAPKENLTCR

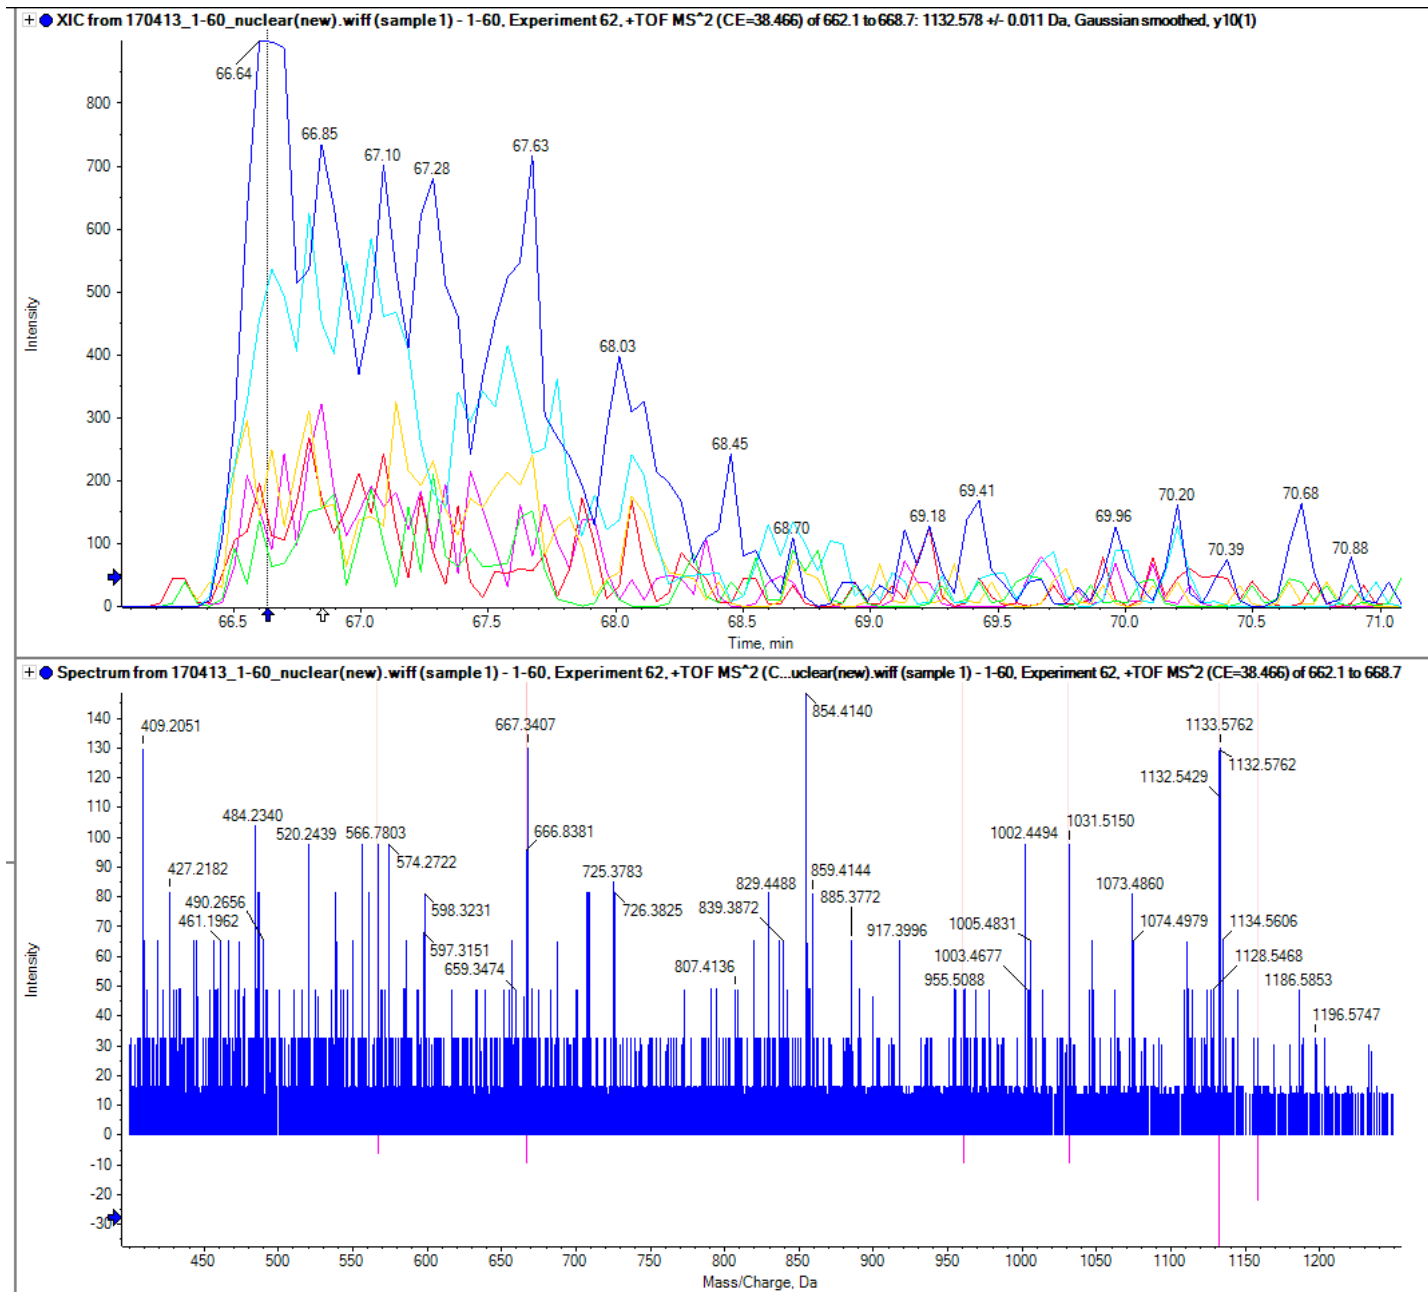



sp|Q3LXA3|TKFC\_HUMAN

LEQPDPGAVAAAAILR

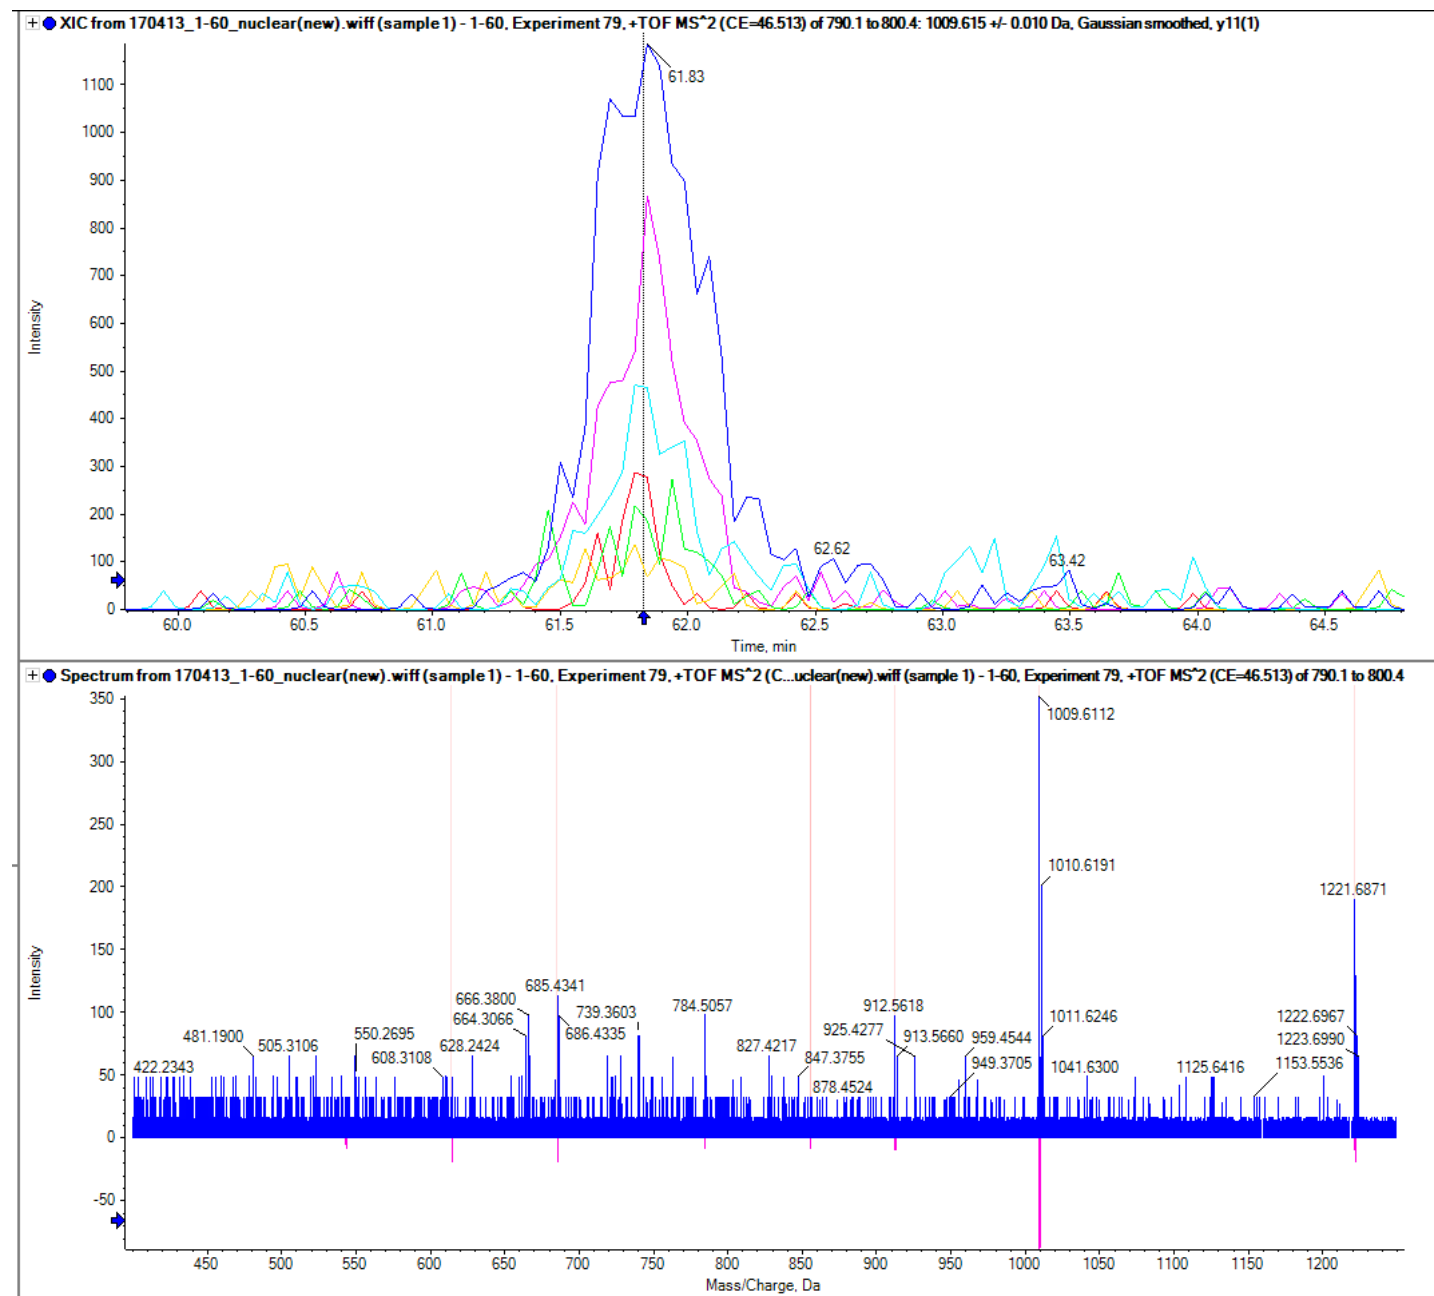

Supplement: 153528_1_supp_445512_q2n55f.pdf [file 153528_1_supp_445512_q2n55f.pdf]
